# Supplementary material for: How many mosquito nets are needed to maintain universal coverage: an update
Source: Springer Nature journal article supplement (doi:10.1186/s12936-023-04609-z), 2023-06-30

# Supplementary File 1: Estimated ITN access under different distribution strategy scenarios and quantification factors

Hannah Koenker

05 June, 2023

## Contents

|                                                                                                                                                 |            |
|-------------------------------------------------------------------------------------------------------------------------------------------------|------------|
| <b>1 Scenario 1 - Mass campaigns every three years with varying routine ANC/EPI distribution</b>                                                | <b>2</b>   |
| <b>2 Scenario 2 - ANC/EPI distribution at 6%, varying annual school/community distribution</b>                                                  | <b>5</b>   |
| <b>3 Scenario 3 - Three-year mass campaigns with ANC/EPI distribution at 6%, varying annual school/community distribution between campaigns</b> | <b>56</b>  |
| <b>4 Scenario 4 - Three-year mass campaigns with ANC/EPI distribution at 6%, varying campaign quantifier</b>                                    | <b>97</b>  |
| <b>5 Scenario 5 - Two-year mass campaigns with ANC/EPI distribution at 6%, varying campaign quantifier</b>                                      | <b>117</b> |
| <b>6 Scenario 6 - Two-year mass campaigns with varying ANC/EPI distribution</b>                                                                 | <b>133</b> |

# 1 Scenario 1 - Mass campaigns every three years with varying routine ANC/EPI distribution

3-year mass campaigns with ANC/EPI at 5% of the population

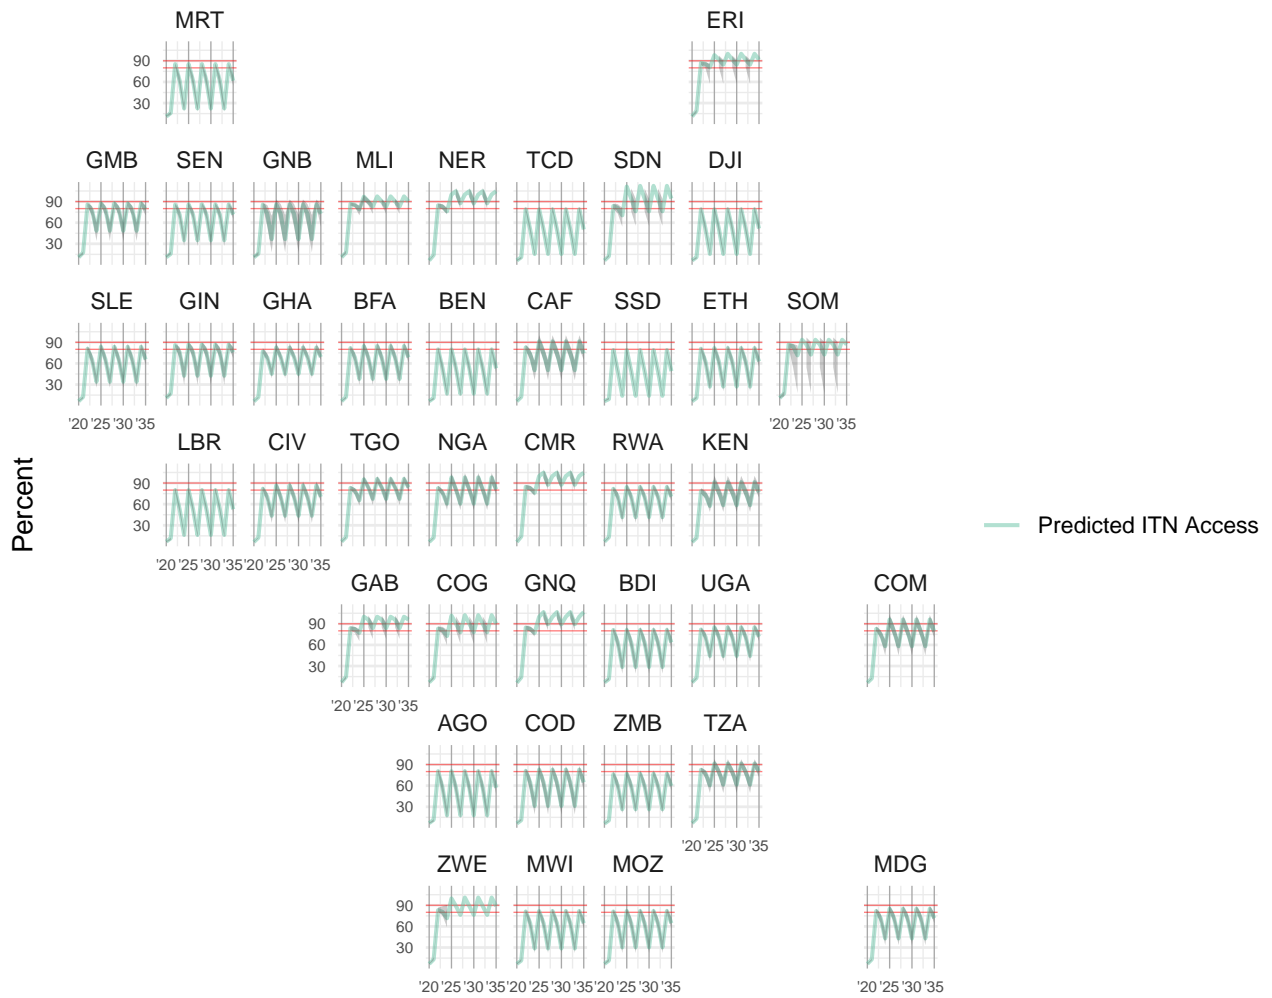

### 3-year mass campaigns with ANC/EPI at 6 % of the population

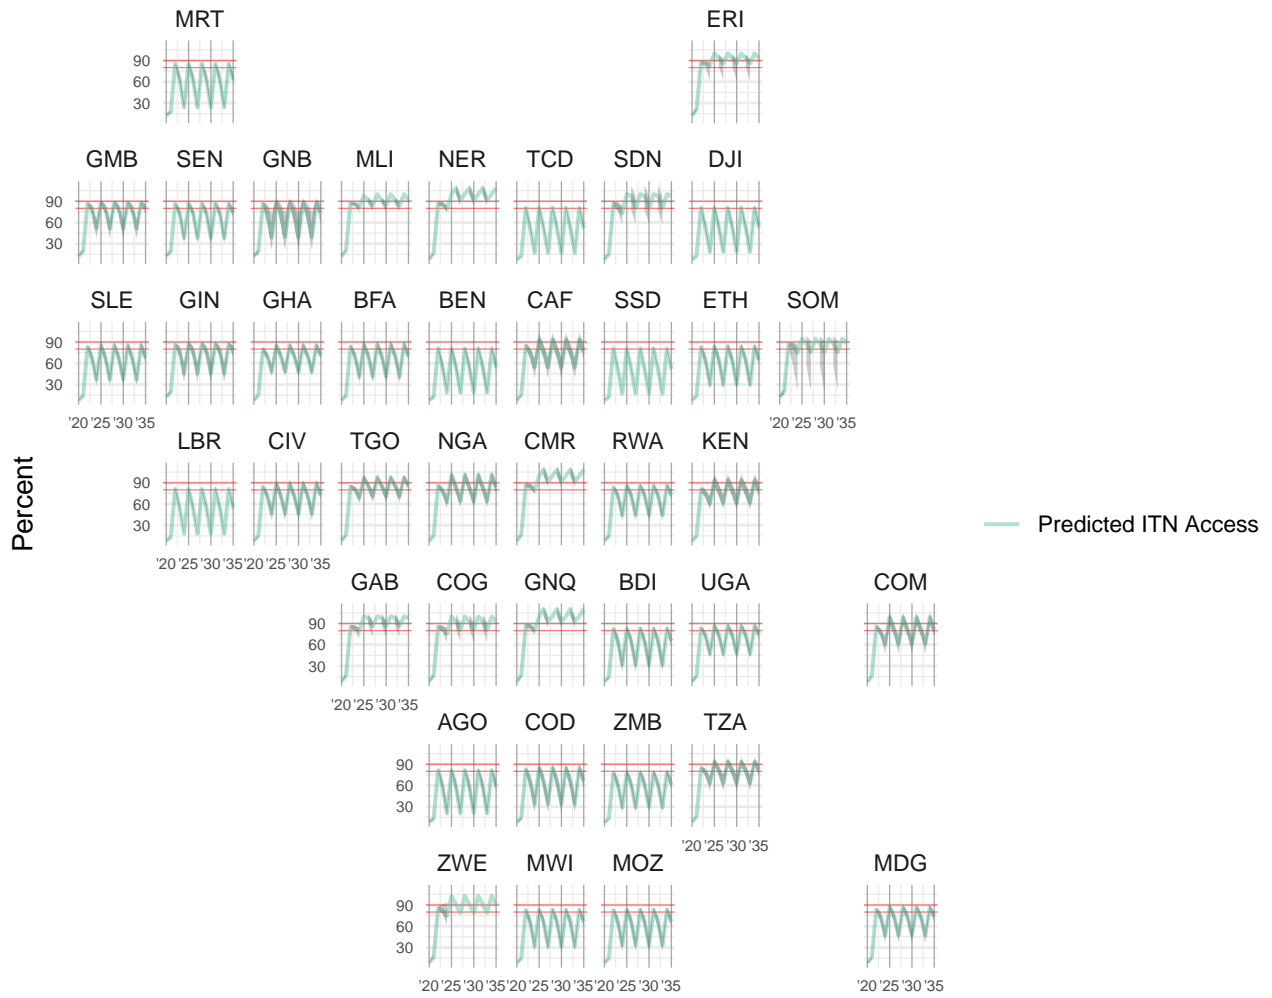

### 3-year mass campaigns with ANC/EPI at 7 % of the population

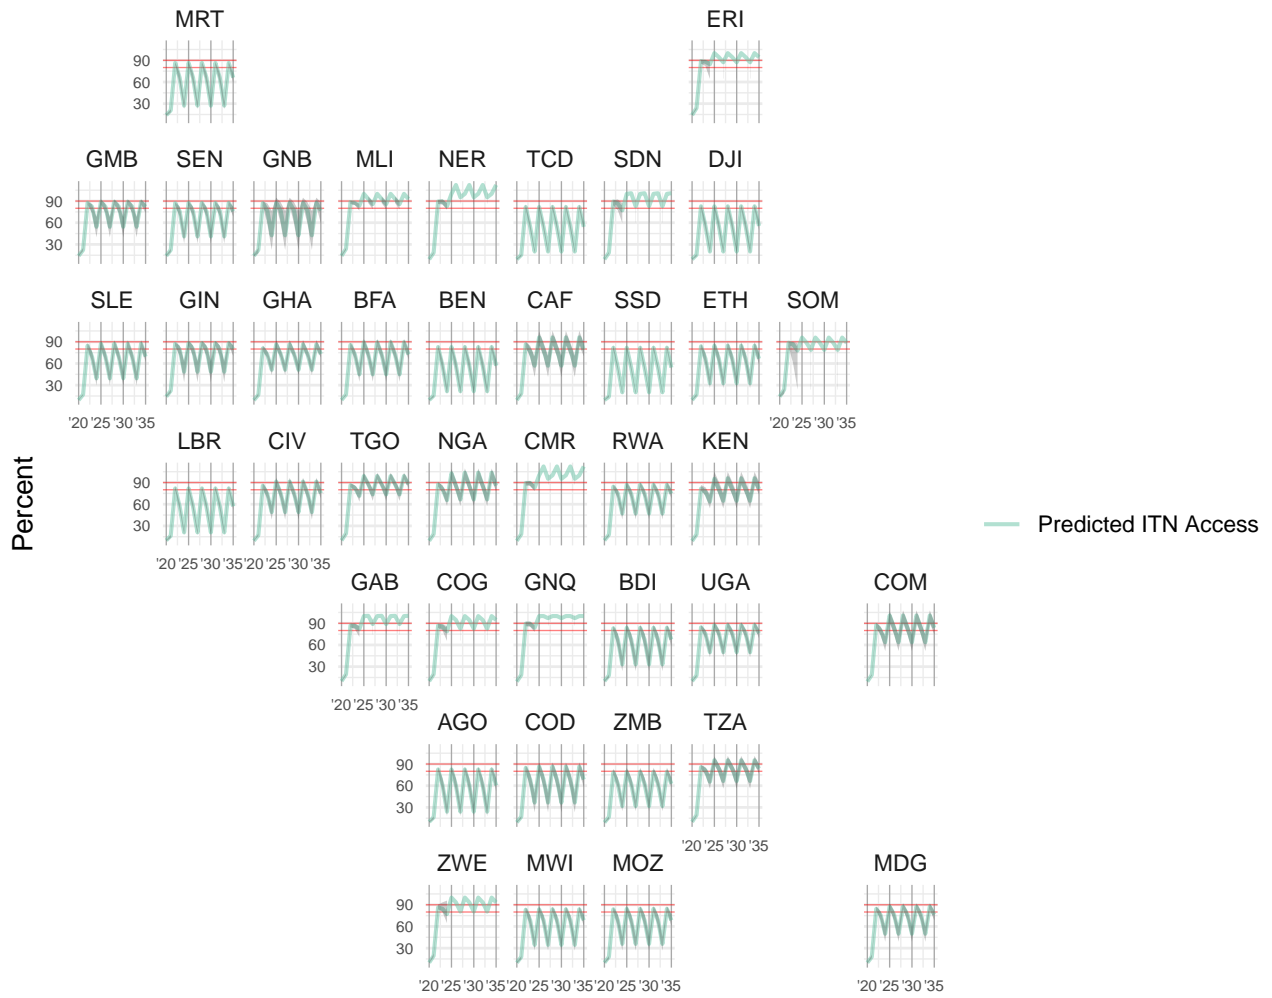

## 2 Scenario 2 - ANC/EPI distribution at 6%, varying annual school/community distribution

ANC/EPI at 6% and annual school/community distribution at 0 % of the population

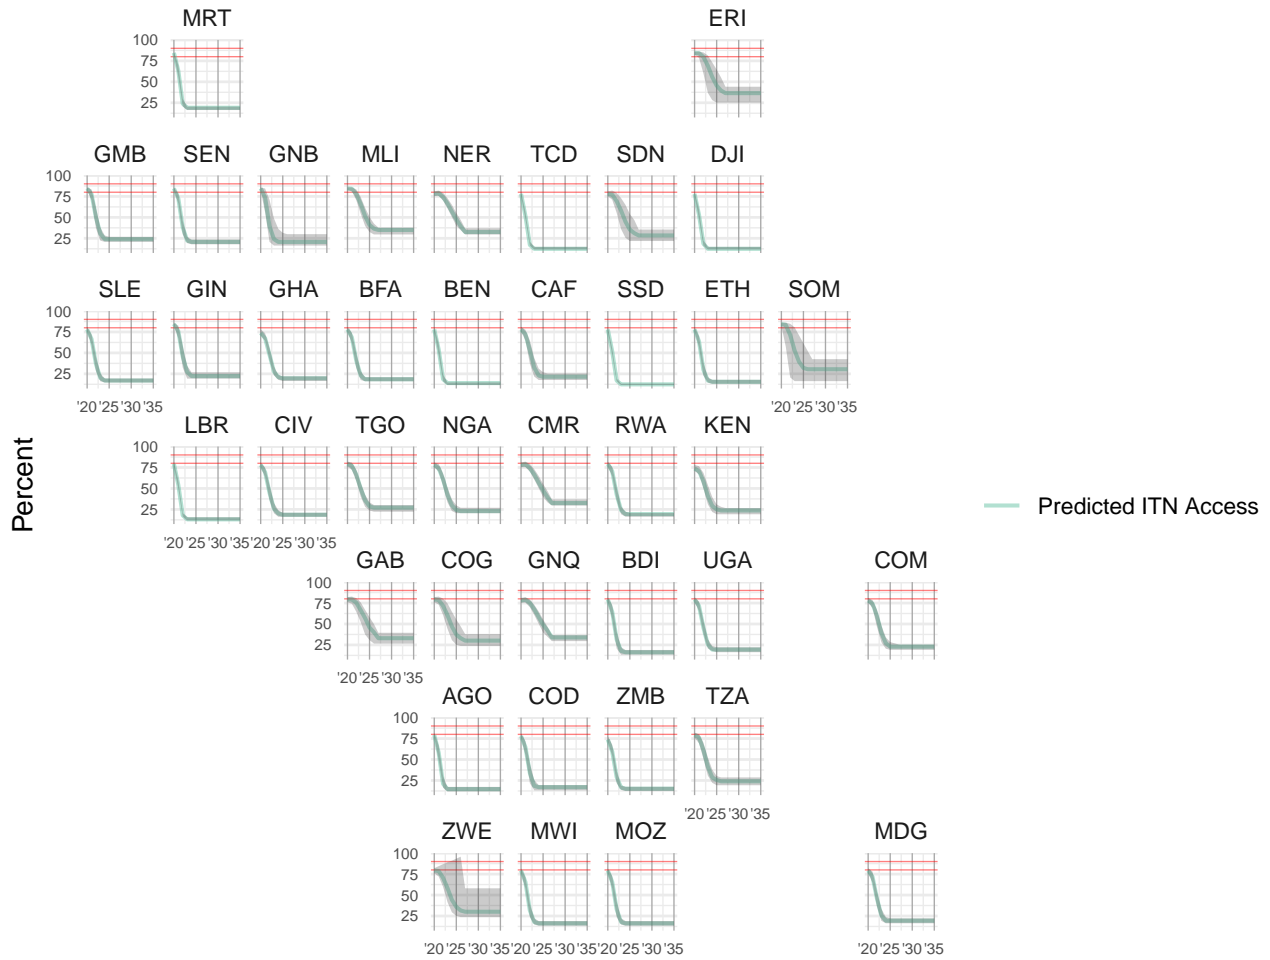

# ANC/EPI at 6% and annual school/community distribution at 1 % of the population

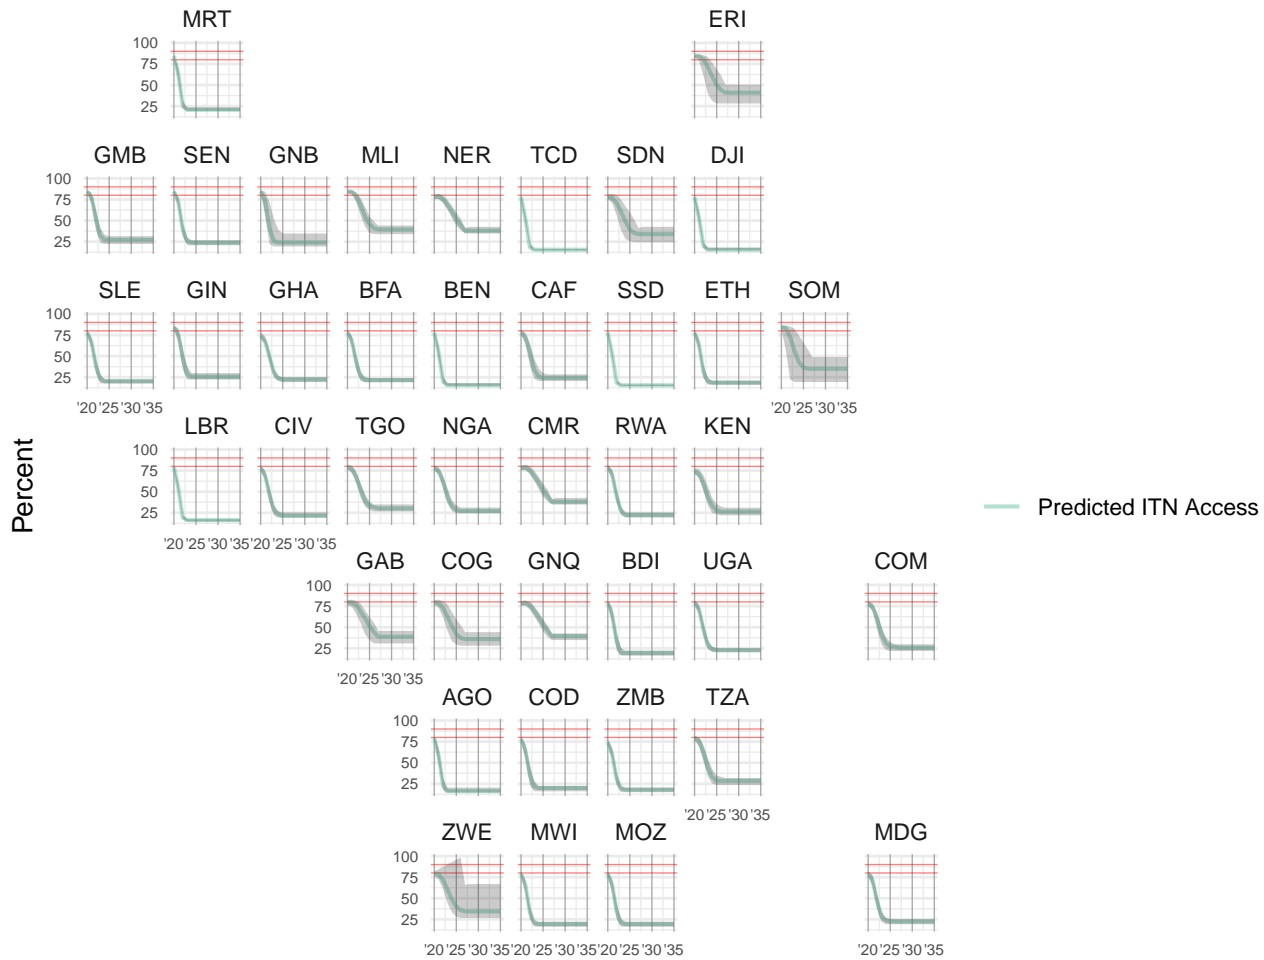

# ANC/EPI at 6% and annual school/community distribution at 2 % of the population

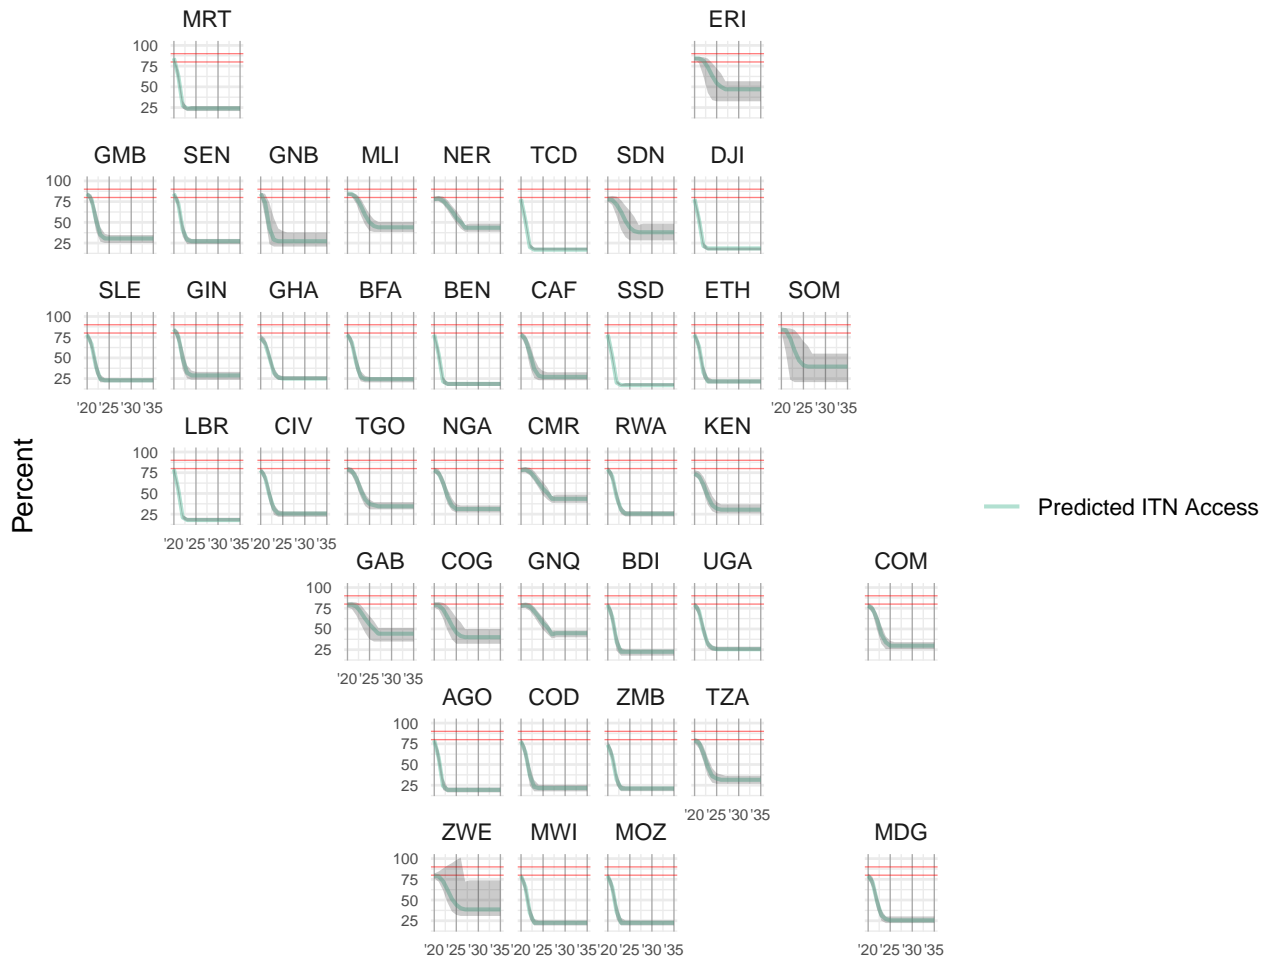

# ANC/EPI at 6% and annual school/community distribution at 3 % of the population

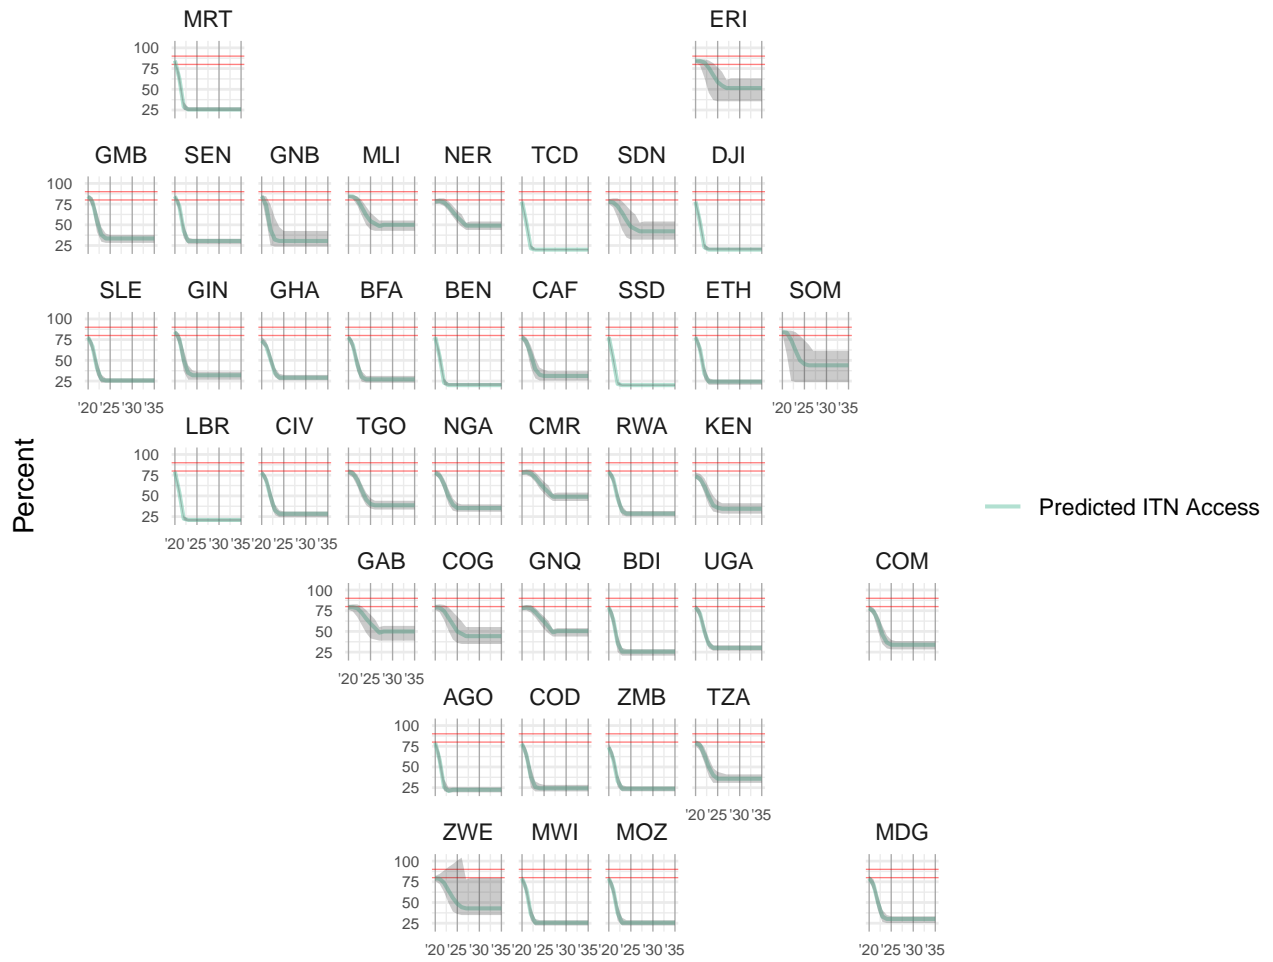



# ANC/EPI at 6% and annual school/community distribution at 4 % of the population

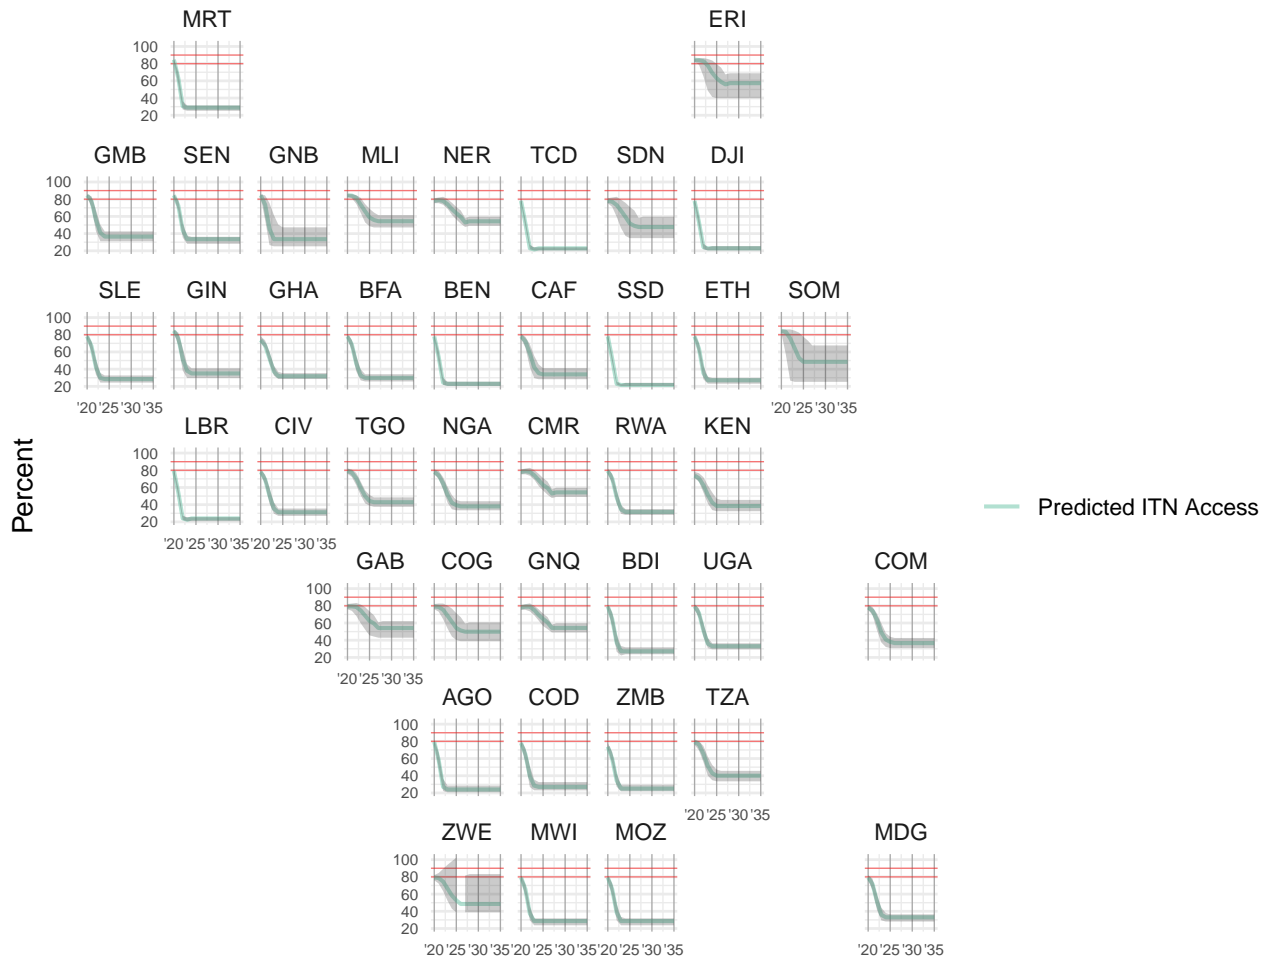

# ANC/EPI at 6% and annual school/community distribution at 5 % of the population

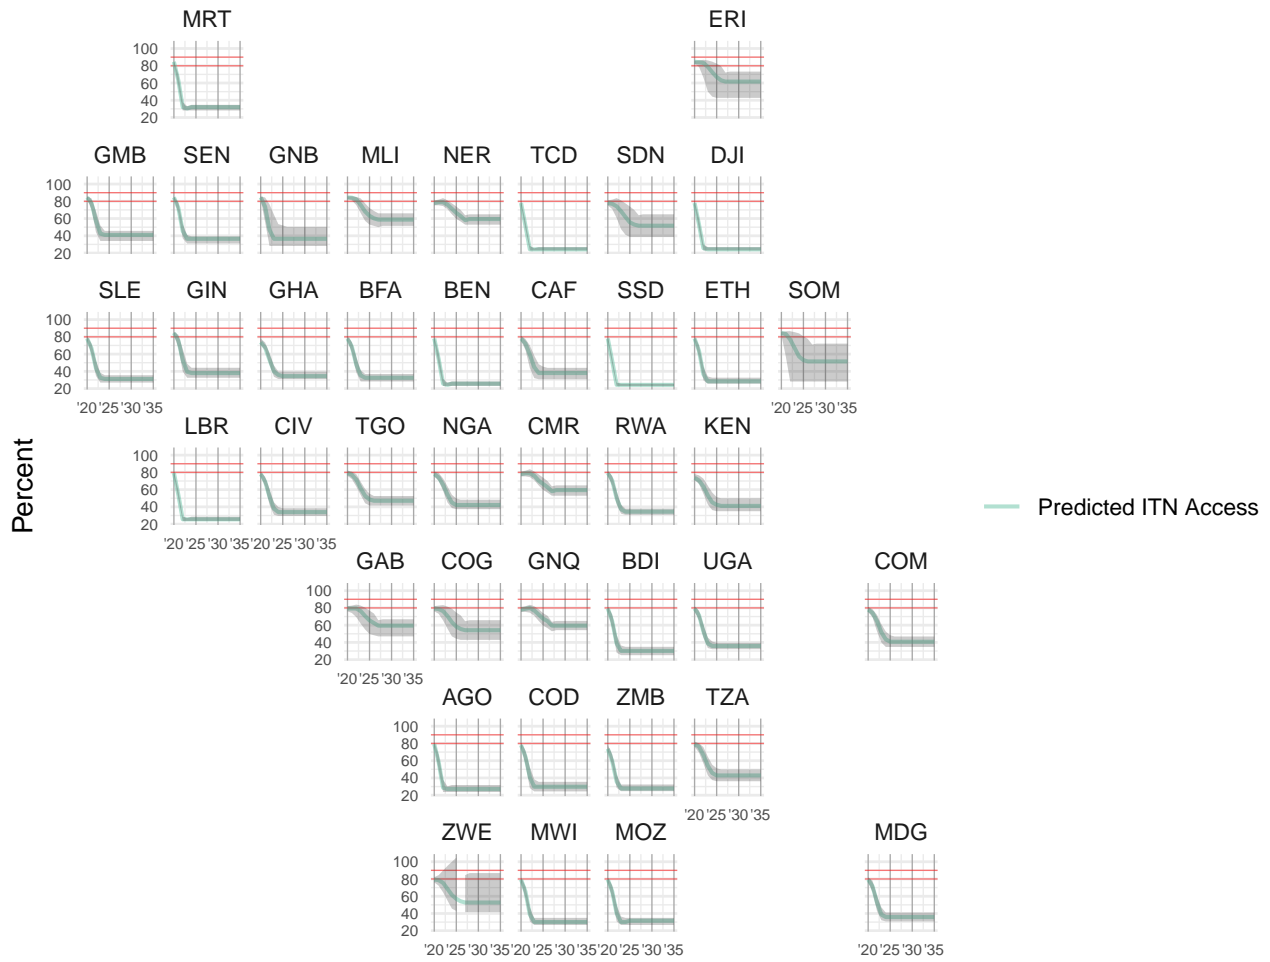

# ANC/EPI at 6% and annual school/community distribution at 6 % of the population

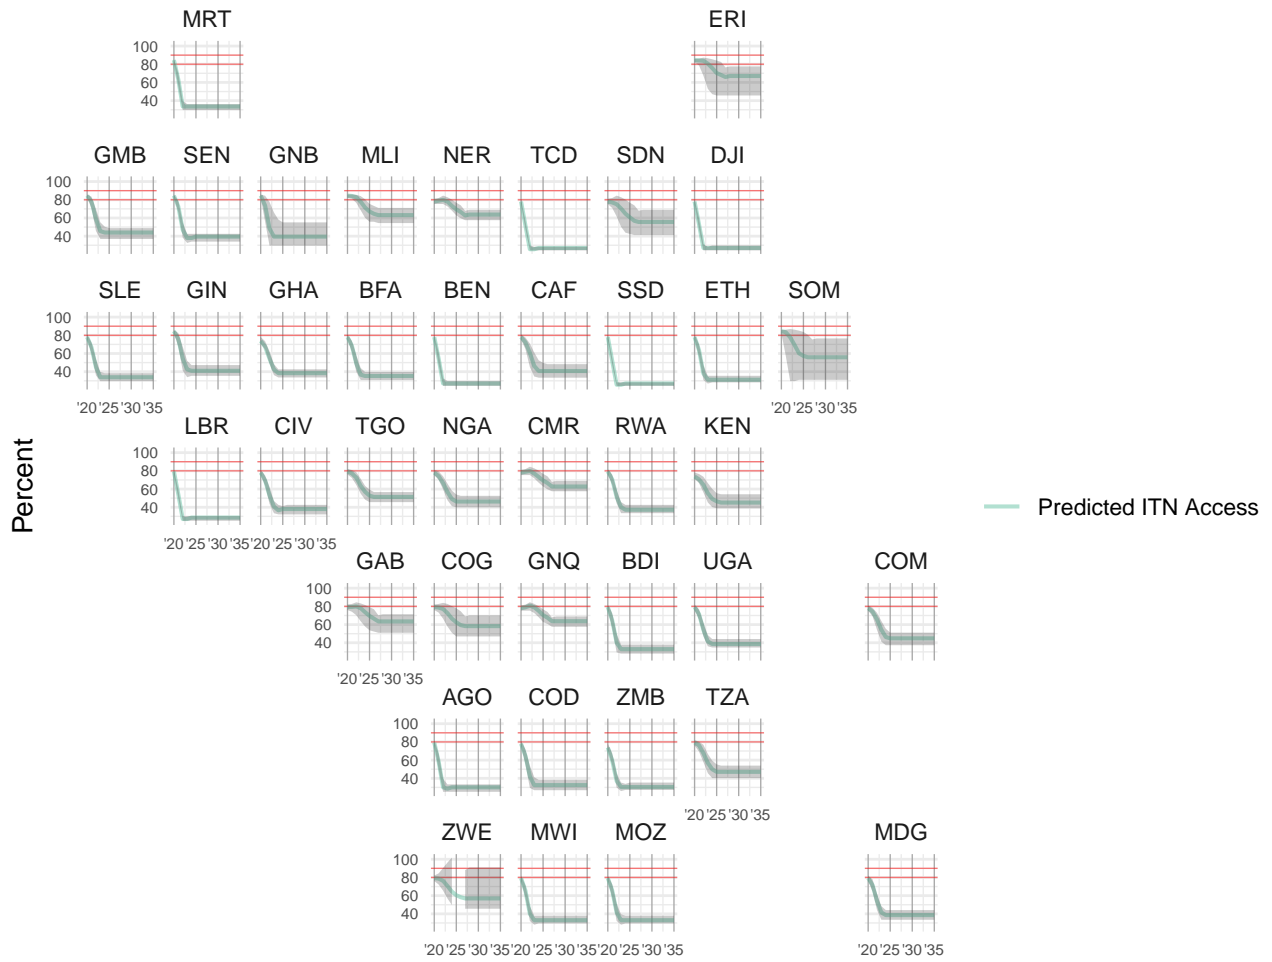

# ANC/EPI at 6% and annual school/community distribution at 7 % of the population

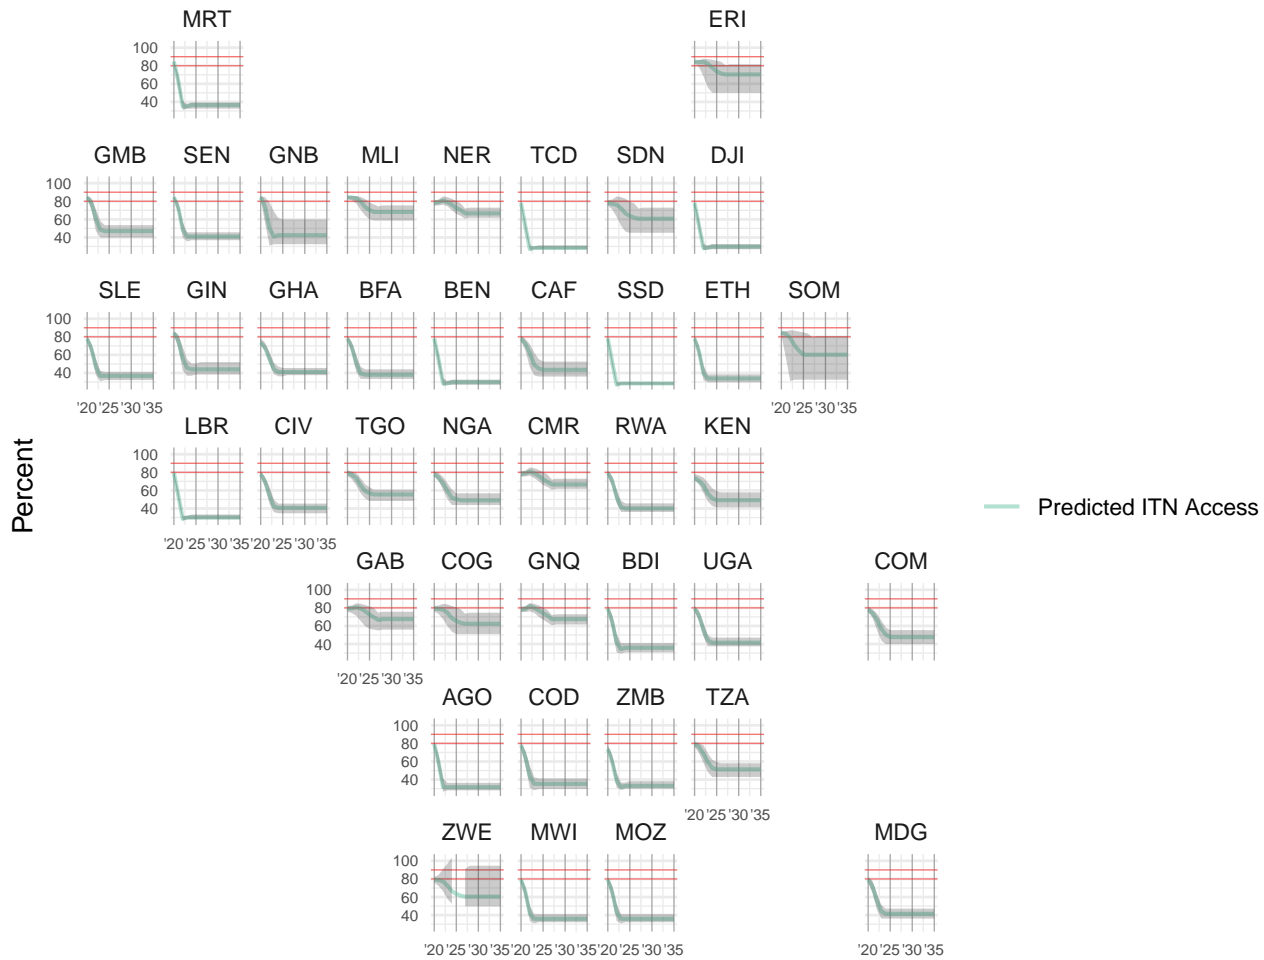

# ANC/EPI at 6% and annual school/community distribution at 8 % of the population

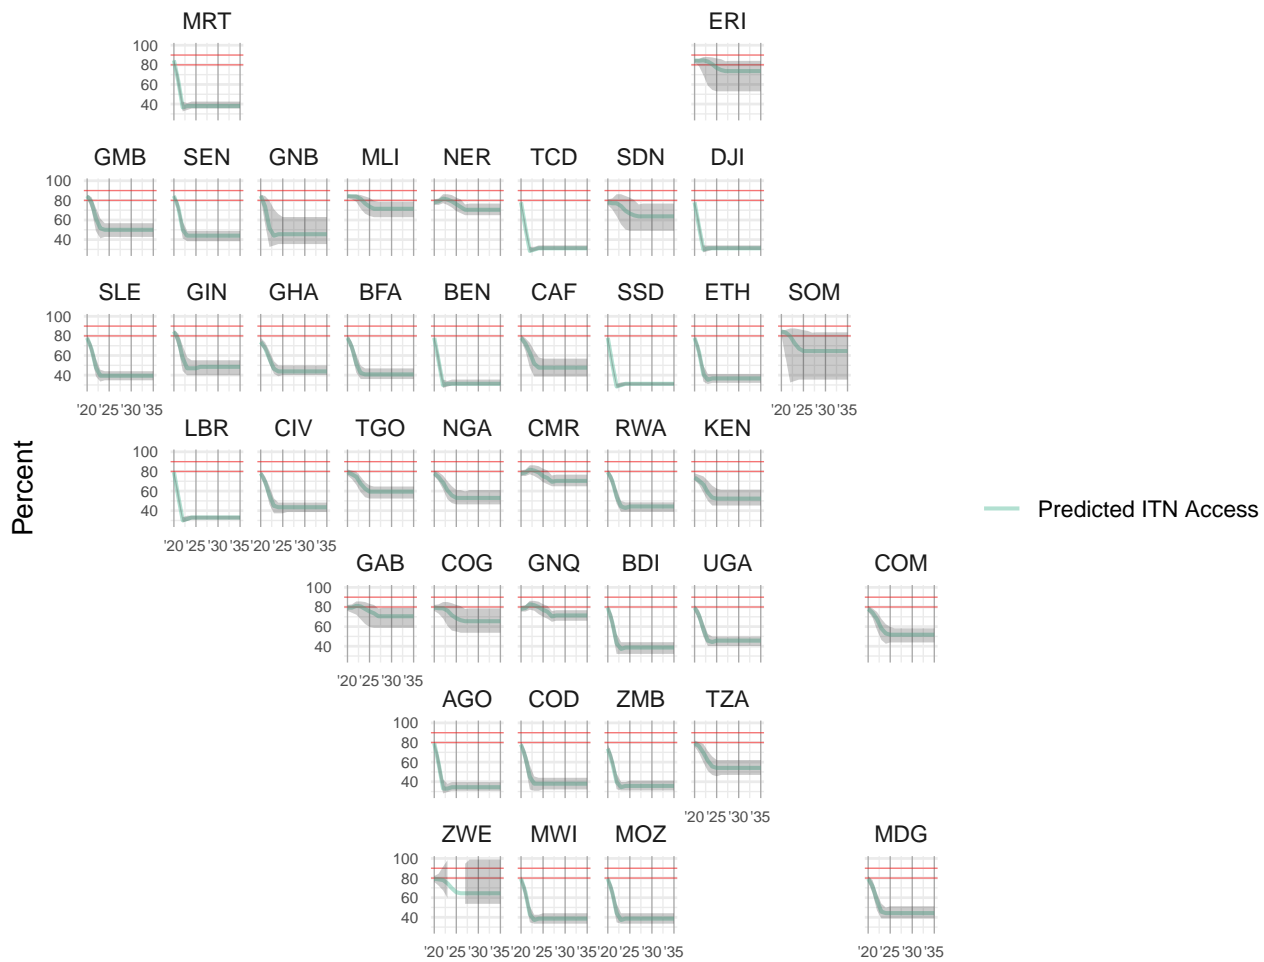

# ANC/EPI at 6% and annual school/community distribution at 9 % of the population

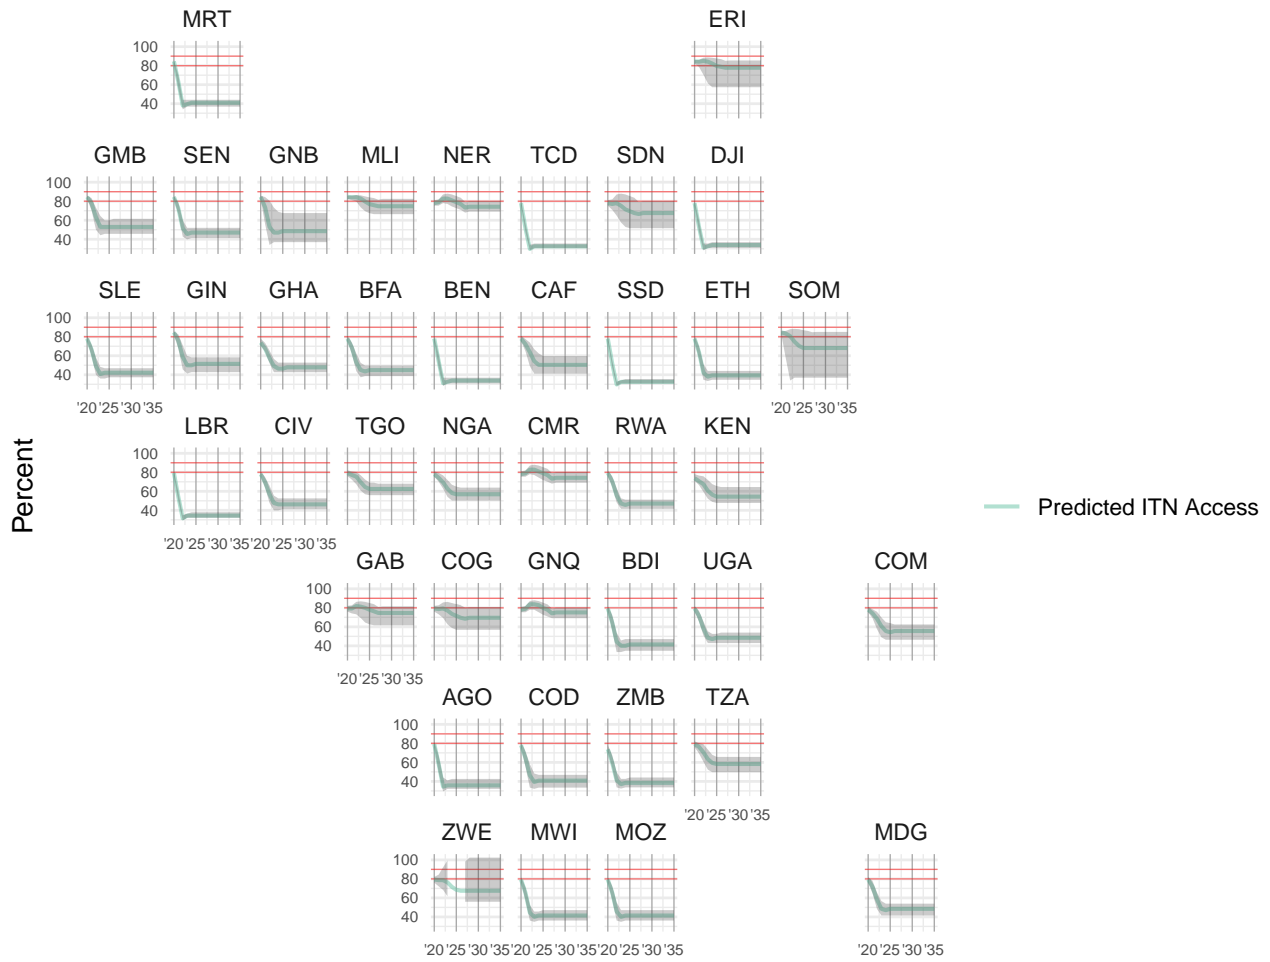

# ANC/EPI at 6% and annual school/community distribution at 10% of the population

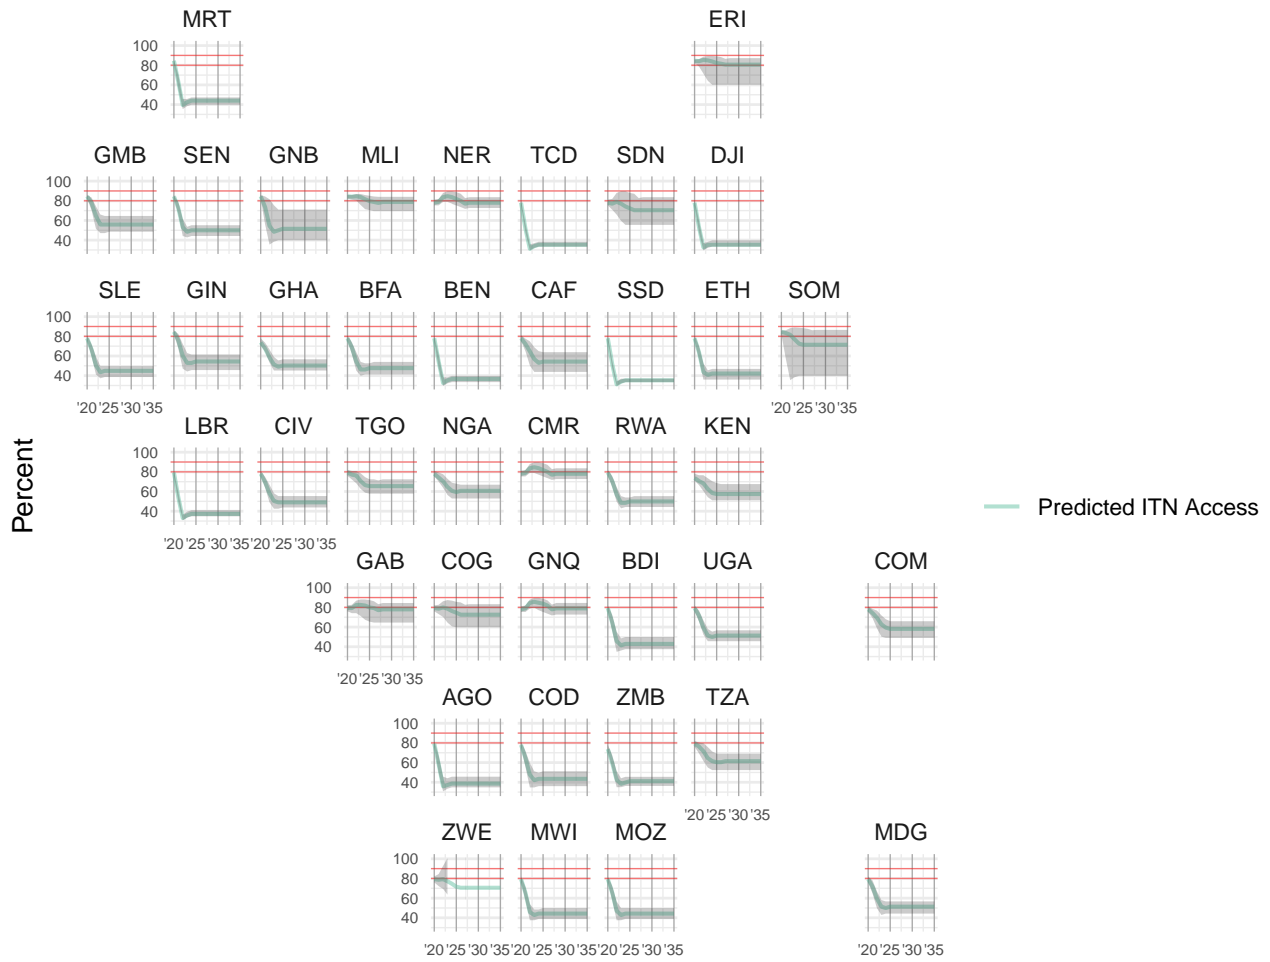

ANC/EPI at 6% and annual school/community distribution at 11 % of the population

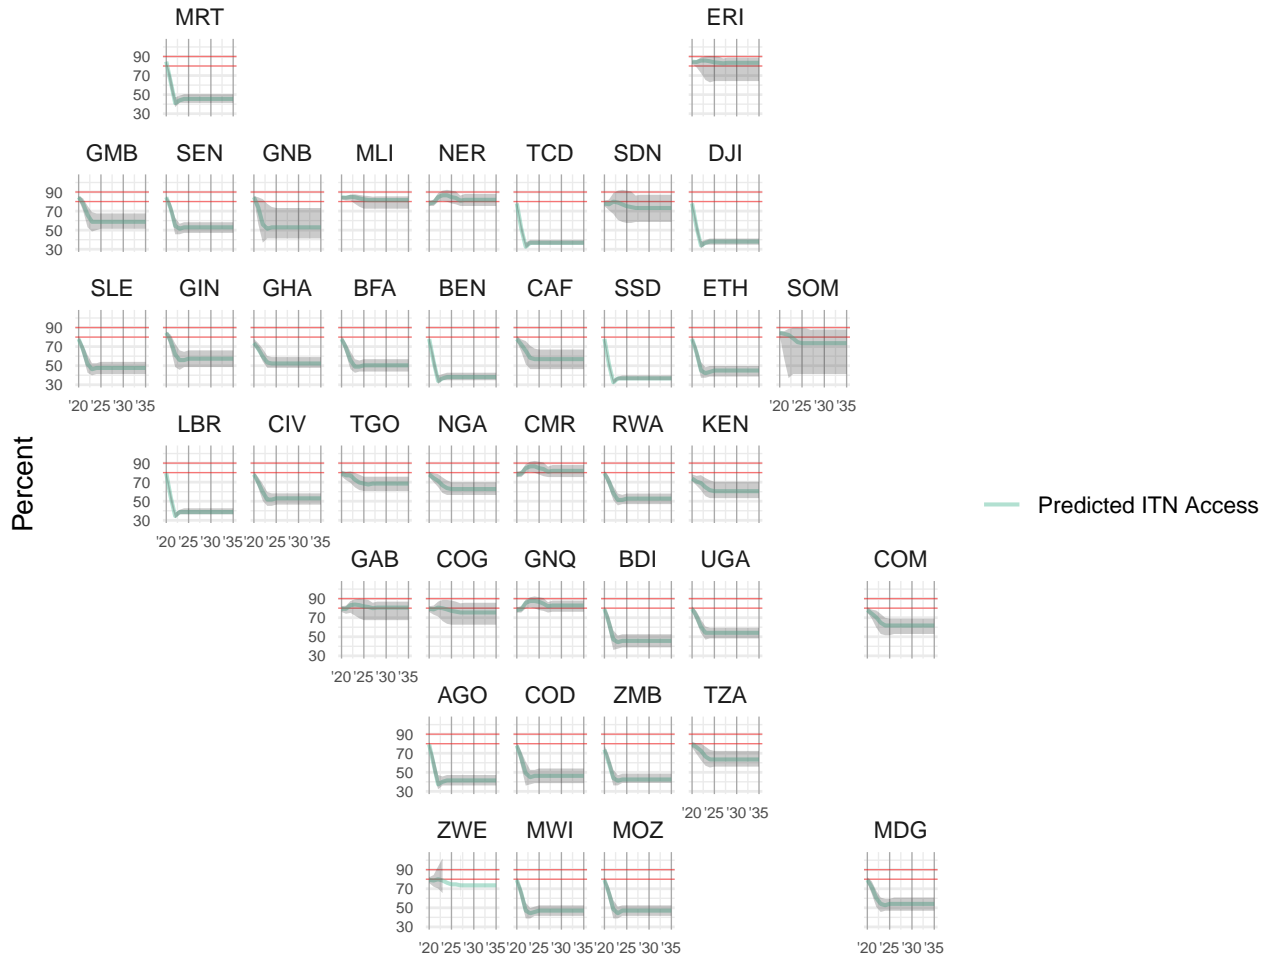



ANC/EPI at 6% and annual school/community distribution at 12 % of the population

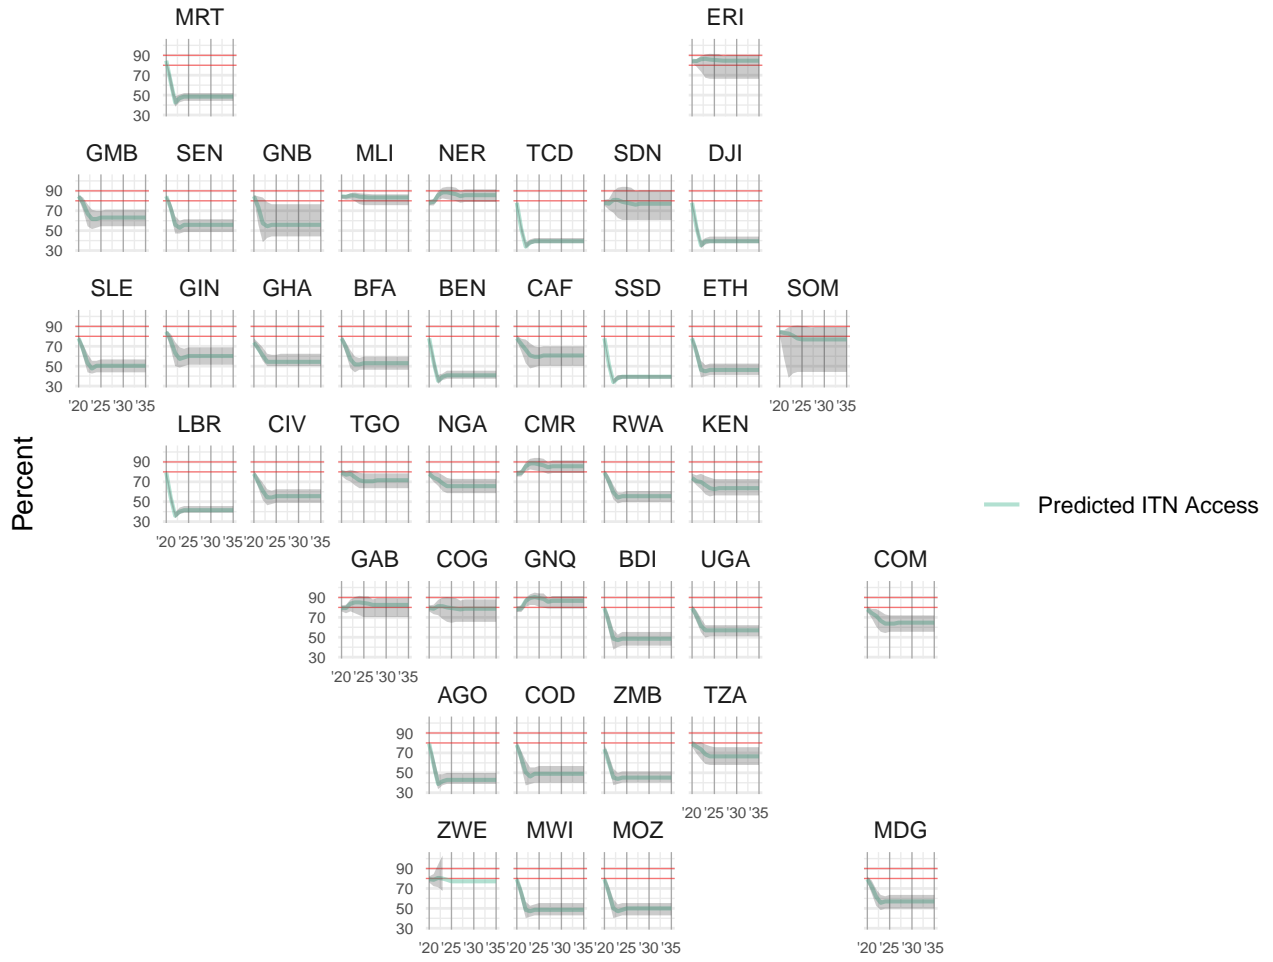

ANC/EPI at 6% and annual school/community distribution at 13 % of the population

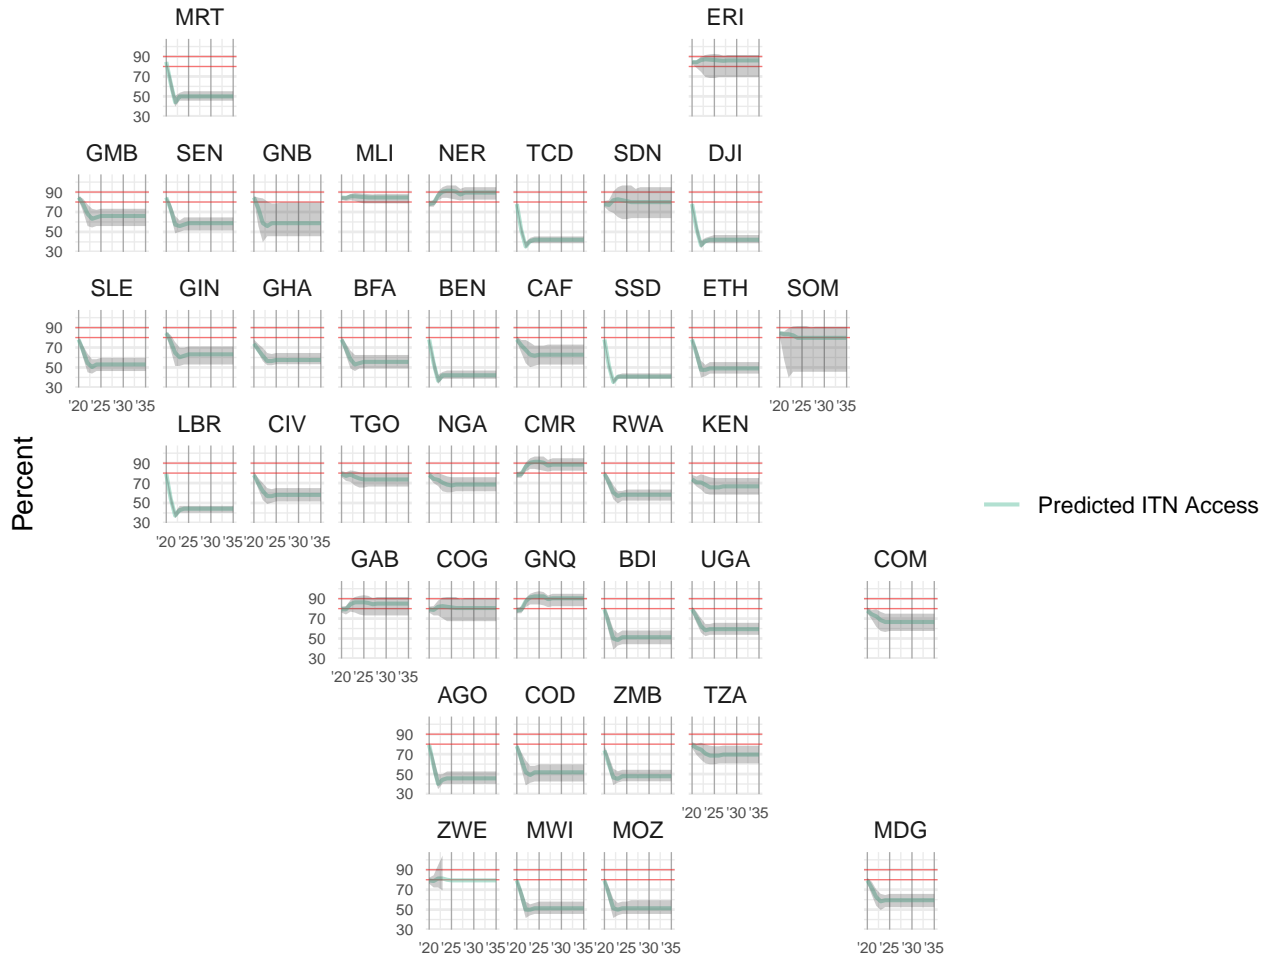

# ANC/EPI at 6% and annual school/community distribution at 14 % of the population

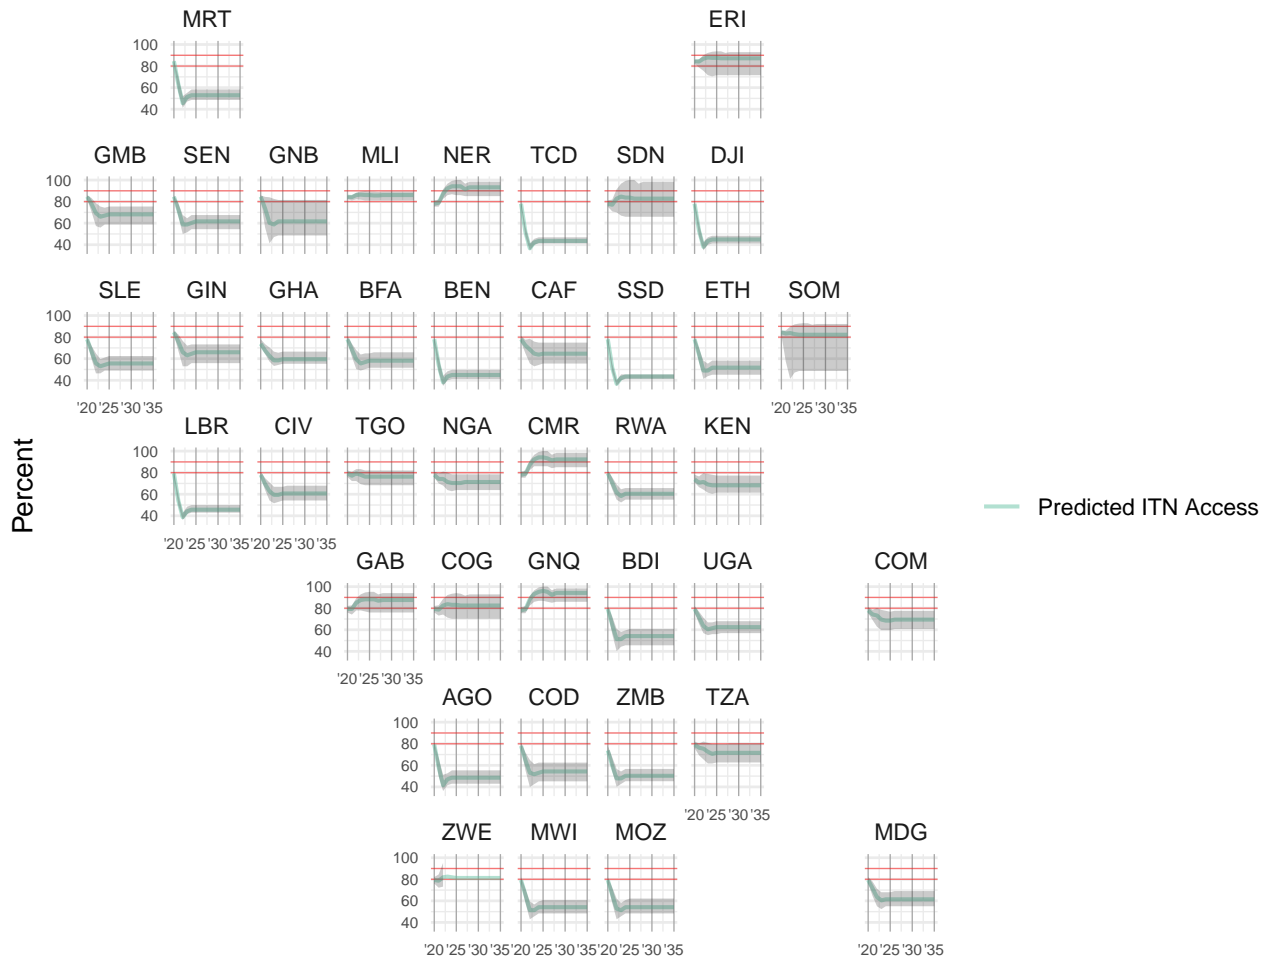

ANC/EPI at 6% and annual school/community distribution at 15 % of the population

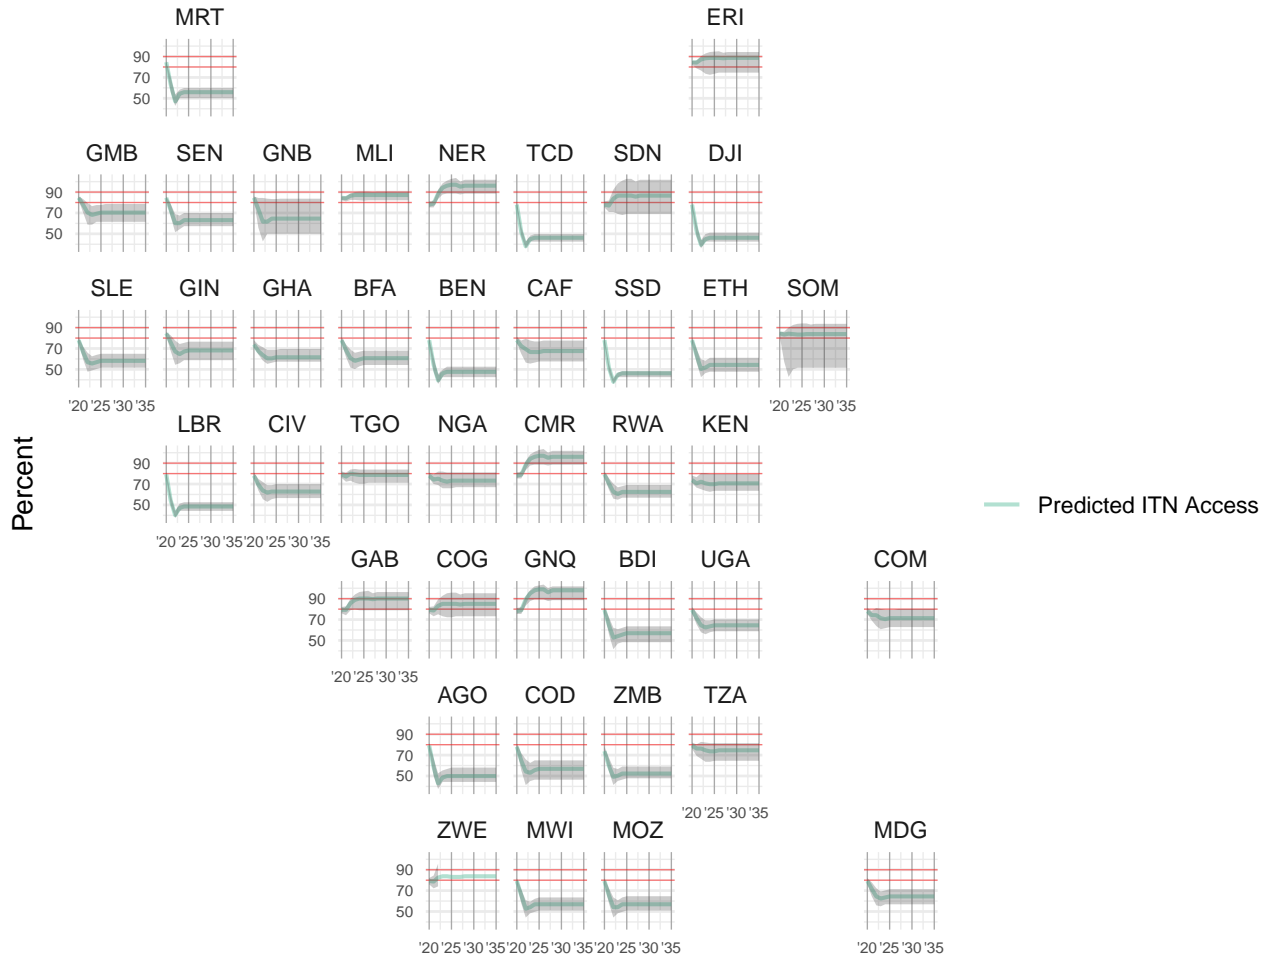

ANC/EPI at 6% and annual school/community distribution at 16 % of the population

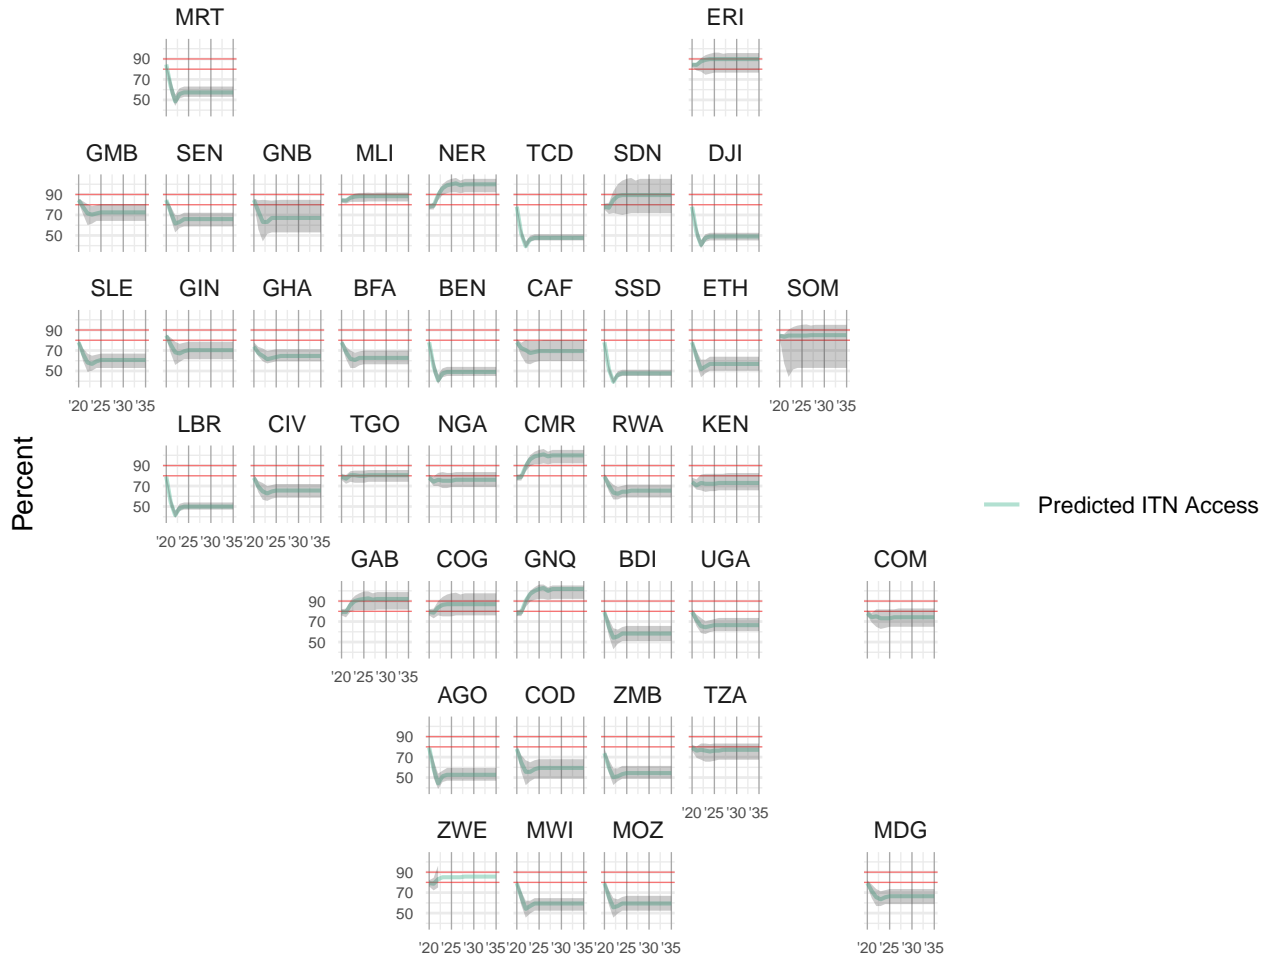

# ANC/EPI at 6% and annual school/community distribution at 17% of the population

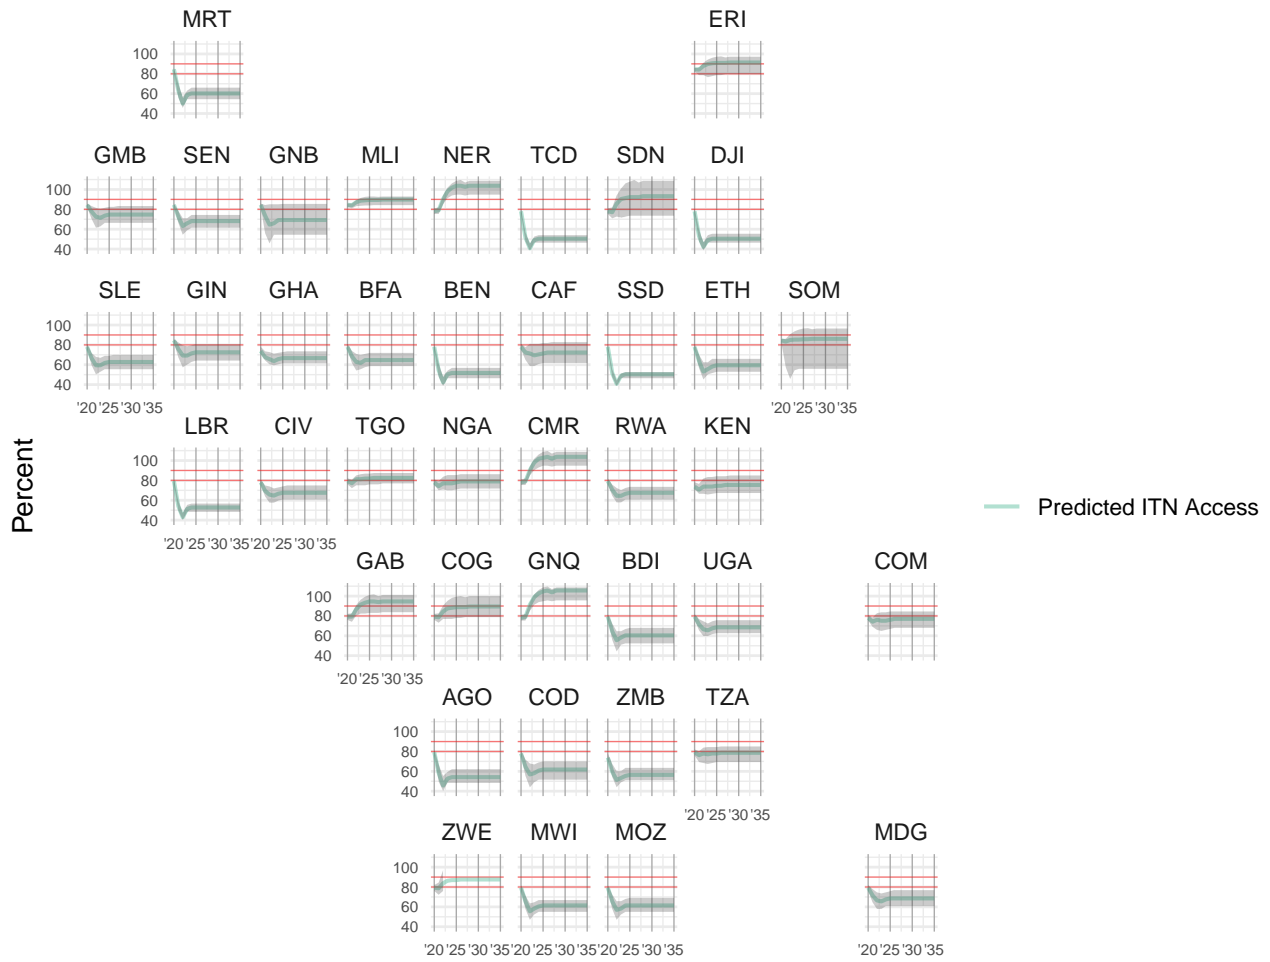

# ANC/EPI at 6% and annual school/community distribution at 18% of the population

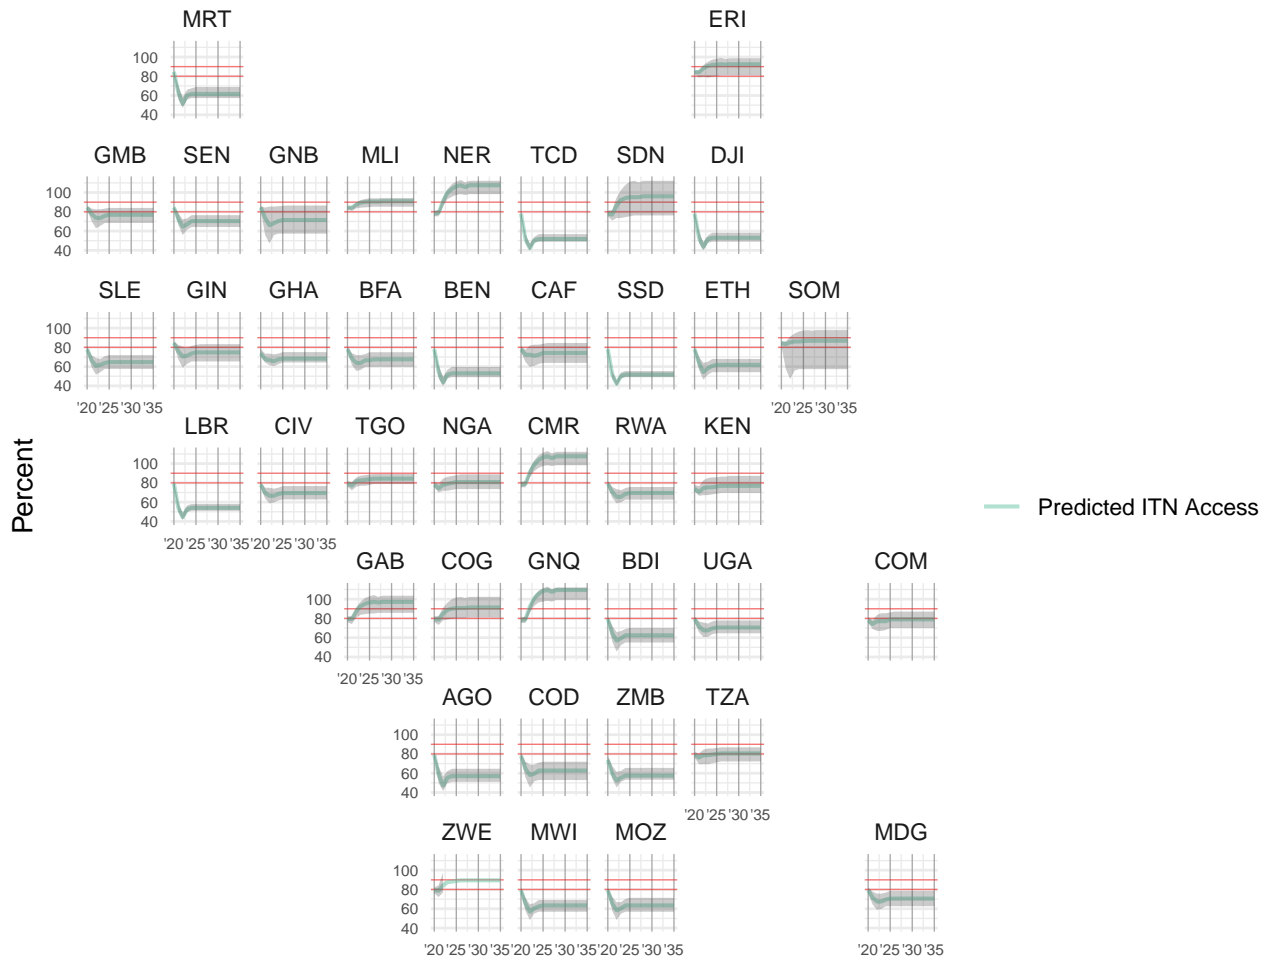

# ANC/EPI at 6% and annual school/community distribution at 19% of the population

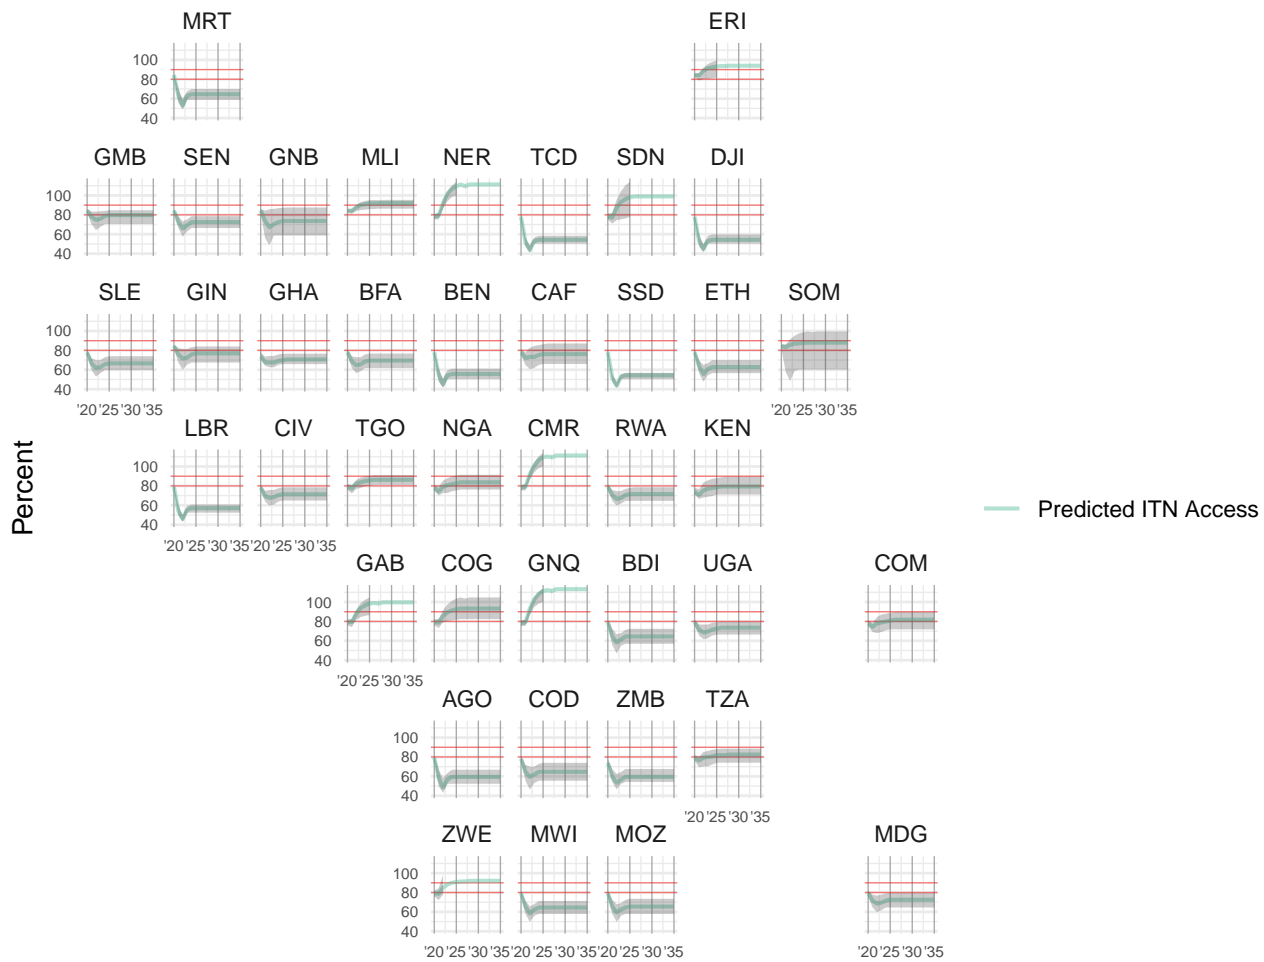



### ANC/EPI at 6% and annual school/community distribution at 20 % of the population

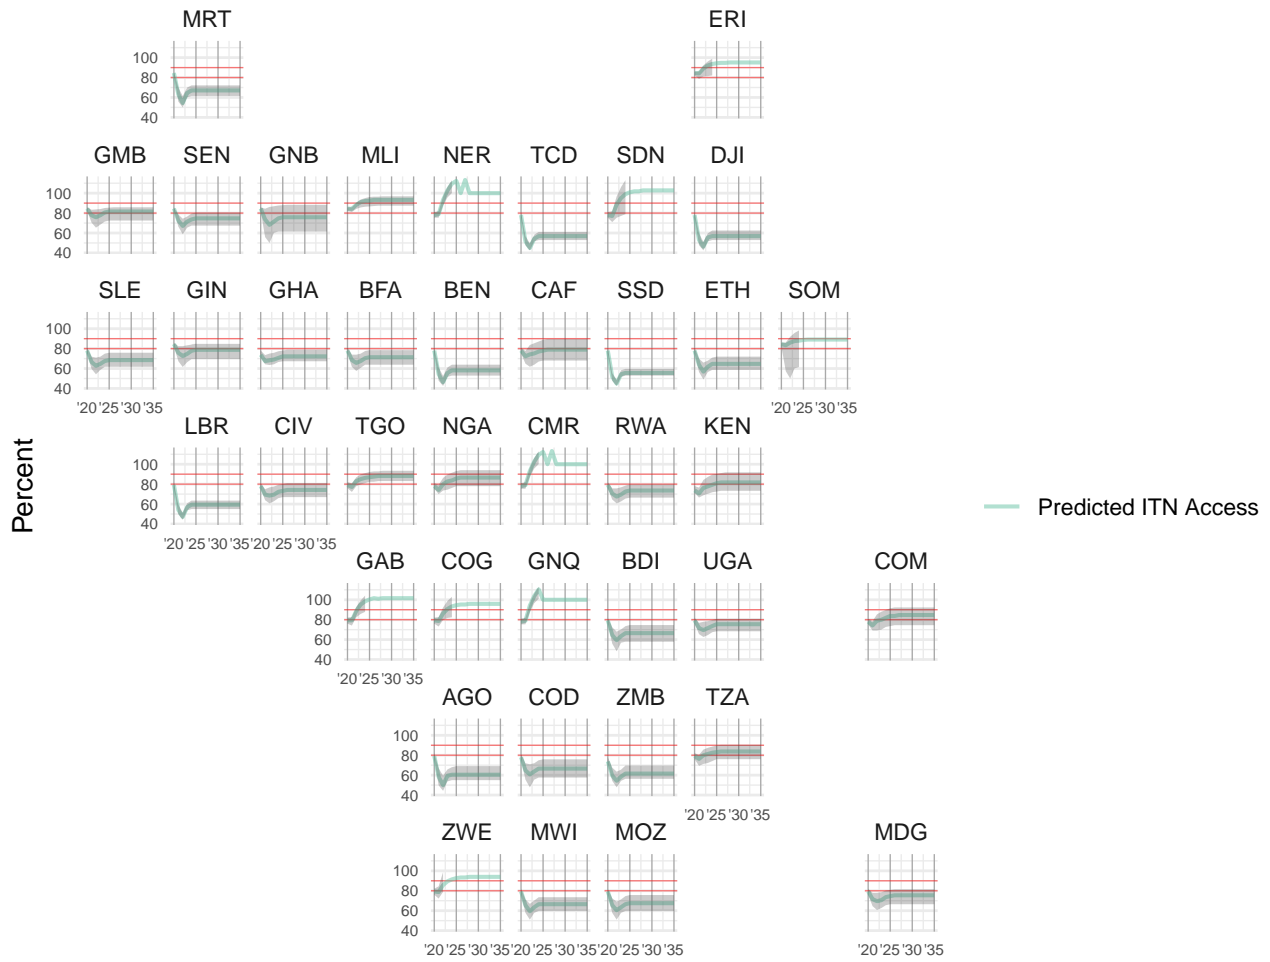

### ANC/EPI at 6% and annual school/community distribution at 21 % of the population

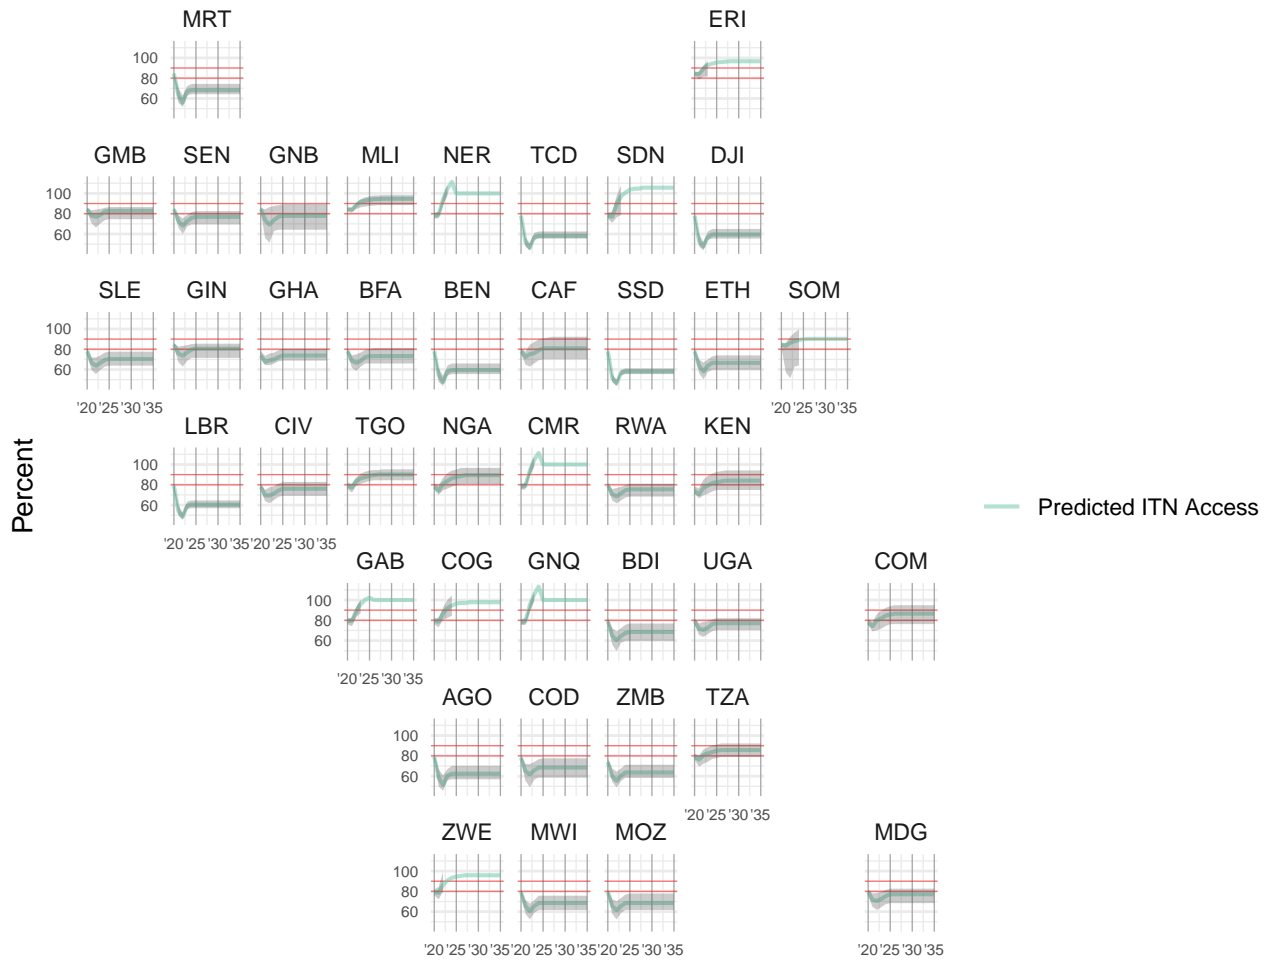

# ANC/EPI at 6% and annual school/community distribution at 22 % of the population

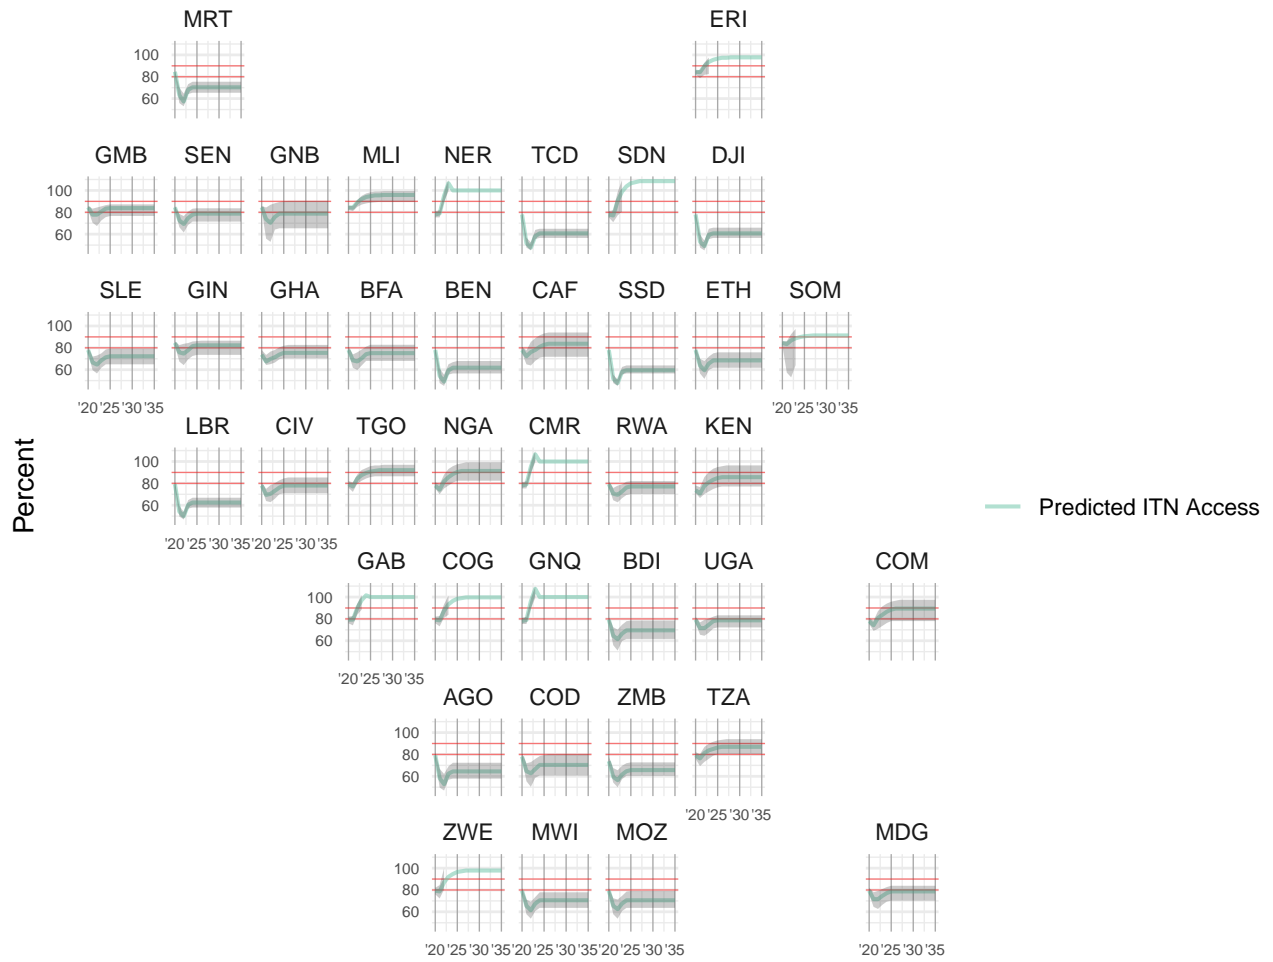

# ANC/EPI at 6% and annual school/community distribution at 23 % of the population

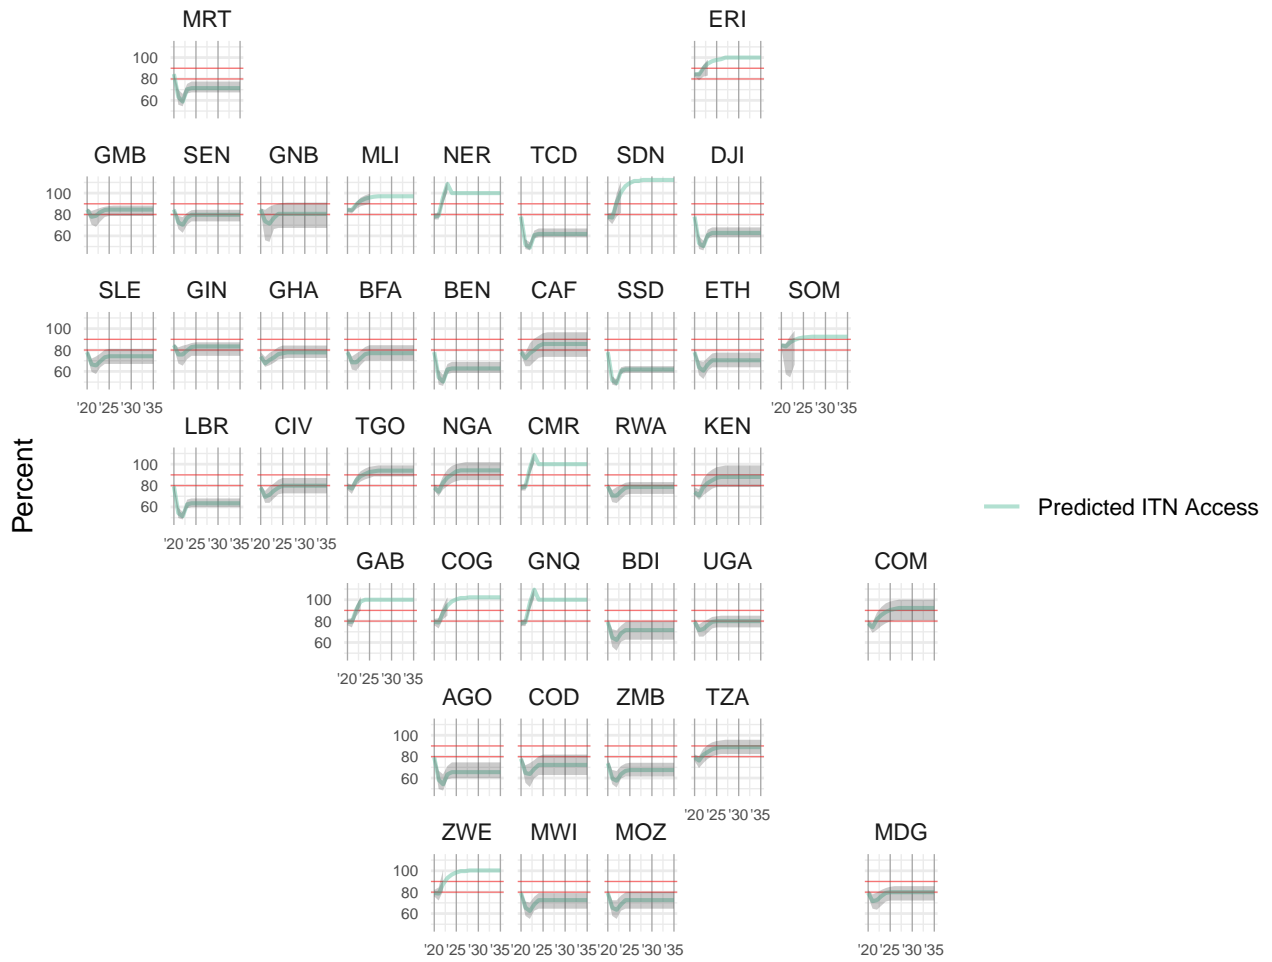

# ANC/EPI at 6% and annual school/community distribution at 24 % of the population

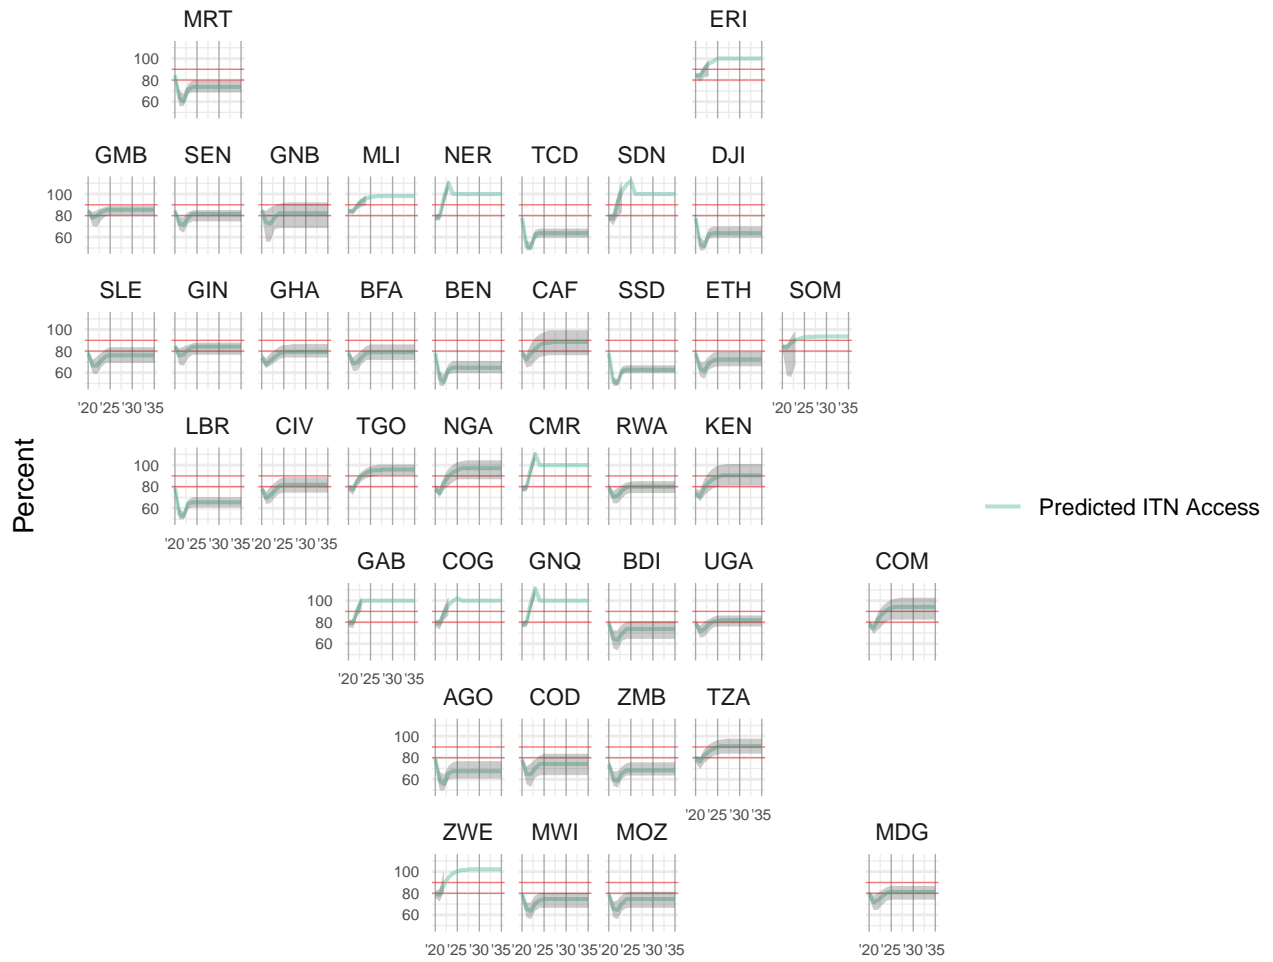

# ANC/EPI at 6% and annual school/community distribution at 25% of the population

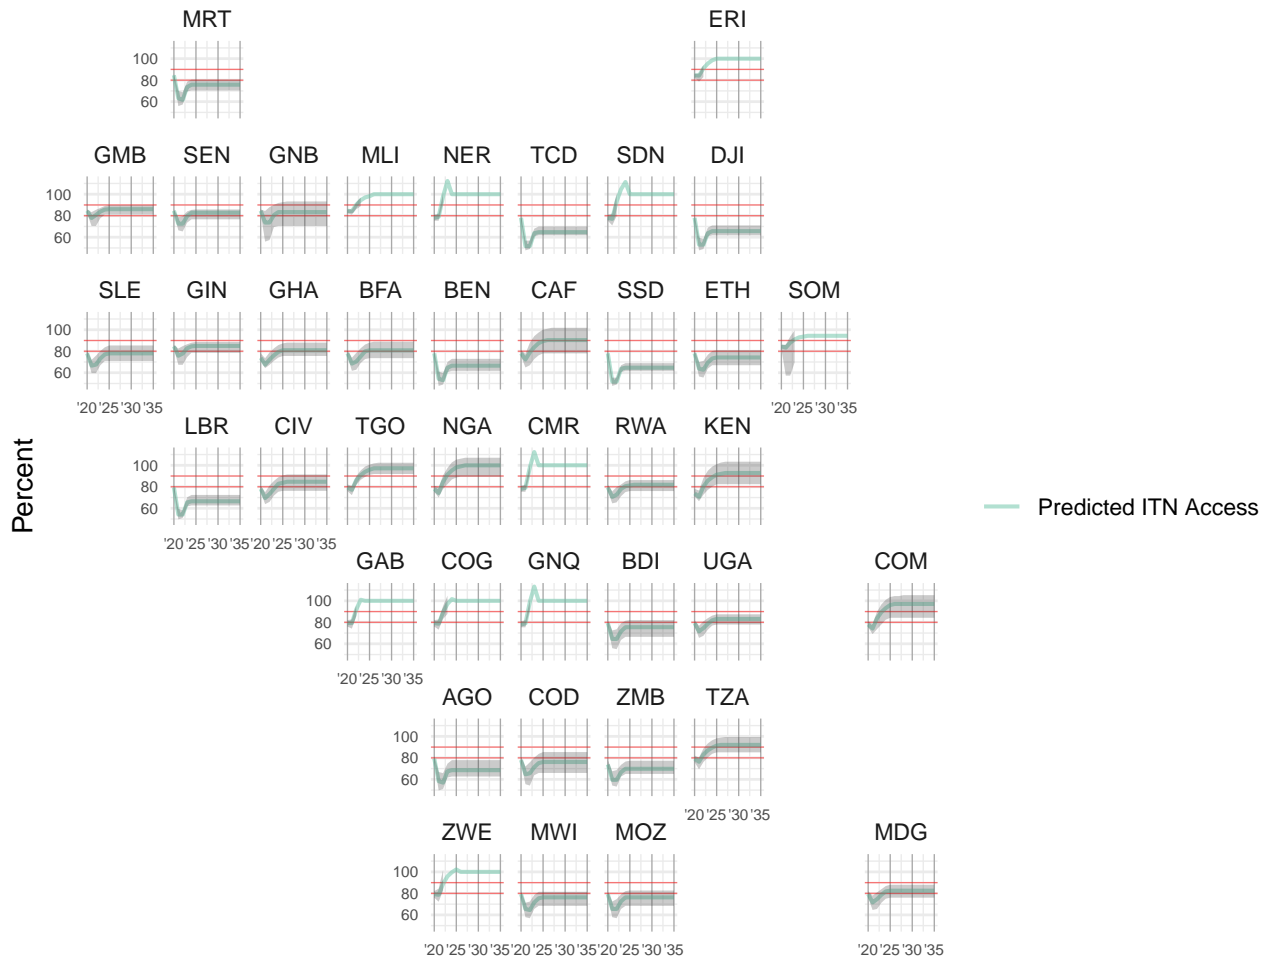

# ANC/EPI at 6% and annual school/community distribution at 26 % of the population

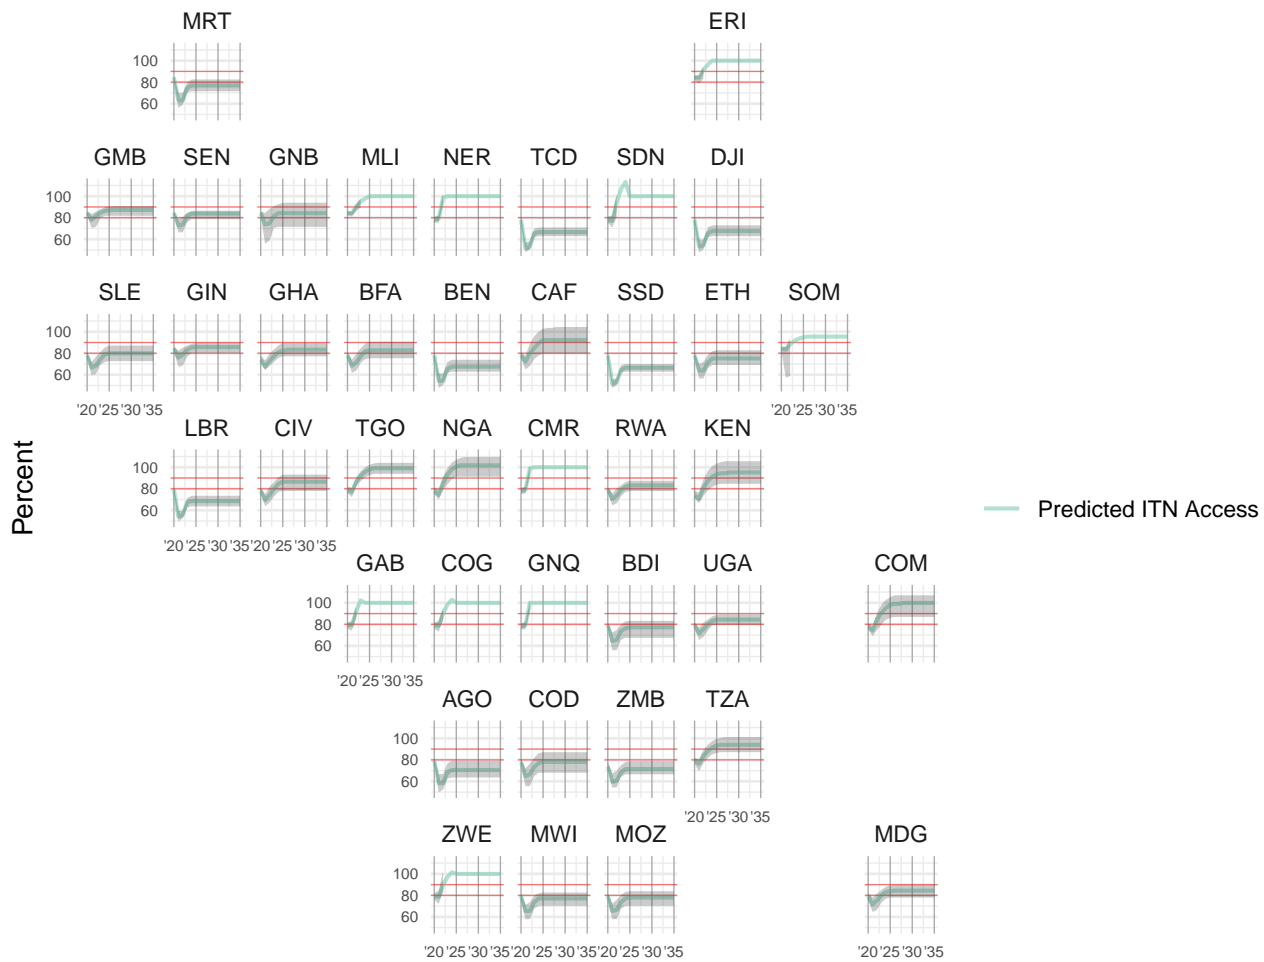

# ANC/EPI at 6% and annual school/community distribution at 27 % of the population

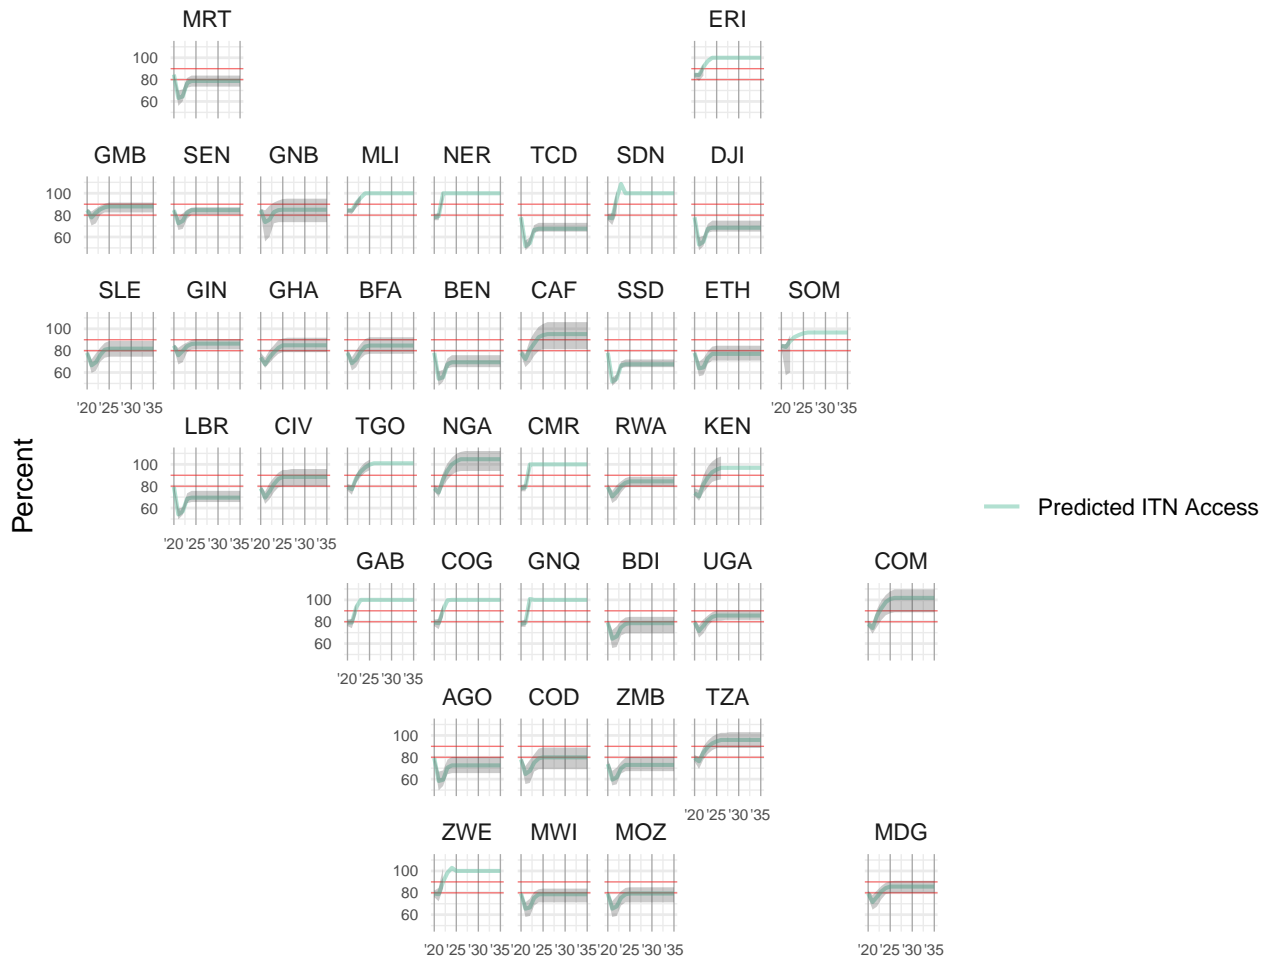



# ANC/EPI at 6% and annual school/community distribution at 28 % of the population

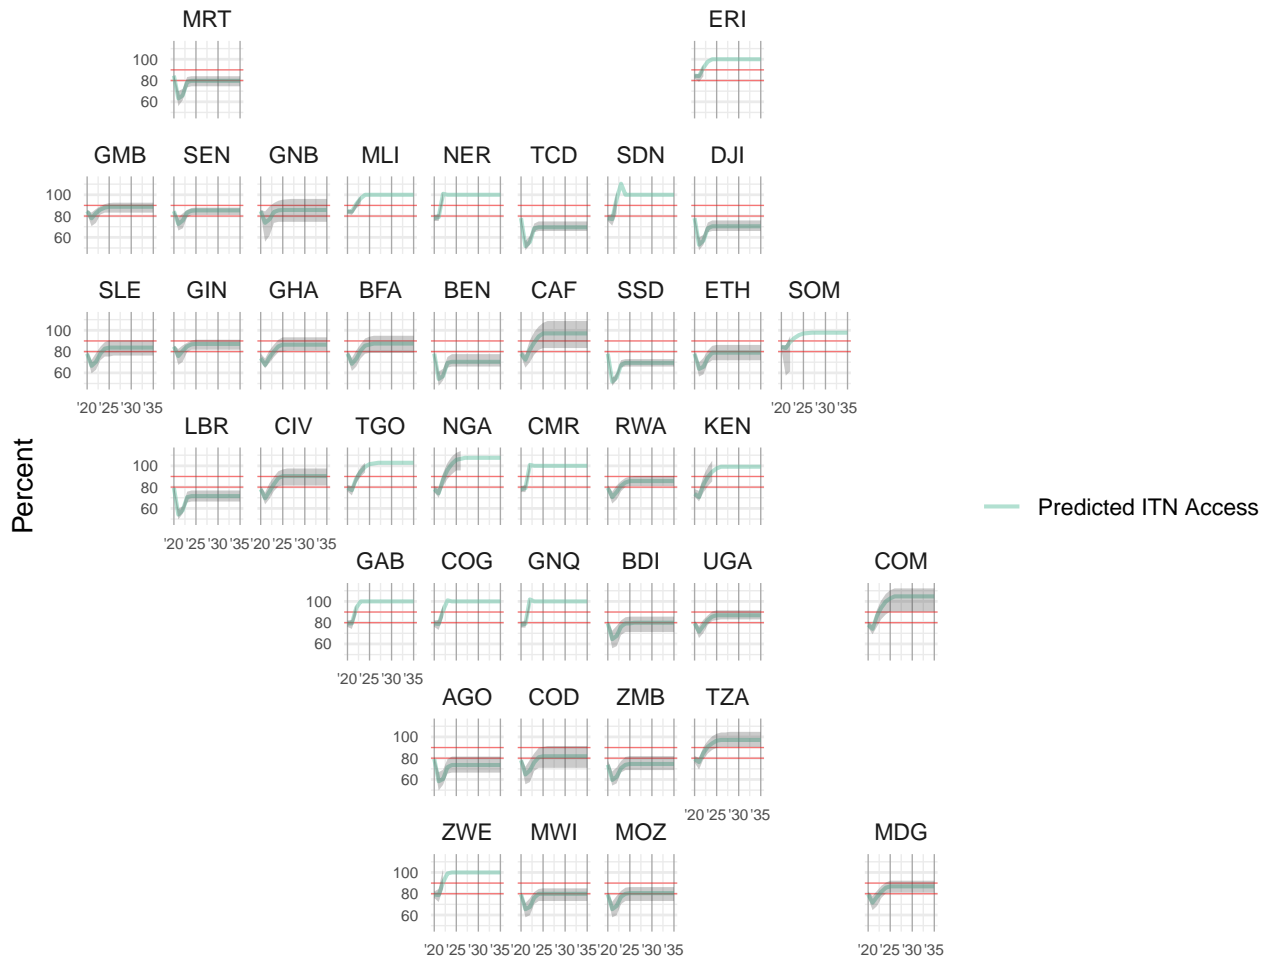

# ANC/EPI at 6% and annual school/community distribution at 29 % of the population

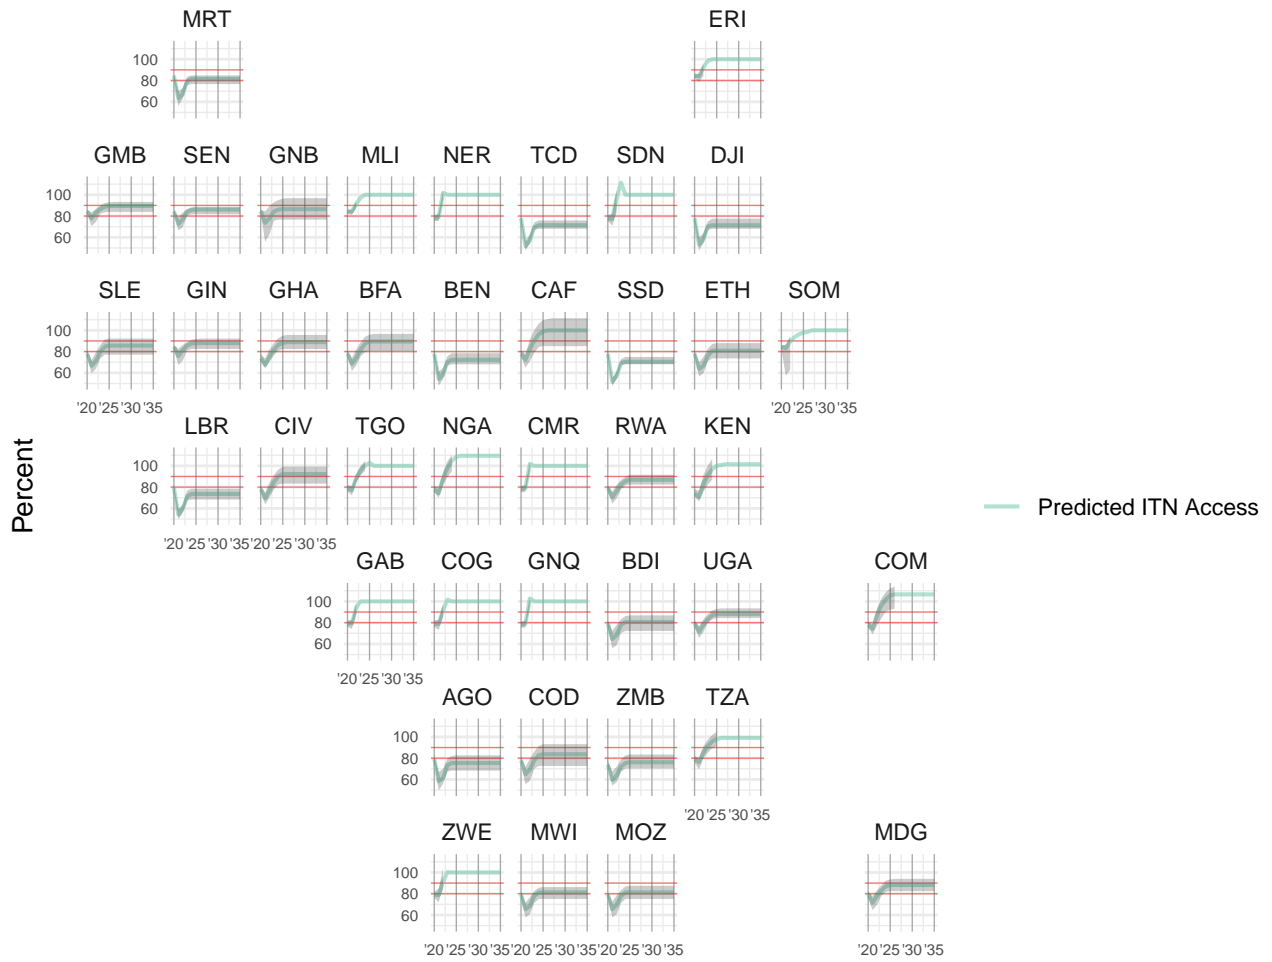

# ANC/EPI at 6% and annual school/community distribution at 30 % of the population

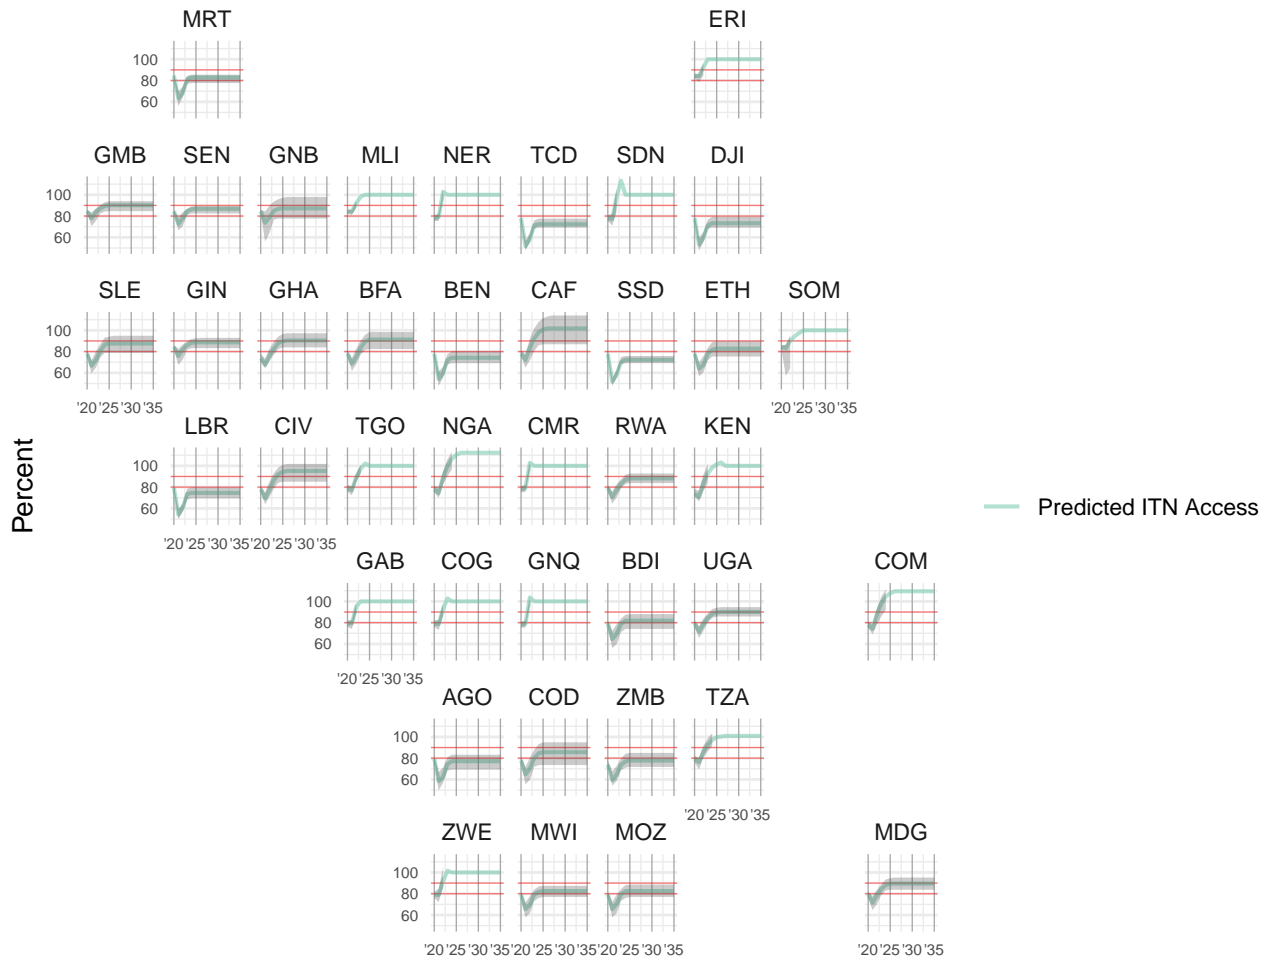

# ANC/EPI at 6% and annual school/community distribution at 31 % of the population

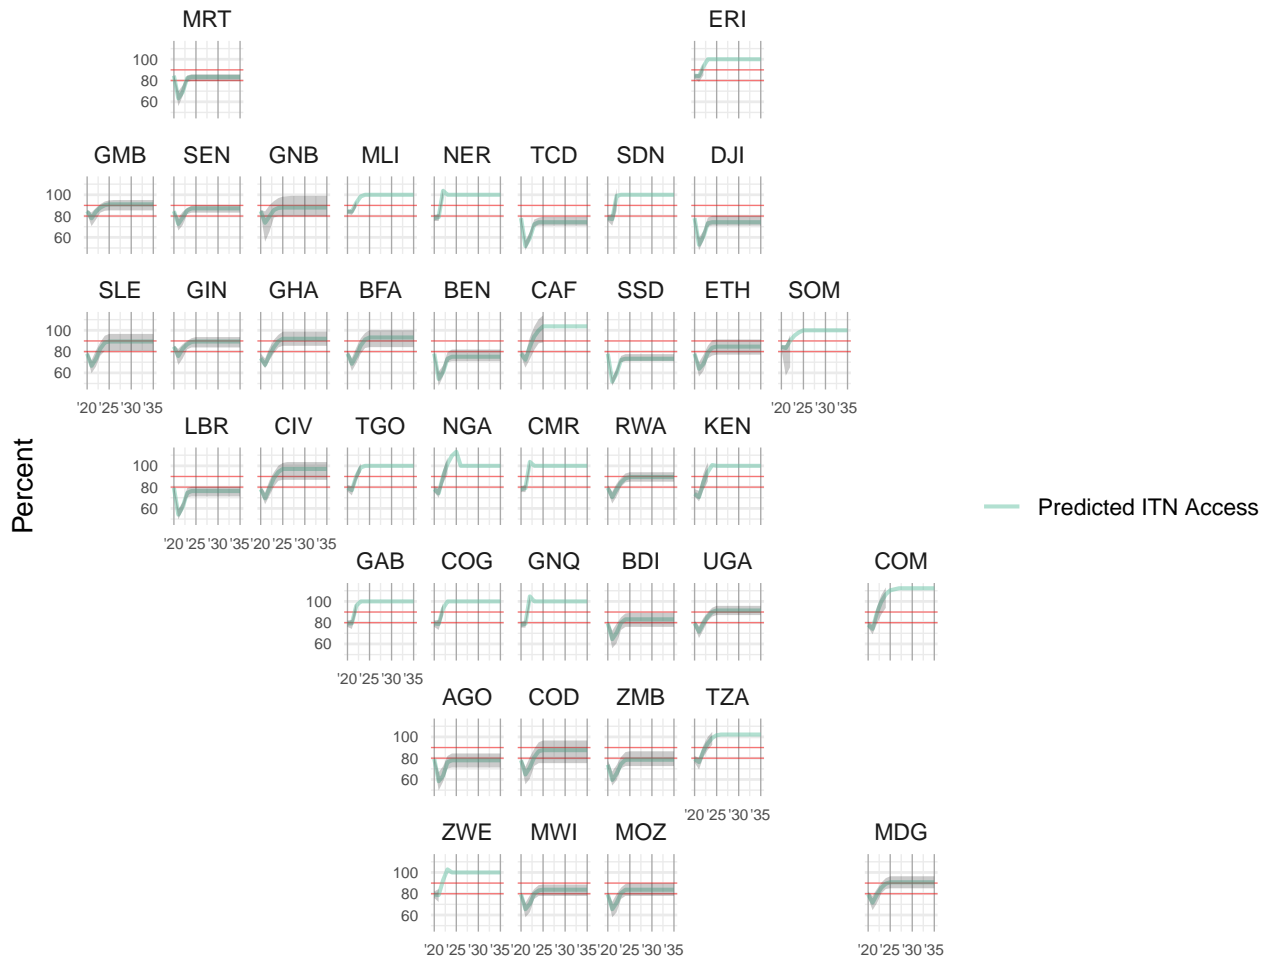

# ANC/EPI at 6% and annual school/community distribution at 32 % of the population

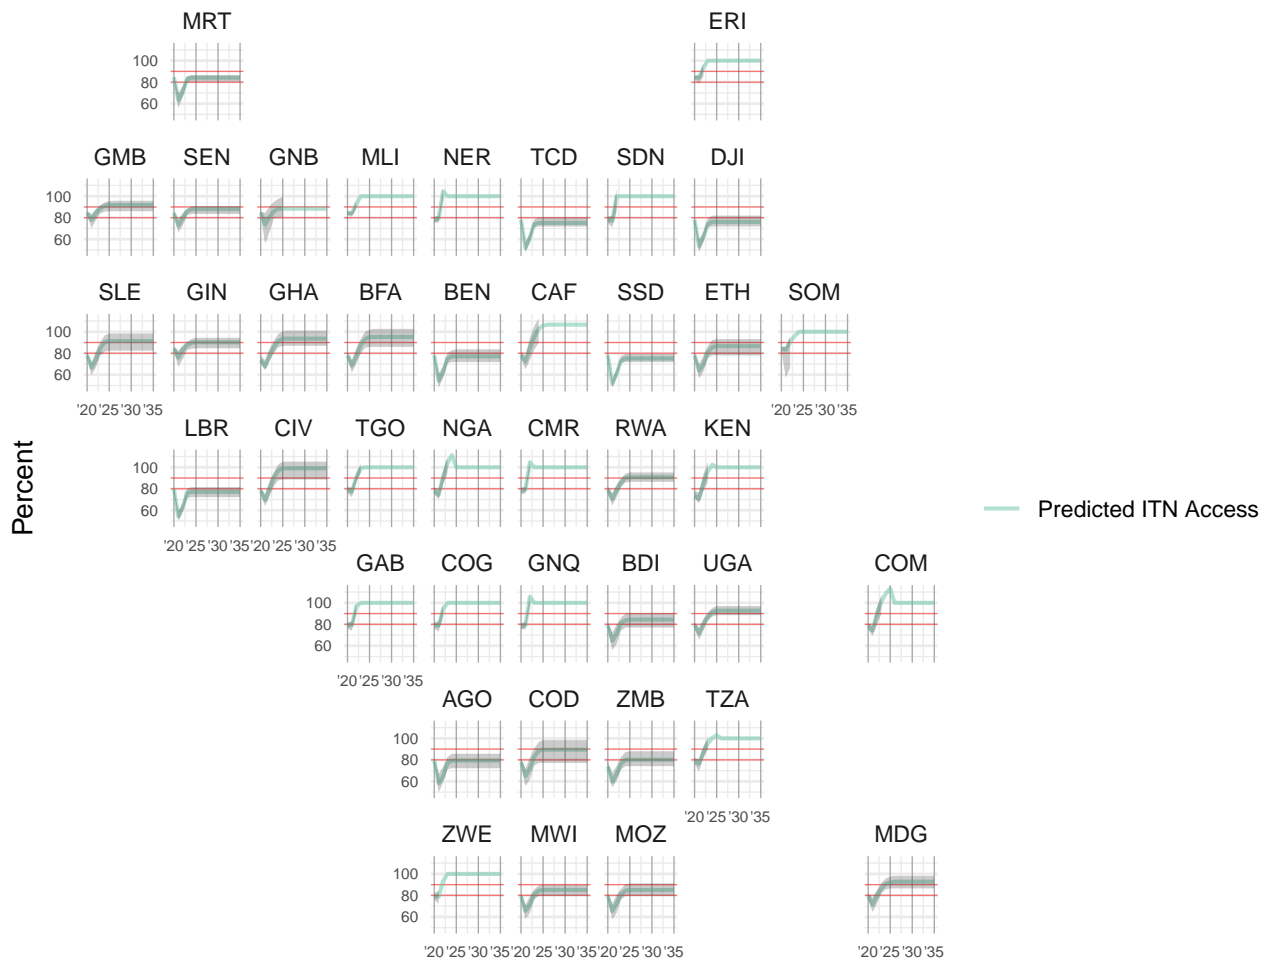

# ANC/EPI at 6% and annual school/community distribution at 33 % of the population

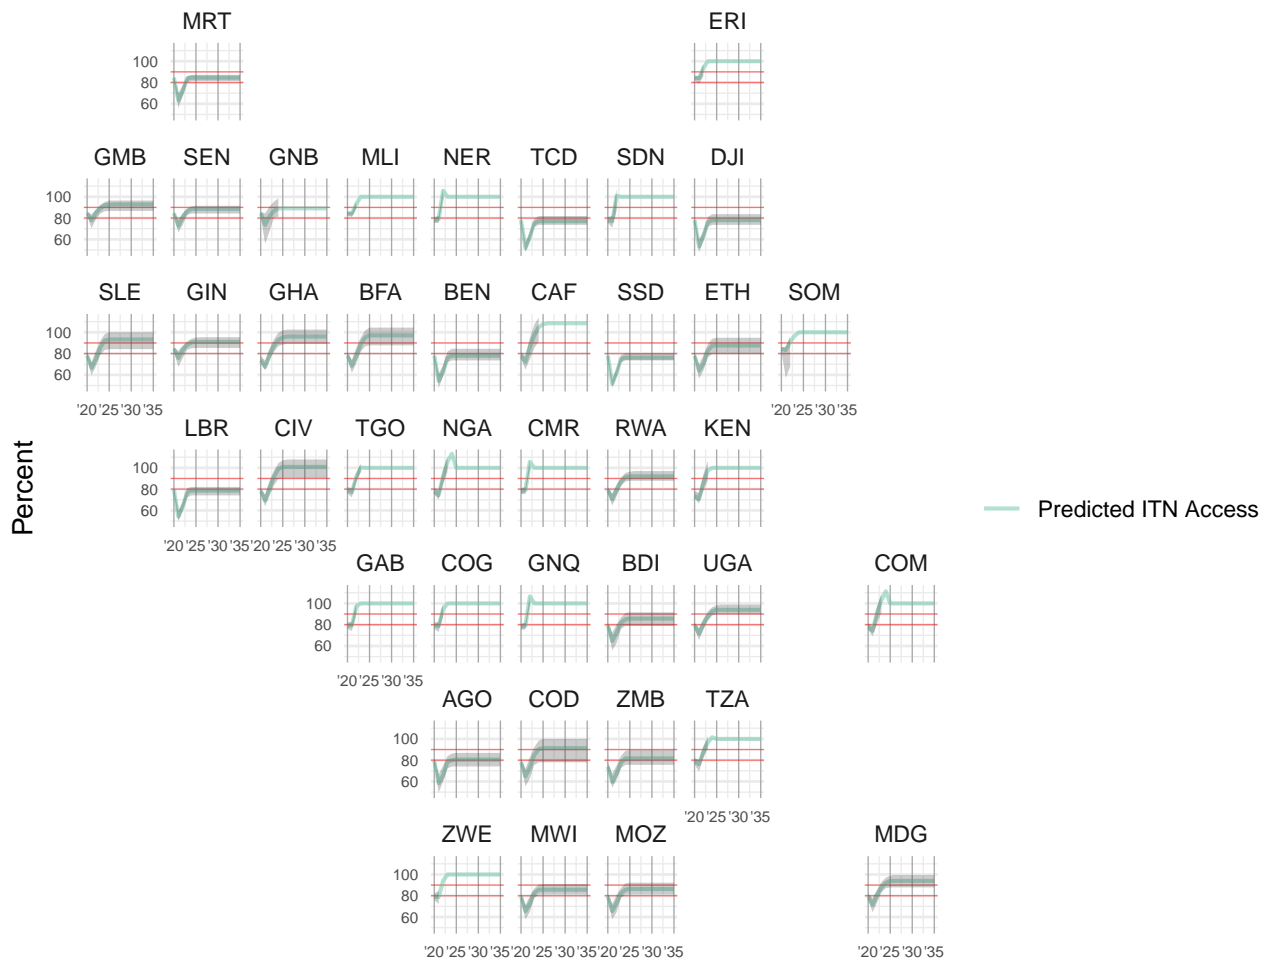

# ANC/EPI at 6% and annual school/community distribution at 34 % of the population

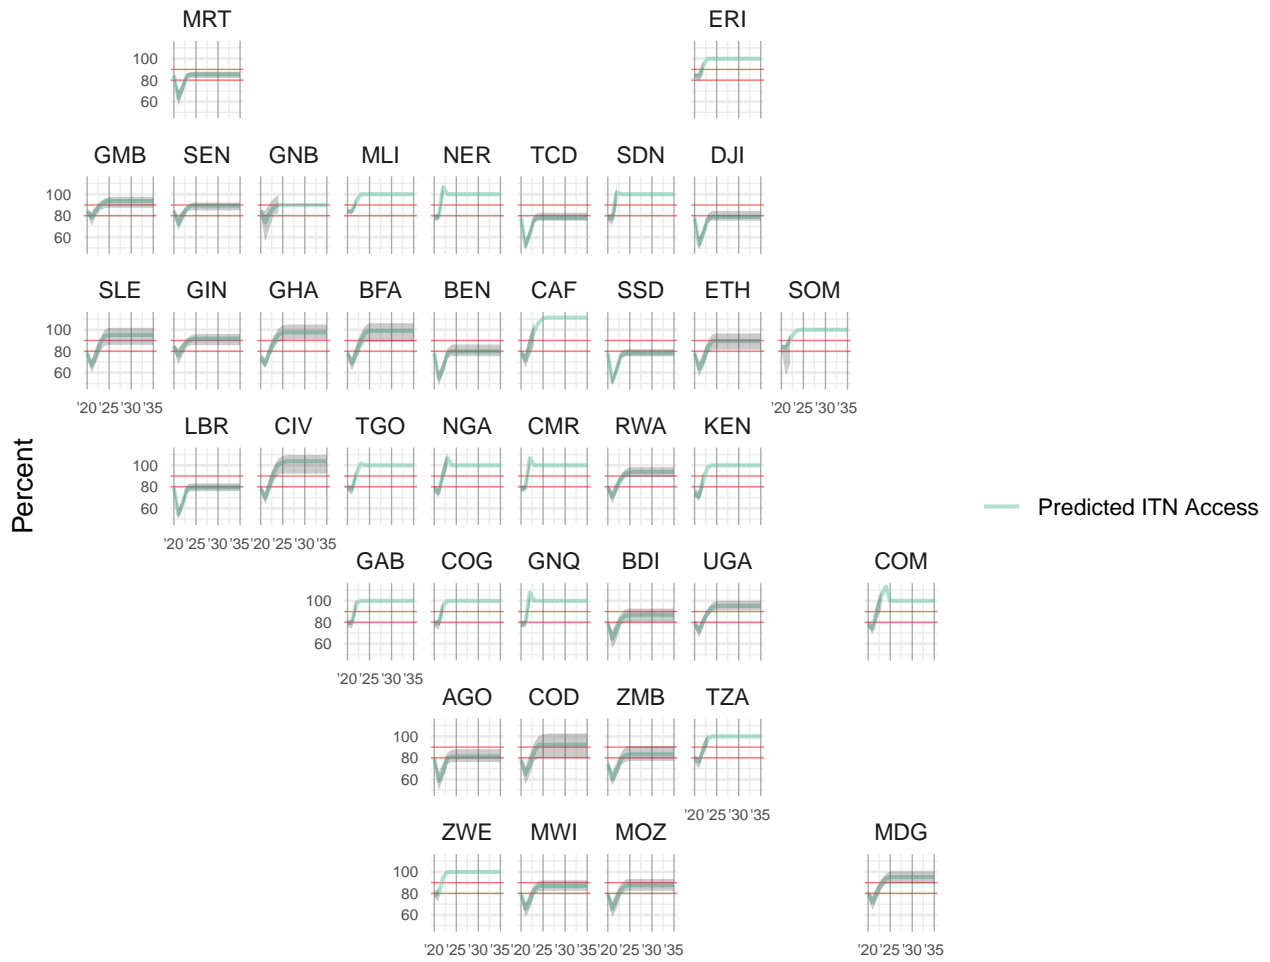

# ANC/EPI at 6% and annual school/community distribution at 35% of the population

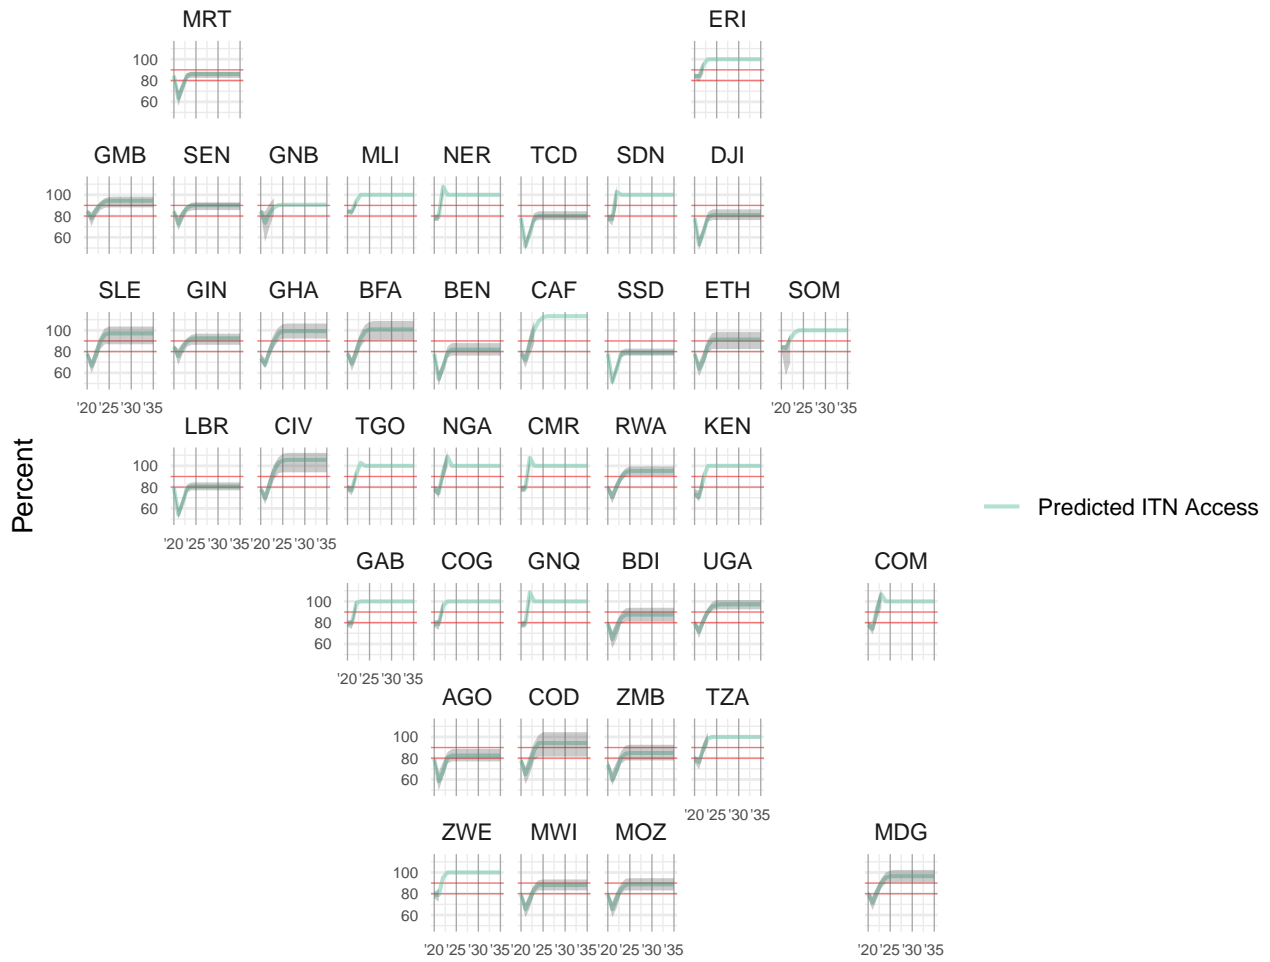



# ANC/EPI at 6% and annual school/community distribution at 36 % of the population

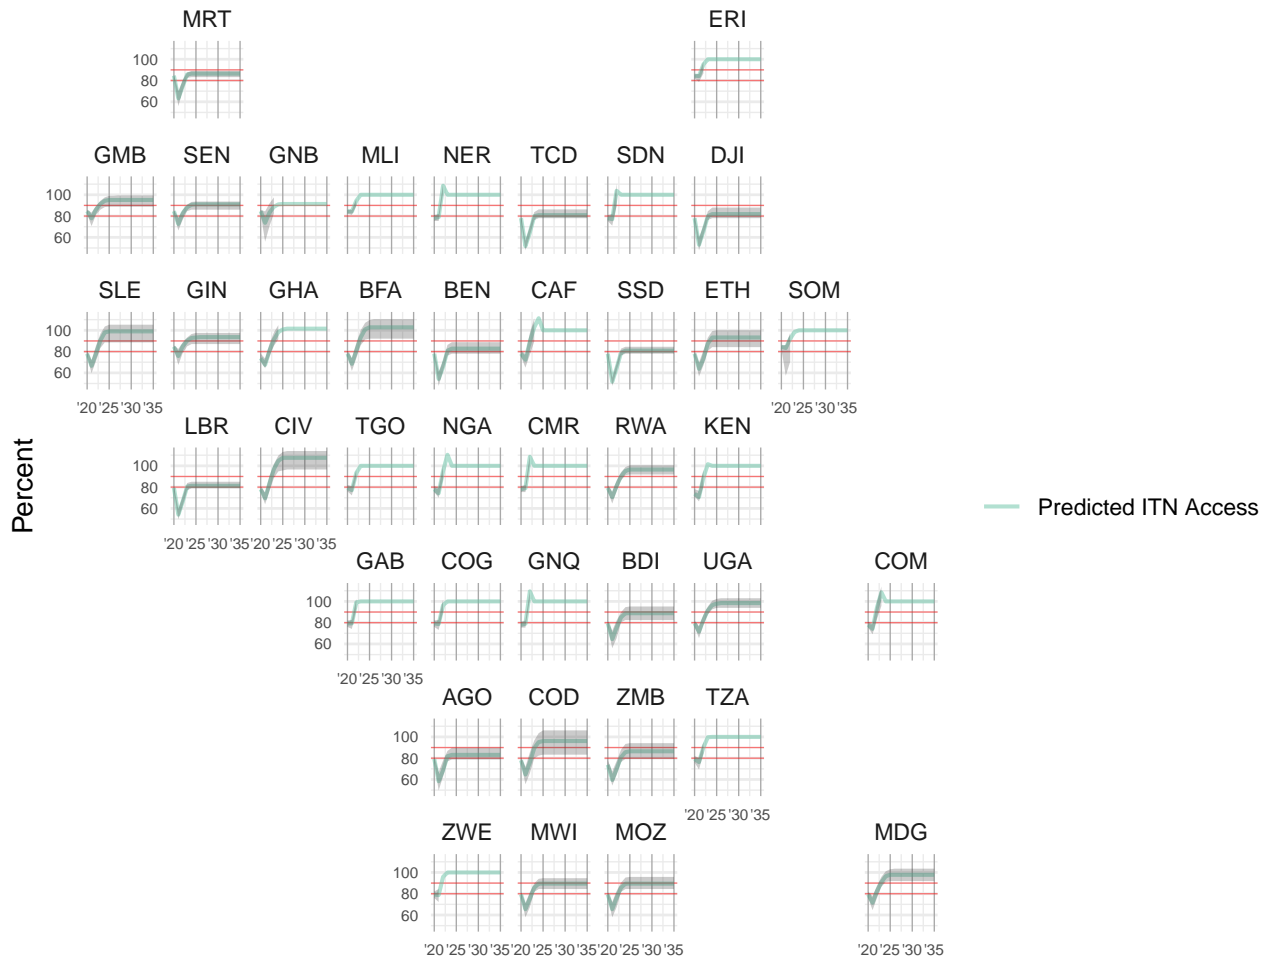

# ANC/EPI at 6% and annual school/community distribution at 37 % of the population

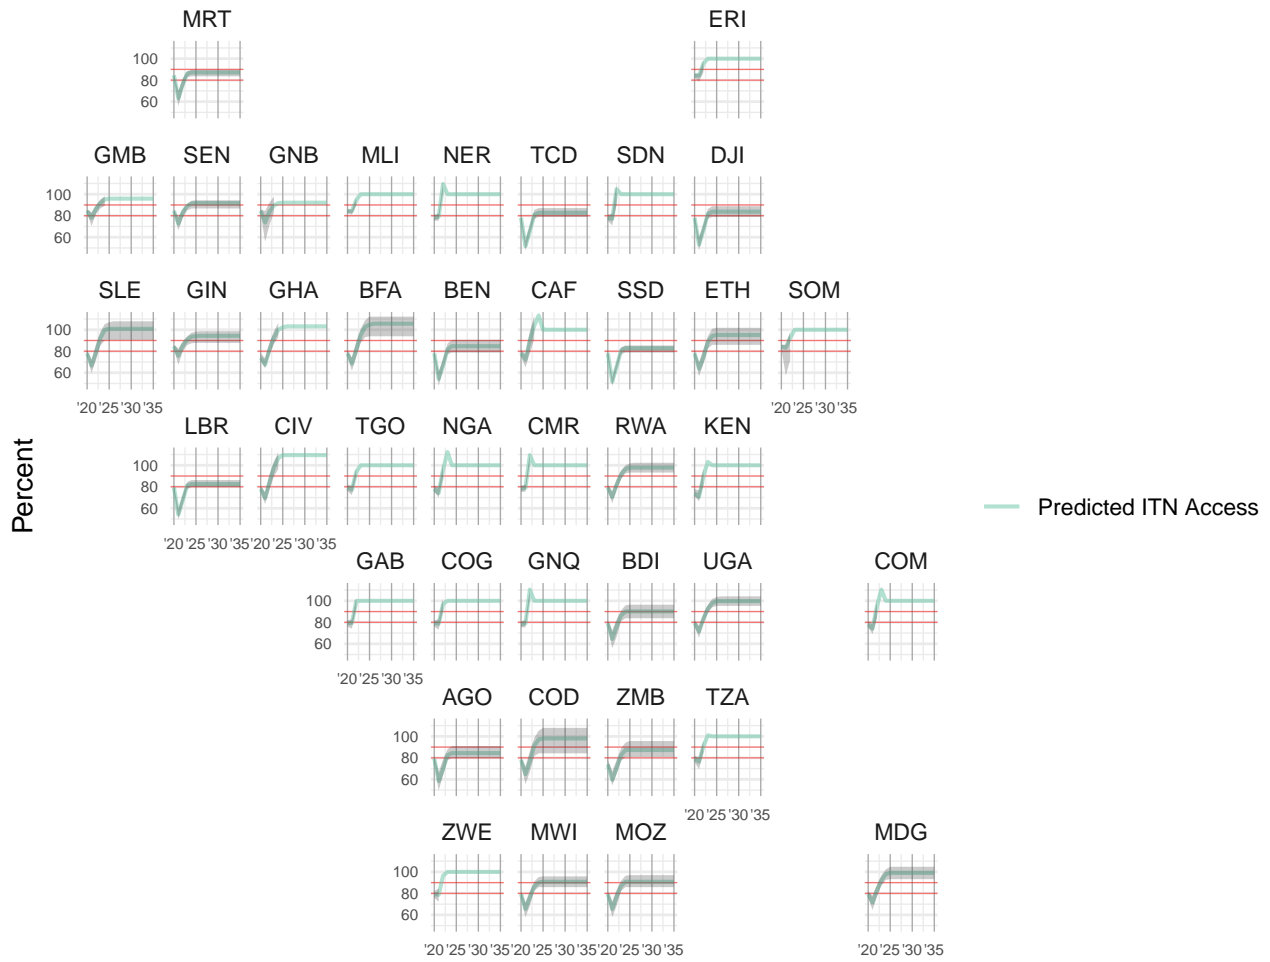

### ANC/EPI at 6% and annual school/community distribution at 38 % of the population

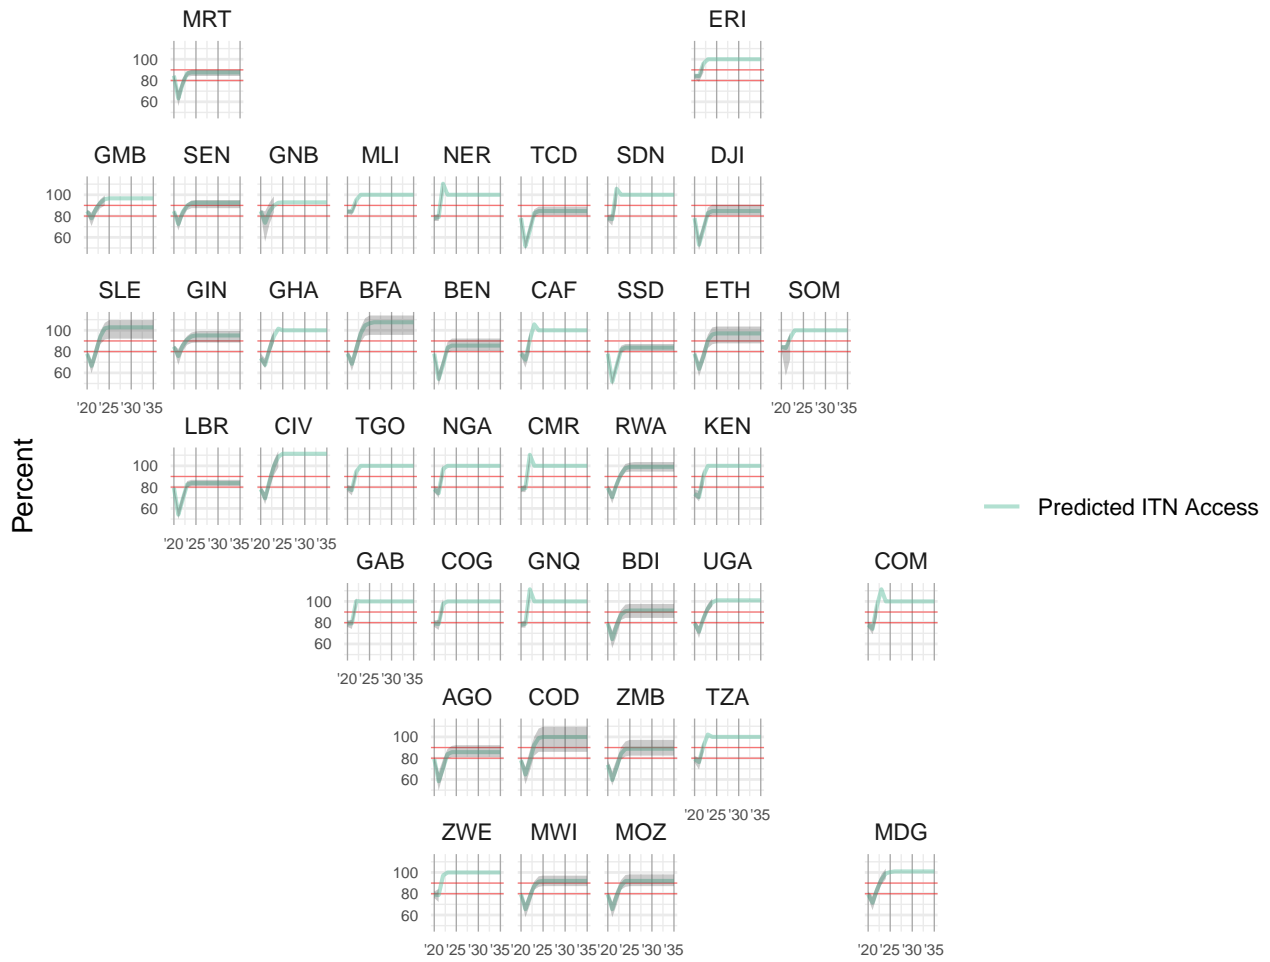

# ANC/EPI at 6% and annual school/community distribution at 39 % of the population

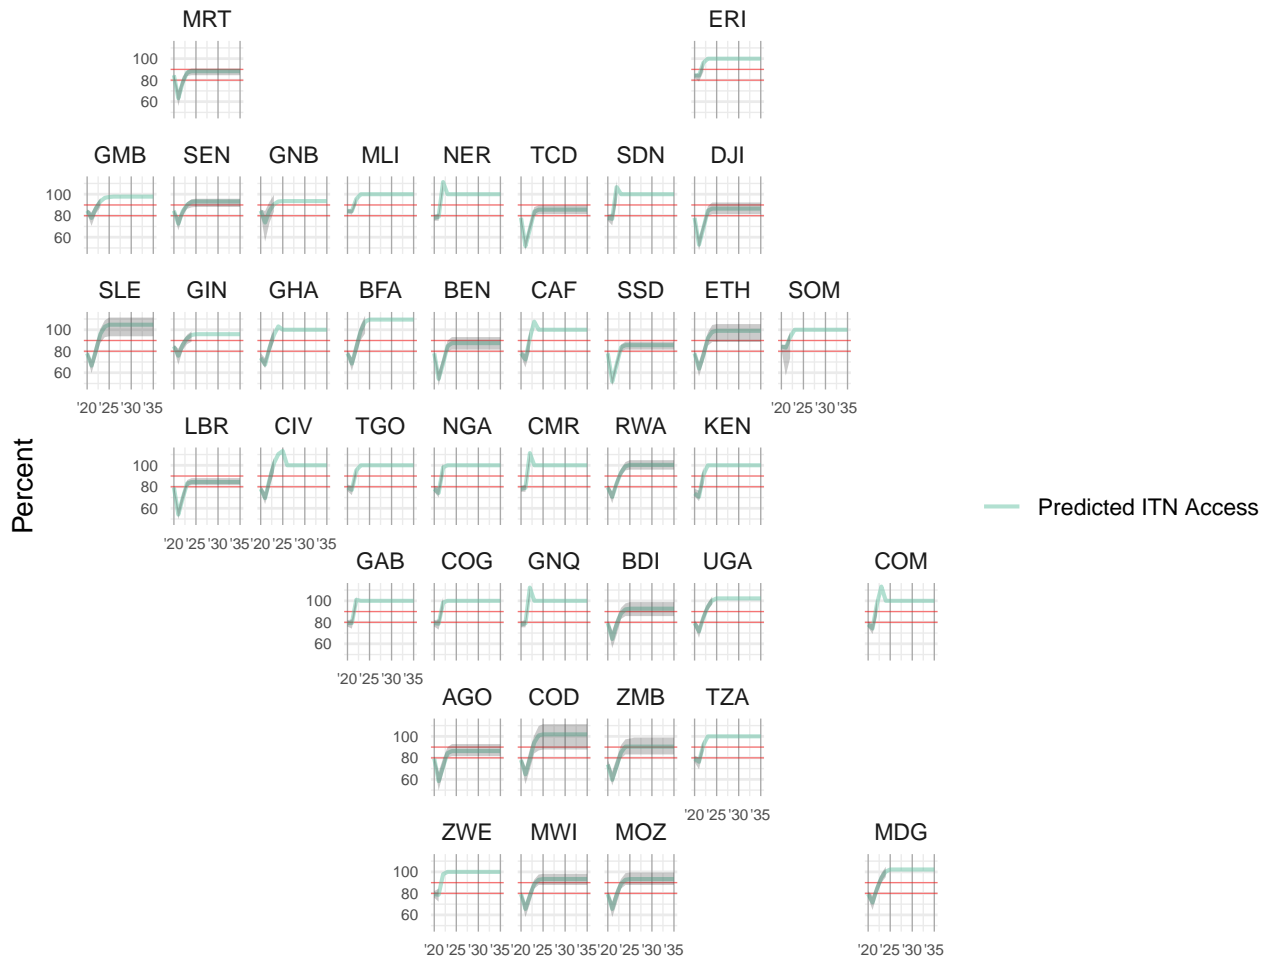

# ANC/EPI at 6% and annual school/community distribution at 40 % of the population

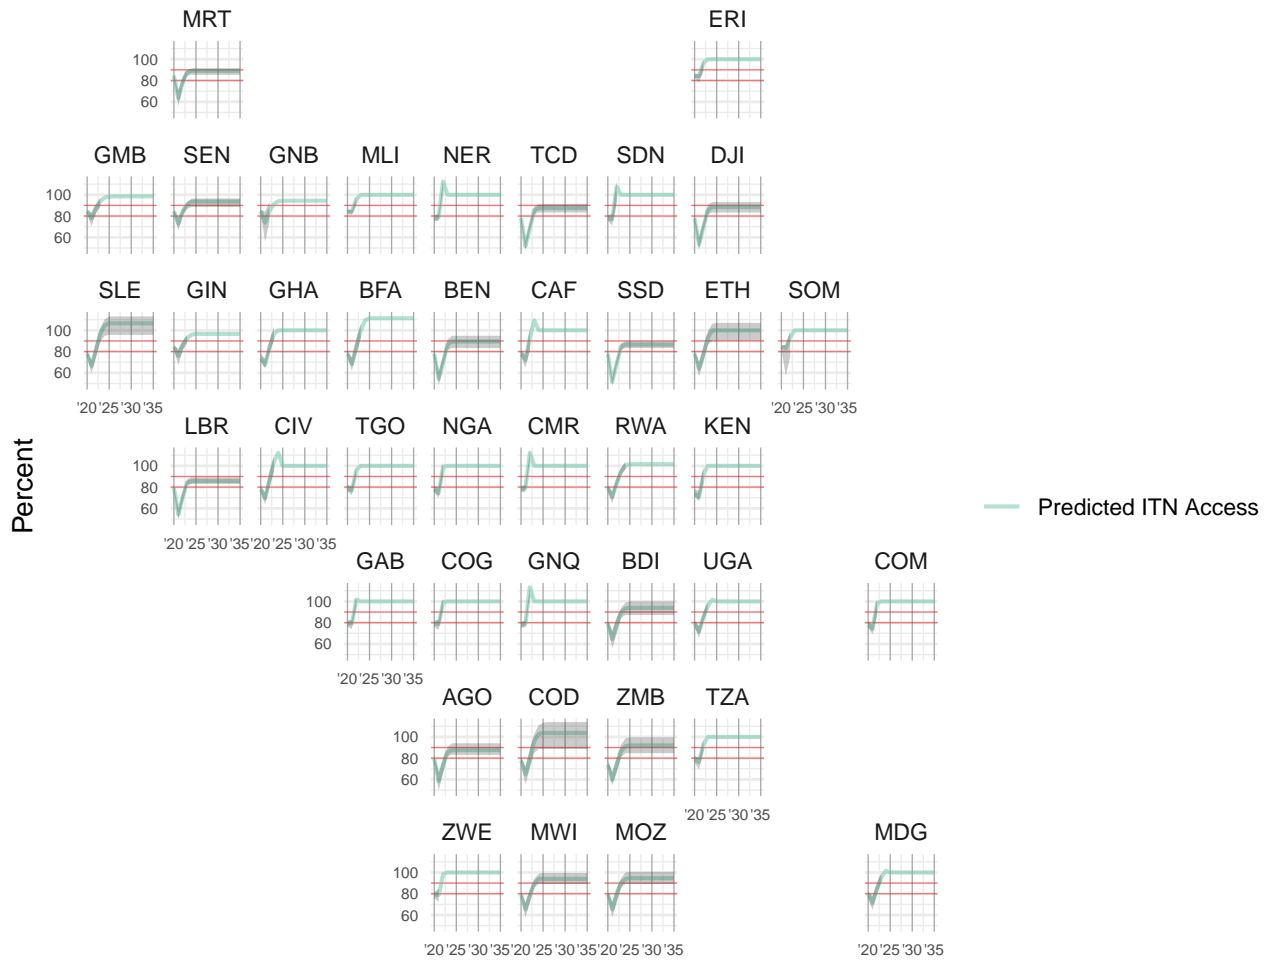

# ANC/EPI at 6% and annual school/community distribution at 41 % of the population

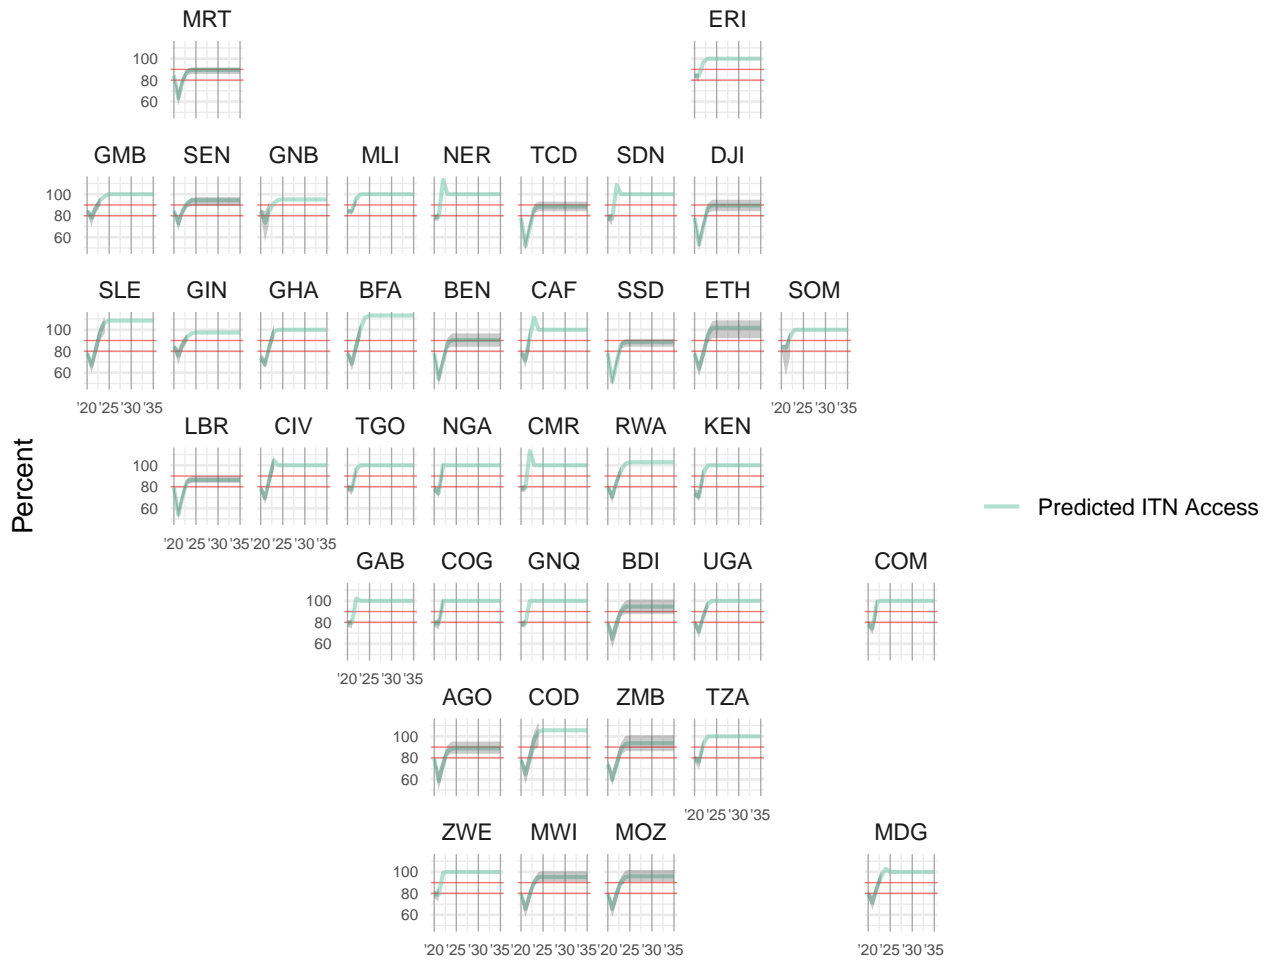

# ANC/EPI at 6% and annual school/community distribution at 42 % of the population

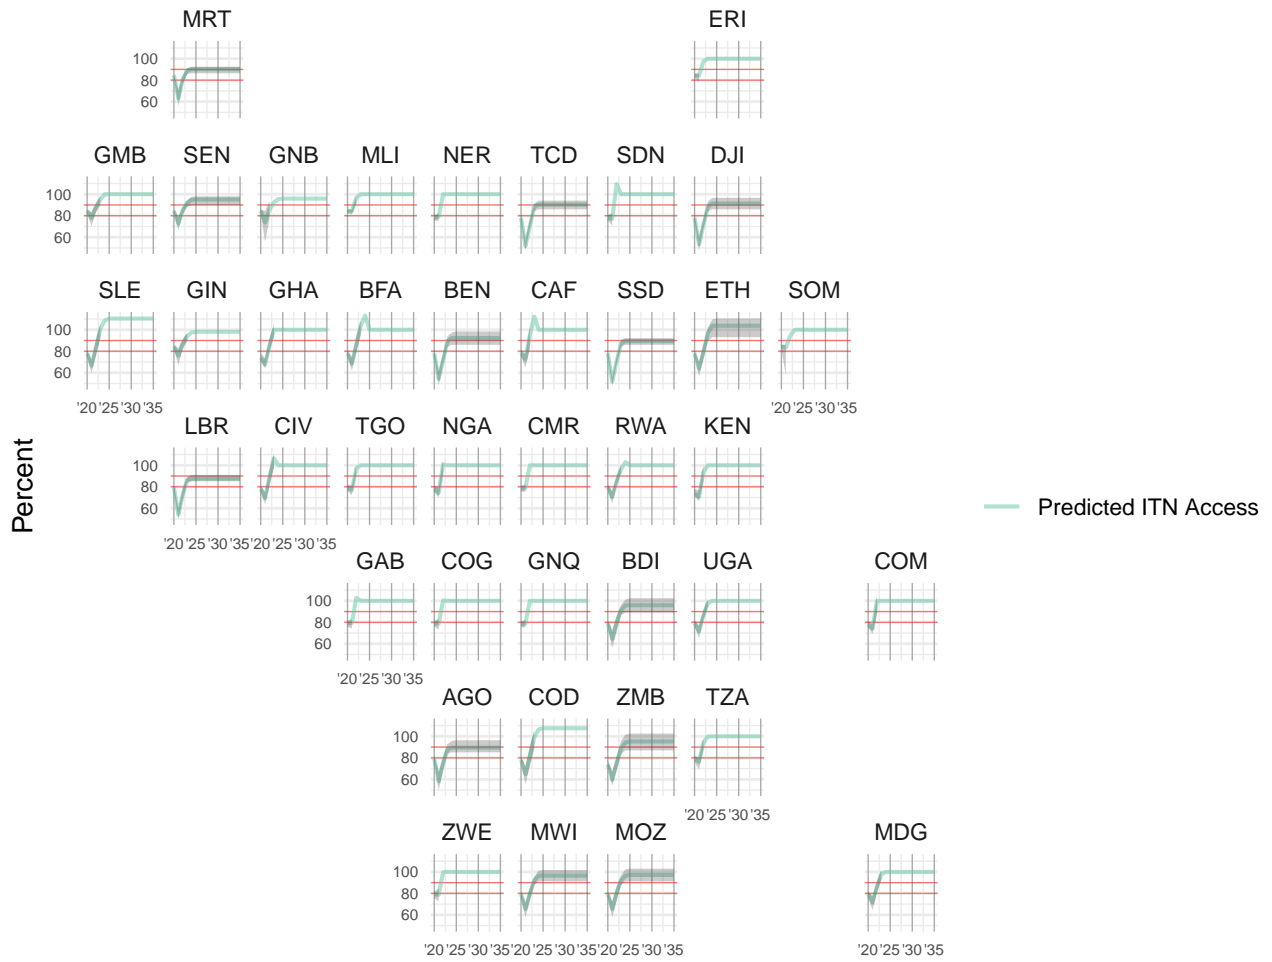

# ANC/EPI at 6% and annual school/community distribution at 43 % of the population

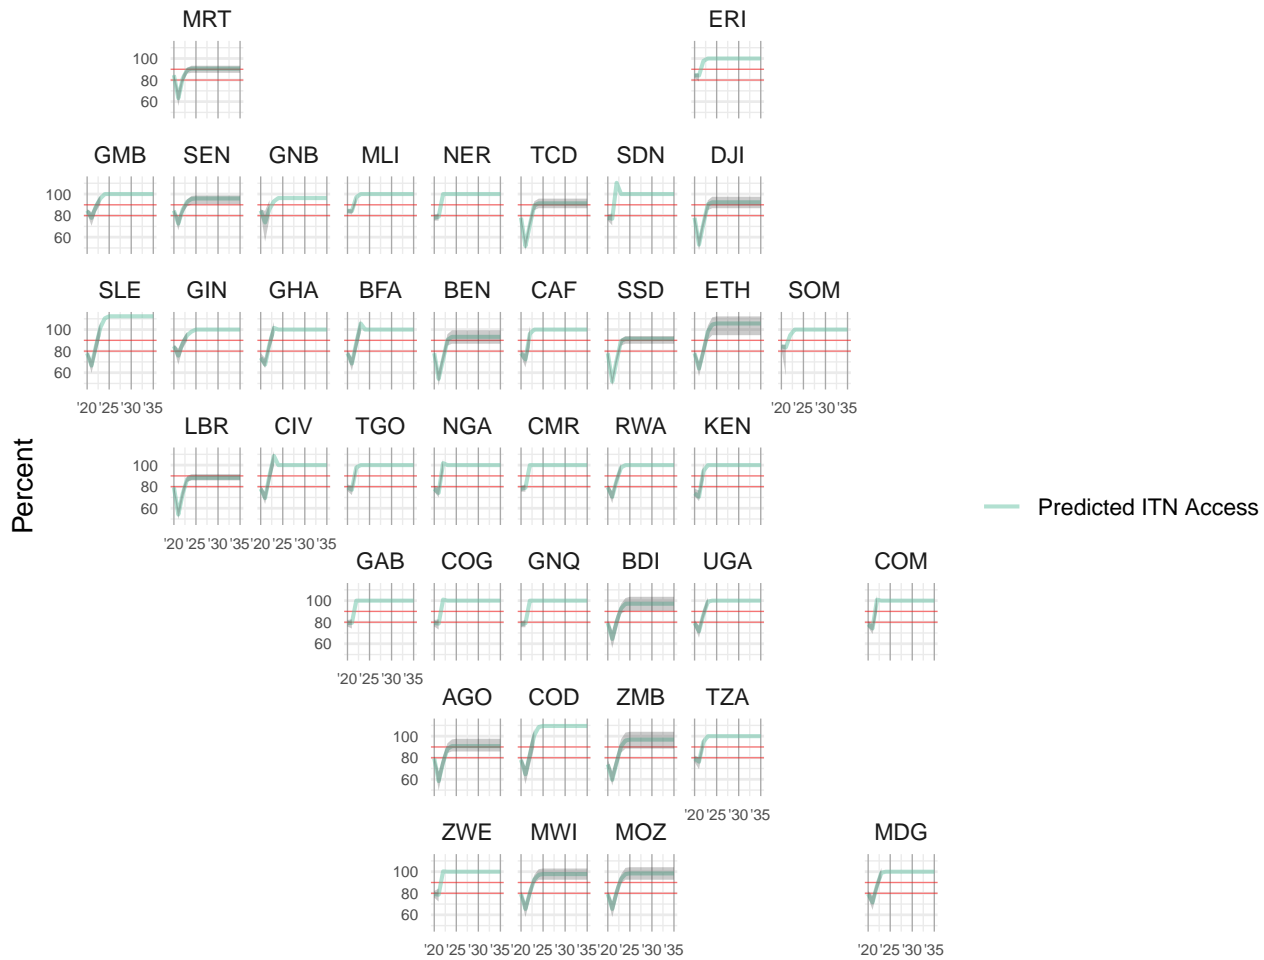



# ANC/EPI at 6% and annual school/community distribution at 44 % of the population

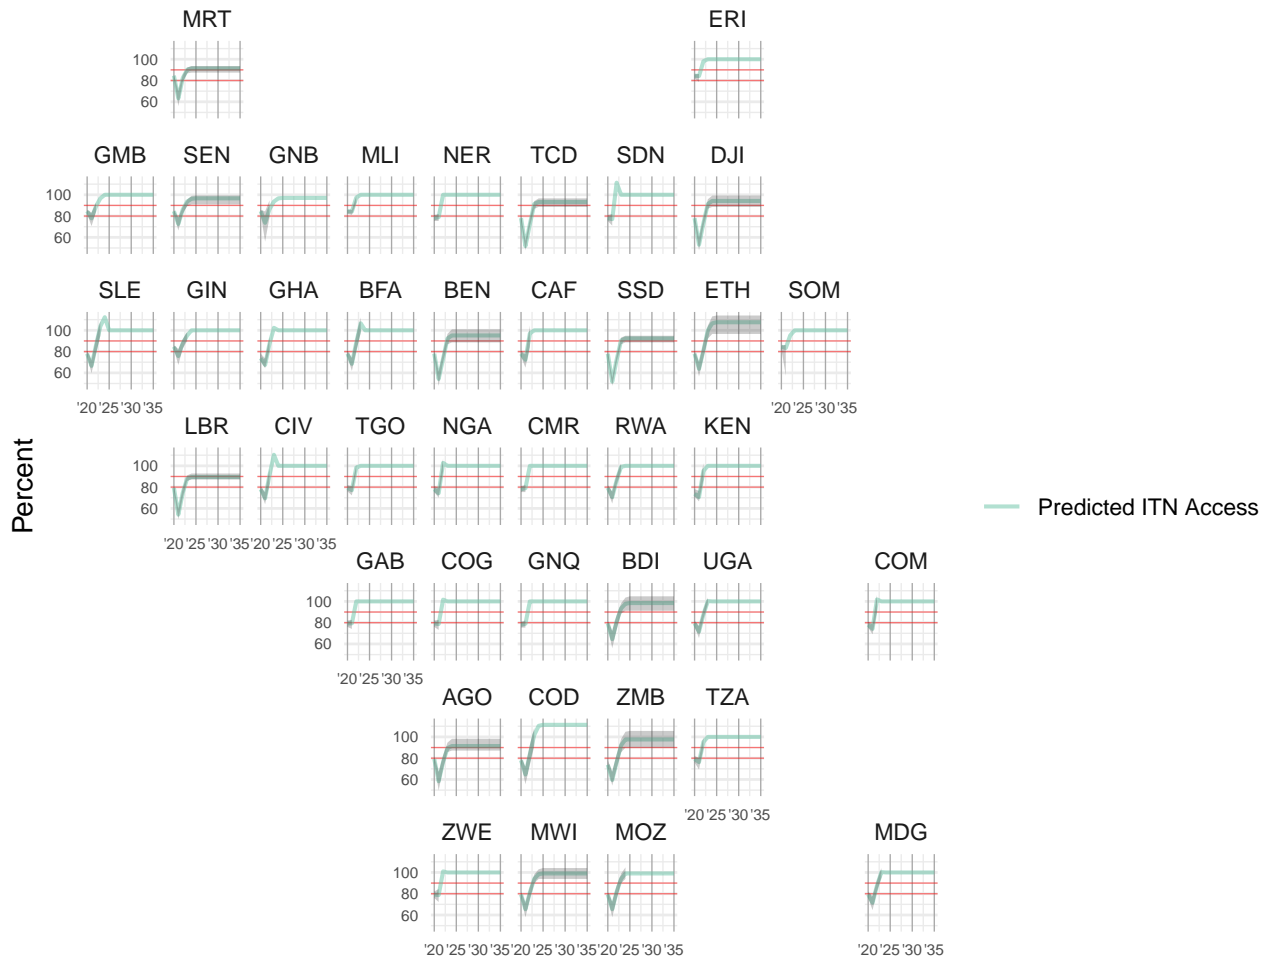

# ANC/EPI at 6% and annual school/community distribution at 45 % of the population

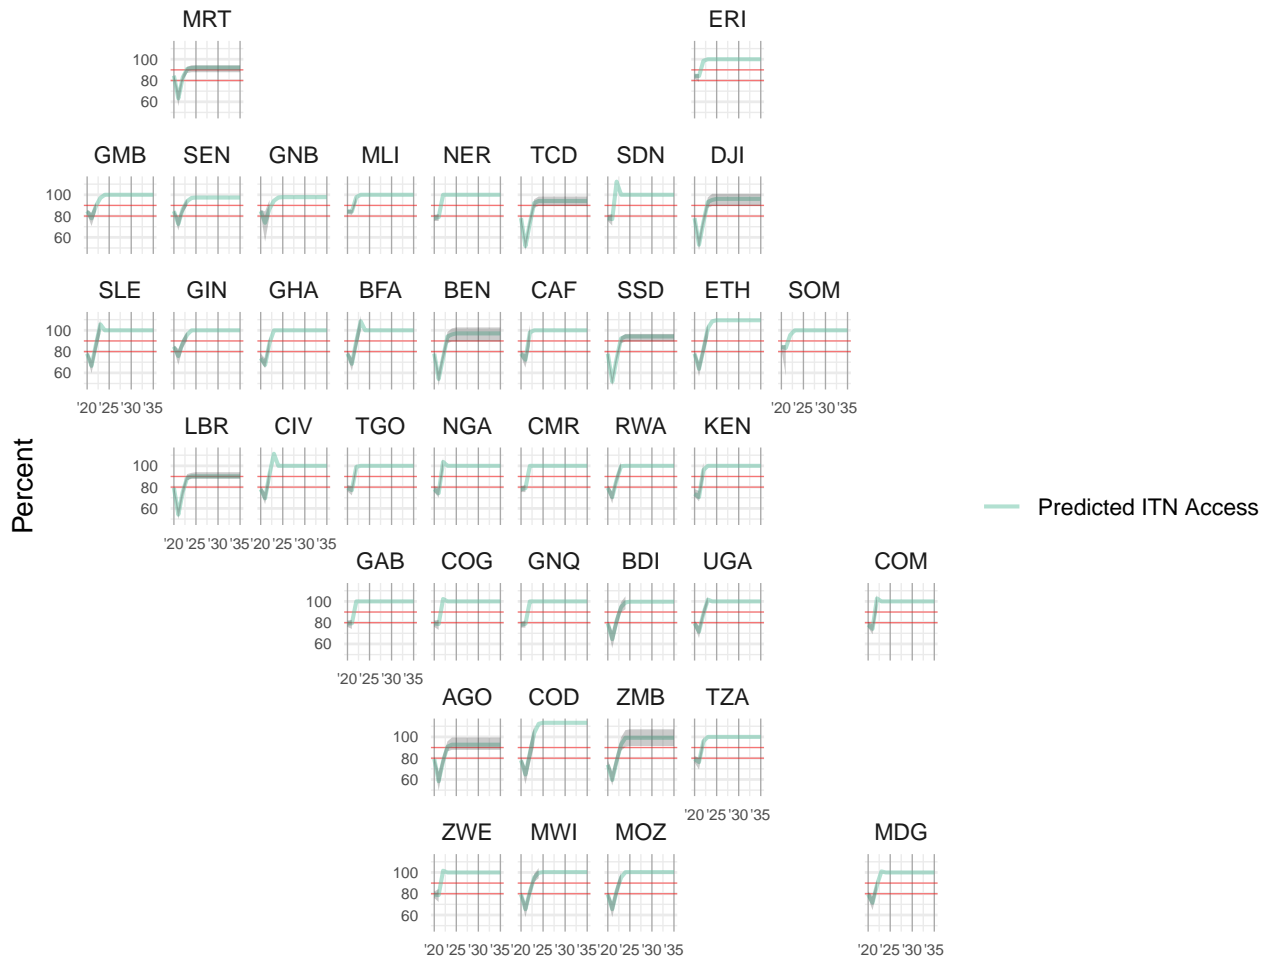

# ANC/EPI at 6% and annual school/community distribution at 46 % of the population

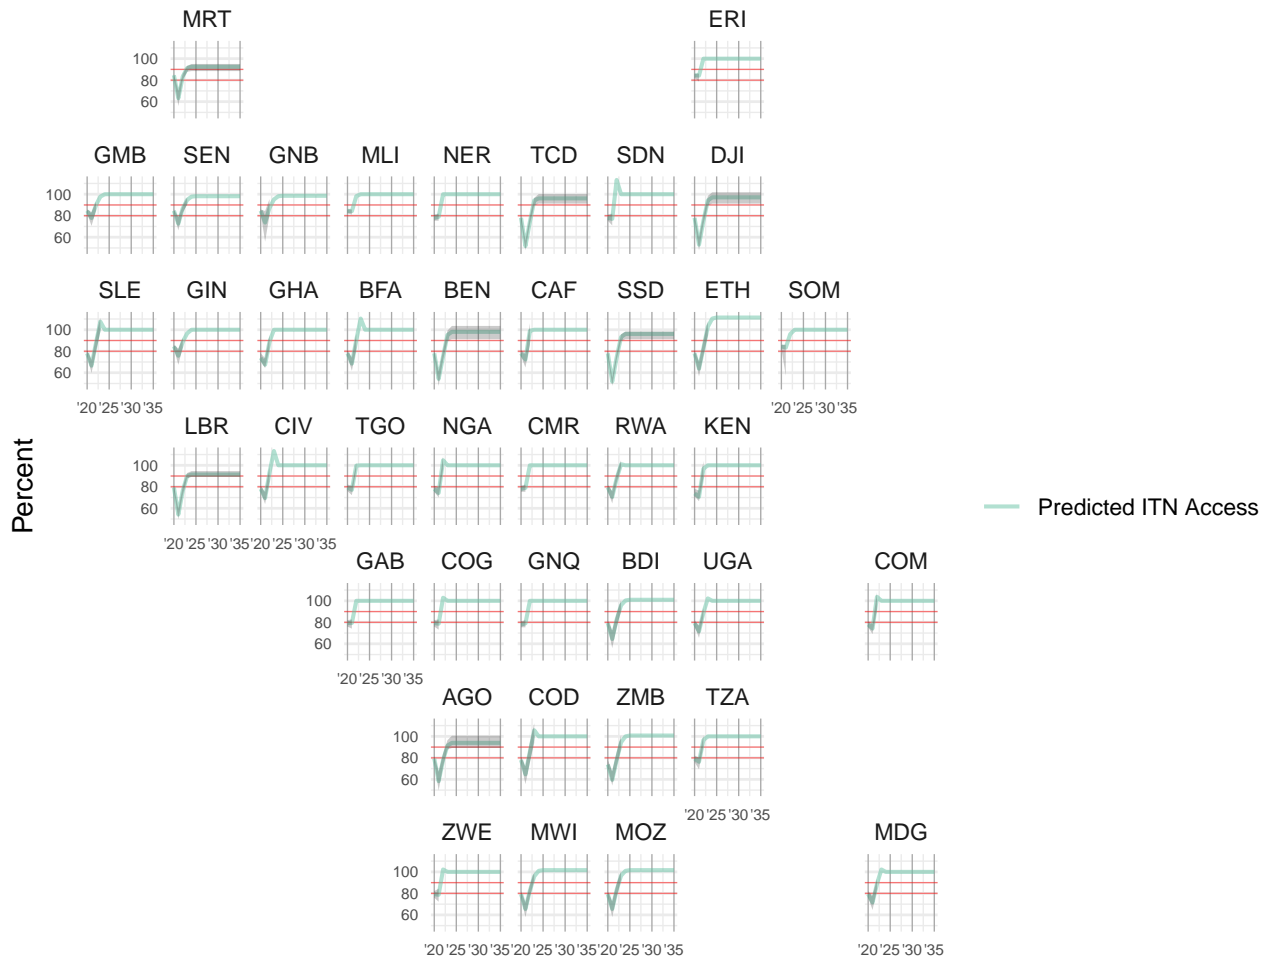

# ANC/EPI at 6% and annual school/community distribution at 47 % of the population

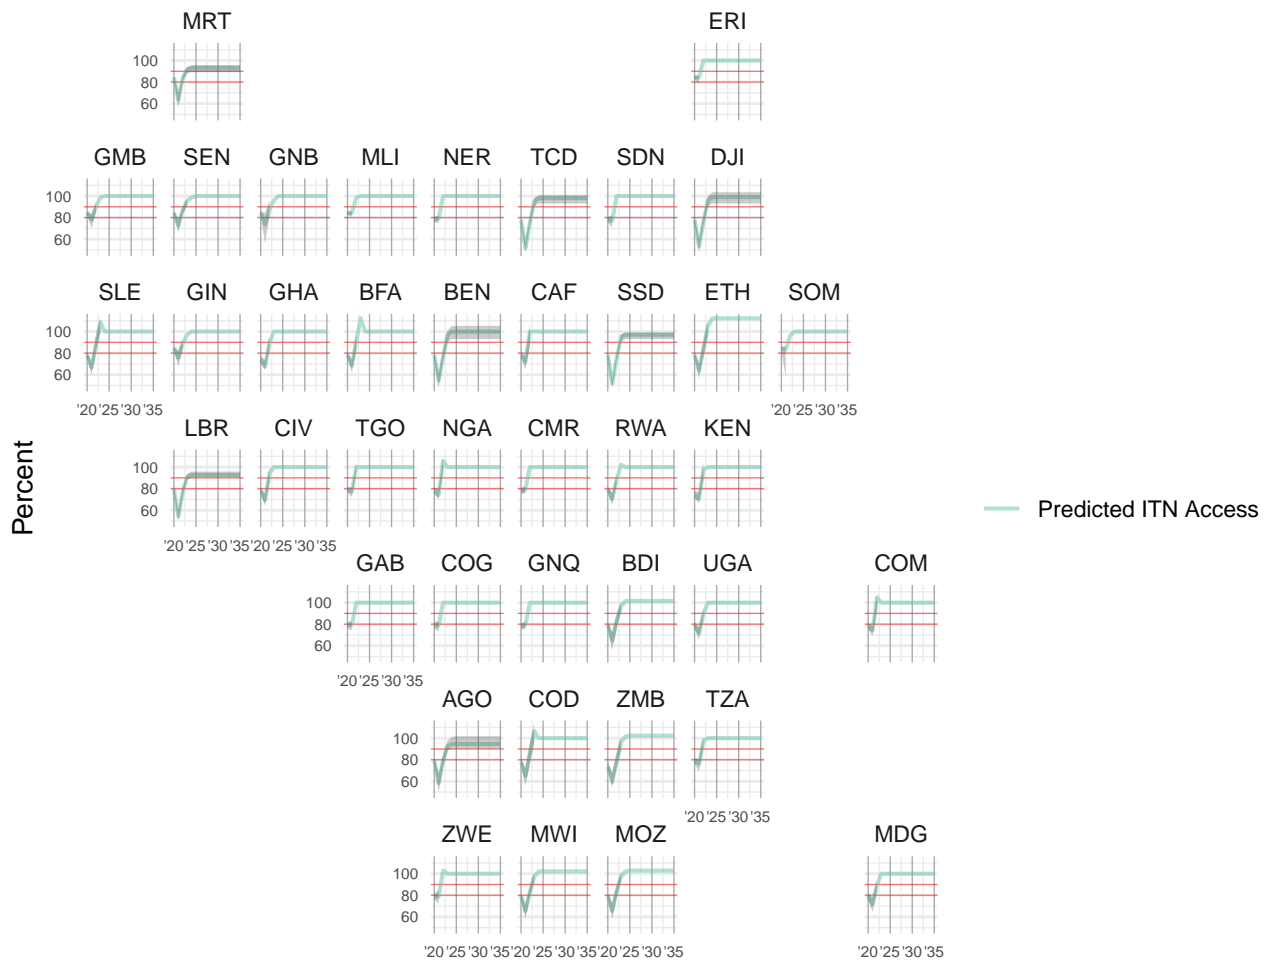

# ANC/EPI at 6% and annual school/community distribution at 48 % of the population

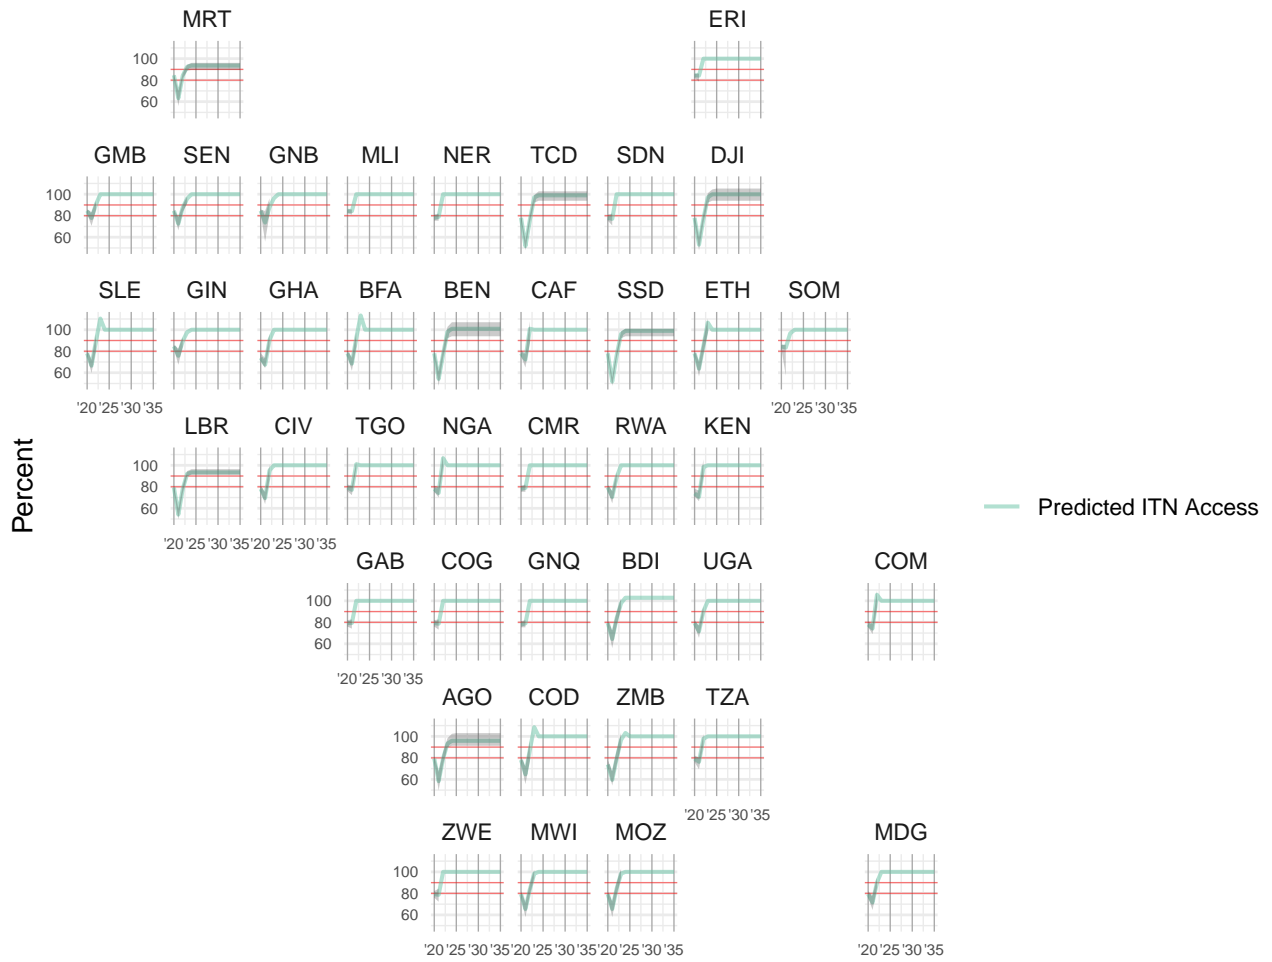

# ANC/EPI at 6% and annual school/community distribution at 49 % of the population

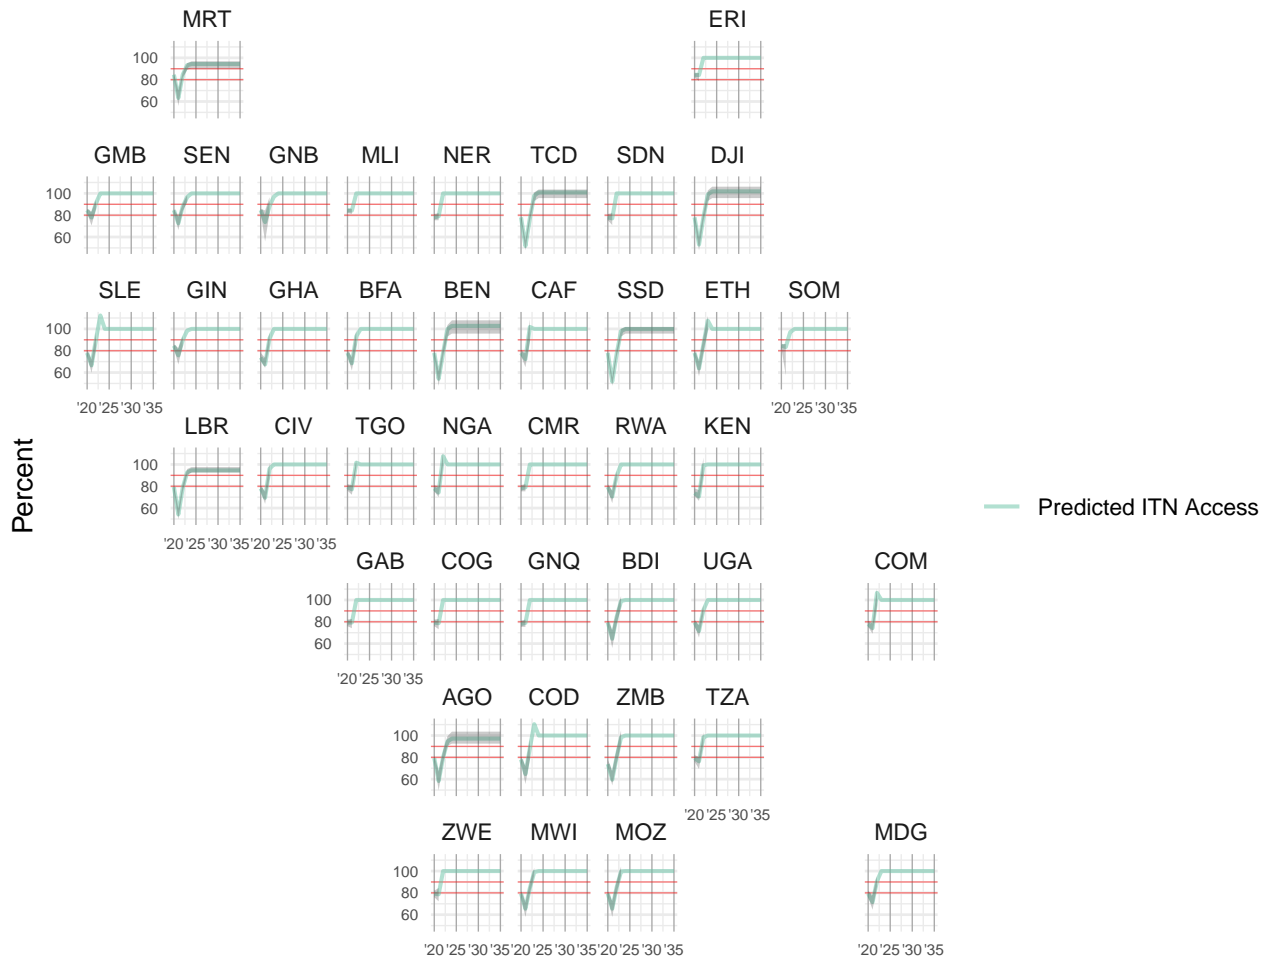

# ANC/EPI at 6% and annual school/community distribution at 50% of the population

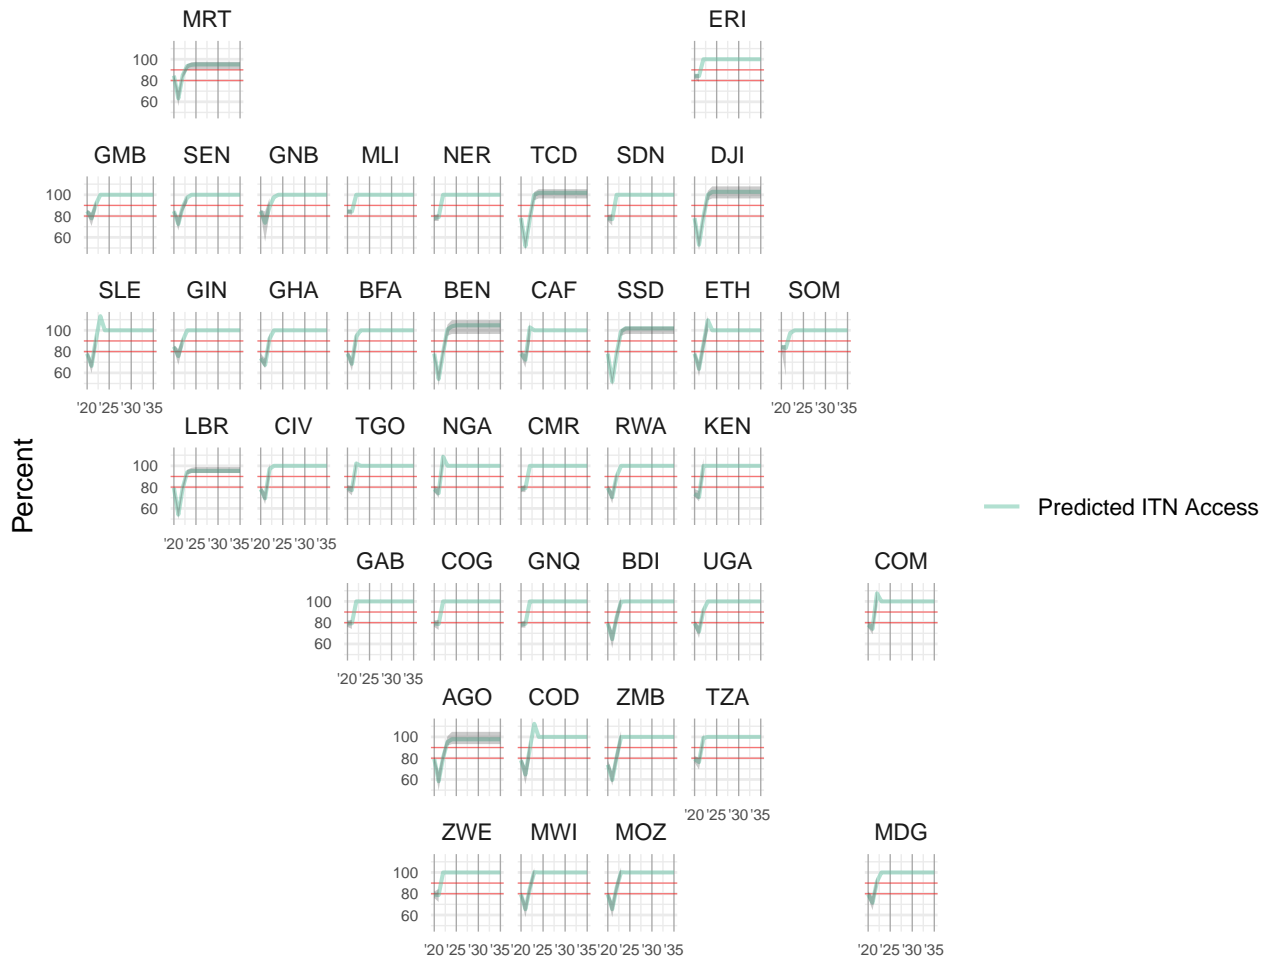

### 3 Scenario 3 - Three-year mass campaigns with ANC/EPI distribution at 6%, varying annual school/community distribution between campaigns

3-year mass campaigns with ANC/EPI at 6% and between-campaign school/community distribution at 0% of the population

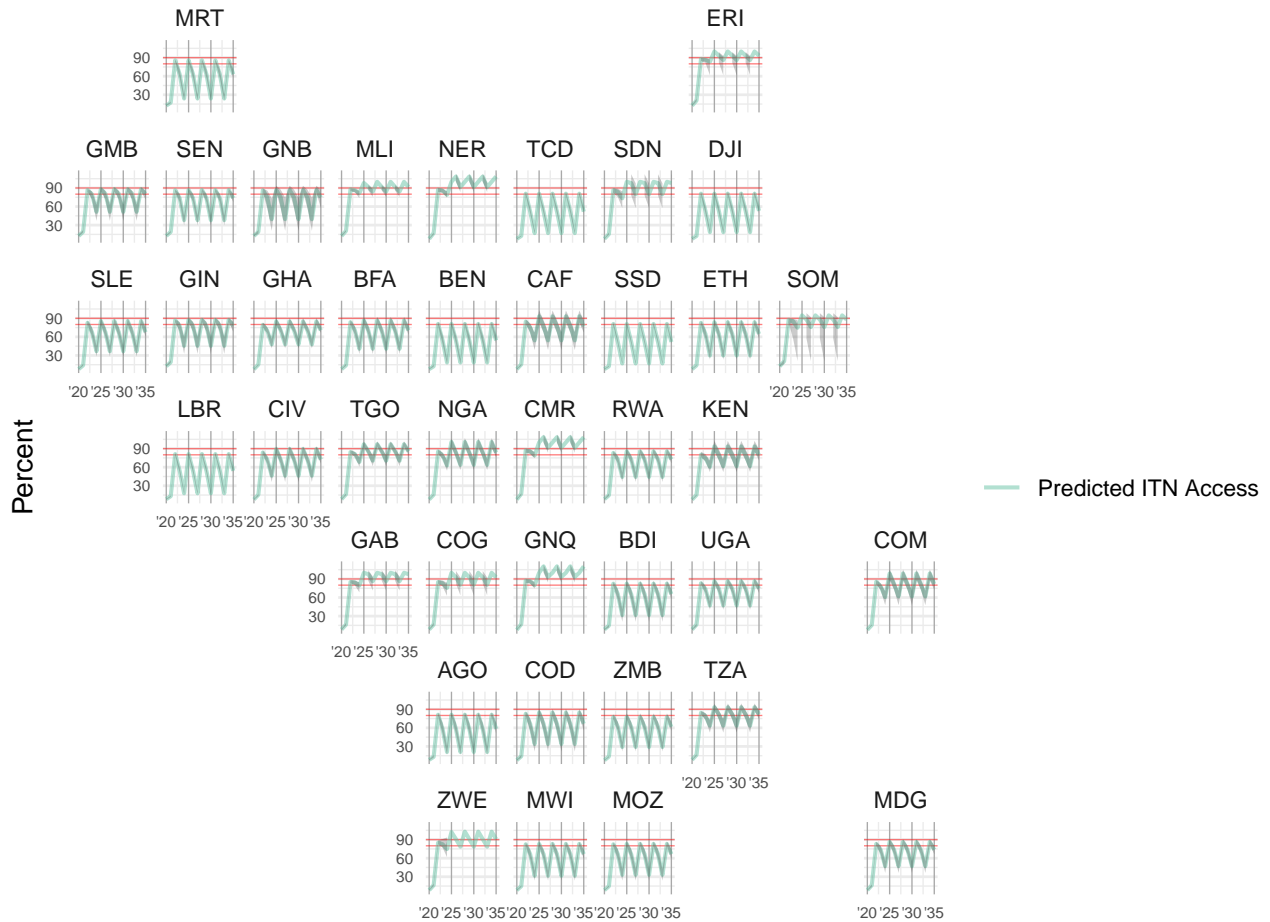



3-year mass campaigns with ANC/EPI at 6%  
and between-campaign school/community distribution  
at 1 % of the population

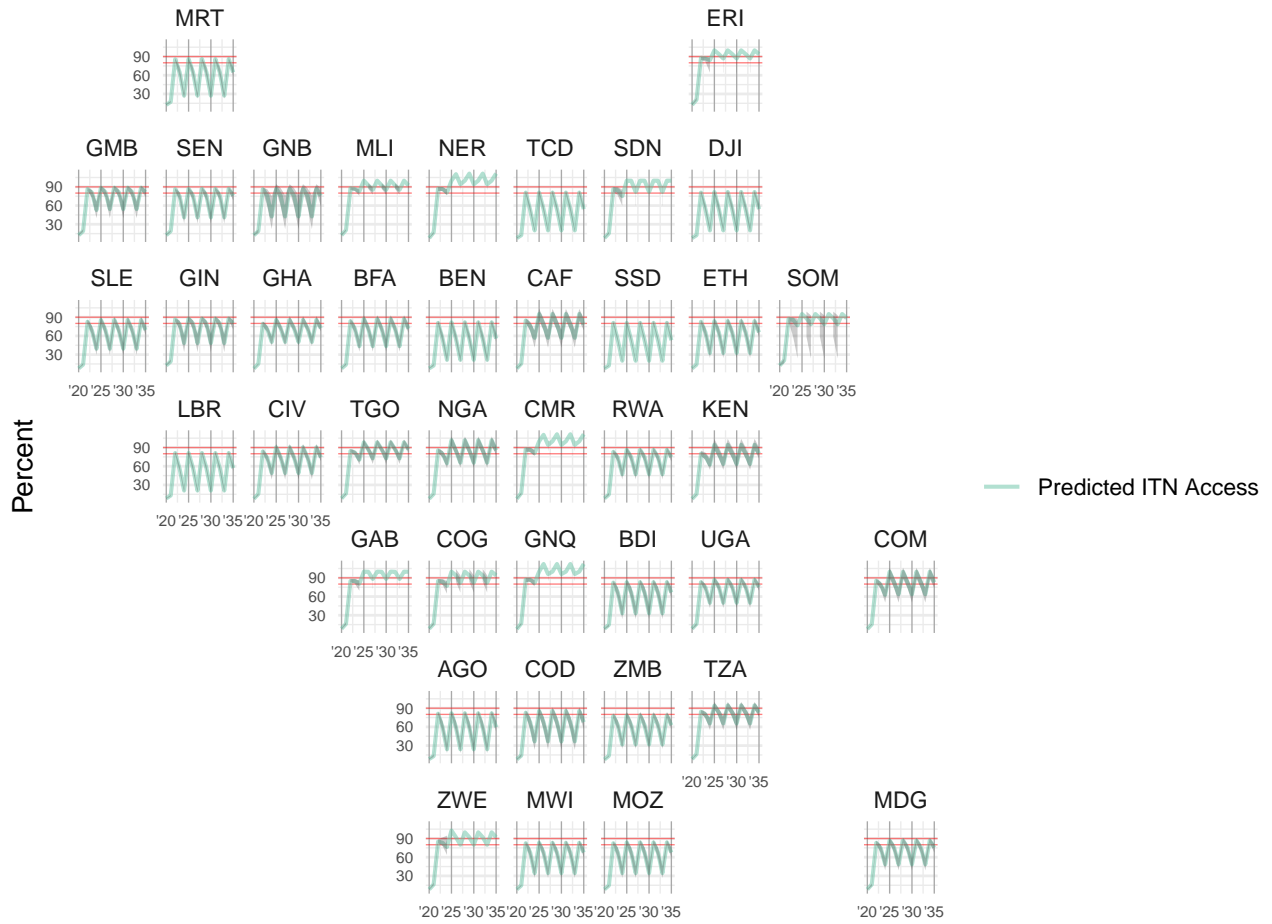

3-year mass campaigns with ANC/EPI at 6%  
and between-campaign school/community distribution  
at 2 % of the population

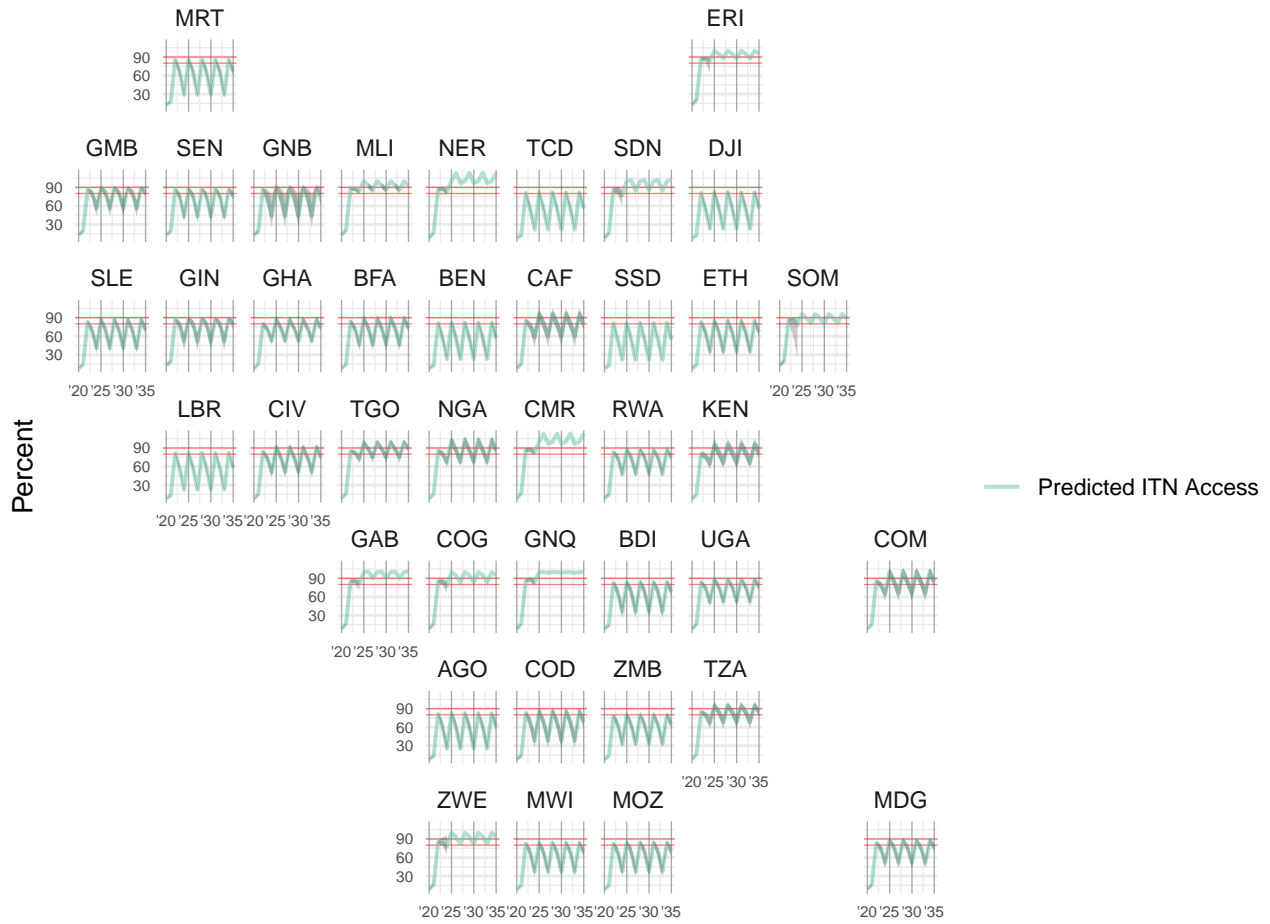

3-year mass campaigns with ANC/EPI at 6%  
and between-campaign school/community distribution  
at 3% of the population

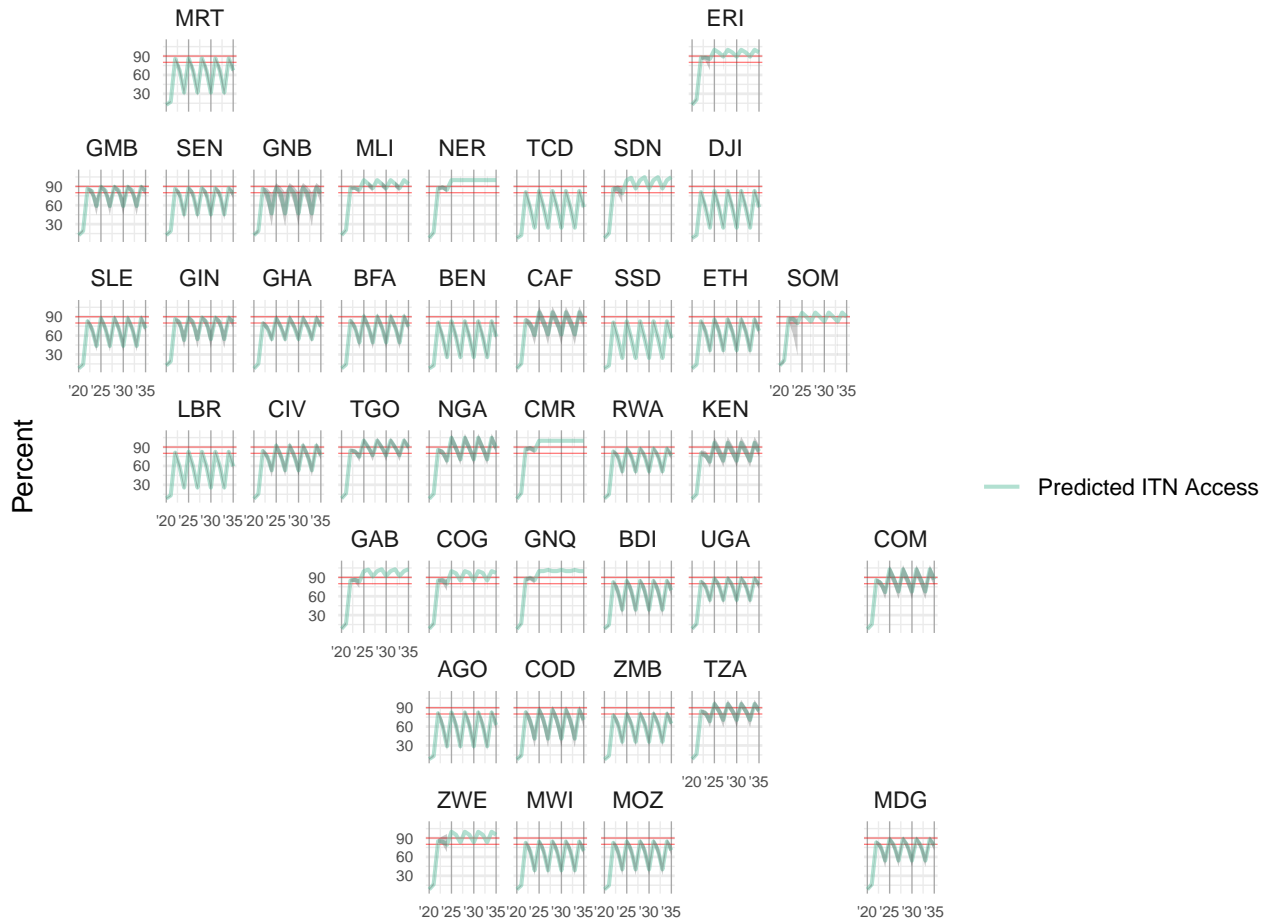

3-year mass campaigns with ANC/EPI at 6%  
and between-campaign school/community distribution  
at 4 % of the population

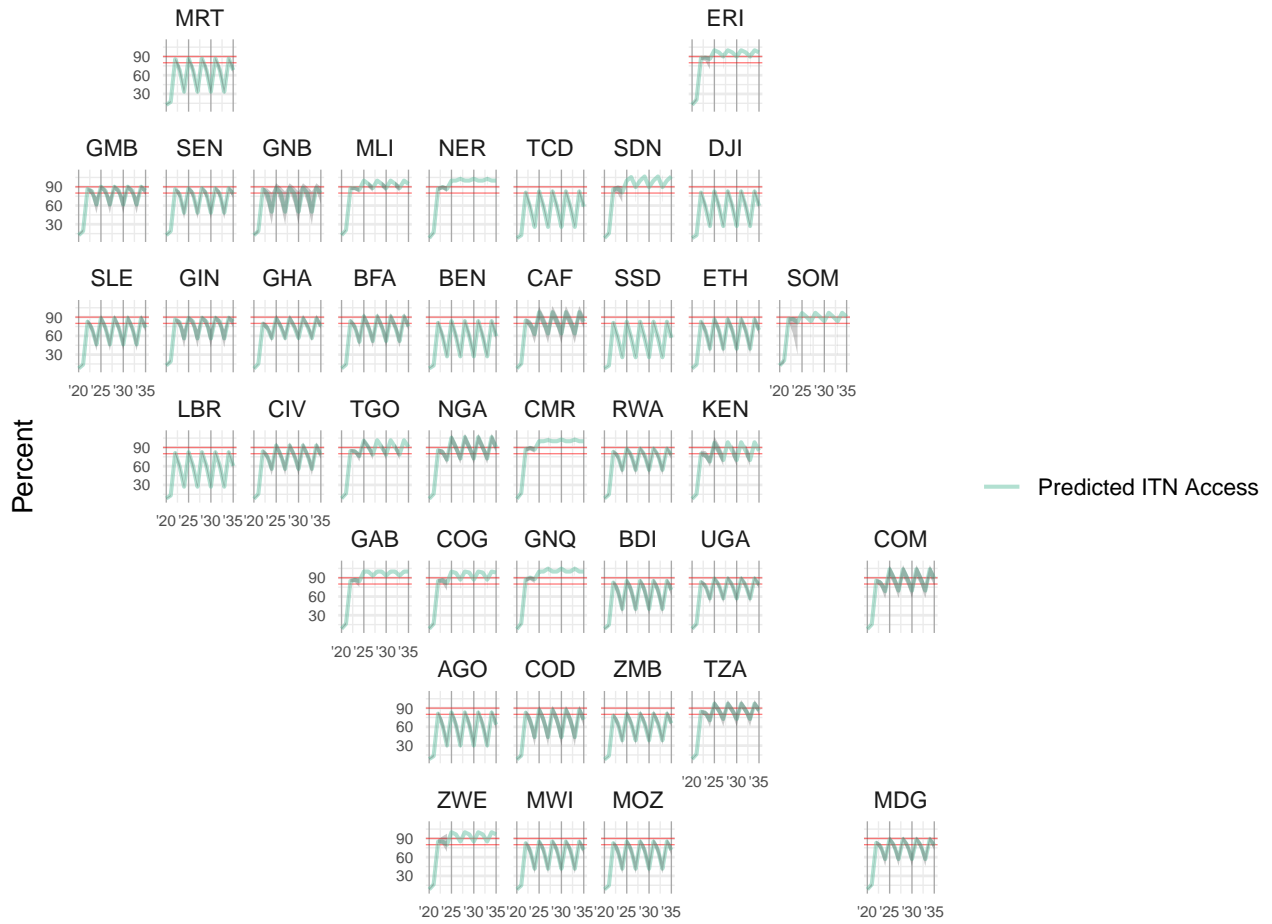

3-year mass campaigns with ANC/EPI at 6%  
and between-campaign school/community distribution  
at 5 % of the population

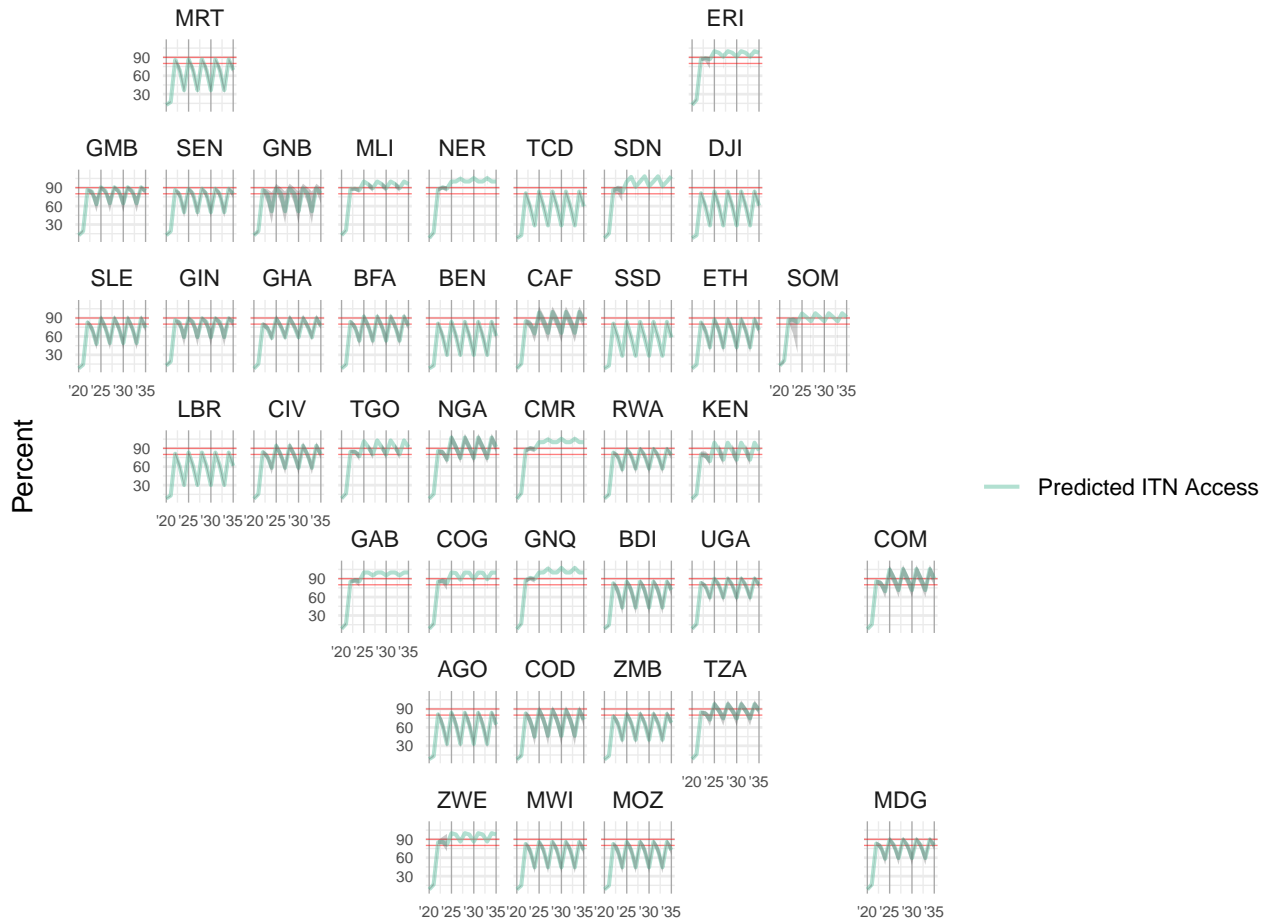

### 3-year mass campaigns with ANC/EPI at 6% and between-campaign school/community distribution at 6% of the population

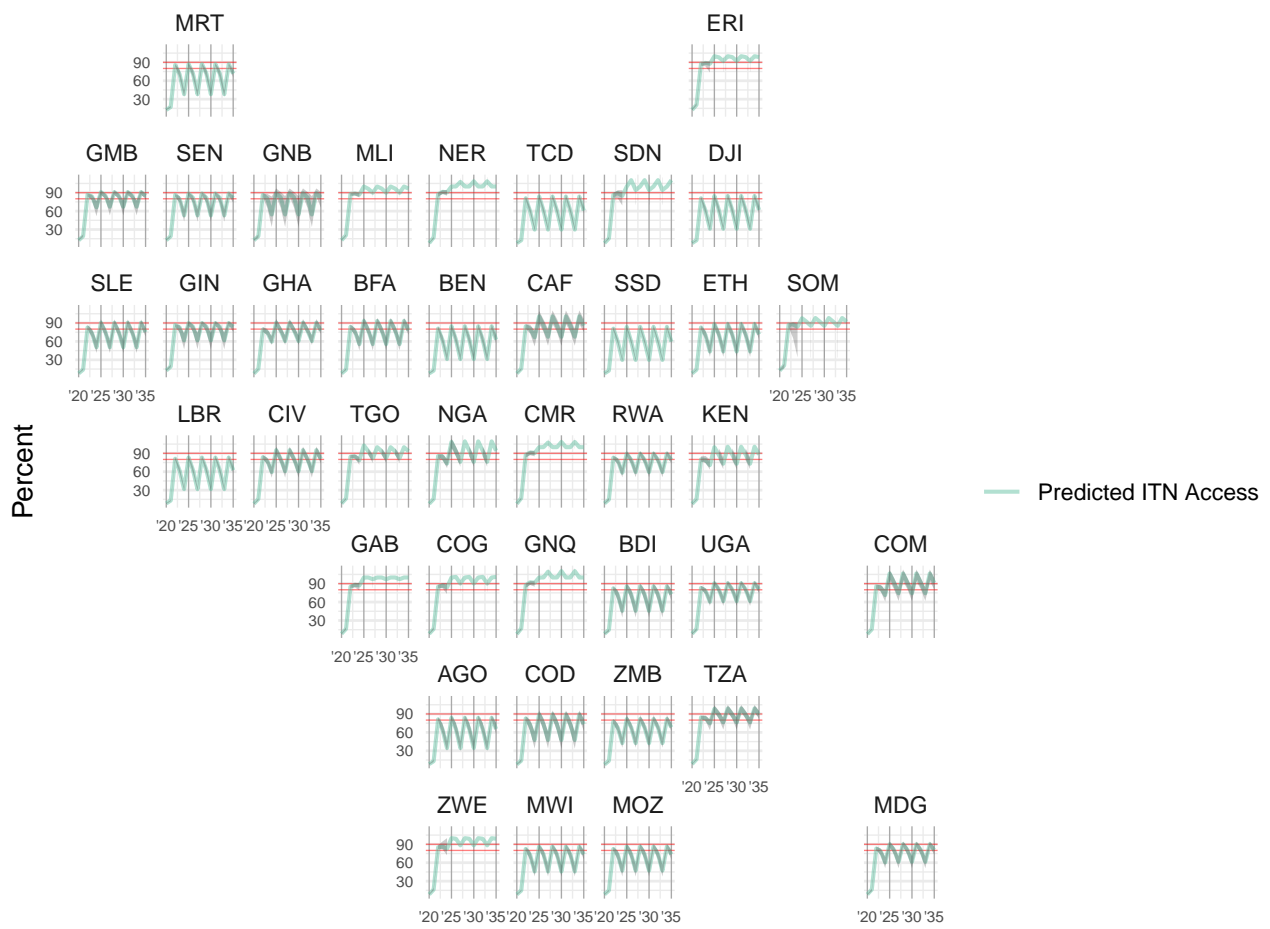

3-year mass campaigns with ANC/EPI at 6%  
and between-campaign school/community distribution  
at 7 % of the population

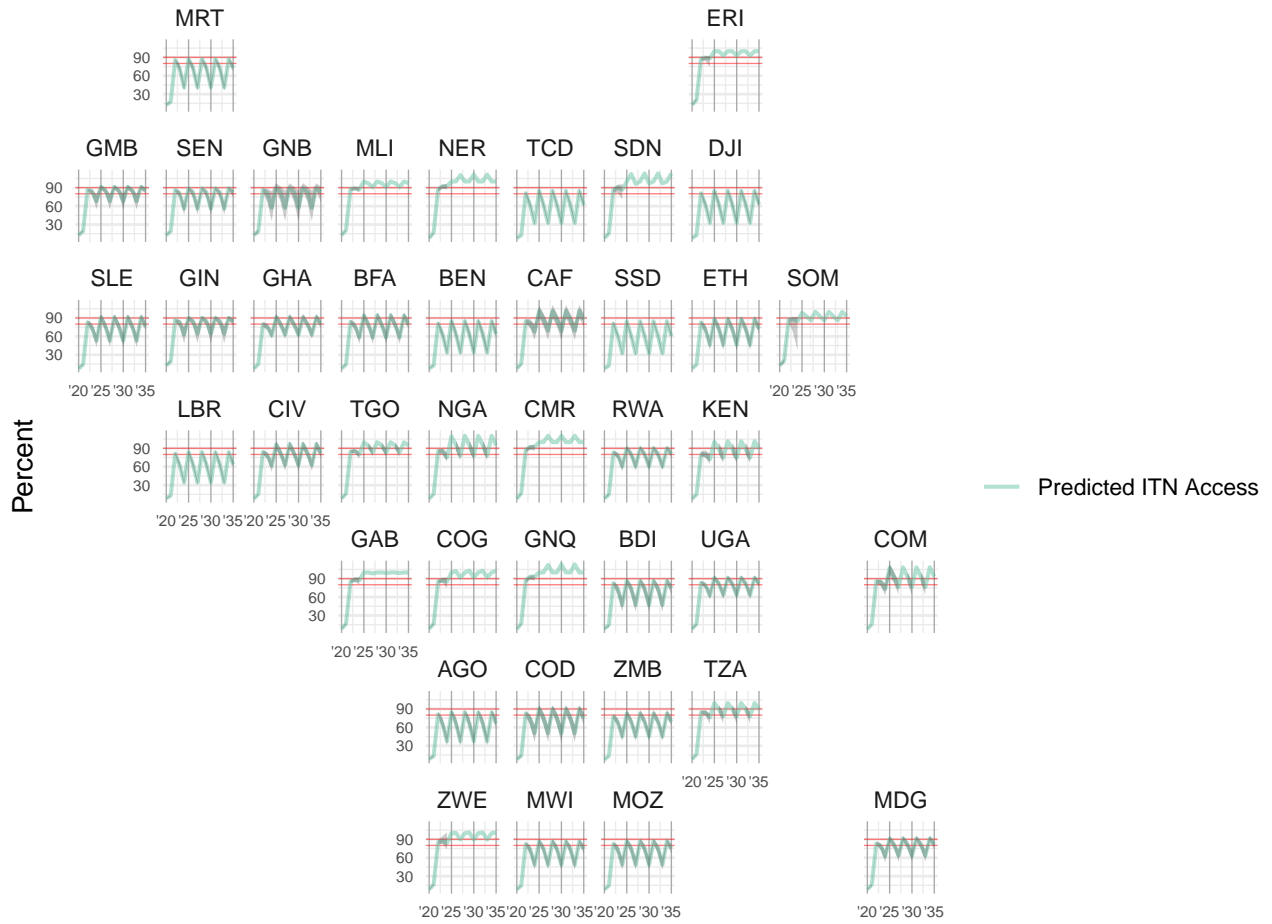

3-year mass campaigns with ANC/EPI at 6% and between-campaign school/community distribution at 8 % of the population

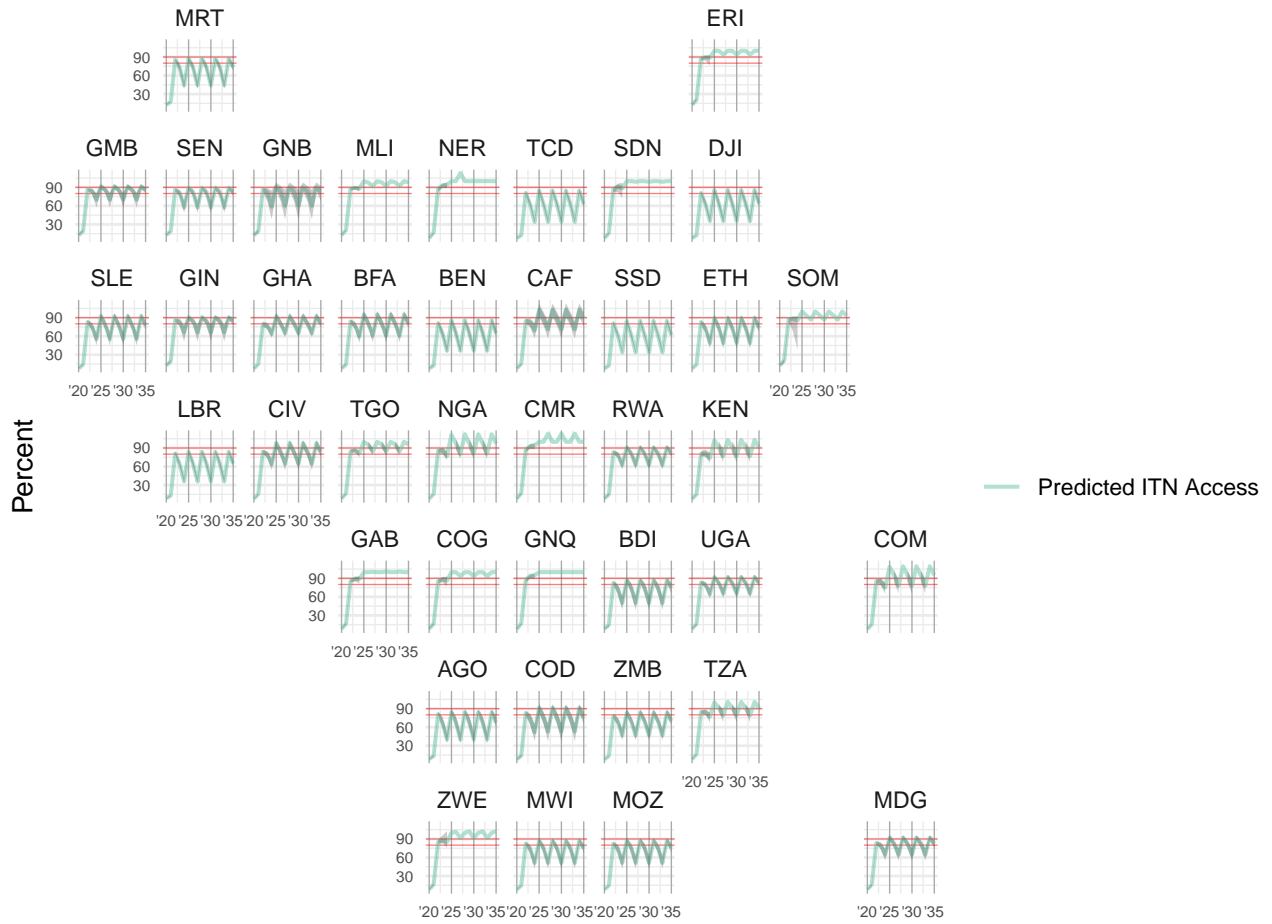



3-year mass campaigns with ANC/EPI at 6%  
and between-campaign school/community distribution  
at 9 % of the population

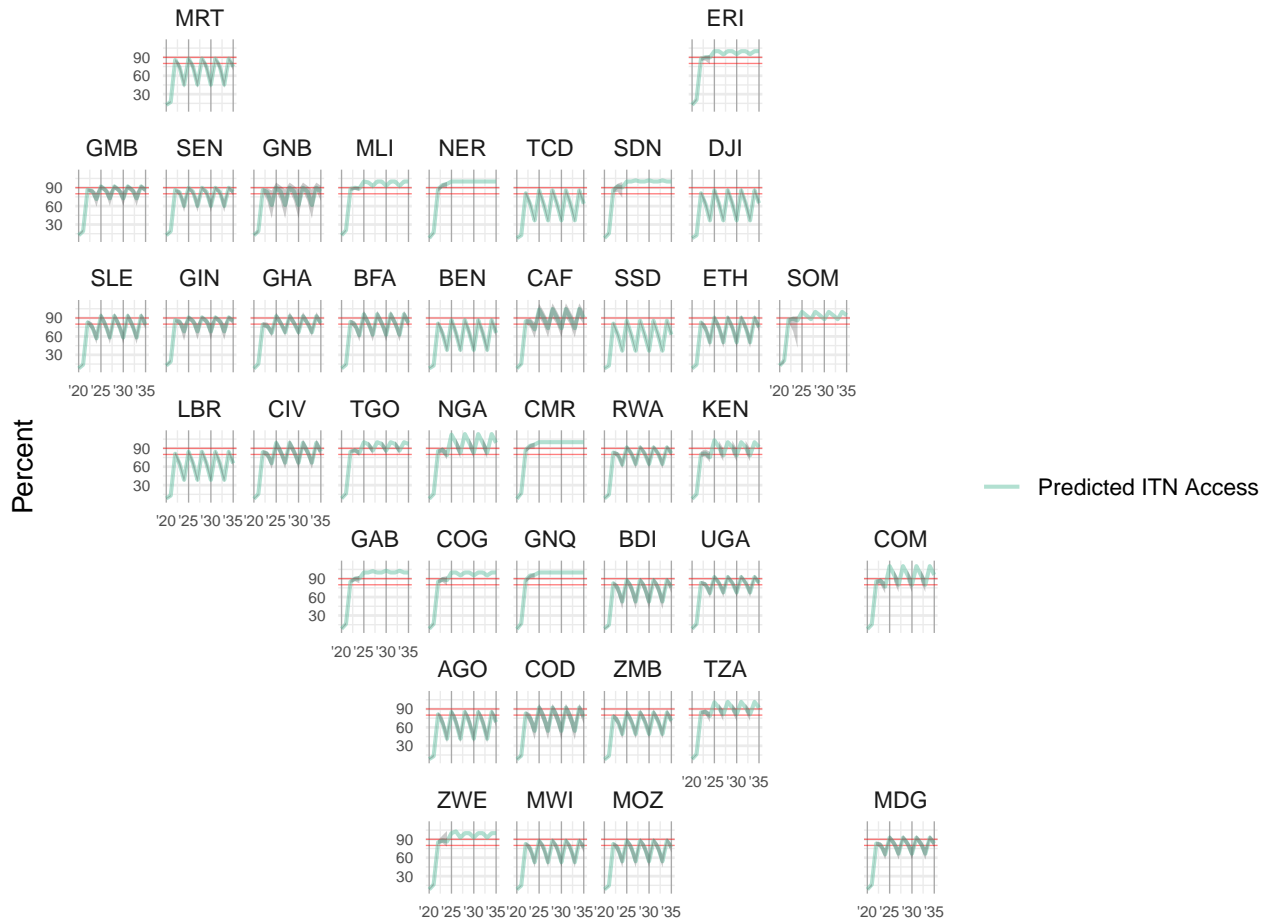

3-year mass campaigns with ANC/EPI at 6% and between-campaign school/community distribution at 10% of the population

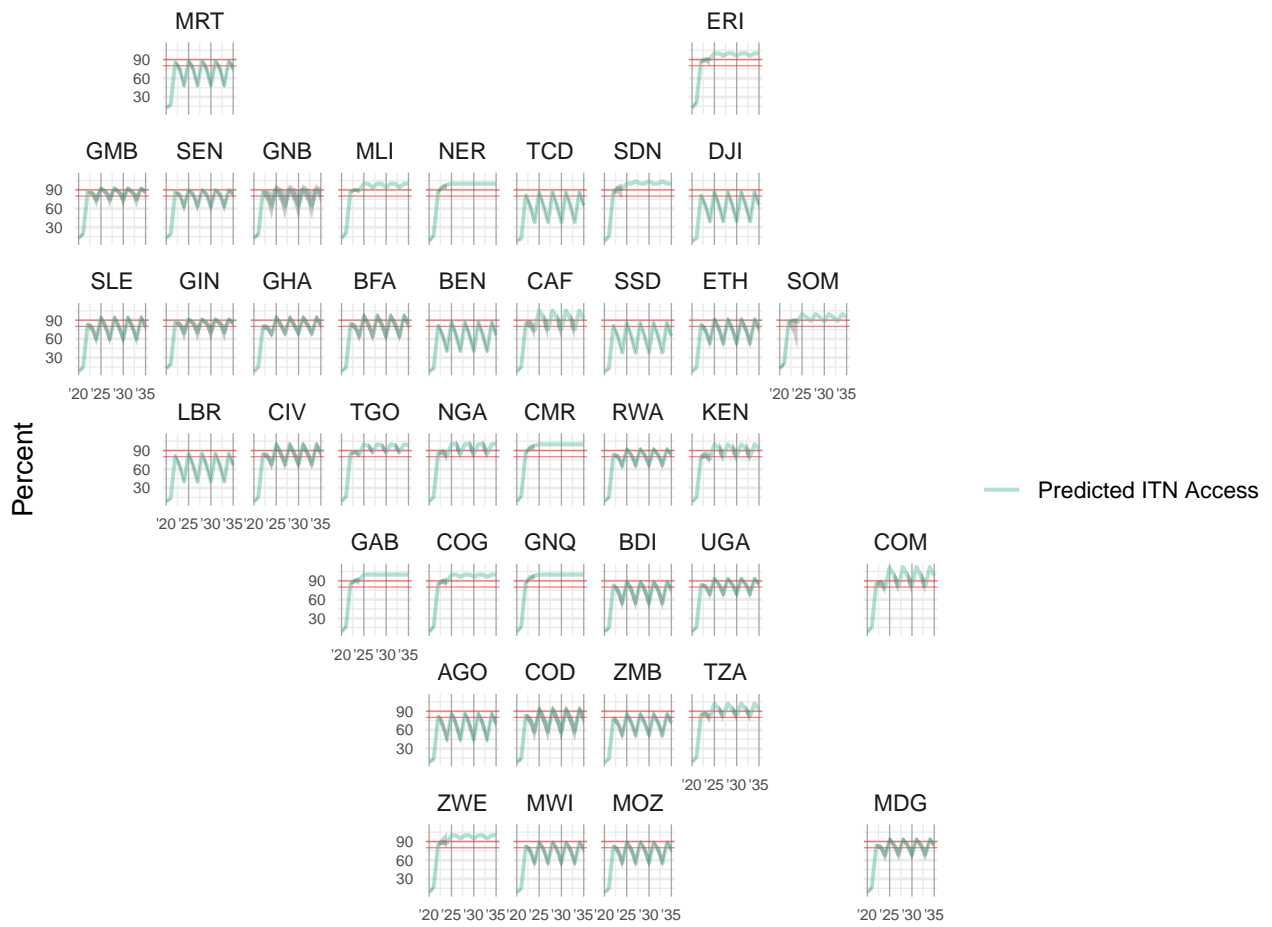

3-year mass campaigns with ANC/EPI at 6%  
and between-campaign school/community distribution  
at 11 % of the population

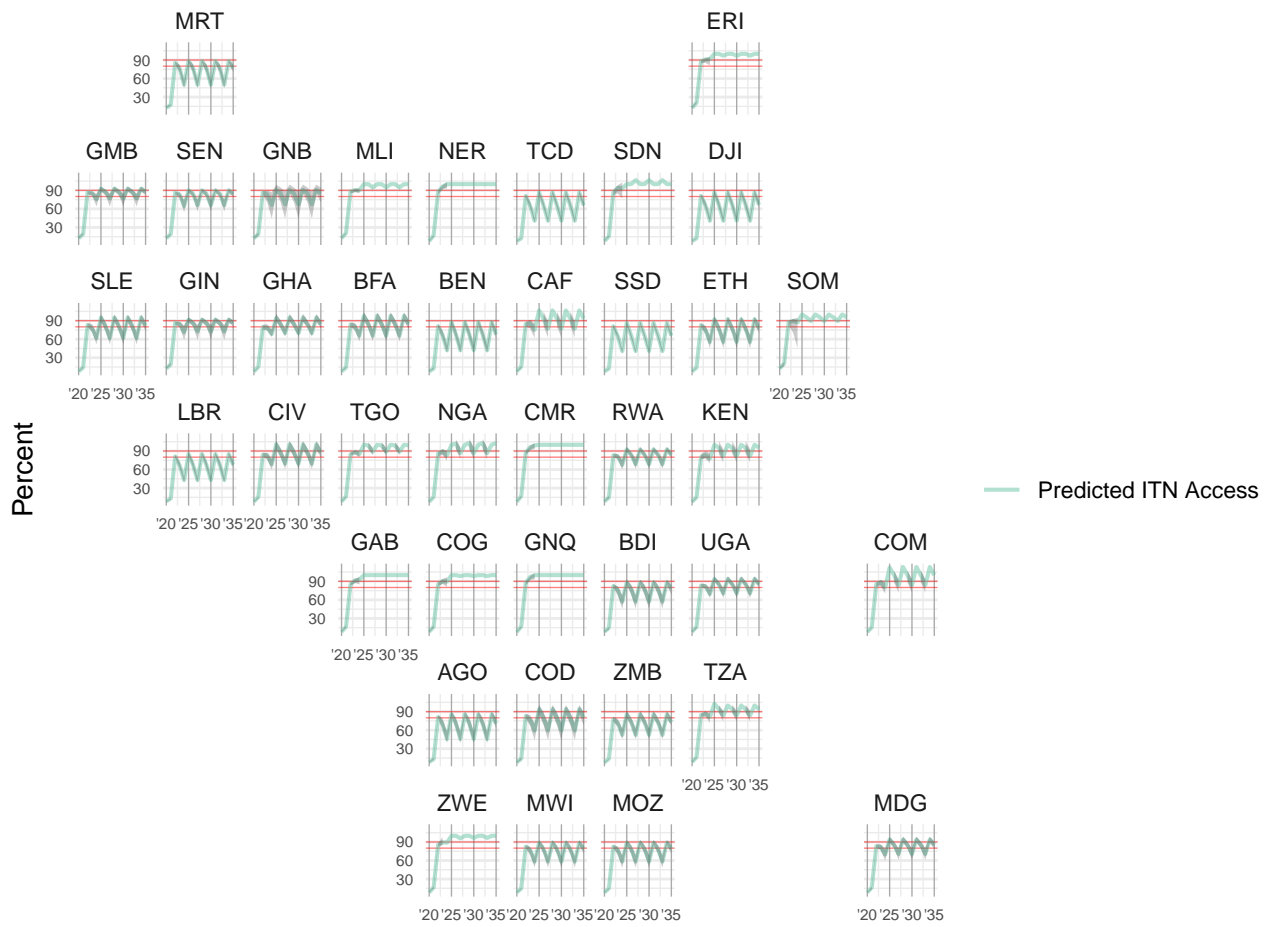

3-year mass campaigns with ANC/EPI at 6%  
and between-campaign school/community distribution  
at 12 % of the population

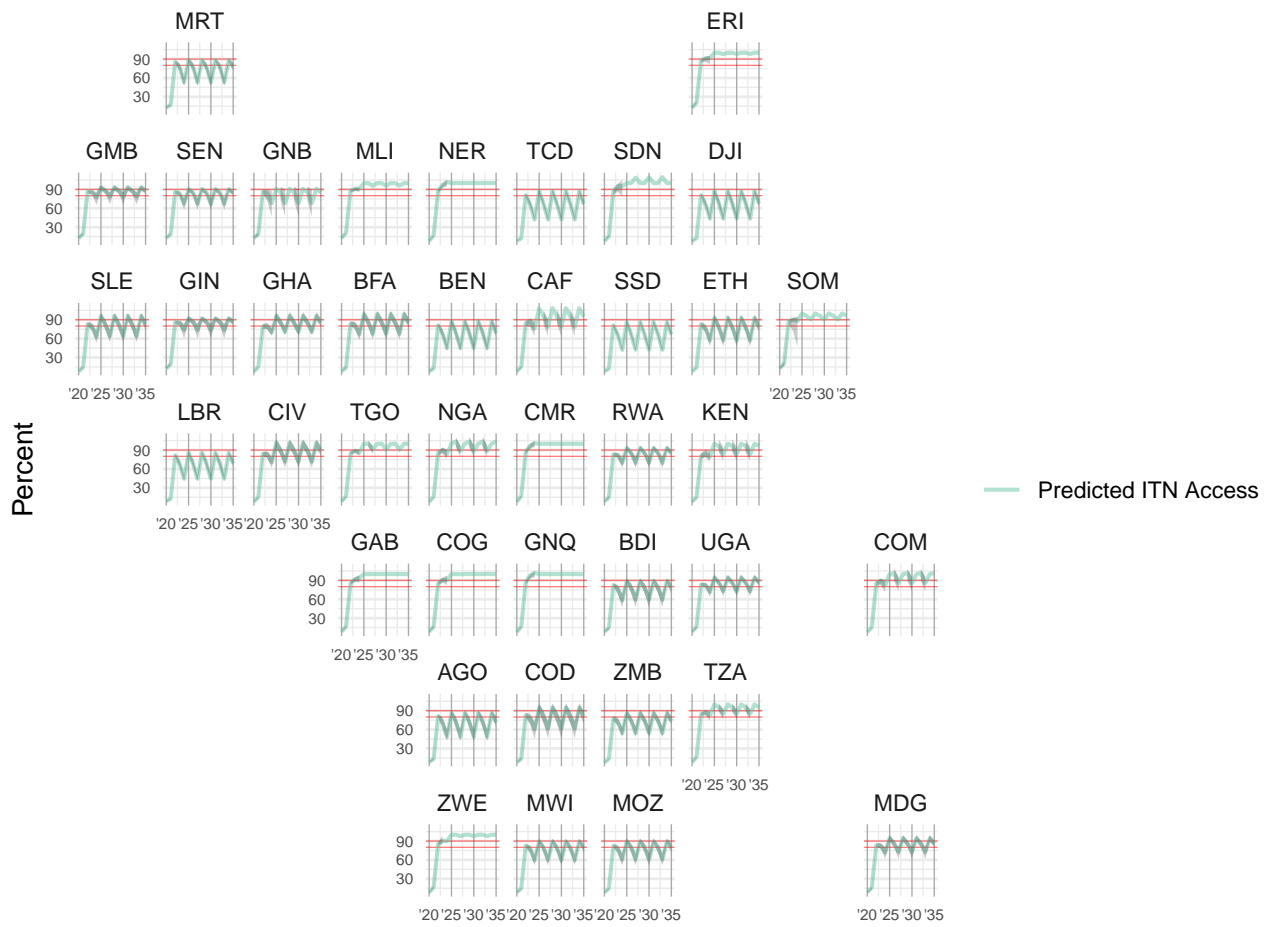

3-year mass campaigns with ANC/EPI at 6%  
and between-campaign school/community distribution  
at 13 % of the population

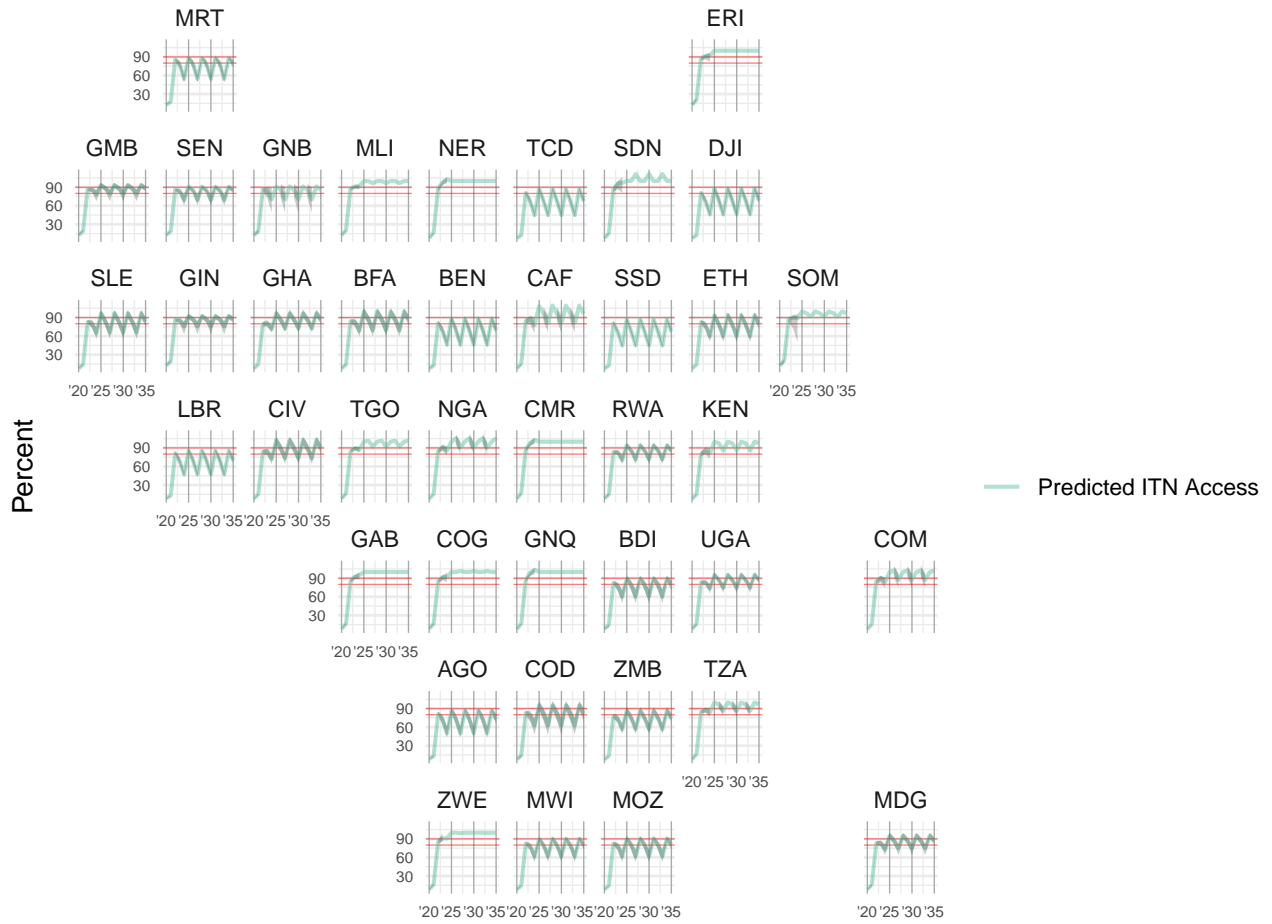

3-year mass campaigns with ANC/EPI at 6%  
and between-campaign school/community distribution  
at 14 % of the population

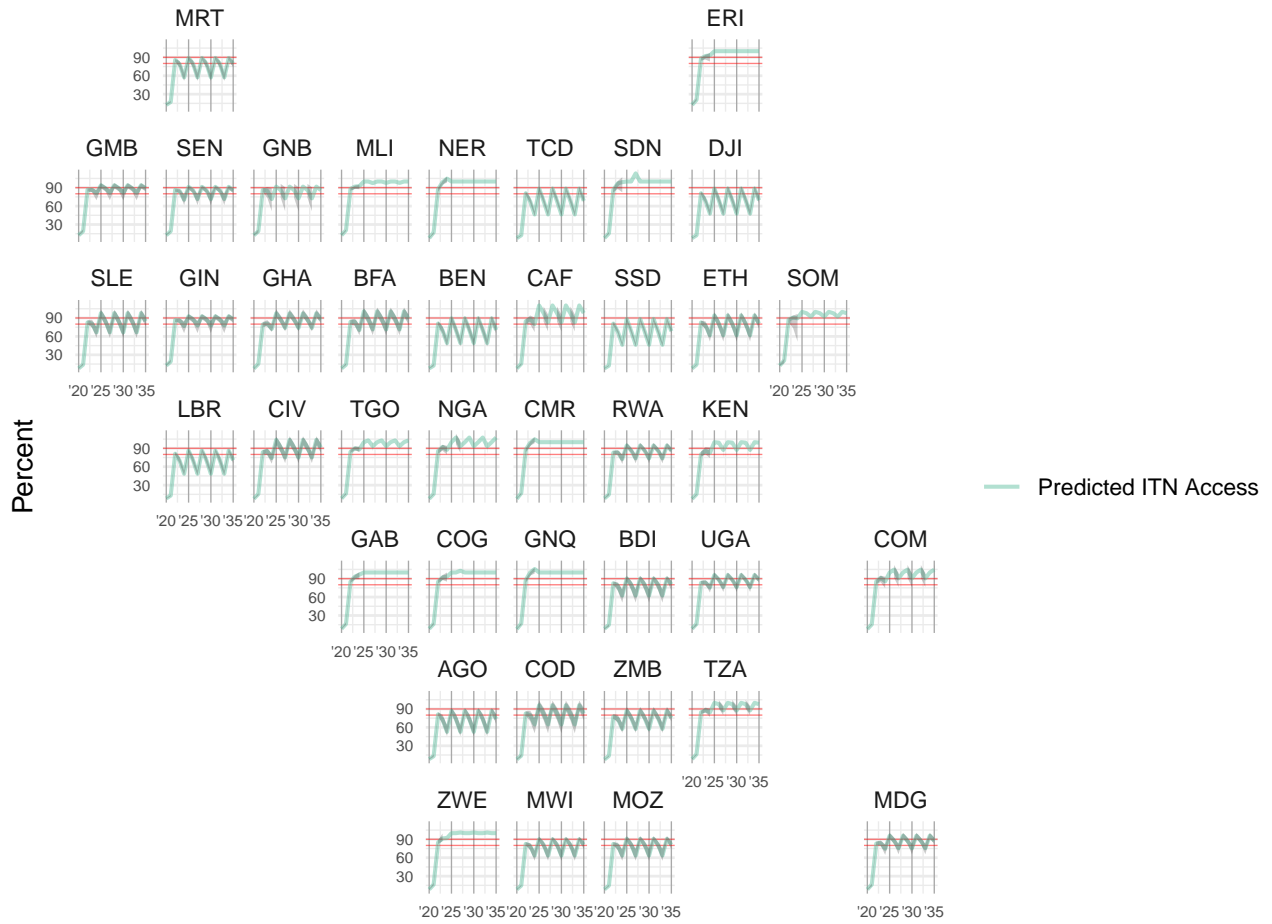

3-year mass campaigns with ANC/EPI at 6% and between-campaign school/community distribution at 15% of the population

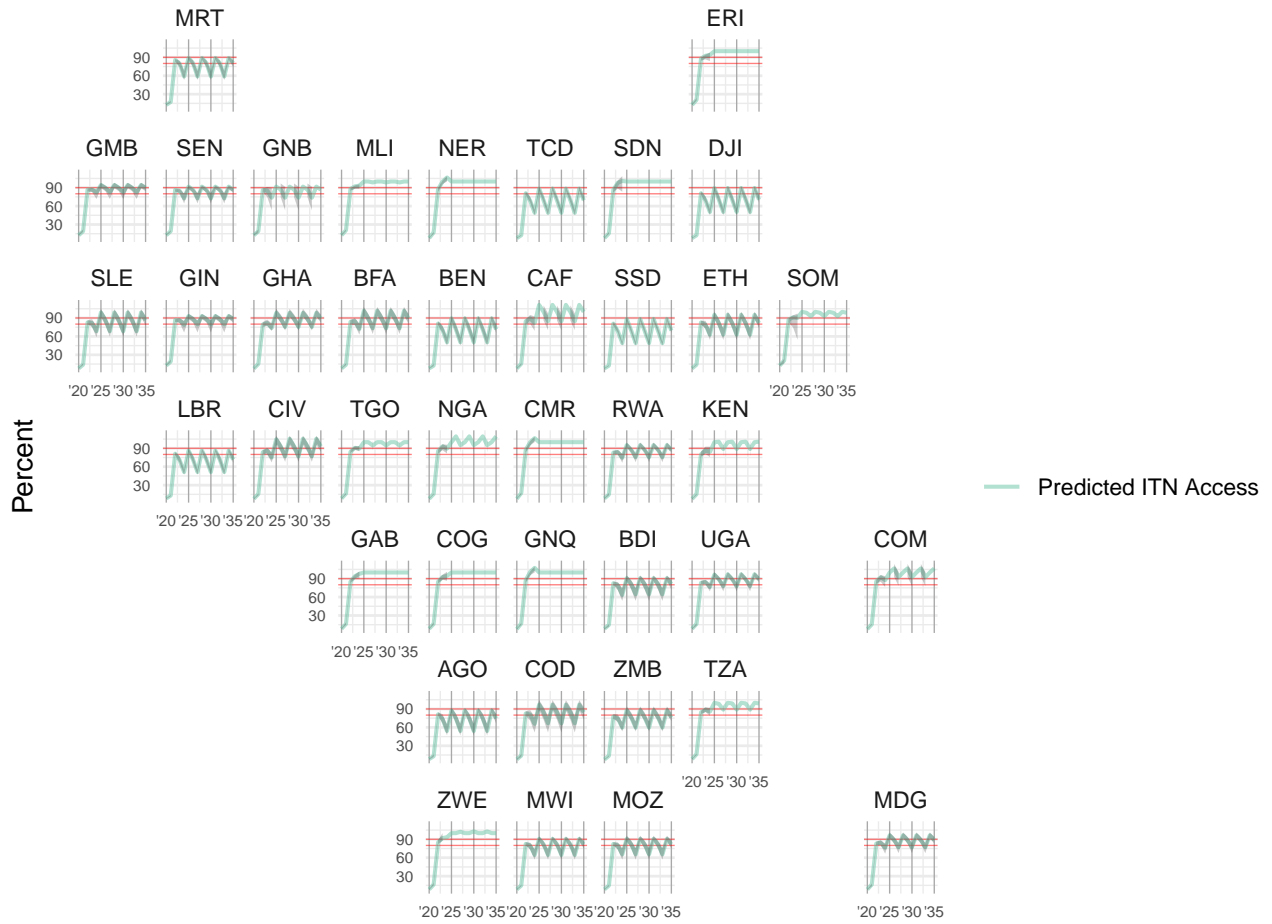

3-year mass campaigns with ANC/EPI at 6%  
and between-campaign school/community distribution  
at 16 % of the population

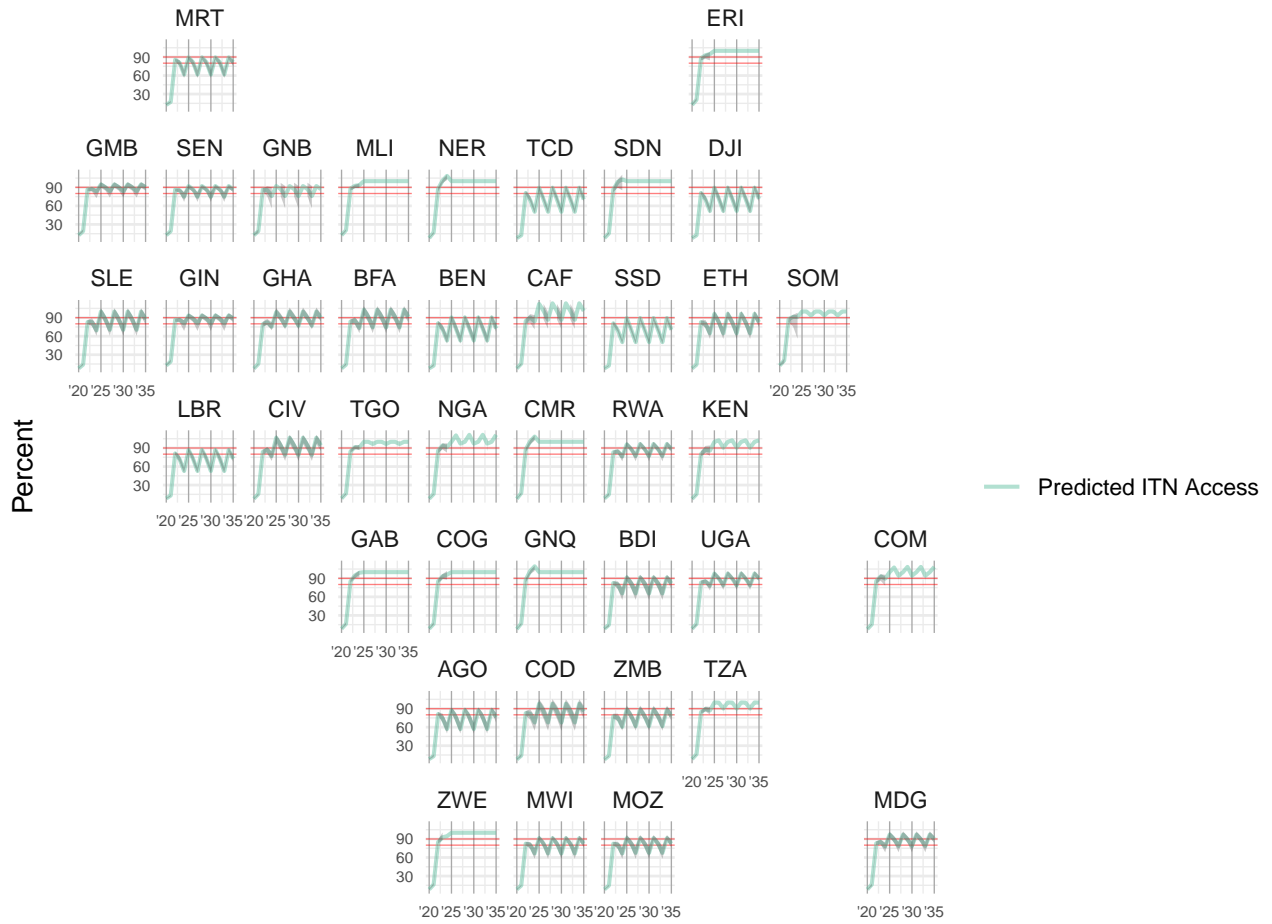



3-year mass campaigns with ANC/EPI at 6%  
and between-campaign school/community distribution  
at 17 % of the population

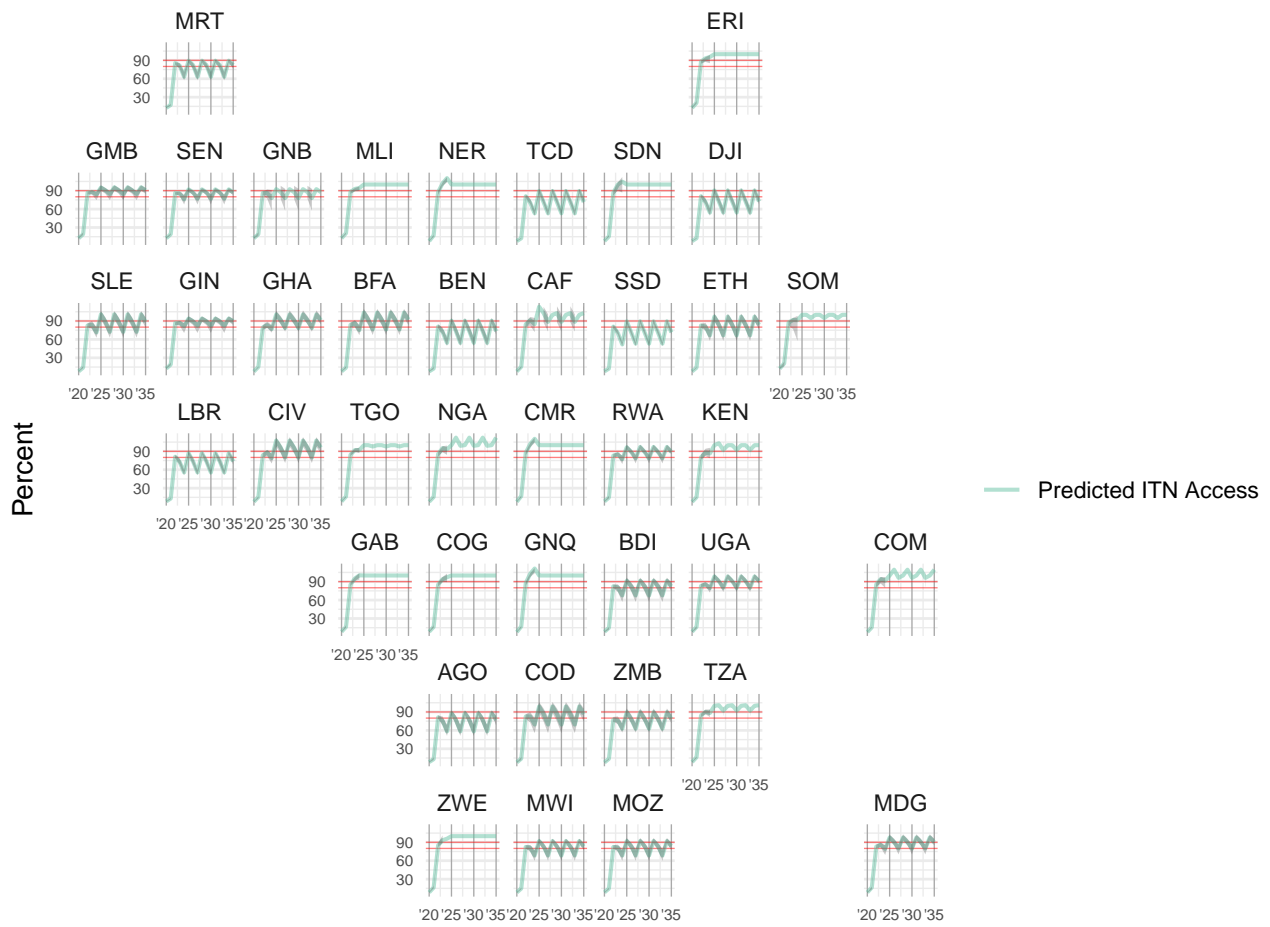

3-year mass campaigns with ANC/EPI at 6% and between-campaign school/community distribution at 18% of the population

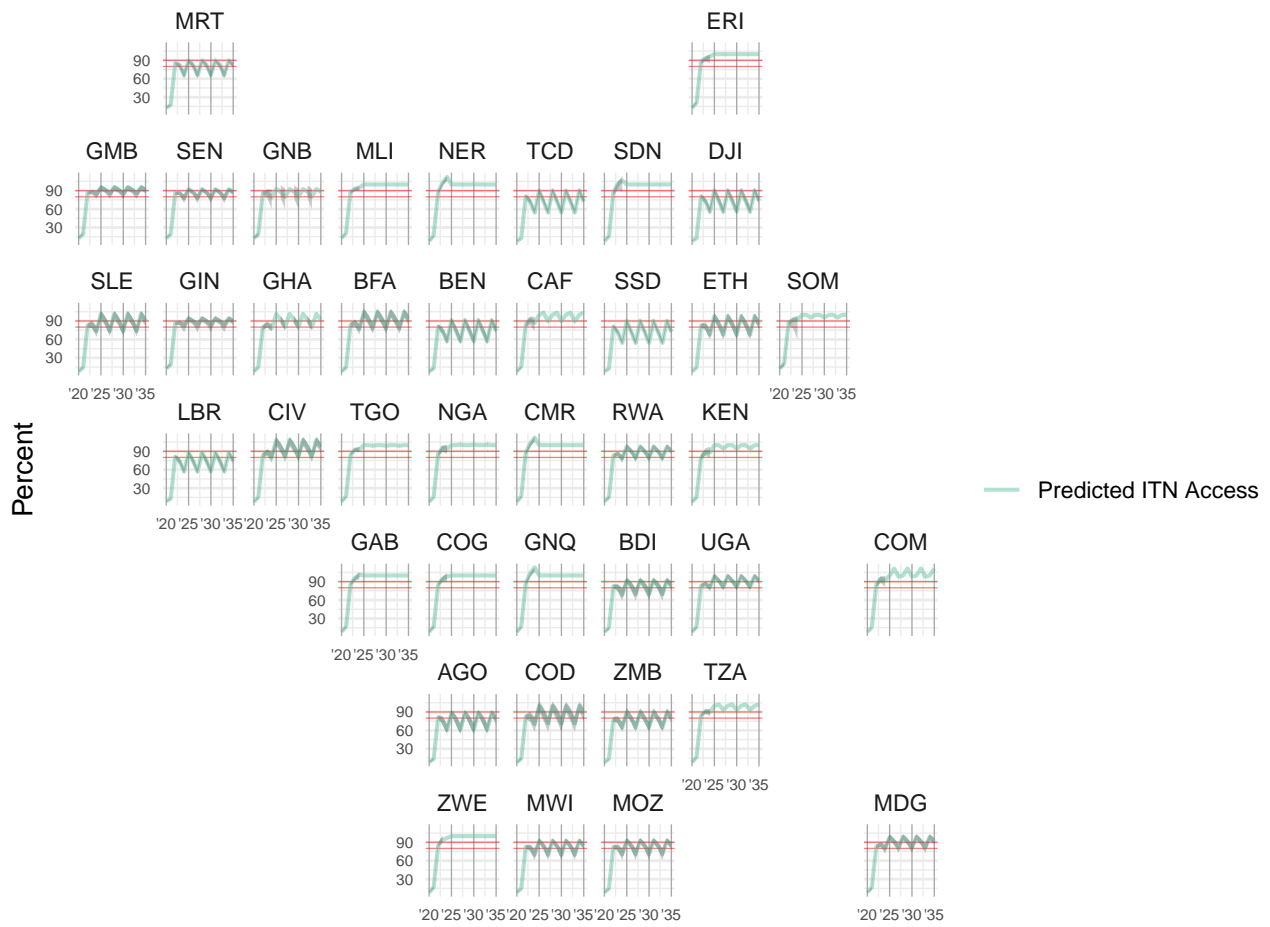

3-year mass campaigns with ANC/EPI at 6% and between-campaign school/community distribution at 19% of the population

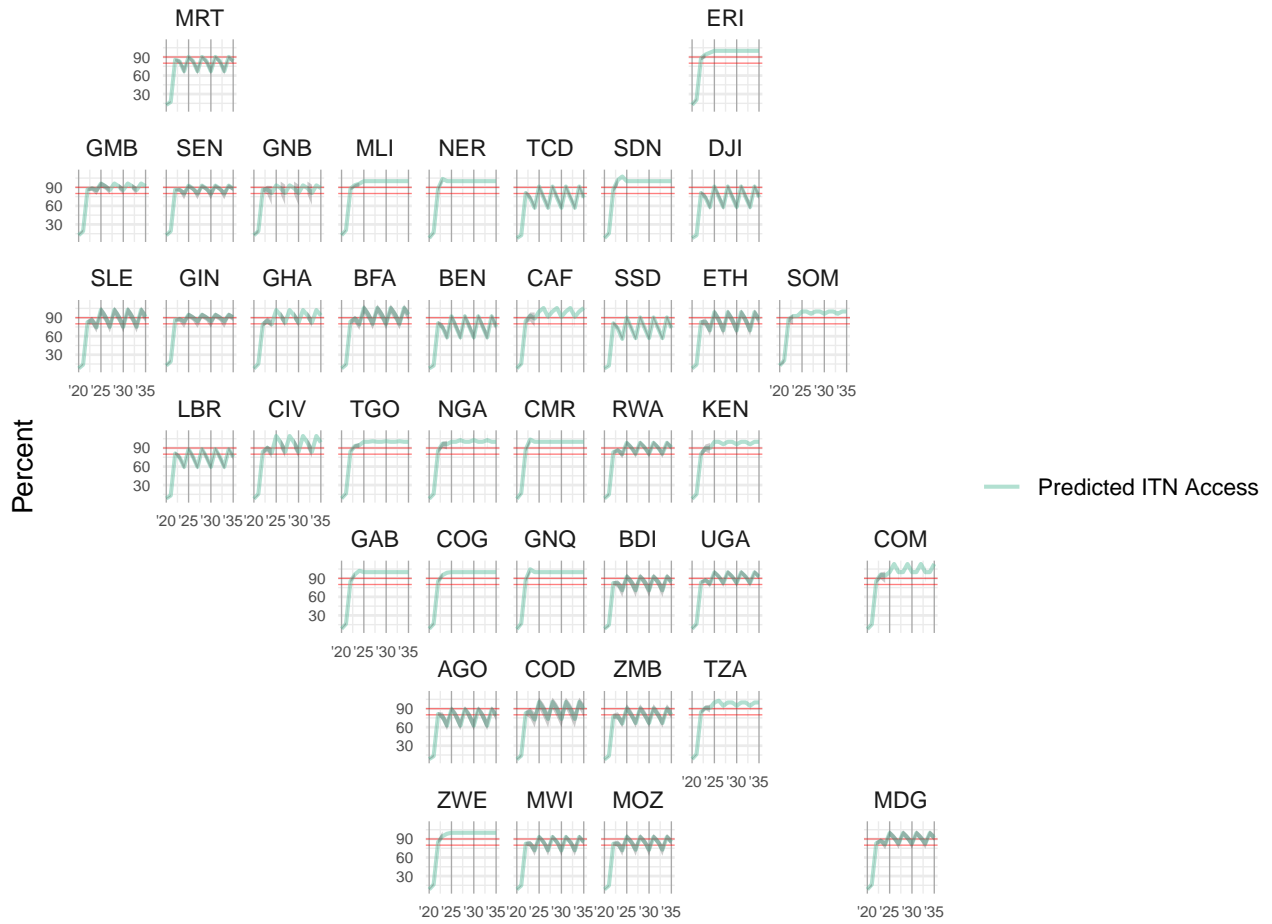



3-year mass campaigns with ANC/EPI at 6%  
and between-campaign school/community distribution  
at 21 % of the population

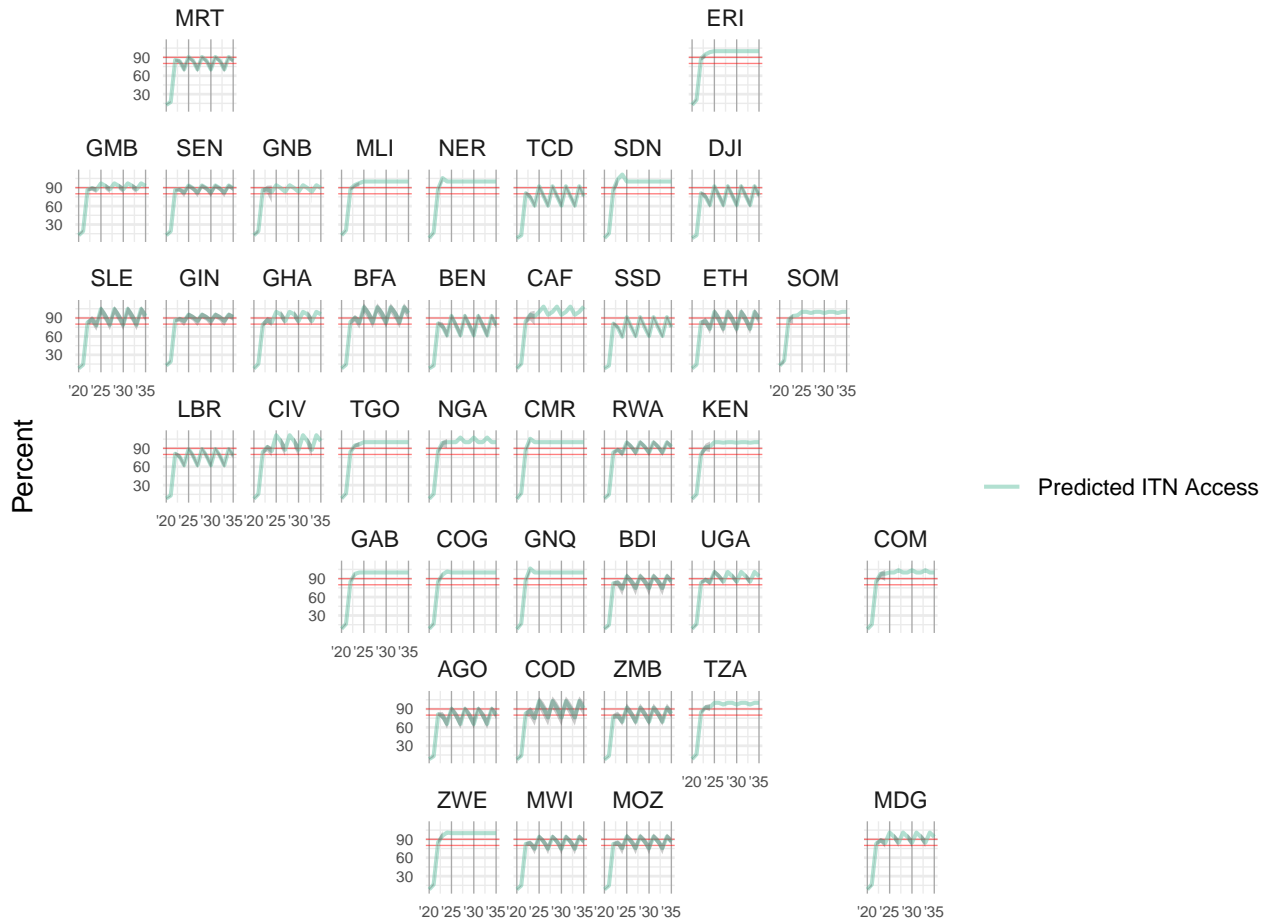

3-year mass campaigns with ANC/EPI at 6%  
and between-campaign school/community distribution  
at 22 % of the population

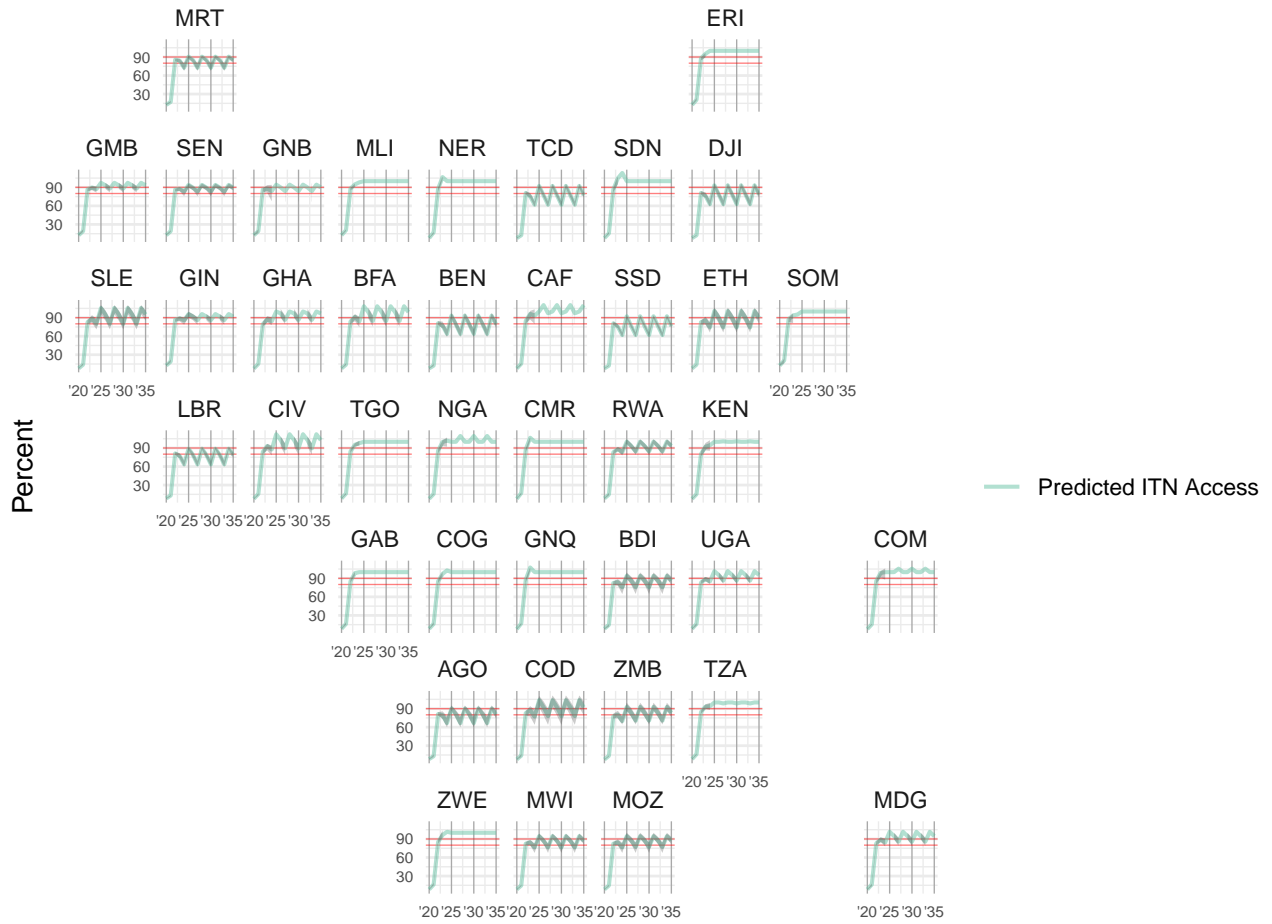

3-year mass campaigns with ANC/EPI at 6%  
and between-campaign school/community distribution  
at 23 % of the population

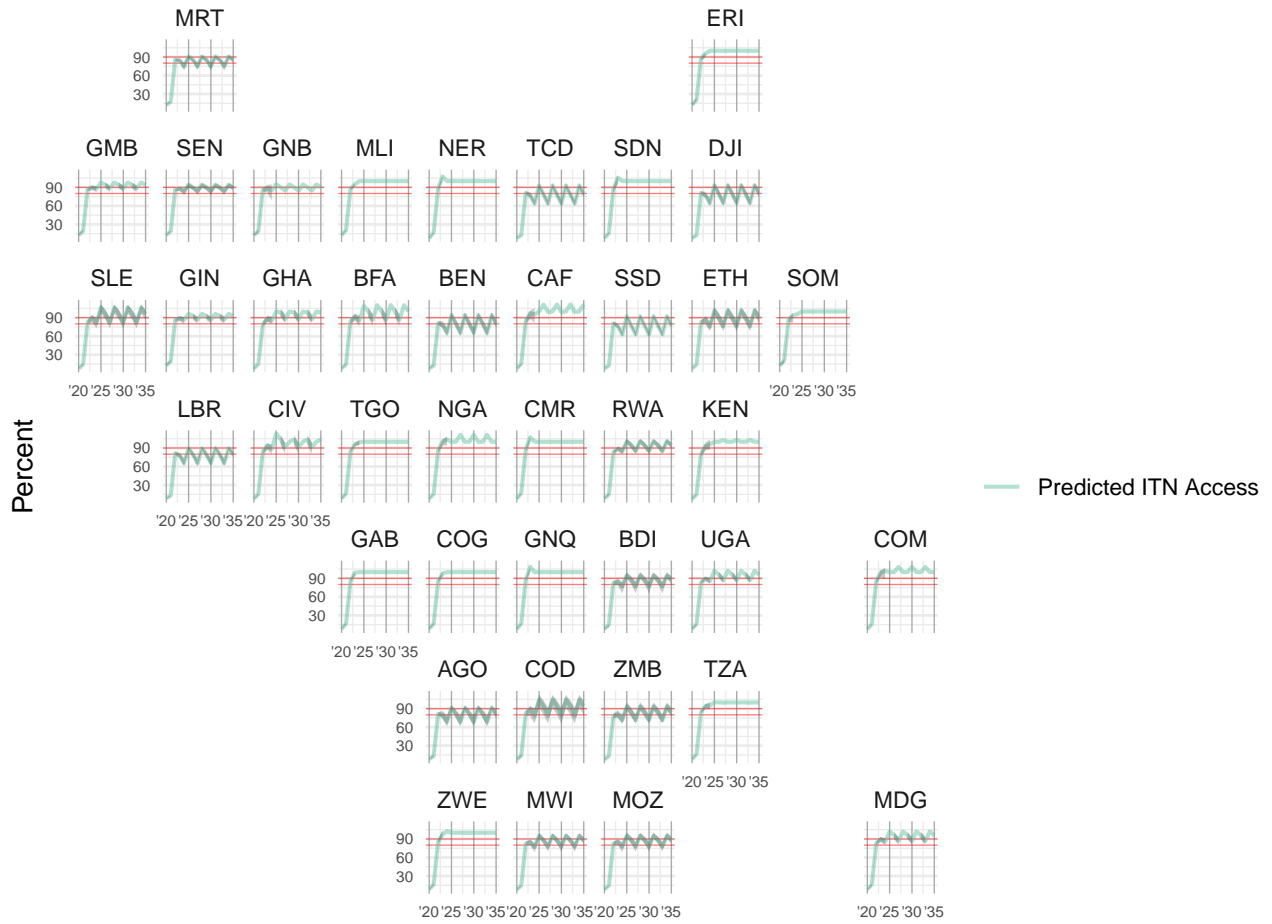

3-year mass campaigns with ANC/EPI at 6% and between-campaign school/community distribution at 24% of the population

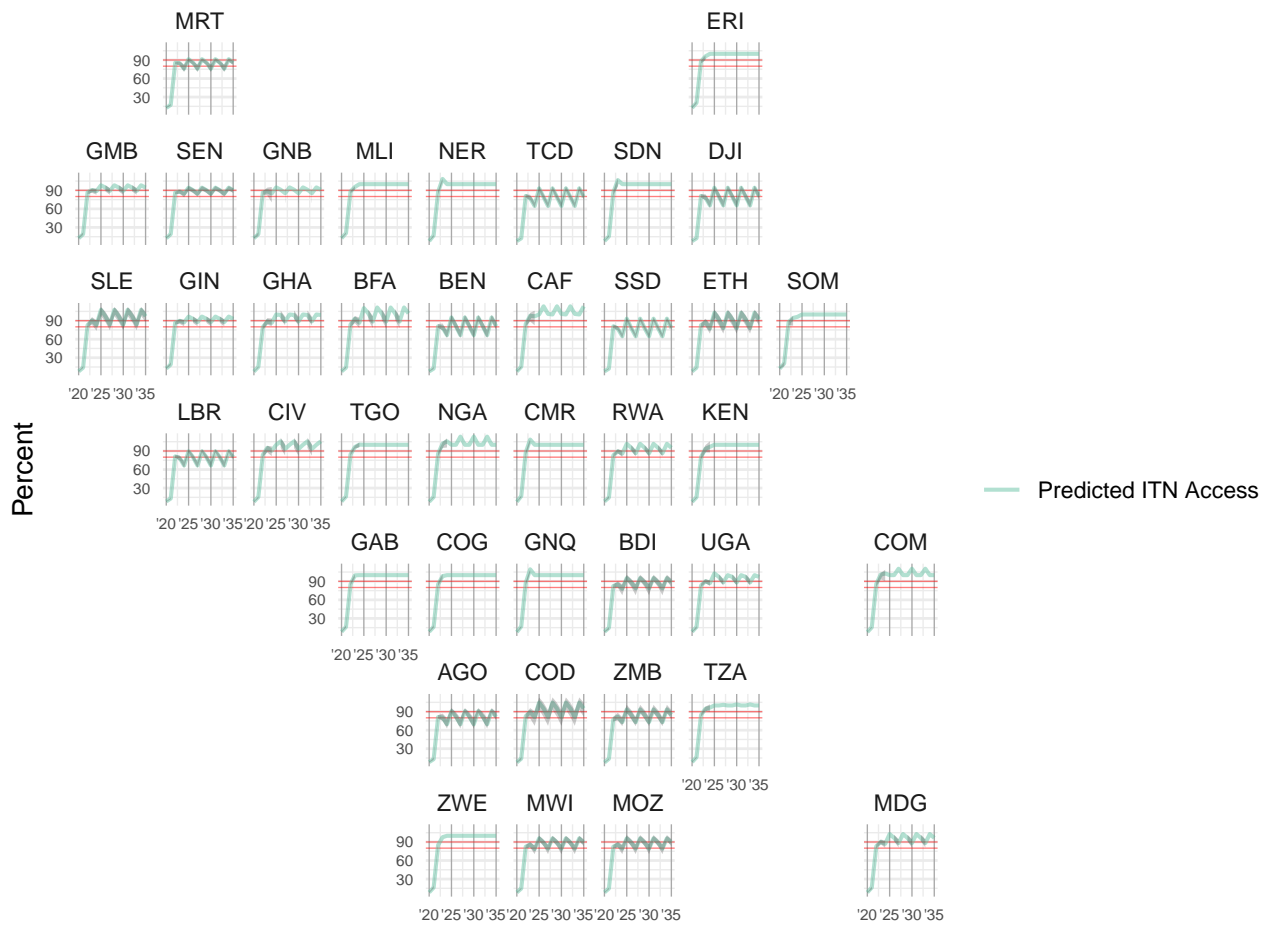



3-year mass campaigns with ANC/EPI at 6%  
and between-campaign school/community distribution  
at 25 % of the population

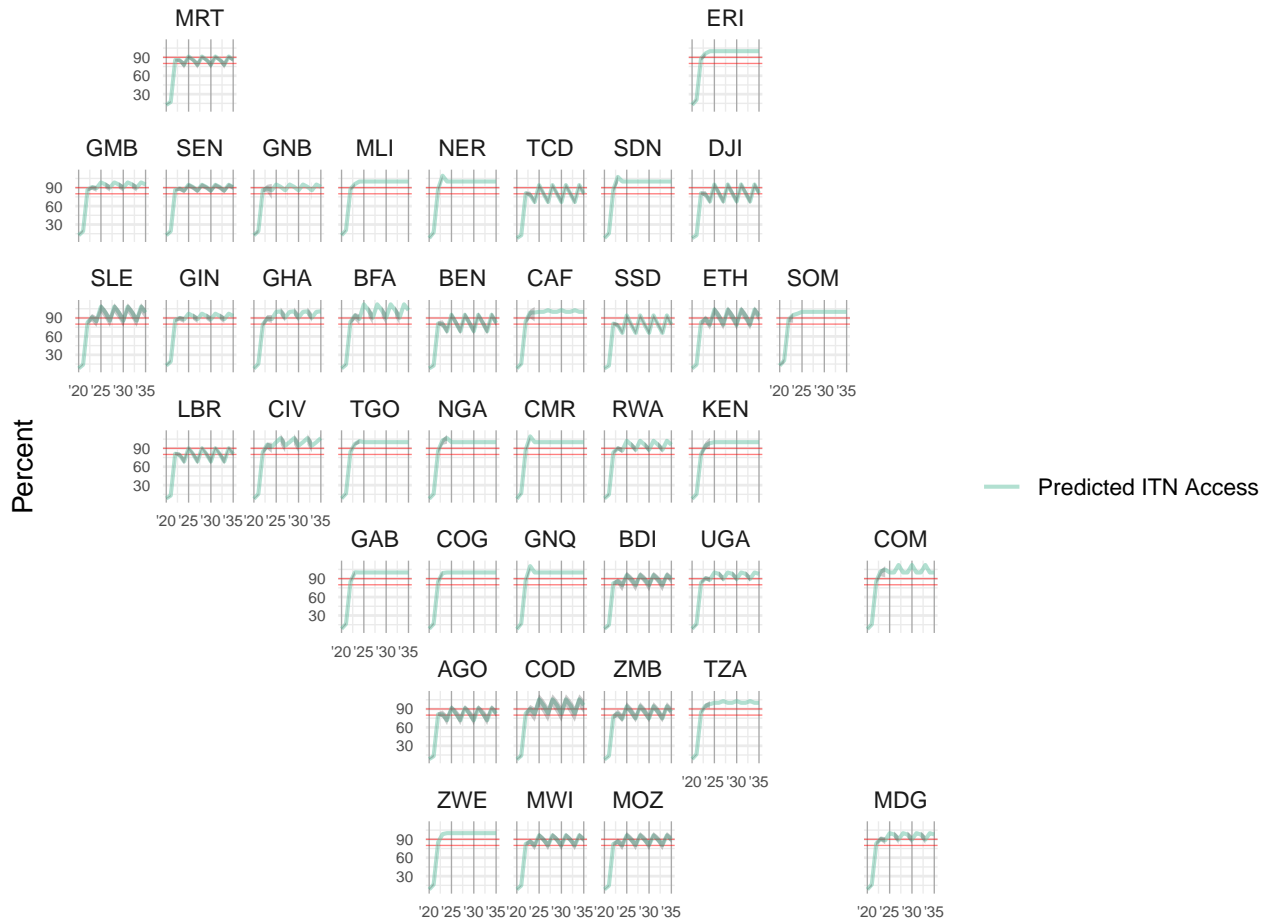

3-year mass campaigns with ANC/EPI at 6% and between-campaign school/community distribution at 26% of the population

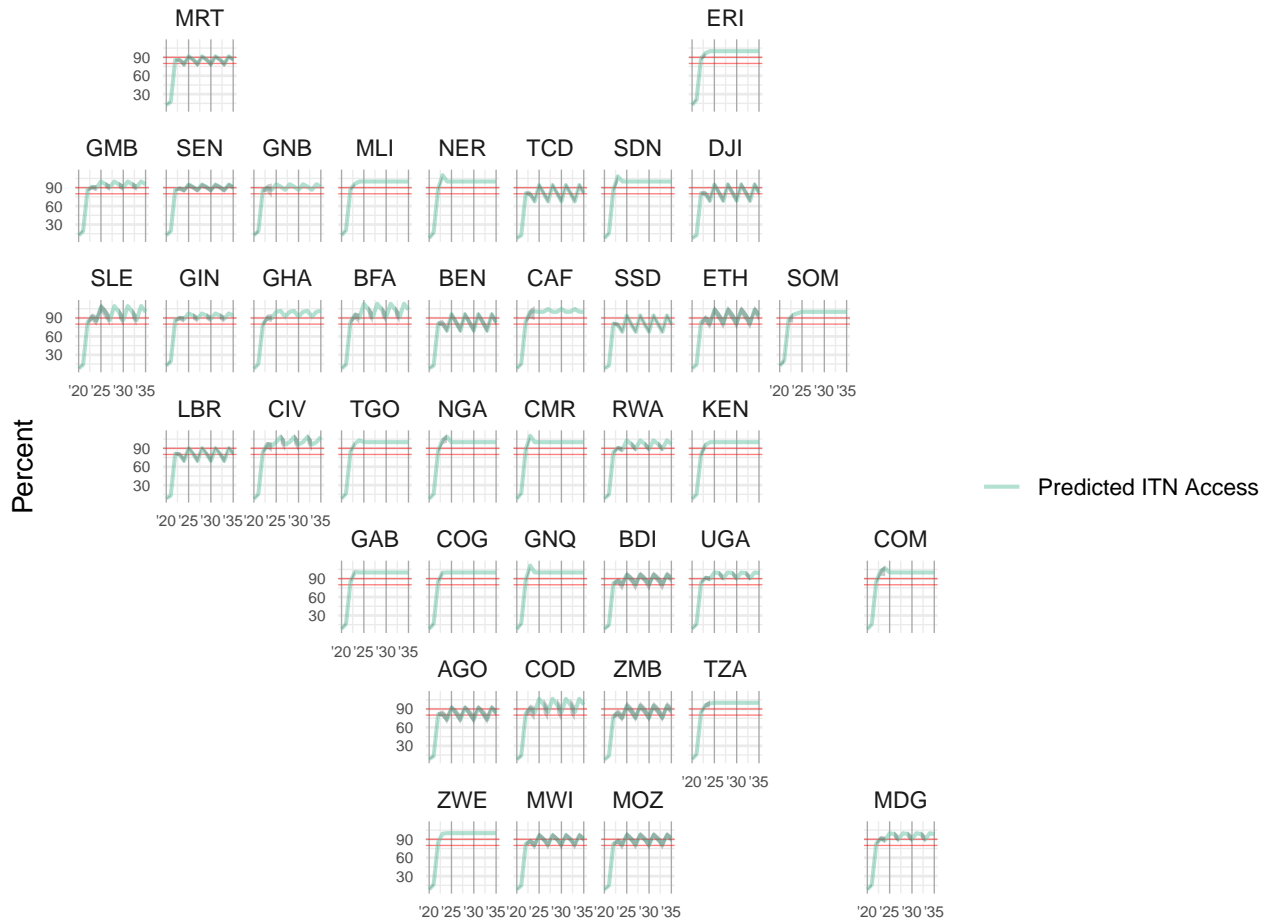

3-year mass campaigns with ANC/EPI at 6% and between-campaign school/community distribution at 27% of the population

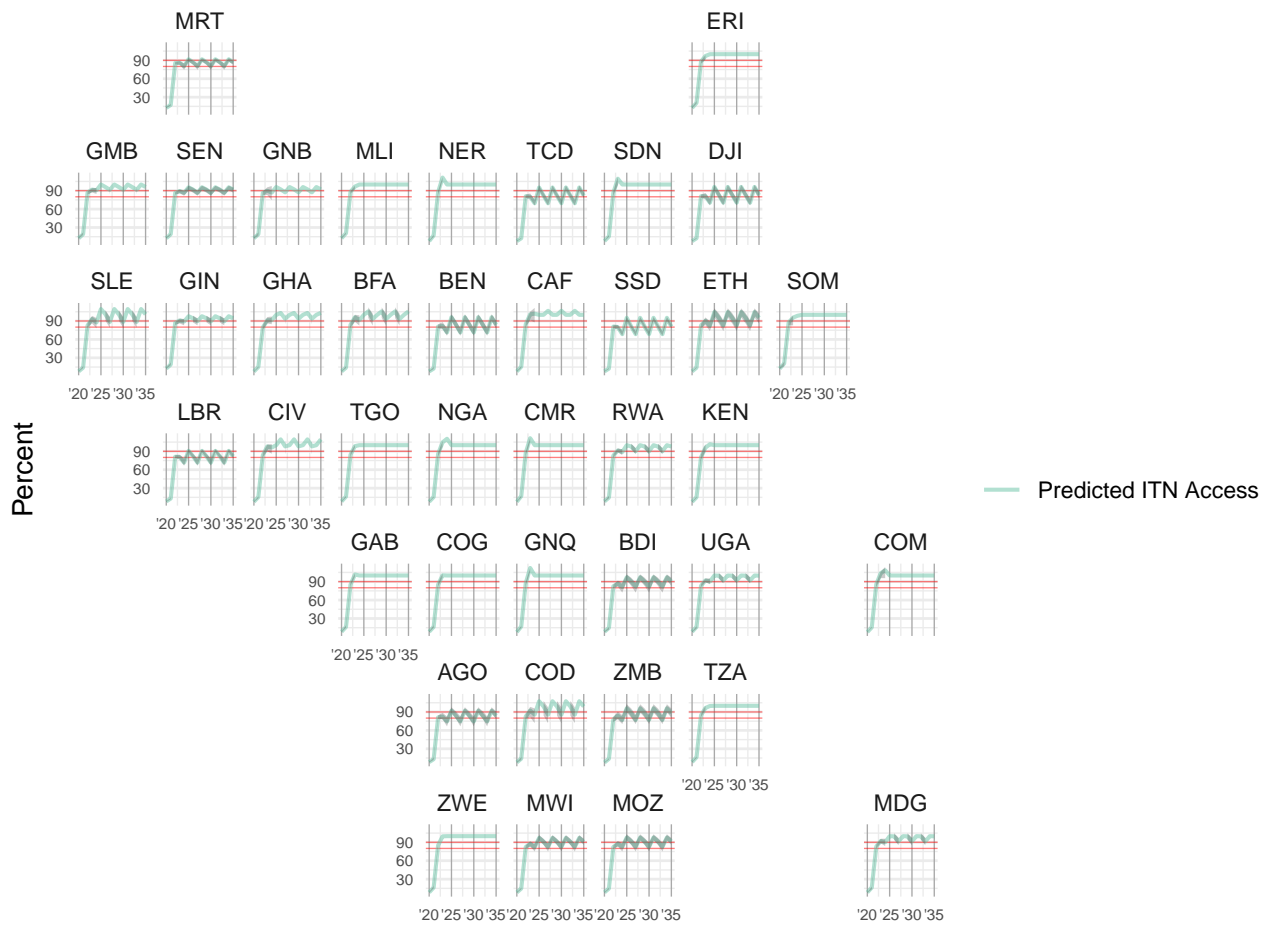

3-year mass campaigns with ANC/EPI at 6% and between-campaign school/community distribution at 28% of the population

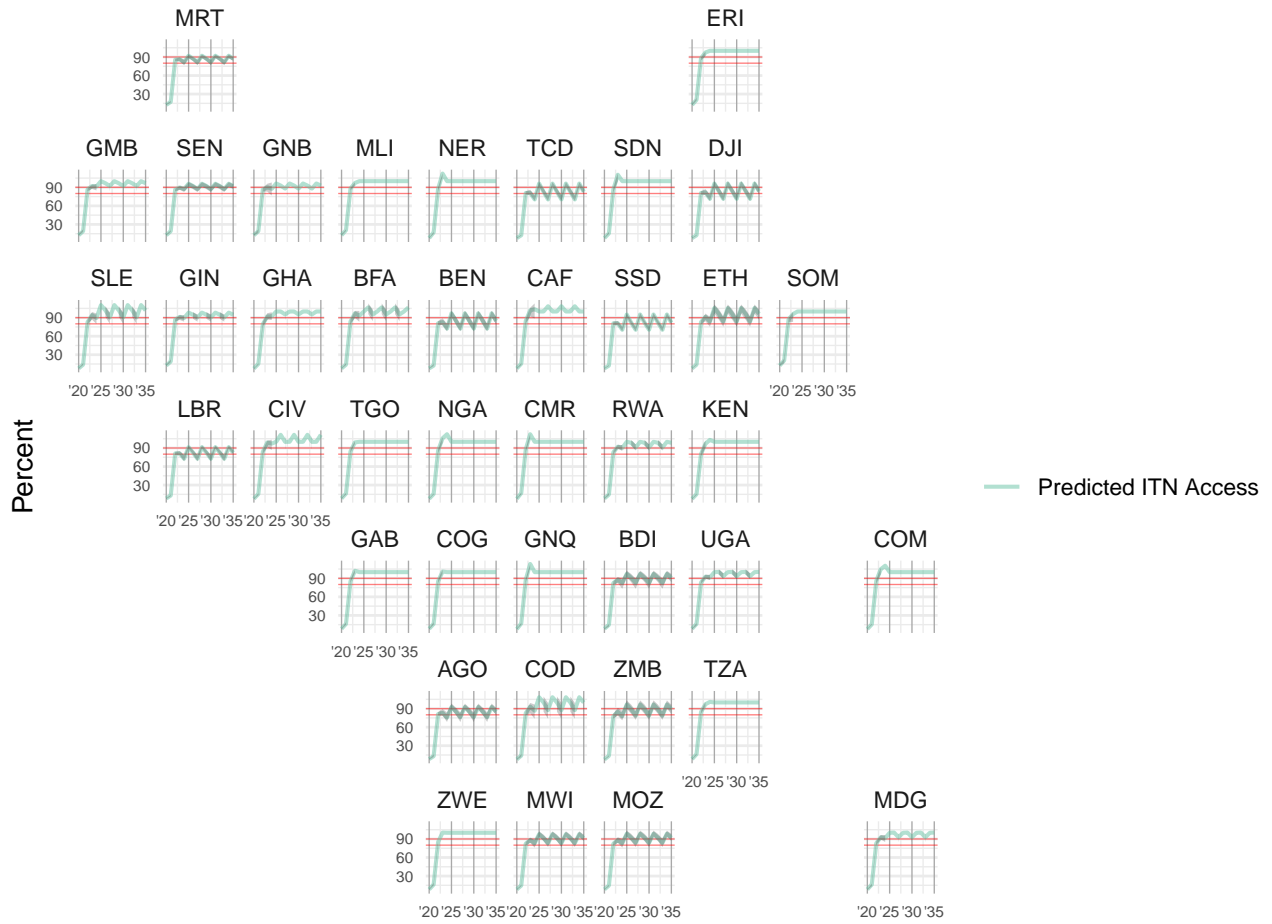



3-year mass campaigns with ANC/EPI at 6% and between-campaign school/community distribution at 30% of the population

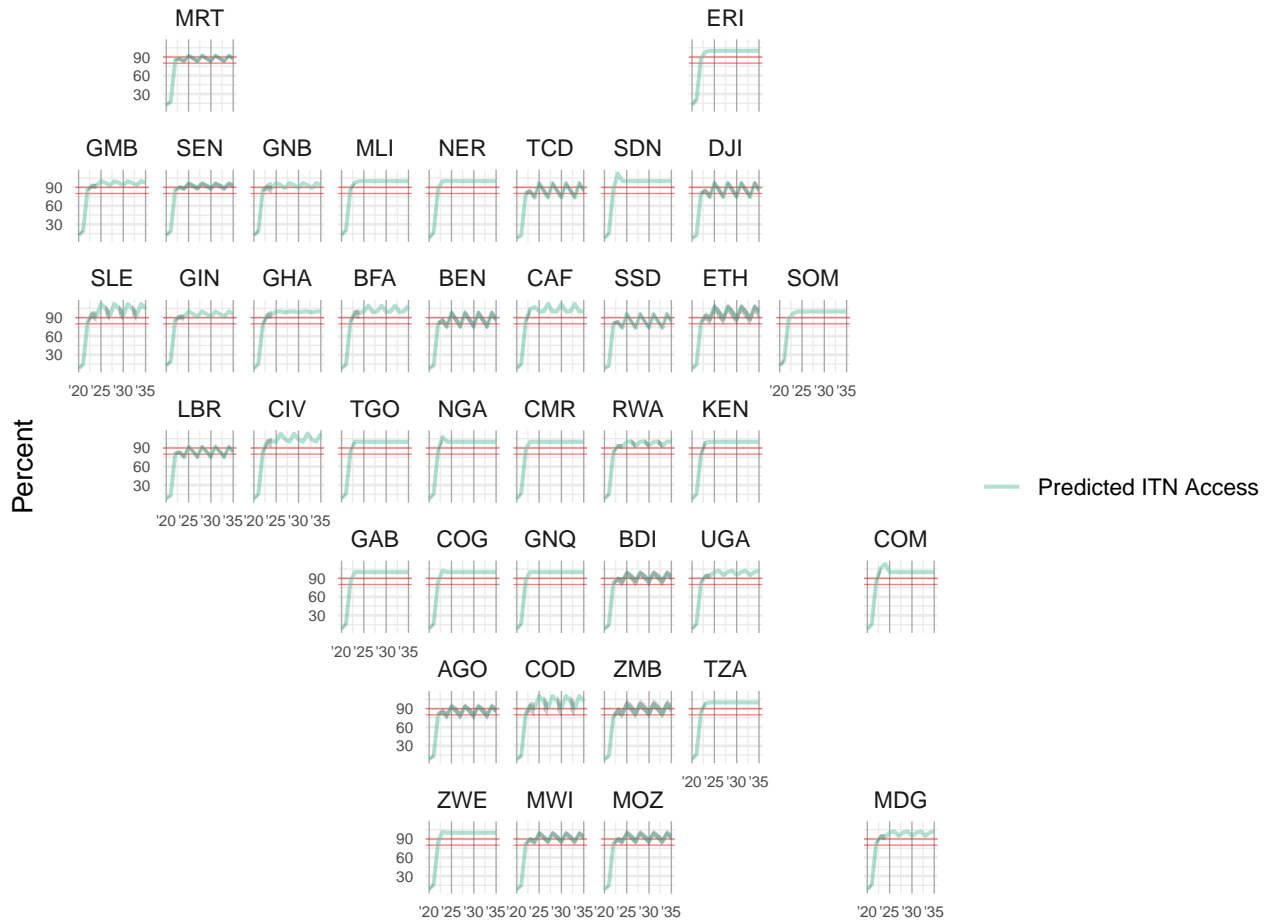

3-year mass campaigns with ANC/EPI at 6%  
and between-campaign school/community distribution  
at 31 % of the population

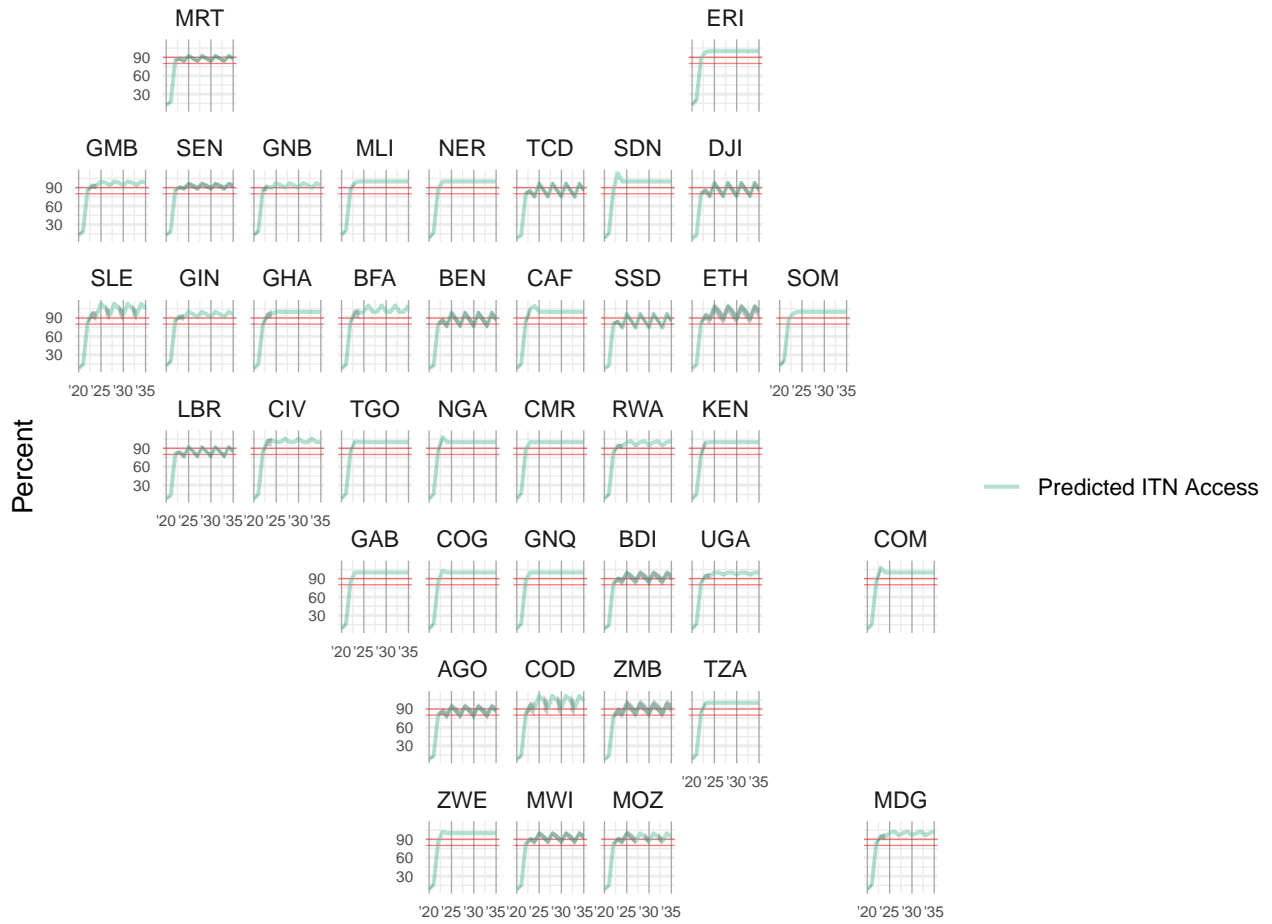

3-year mass campaigns with ANC/EPI at 6% and between-campaign school/community distribution at 32% of the population

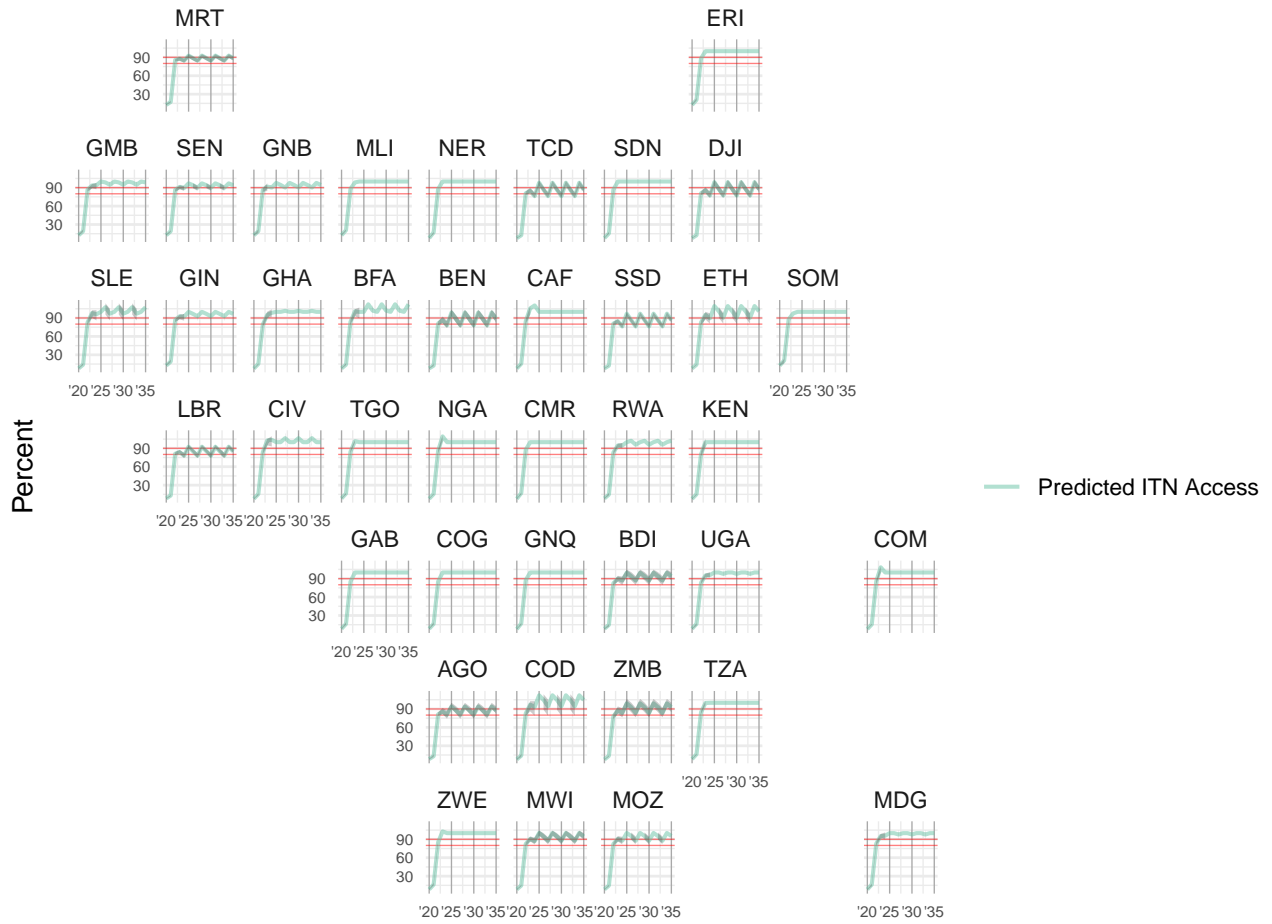















3-year mass campaigns with ANC/EPI at 6%  
and between-campaign school/community distribution  
at 39 % of the population

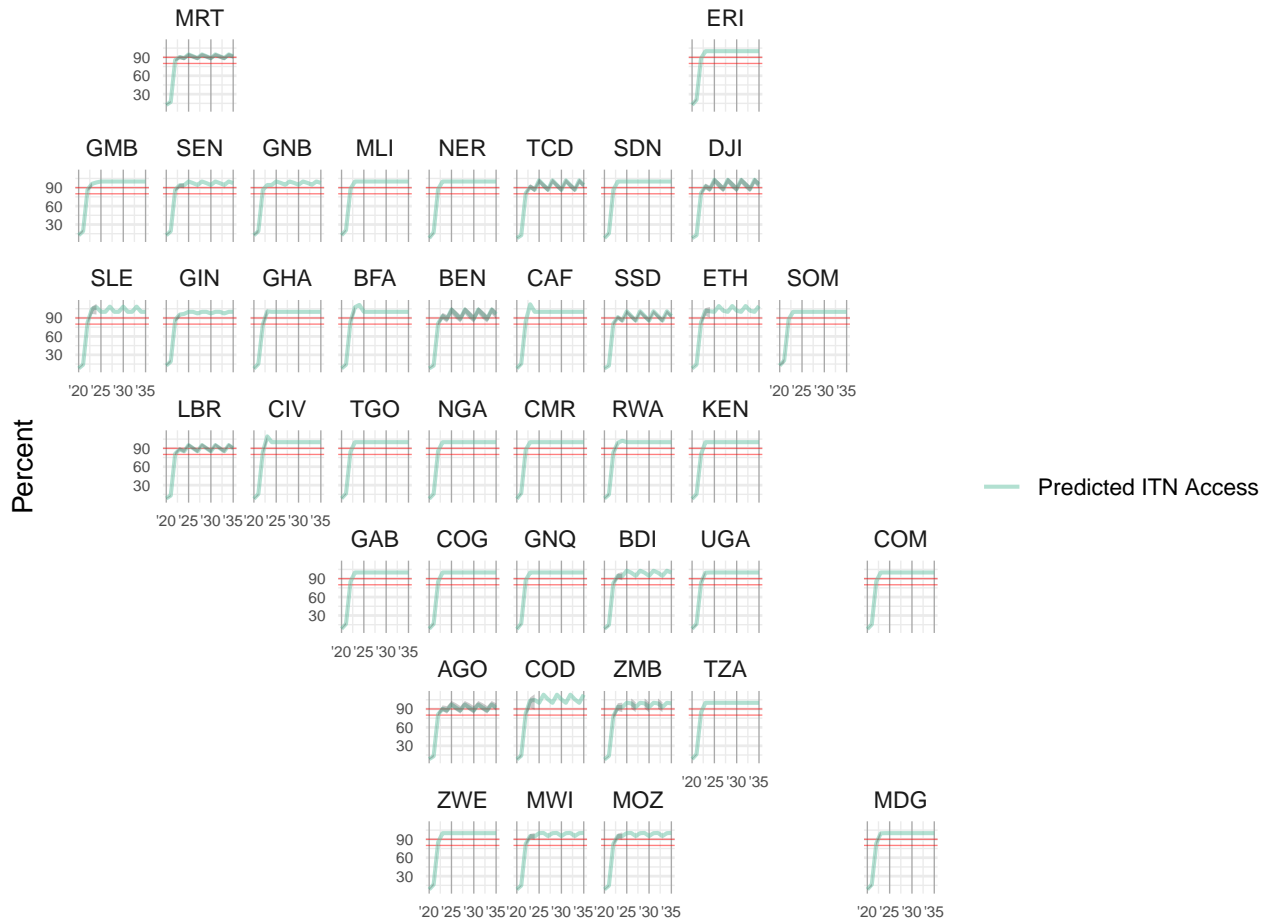

3-year mass campaigns with ANC/EPI at 6%  
and between-campaign school/community distribution  
at 40 % of the population

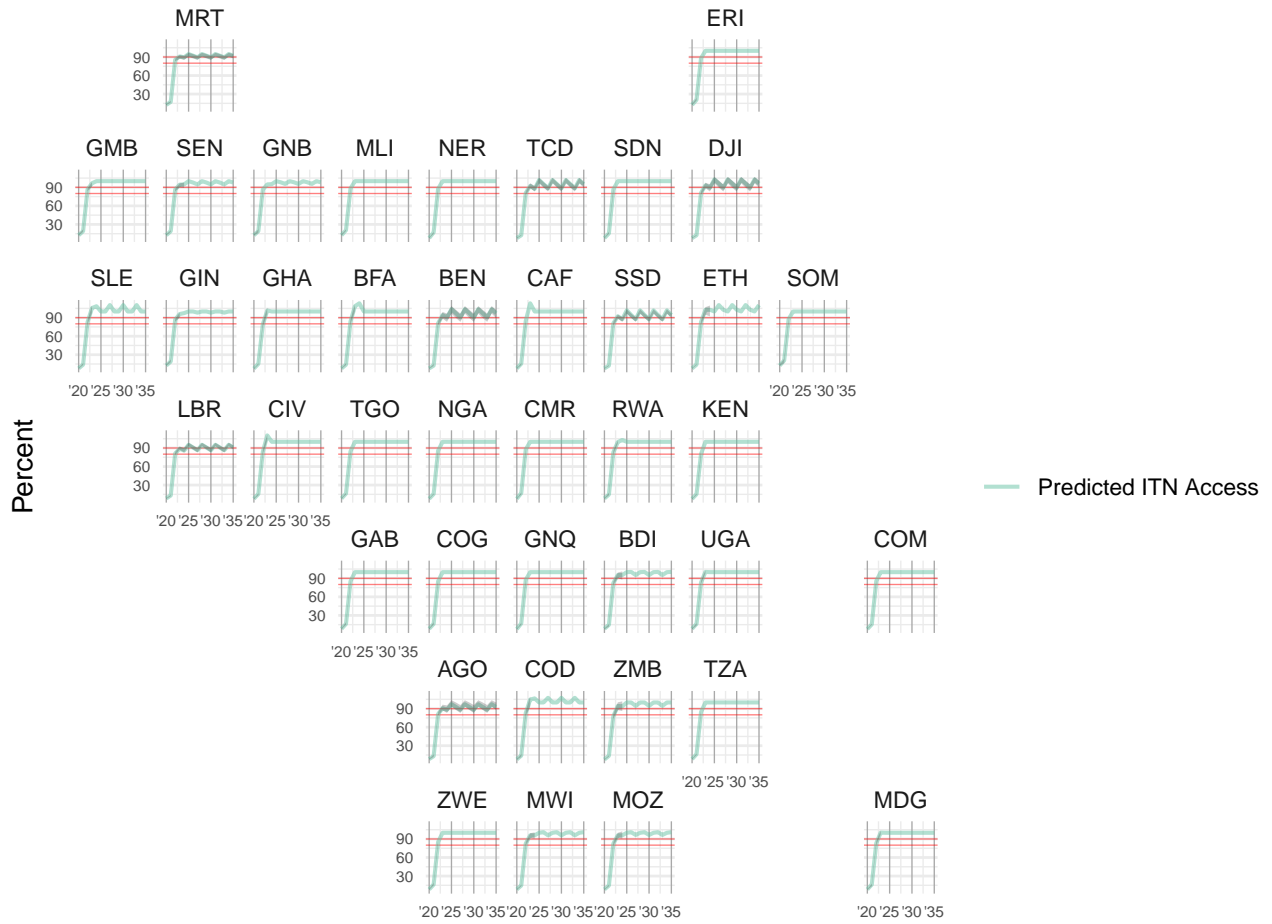



#### 4 Scenario 4 - Three-year mass campaigns with ANC/EPI distribution at 6%, varying campaign quantifier

3-year mass campaigns with ANC/EPI, at population / 0.1

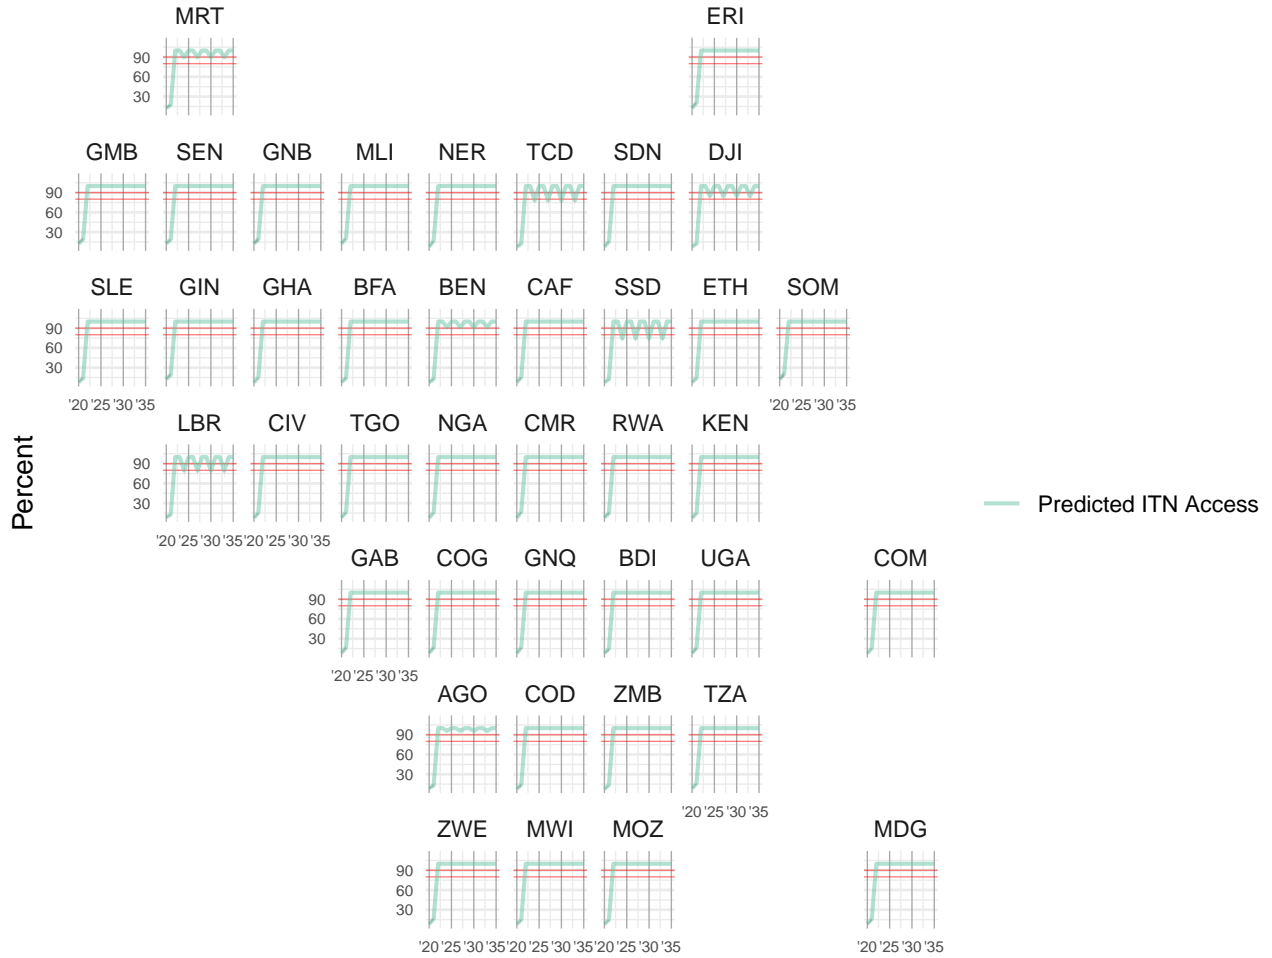

3-year mass campaigns with ANC/EPI,  
at population / 0.2

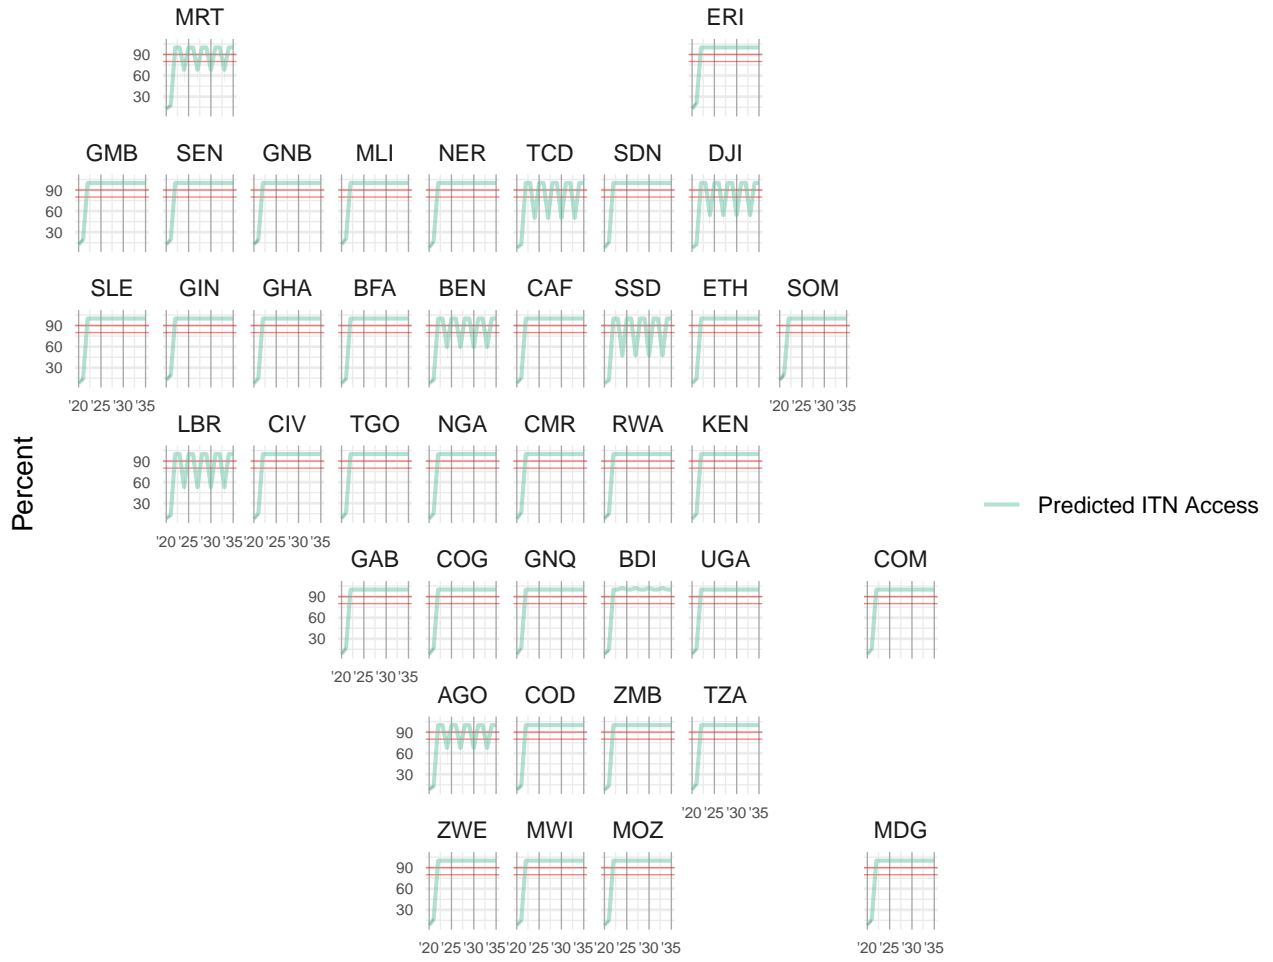

### 3-year mass campaigns with ANC/EPI, at population / 0.3

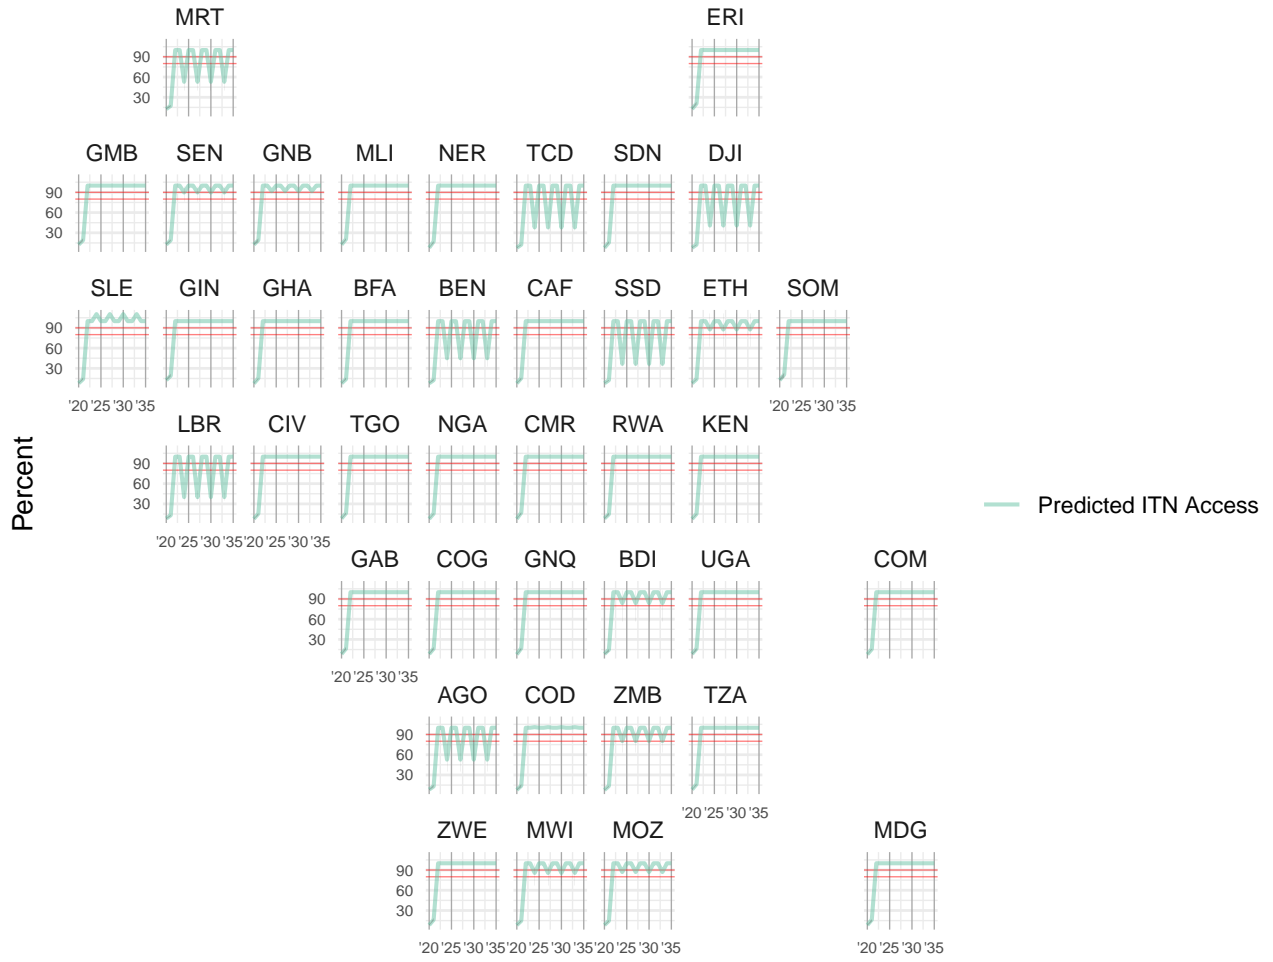

3-year mass campaigns with ANC/EPI,  
at population / 0.4

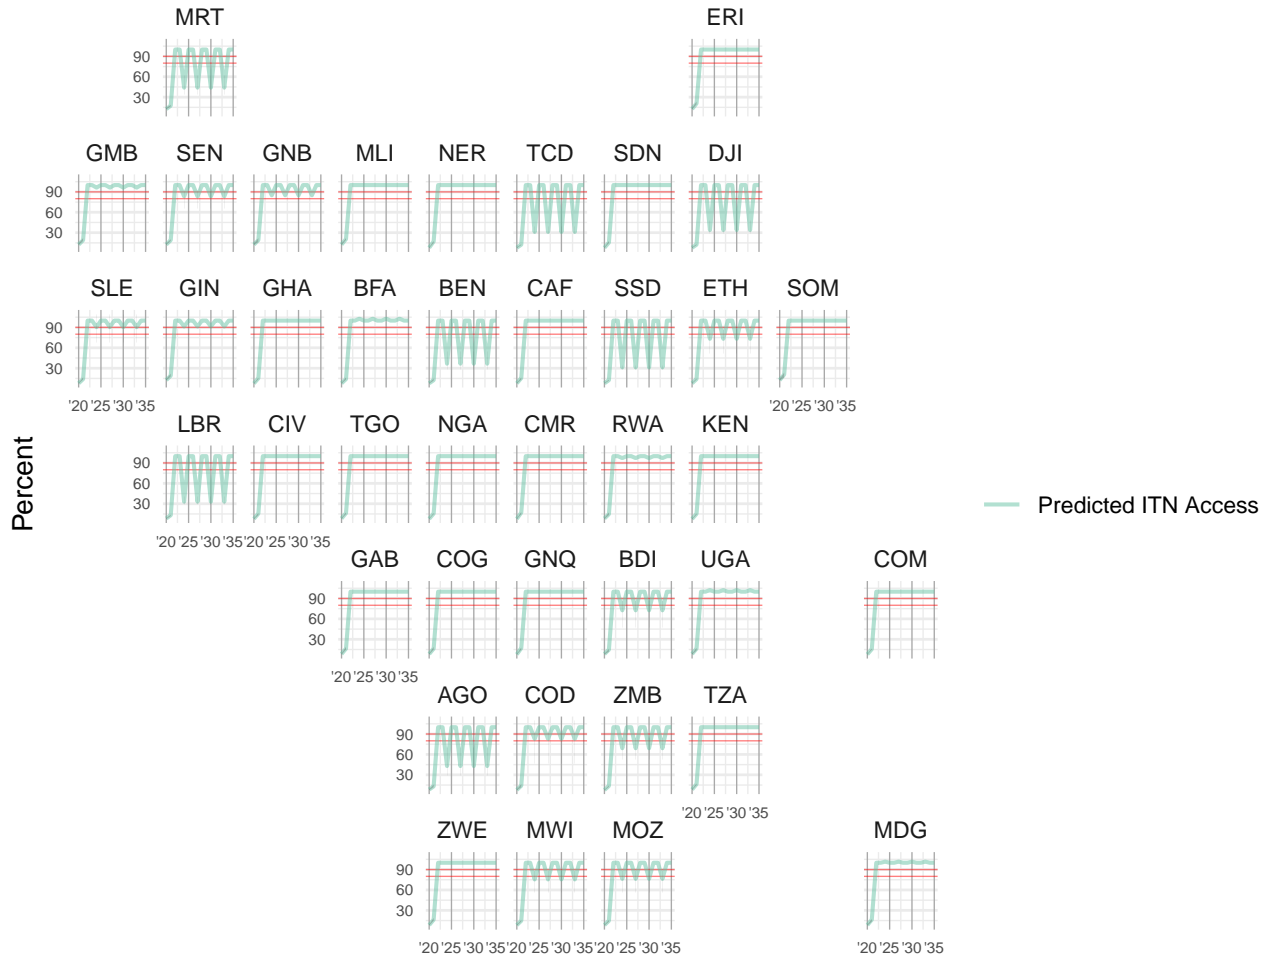

### 3-year mass campaigns with ANC/EPI, at population / 0.5

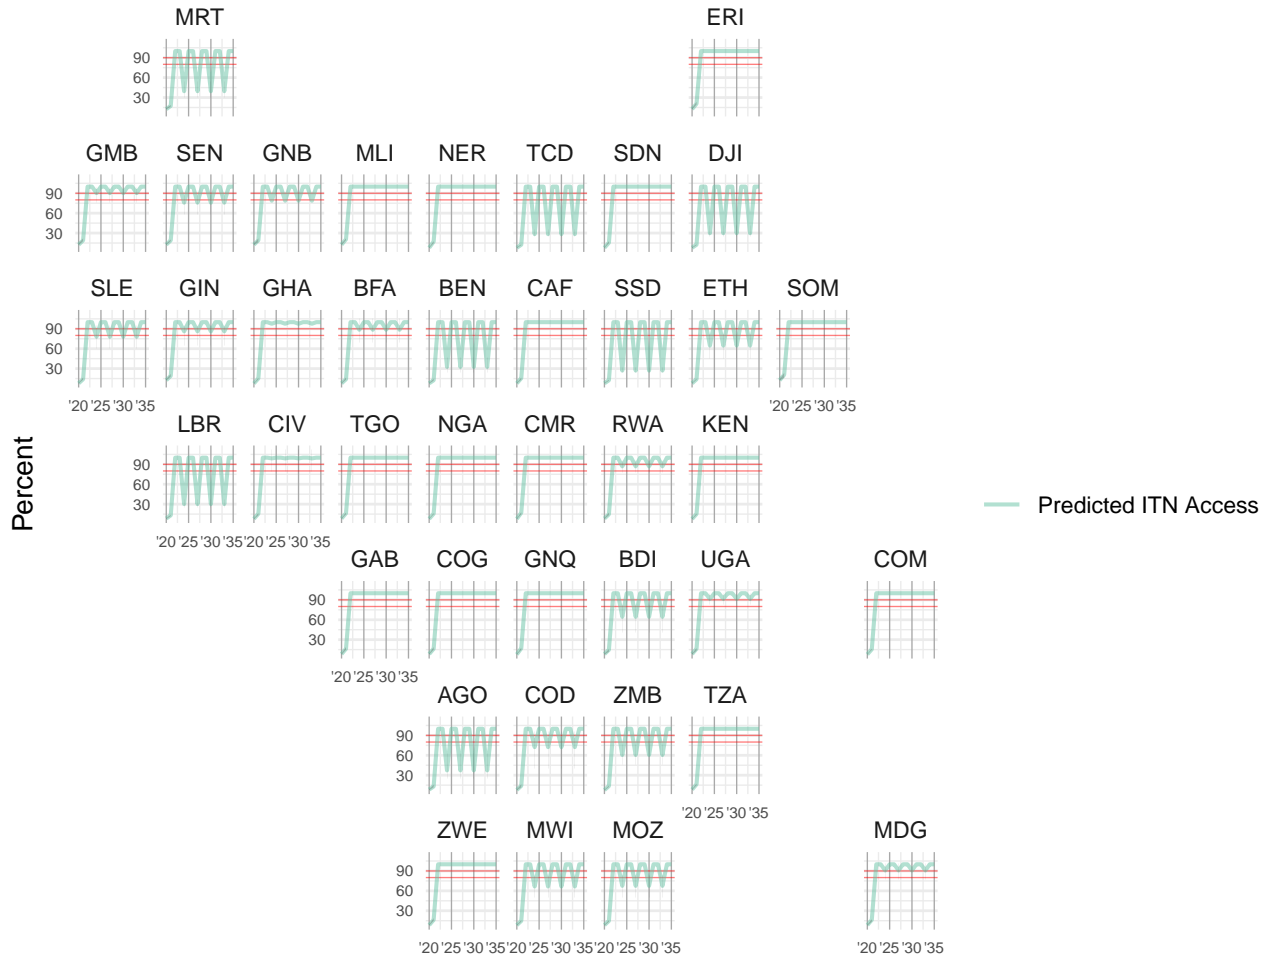

### 3-year mass campaigns with ANC/EPI, at population / 0.6

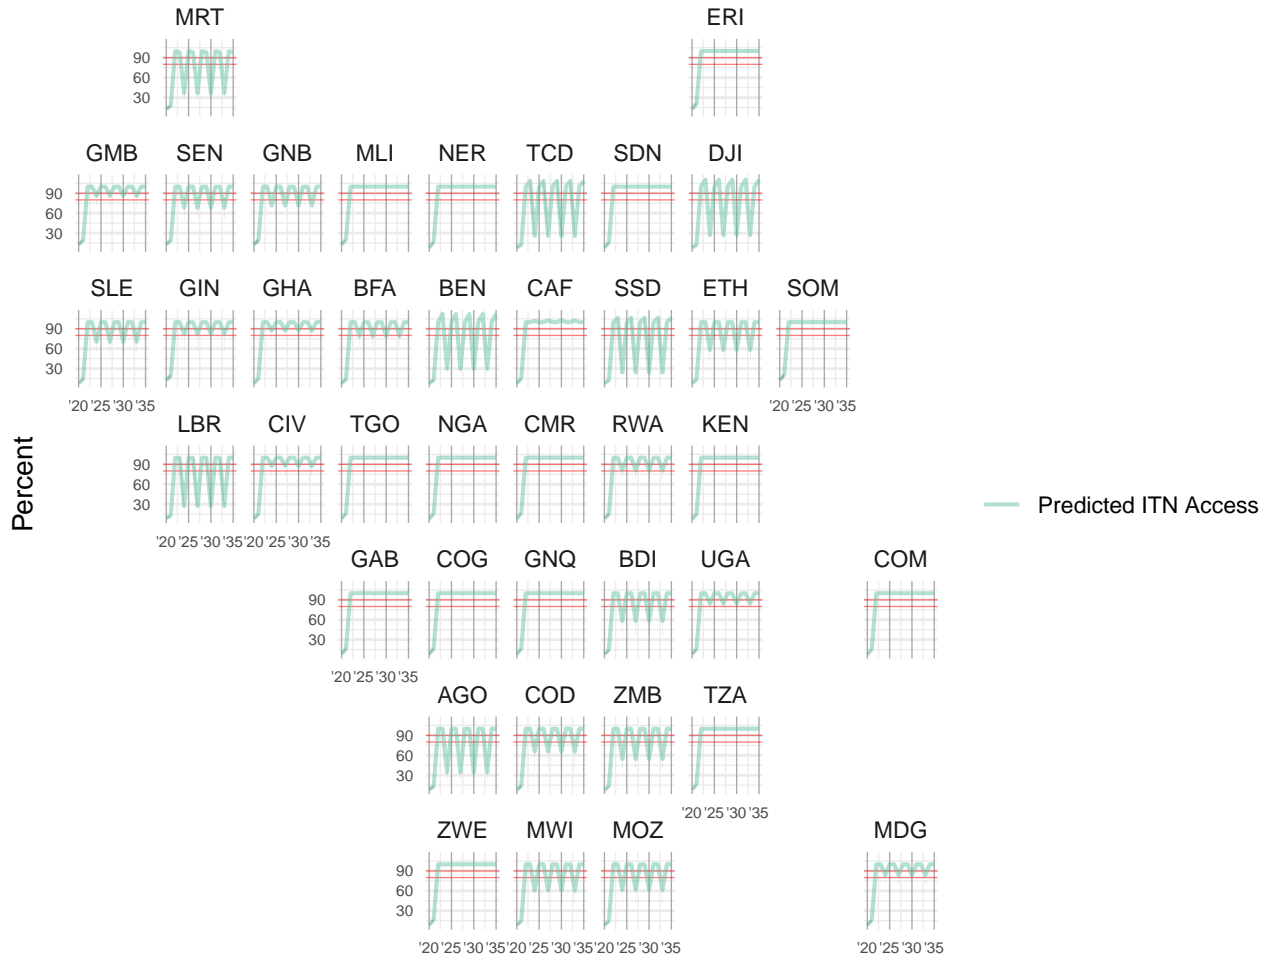

### 3-year mass campaigns with ANC/EPI, at population / 0.7

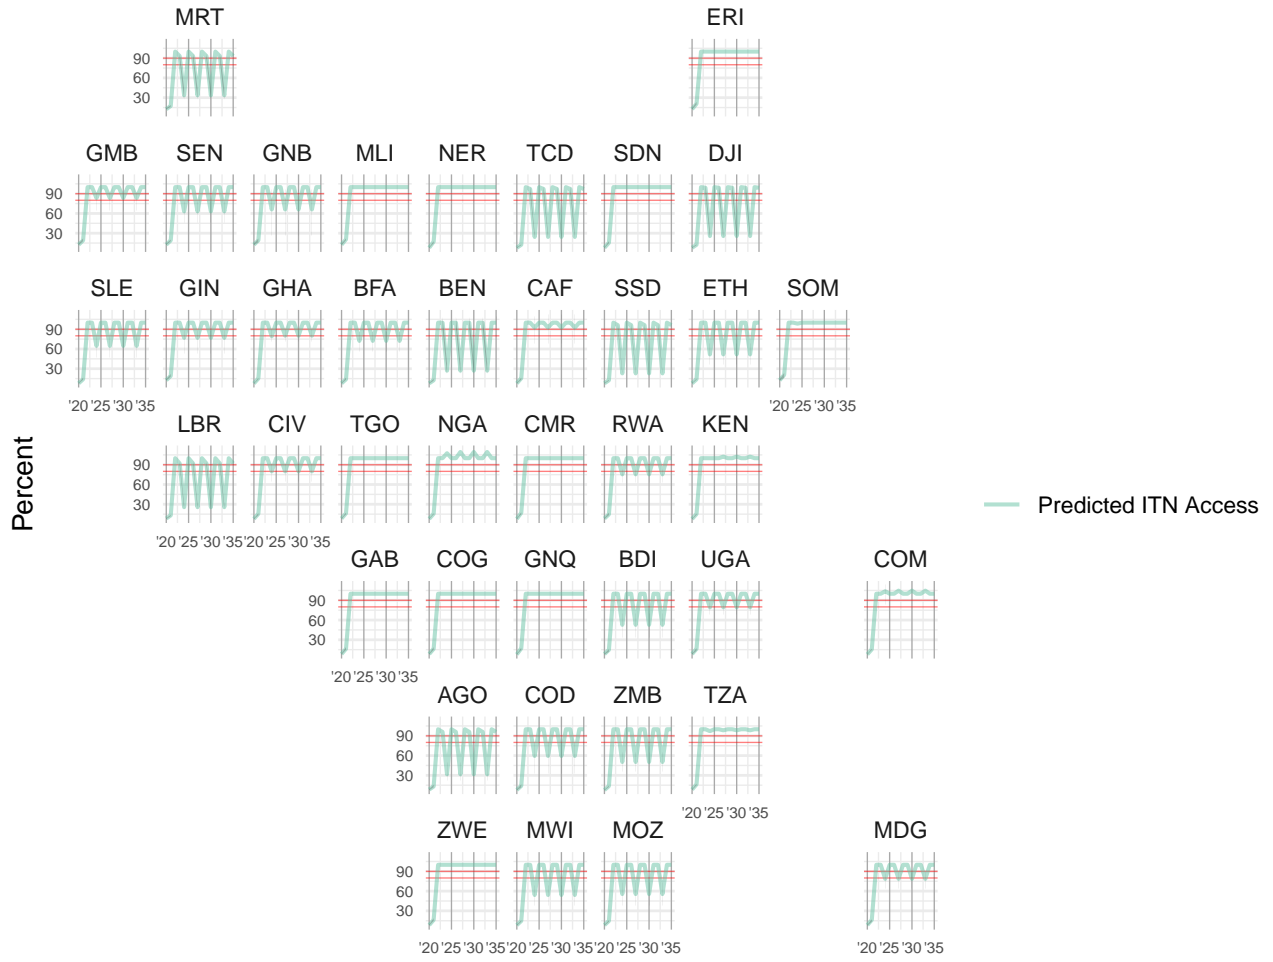

### 3-year mass campaigns with ANC/EPI, at population / 0.8

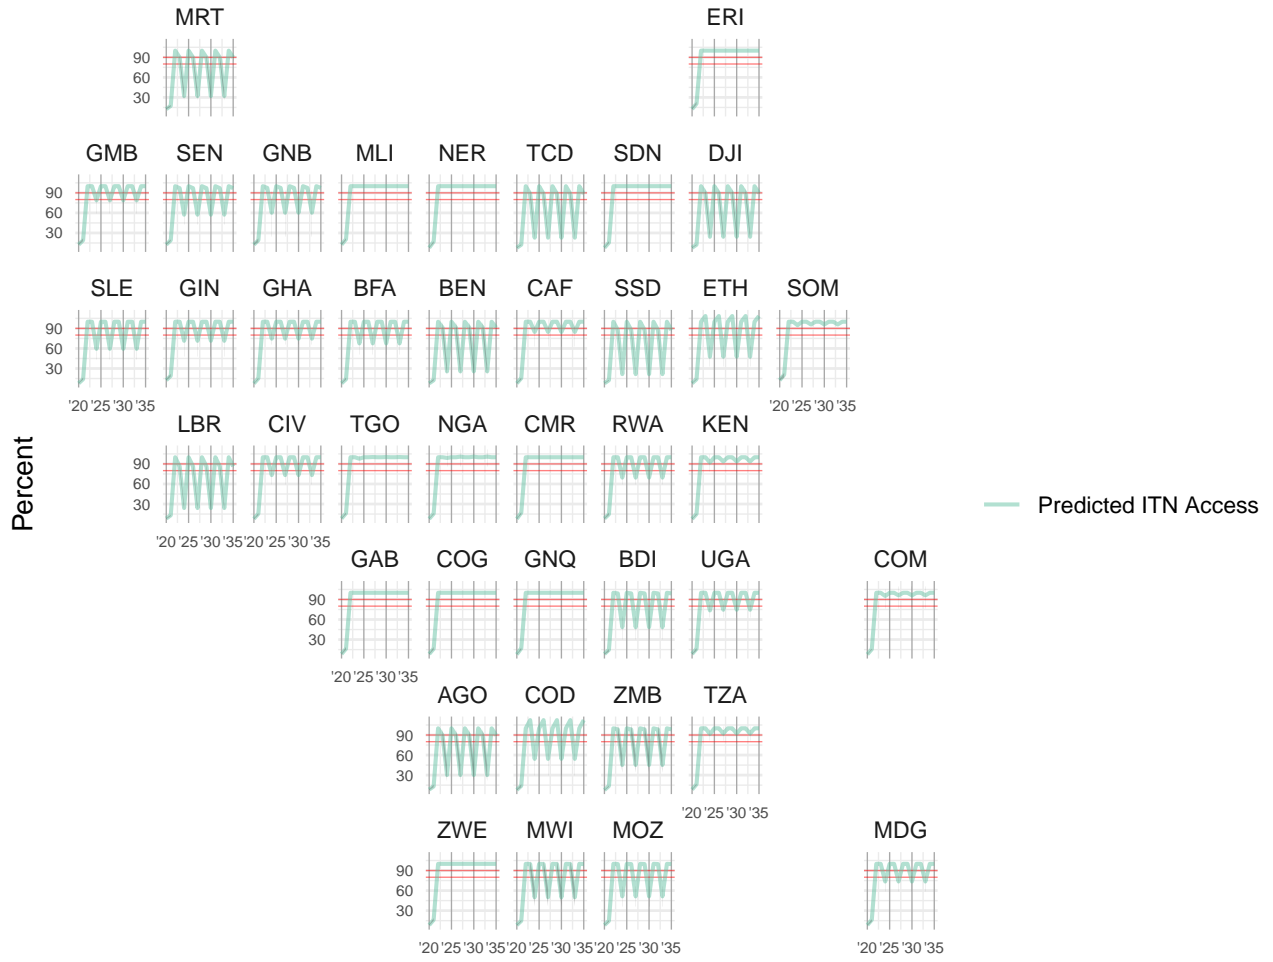



### 3-year mass campaigns with ANC/EPI, at population / 0.9

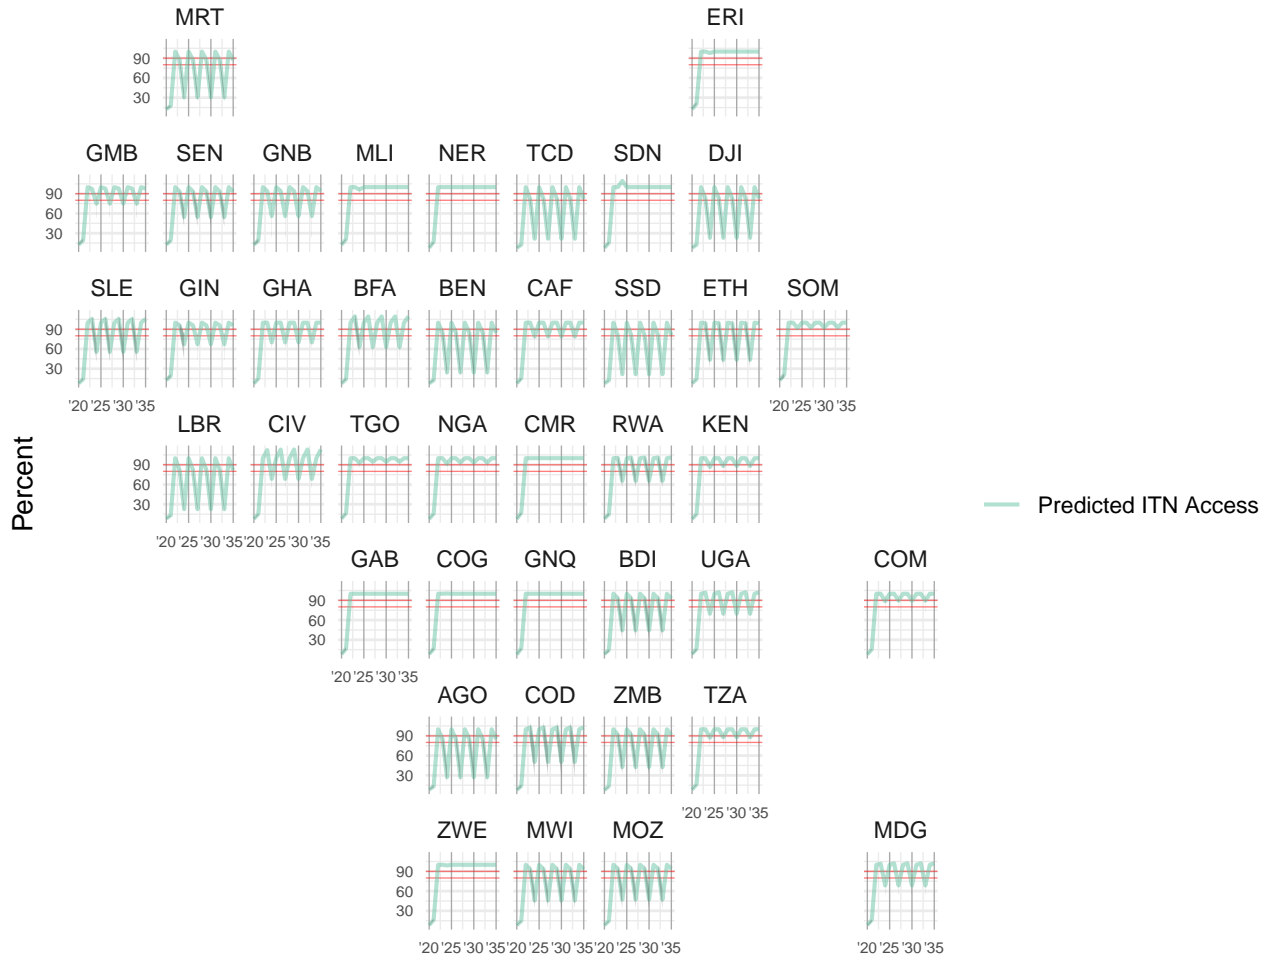

### 3-year mass campaigns with ANC/EPI, at population / 1

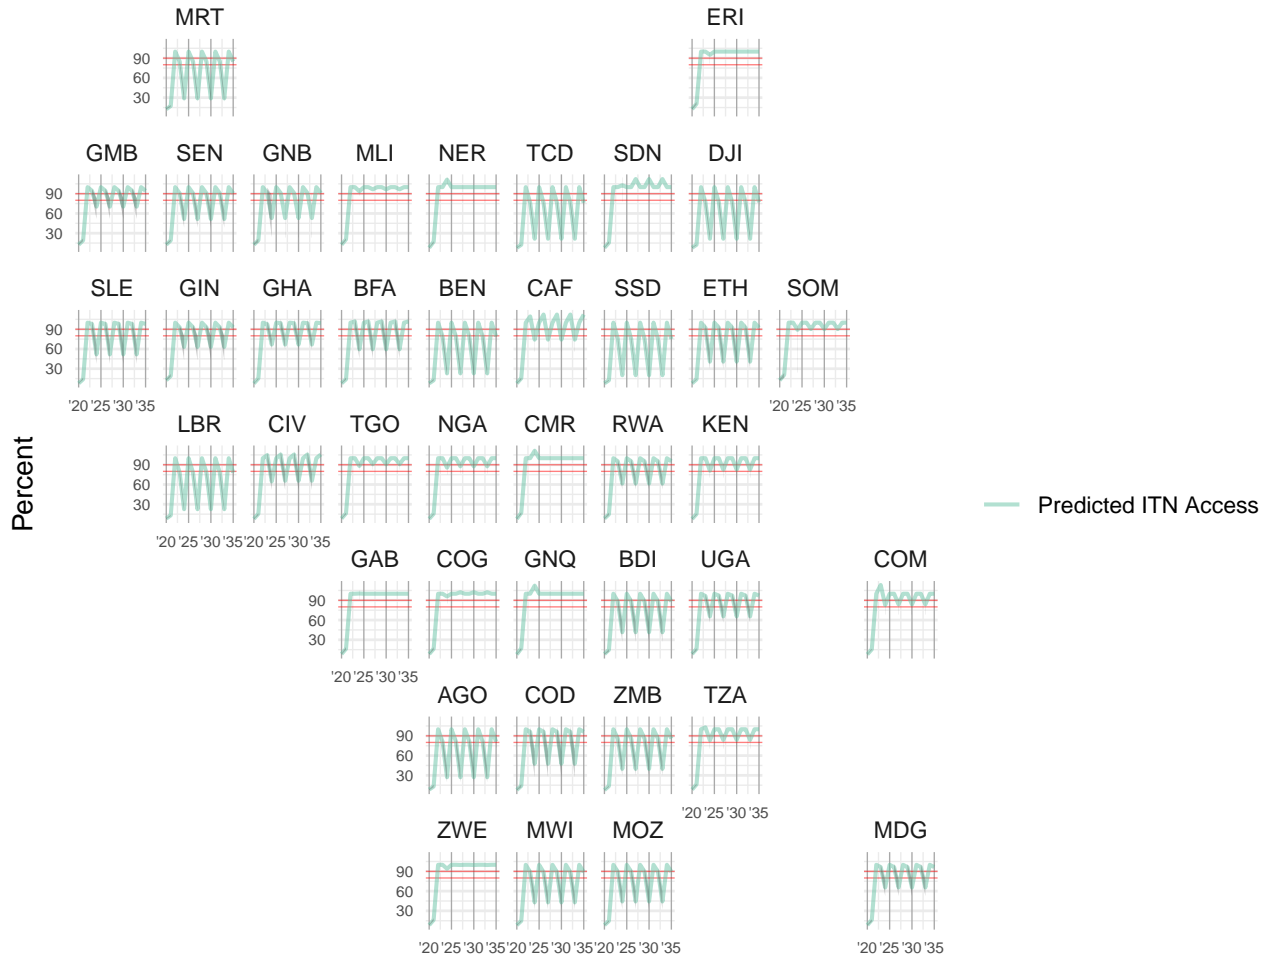

### 3-year mass campaigns with ANC/EPI, at population / 1.1

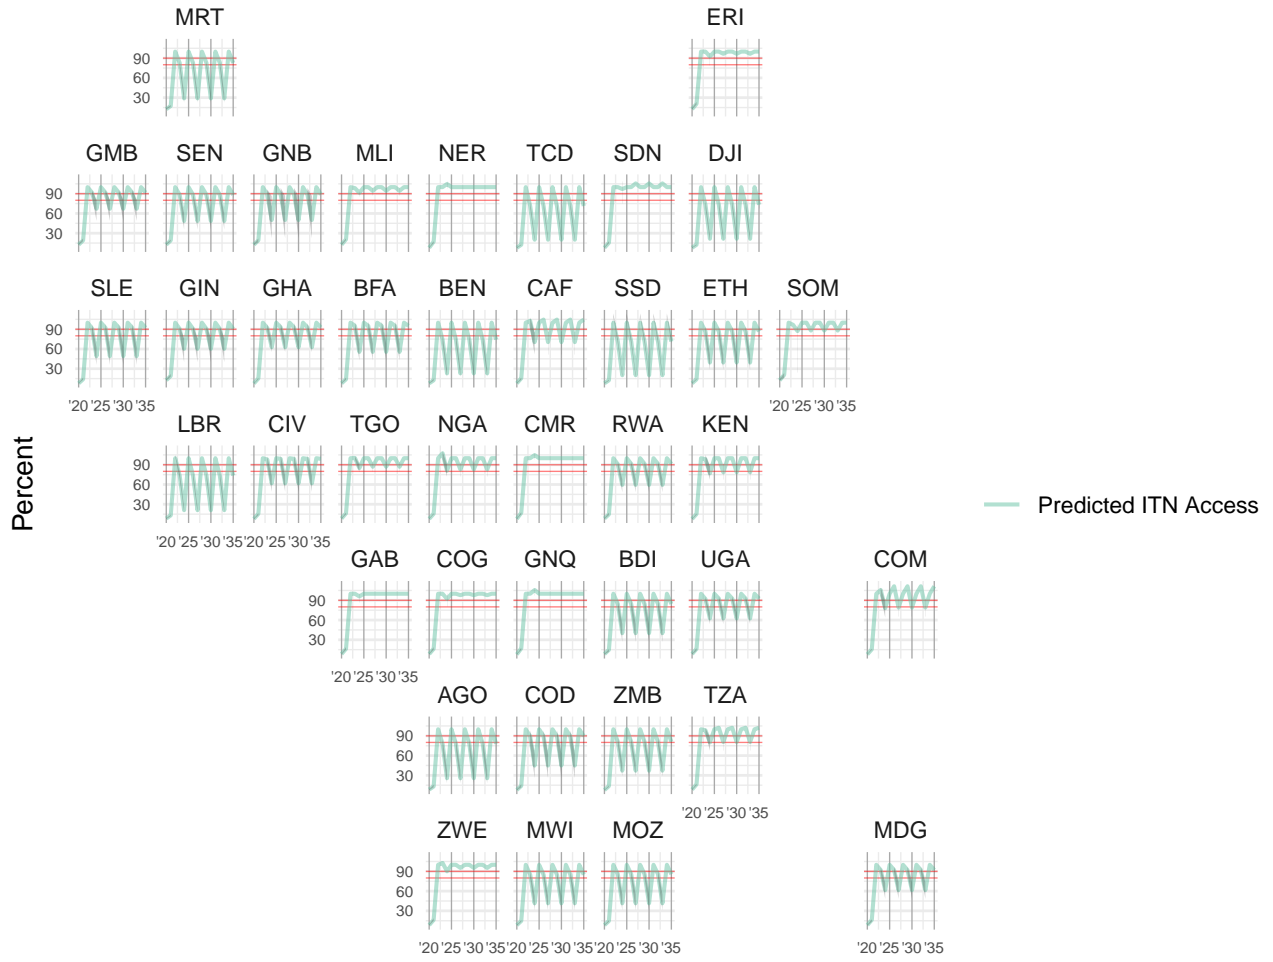

### 3-year mass campaigns with ANC/EPI, at population / 1.2

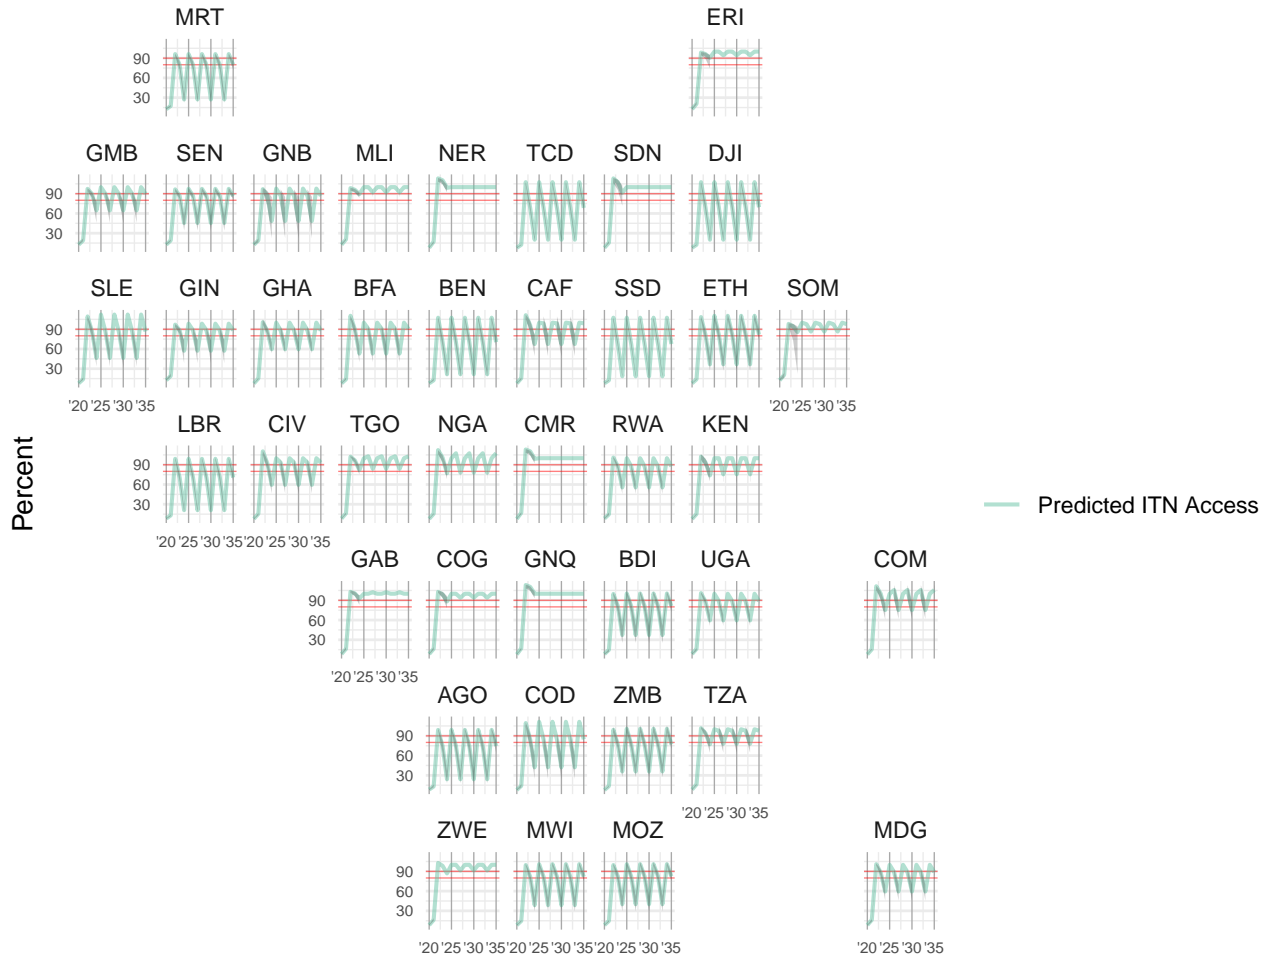

### 3-year mass campaigns with ANC/EPI, at population / 1.3

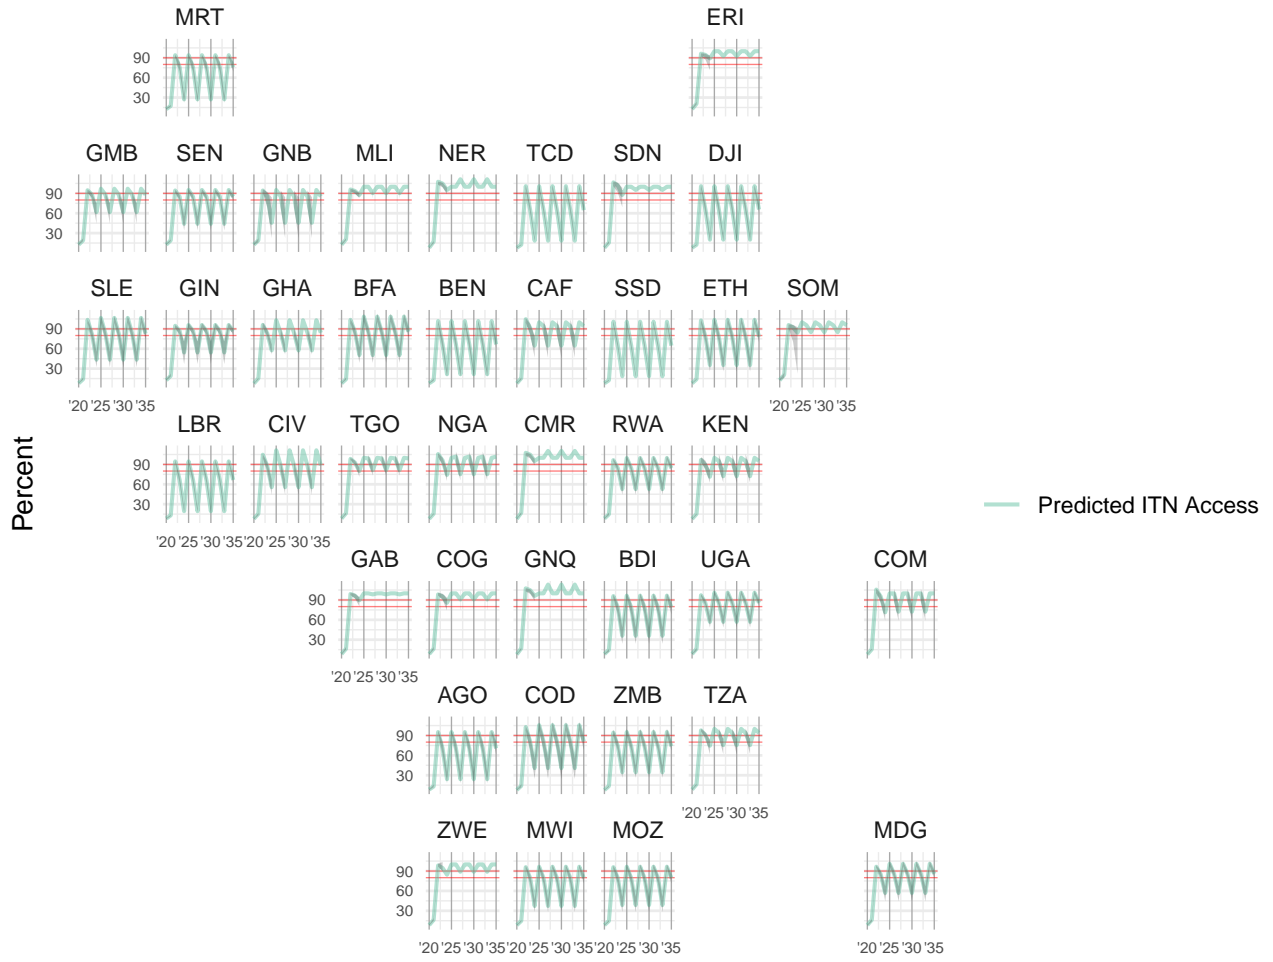

### 3-year mass campaigns with ANC/EPI, at population / 1.4

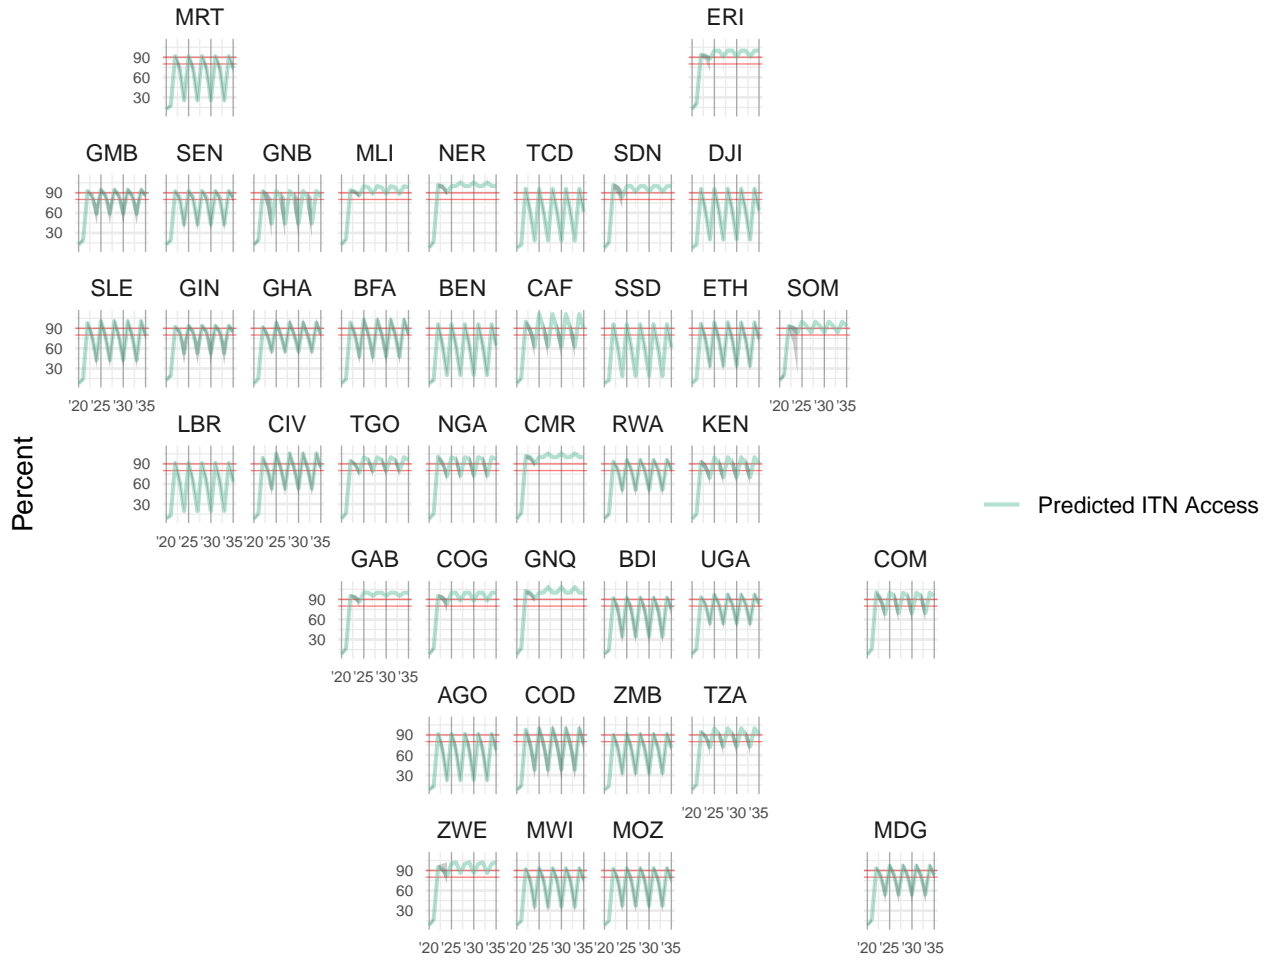

### 3-year mass campaigns with ANC/EPI, at population / 1.5

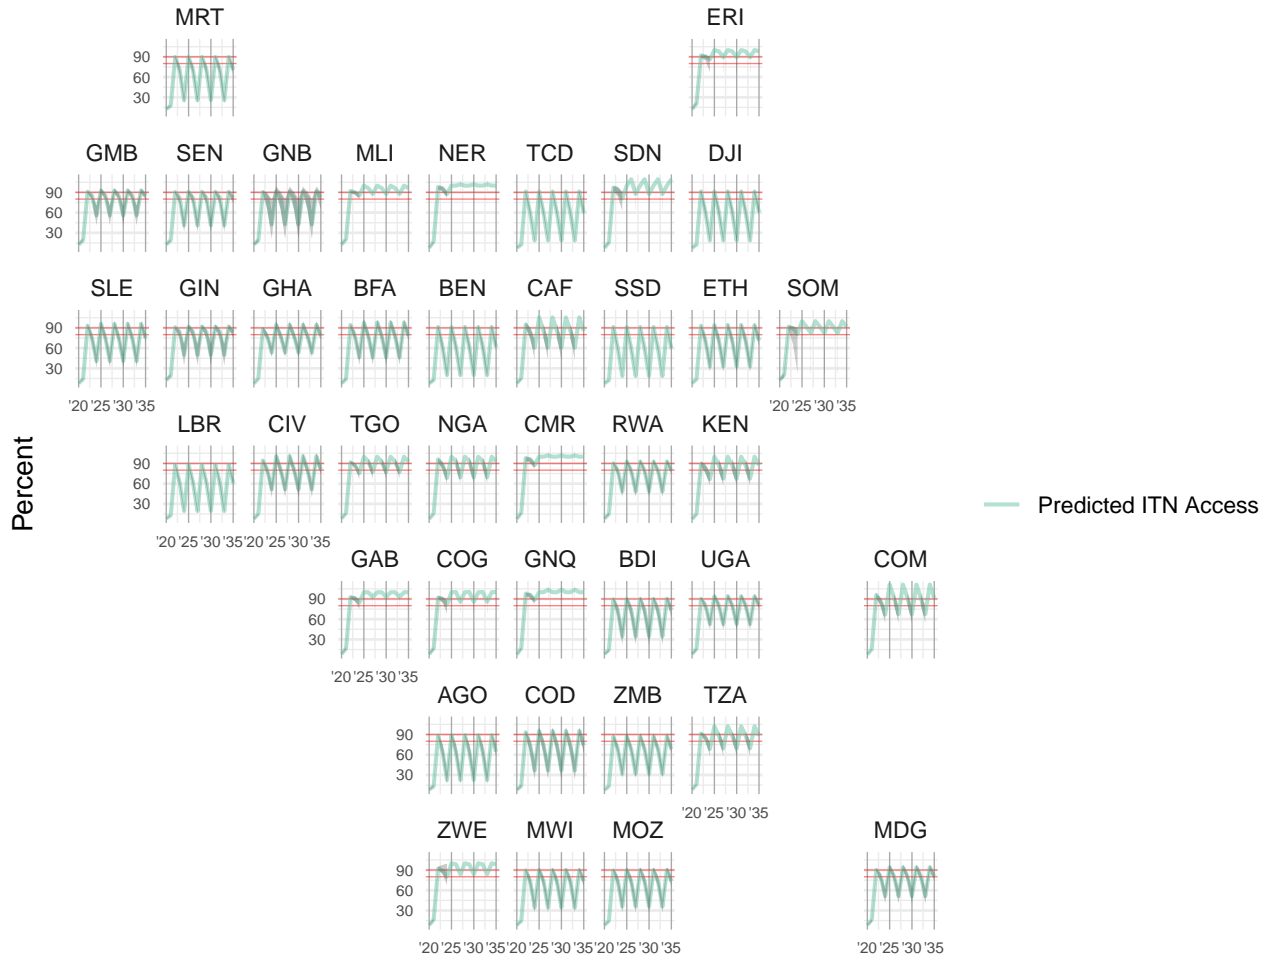

3-year mass campaigns with ANC/EPI, at population / 1.6

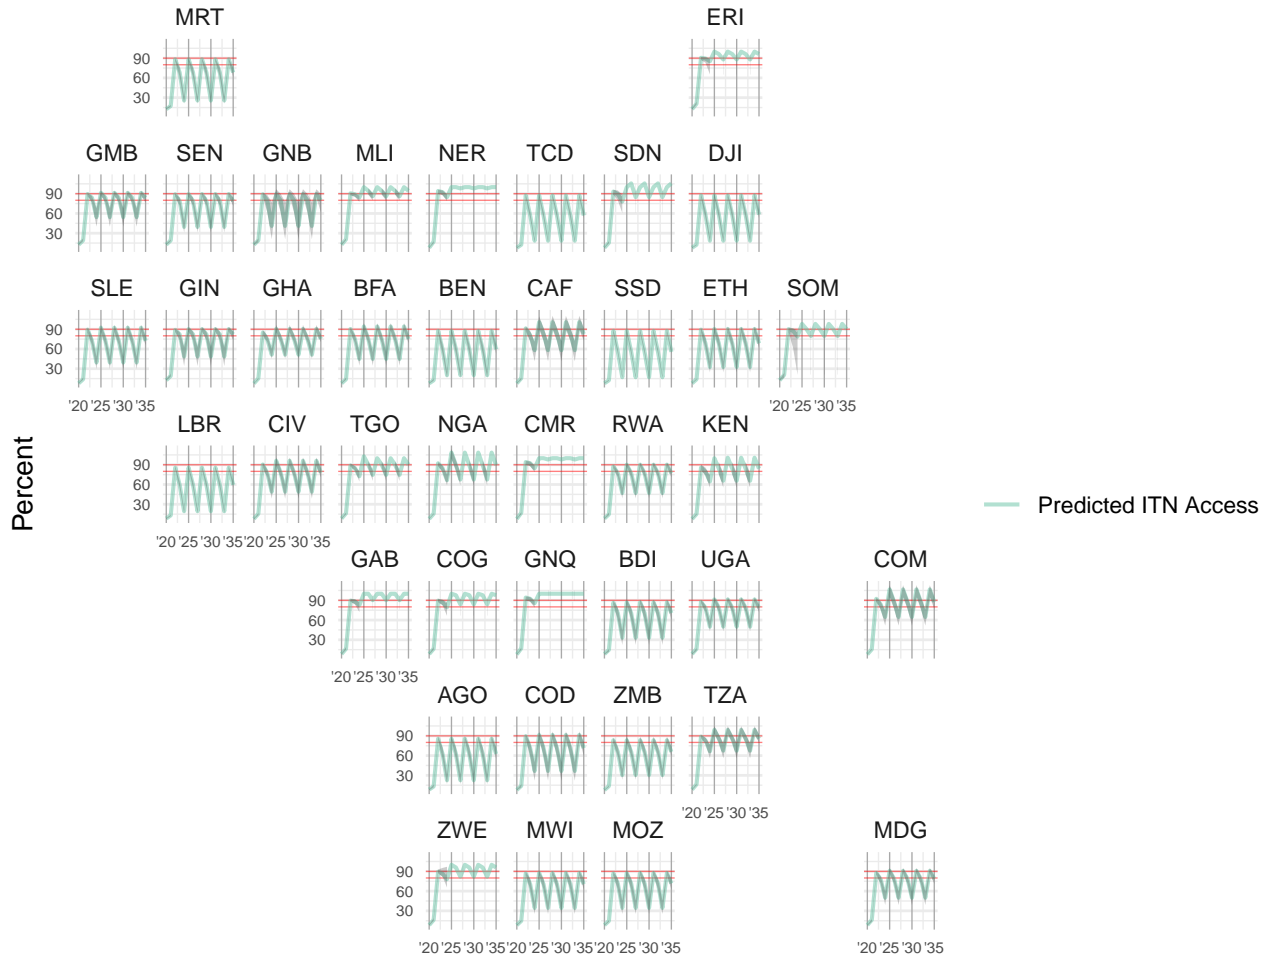



### 3-year mass campaigns with ANC/EPI, at population / 1.7

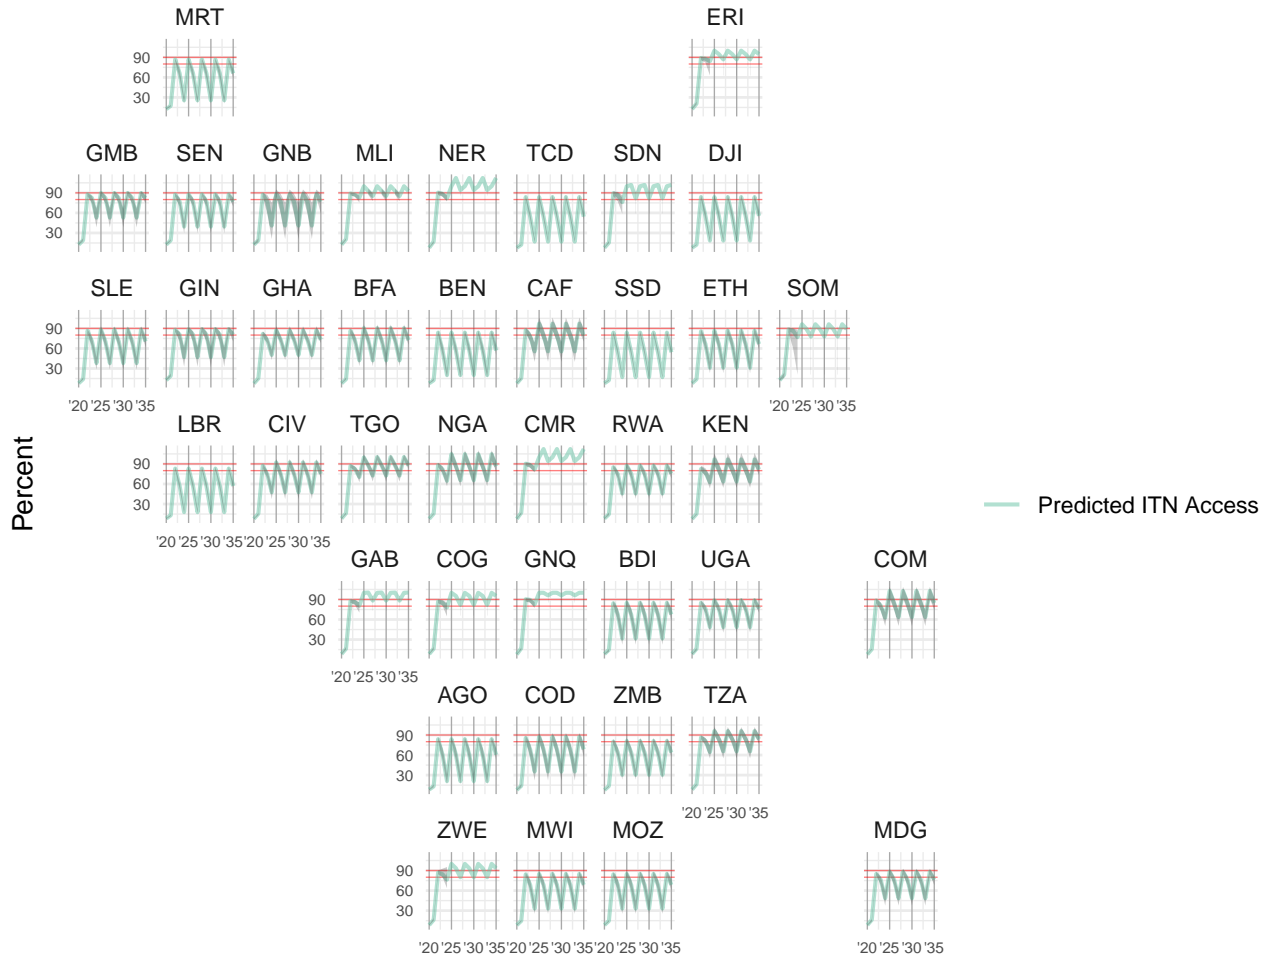

### 3-year mass campaigns with ANC/EPI, at population / 1.8

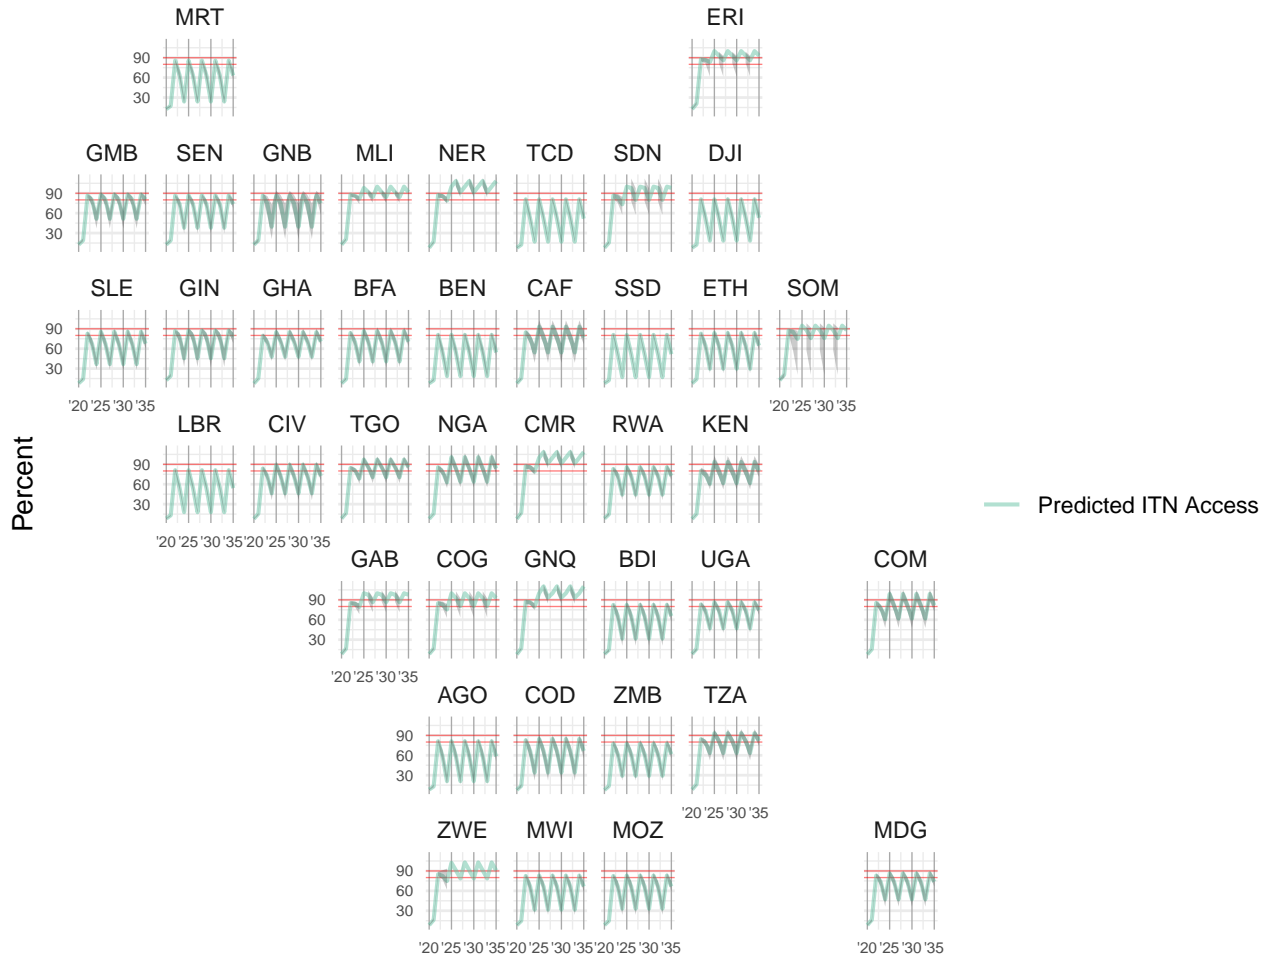

### 3-year mass campaigns with ANC/EPI, at population / 1.9

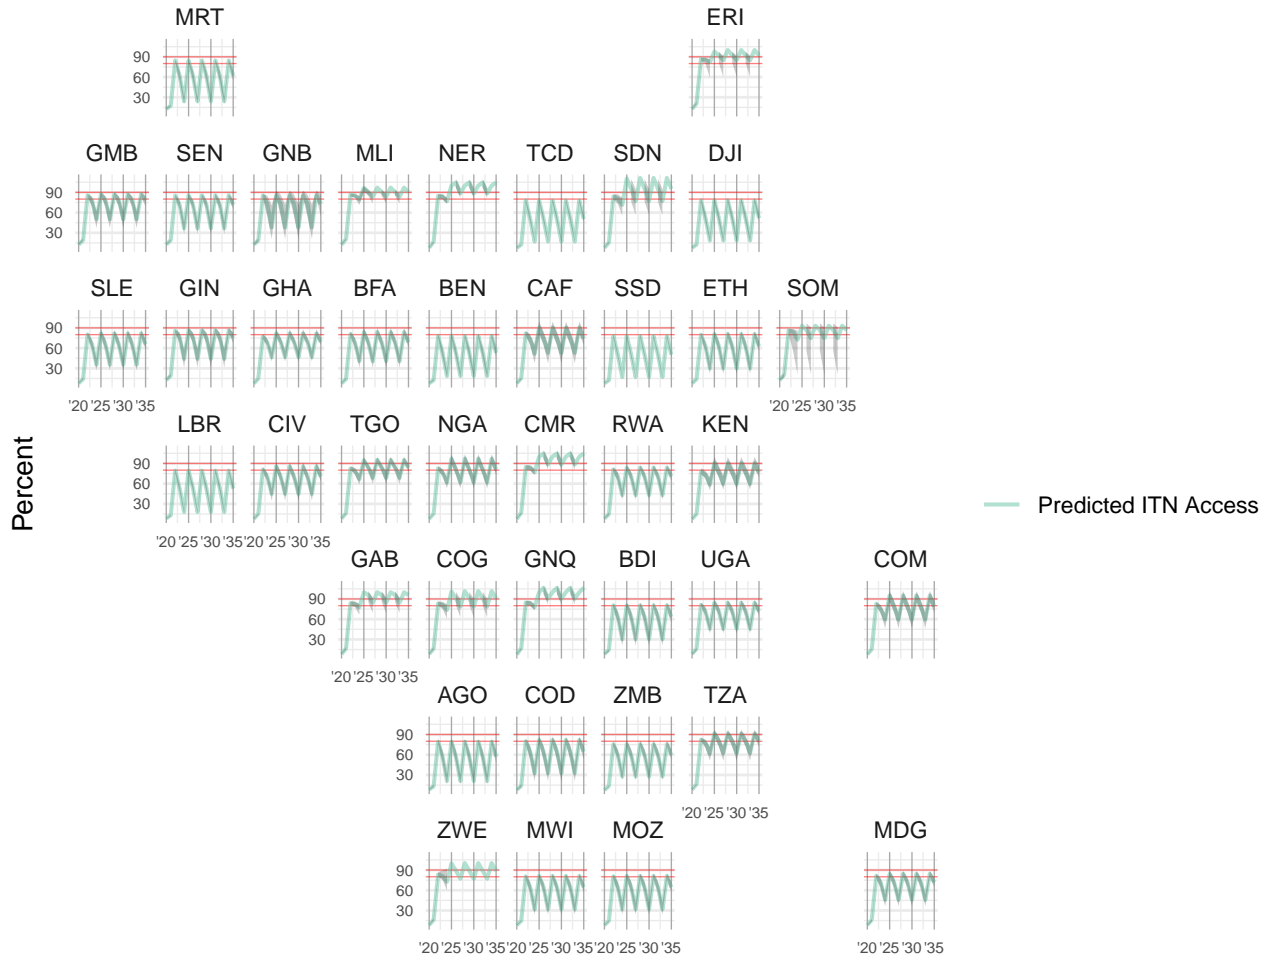

### 3-year mass campaigns with ANC/EPI, at population / 2

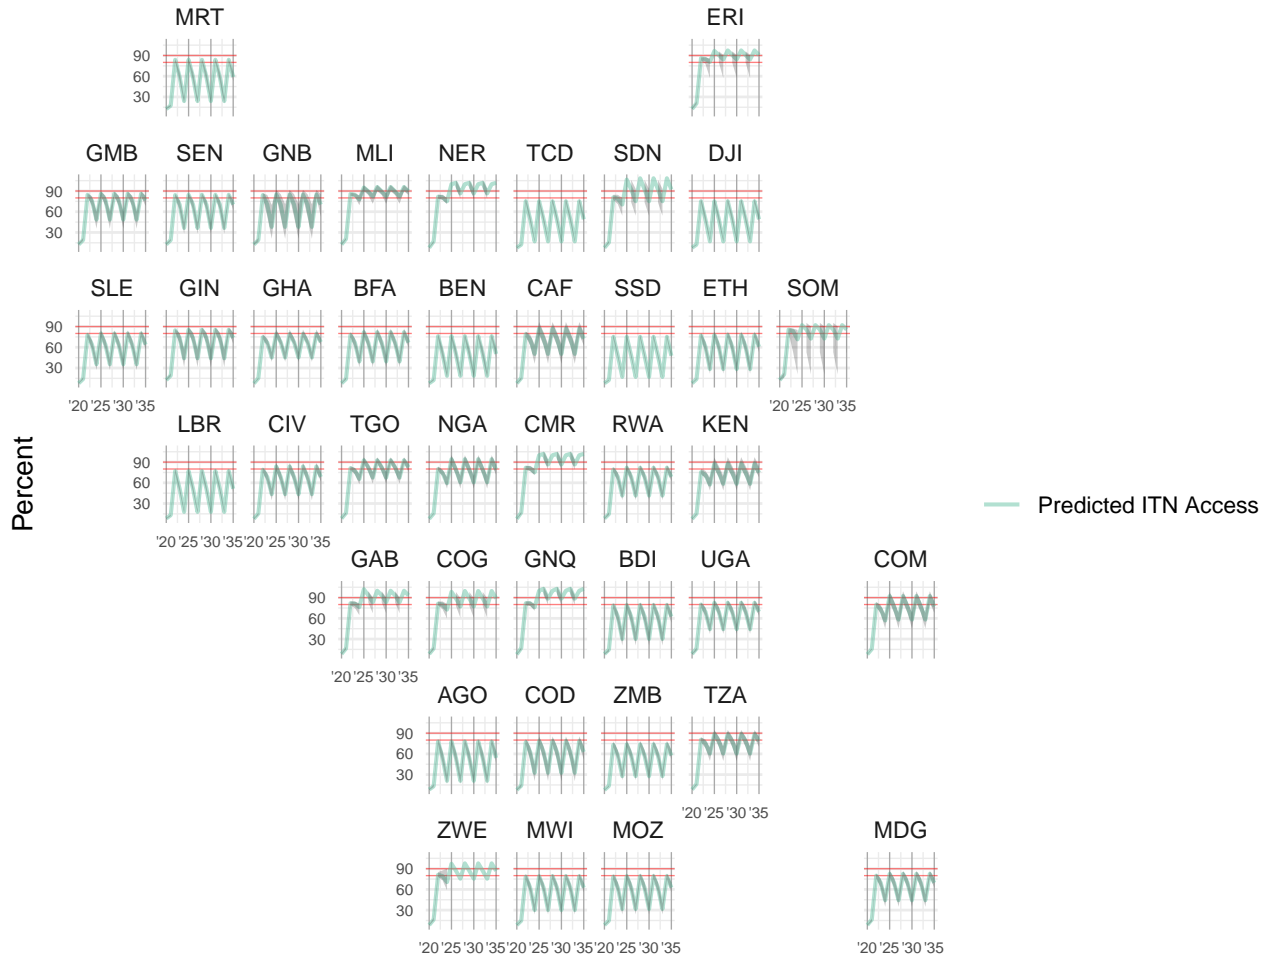

## 5 Scenario 5 - Two-year mass campaigns with ANC/EPI distribution at 6%, varying campaign quantifier

2-year mass campaigns with ANC/EPI,  
at population / 0.5

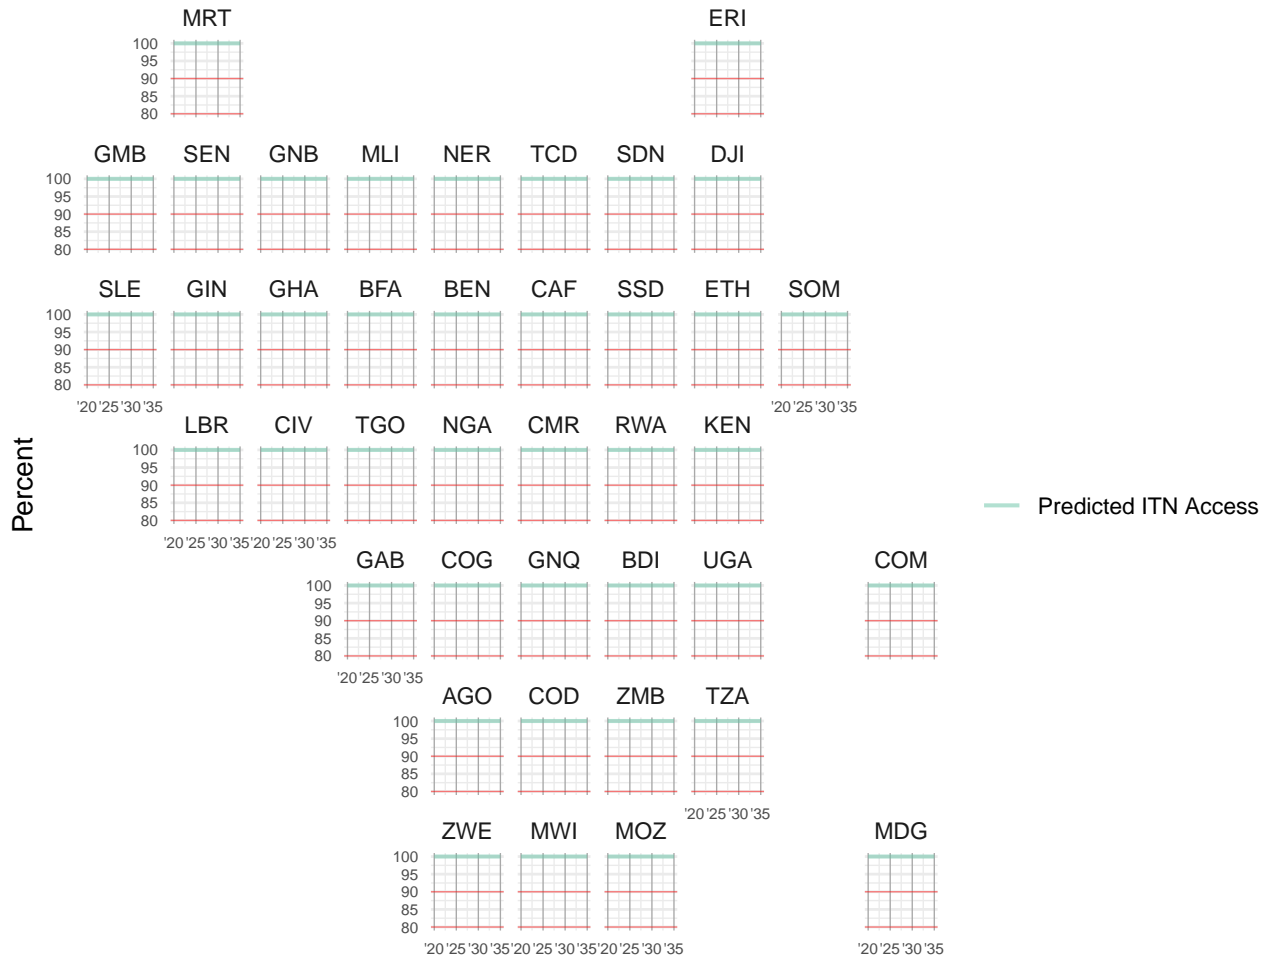

2-year mass campaigns with ANC/EPI,  
at population / 0.6

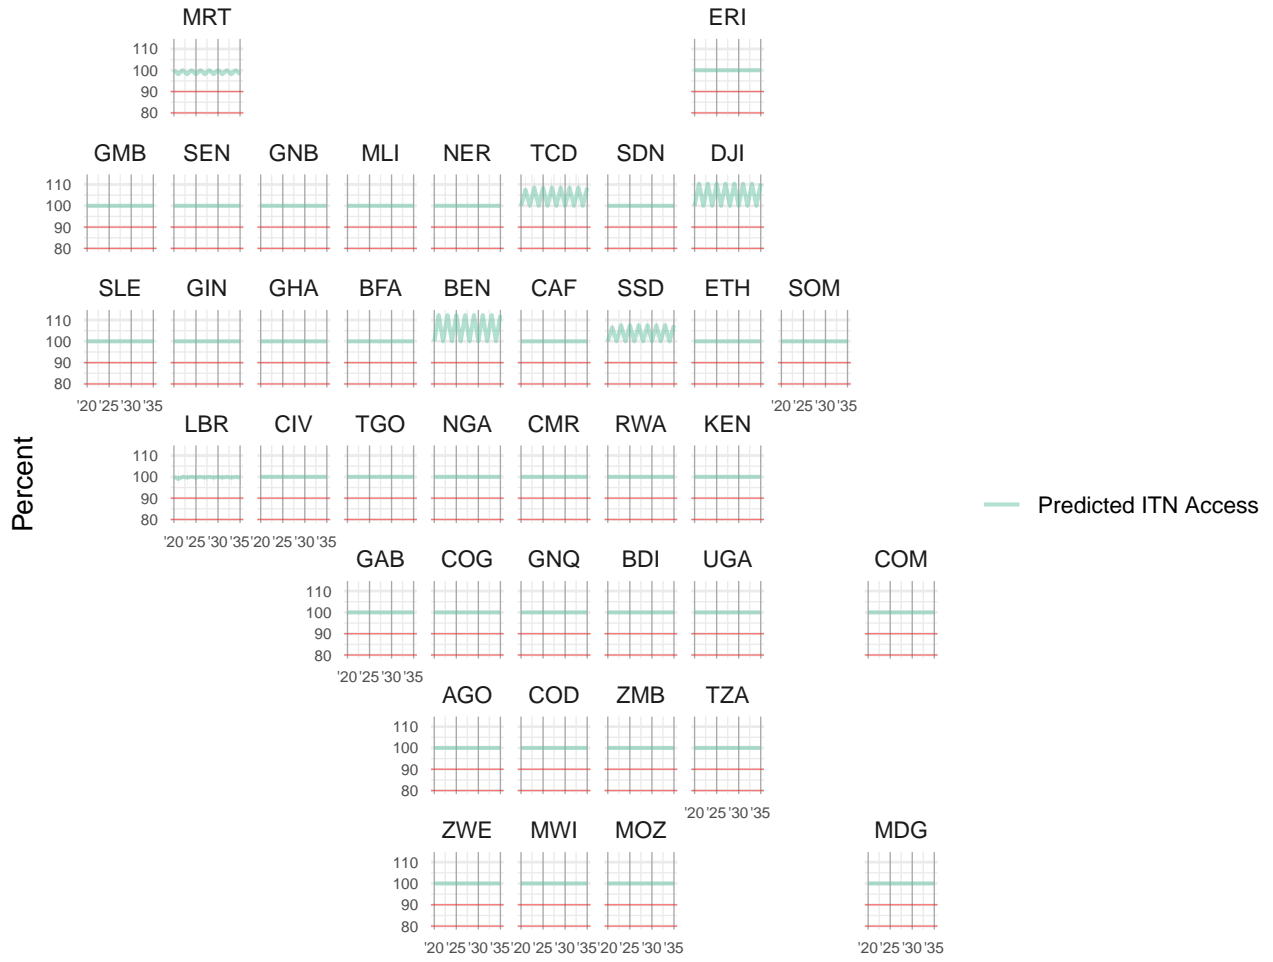

## 2-year mass campaigns with ANC/EPI, at population / 0.7

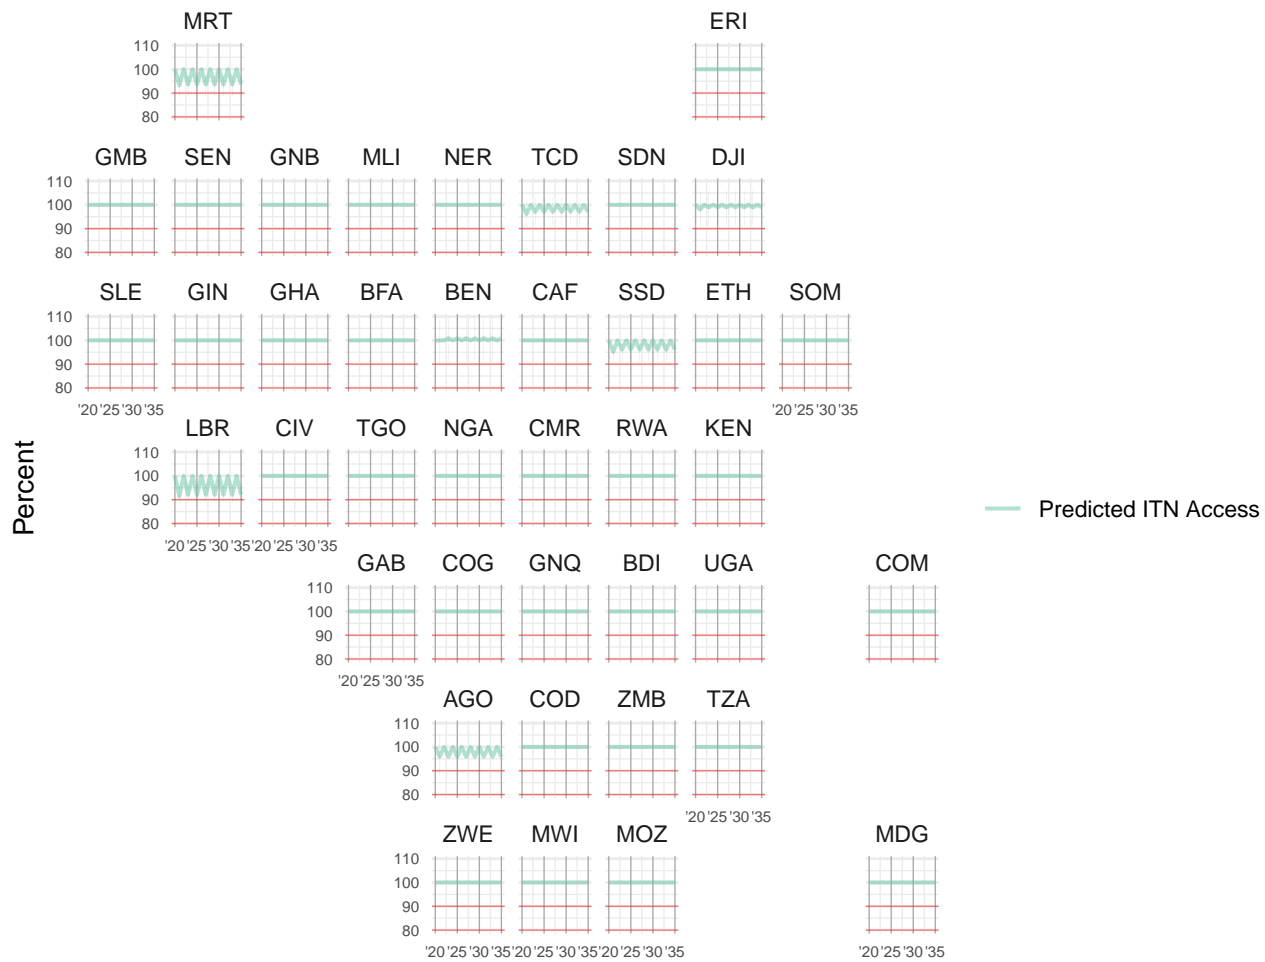

2-year mass campaigns with ANC/EPI,  
at population / 0.8

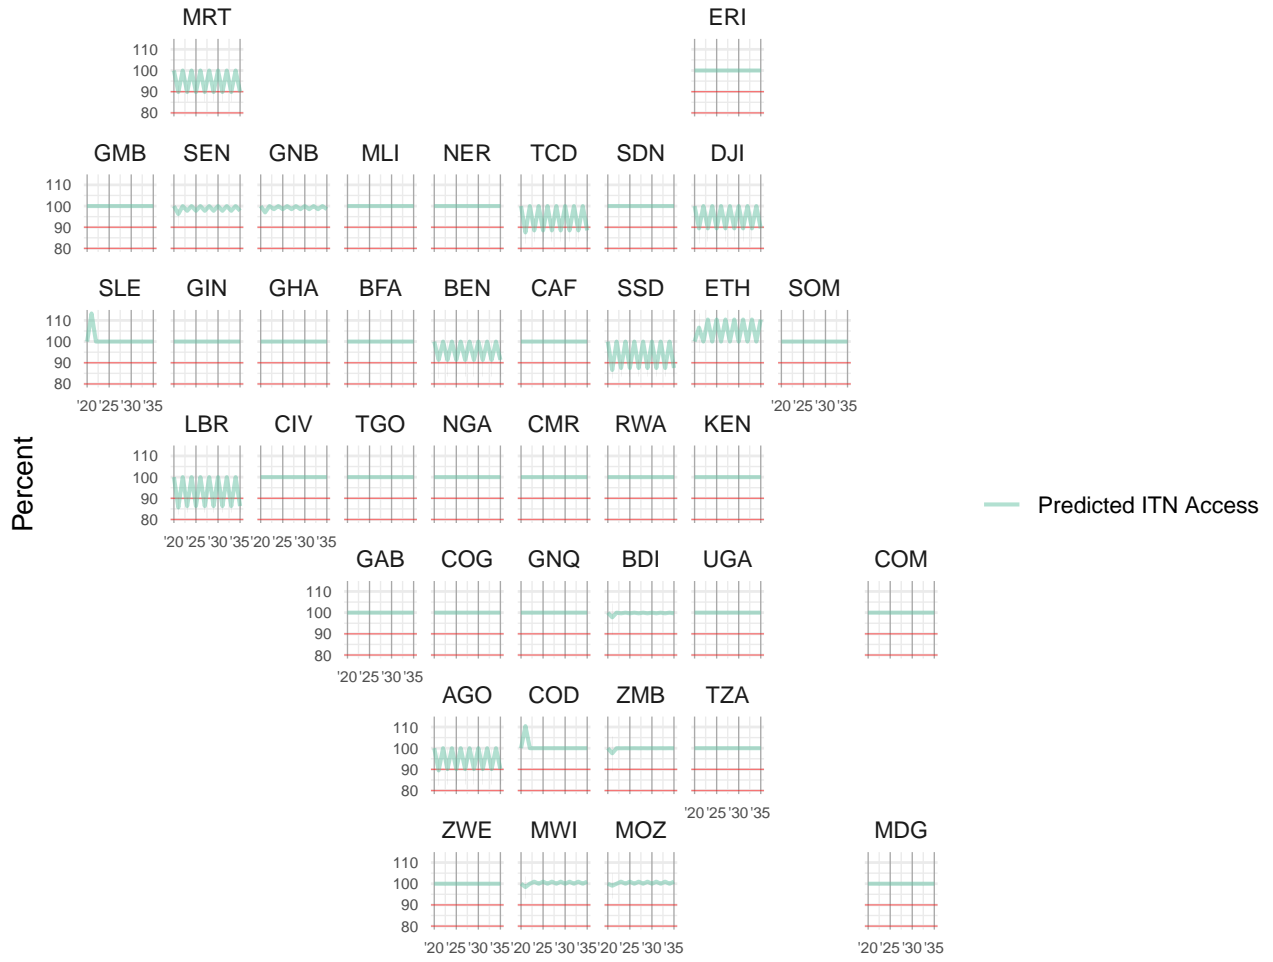



2-year mass campaigns with ANC/EPI,  
at population / 0.9

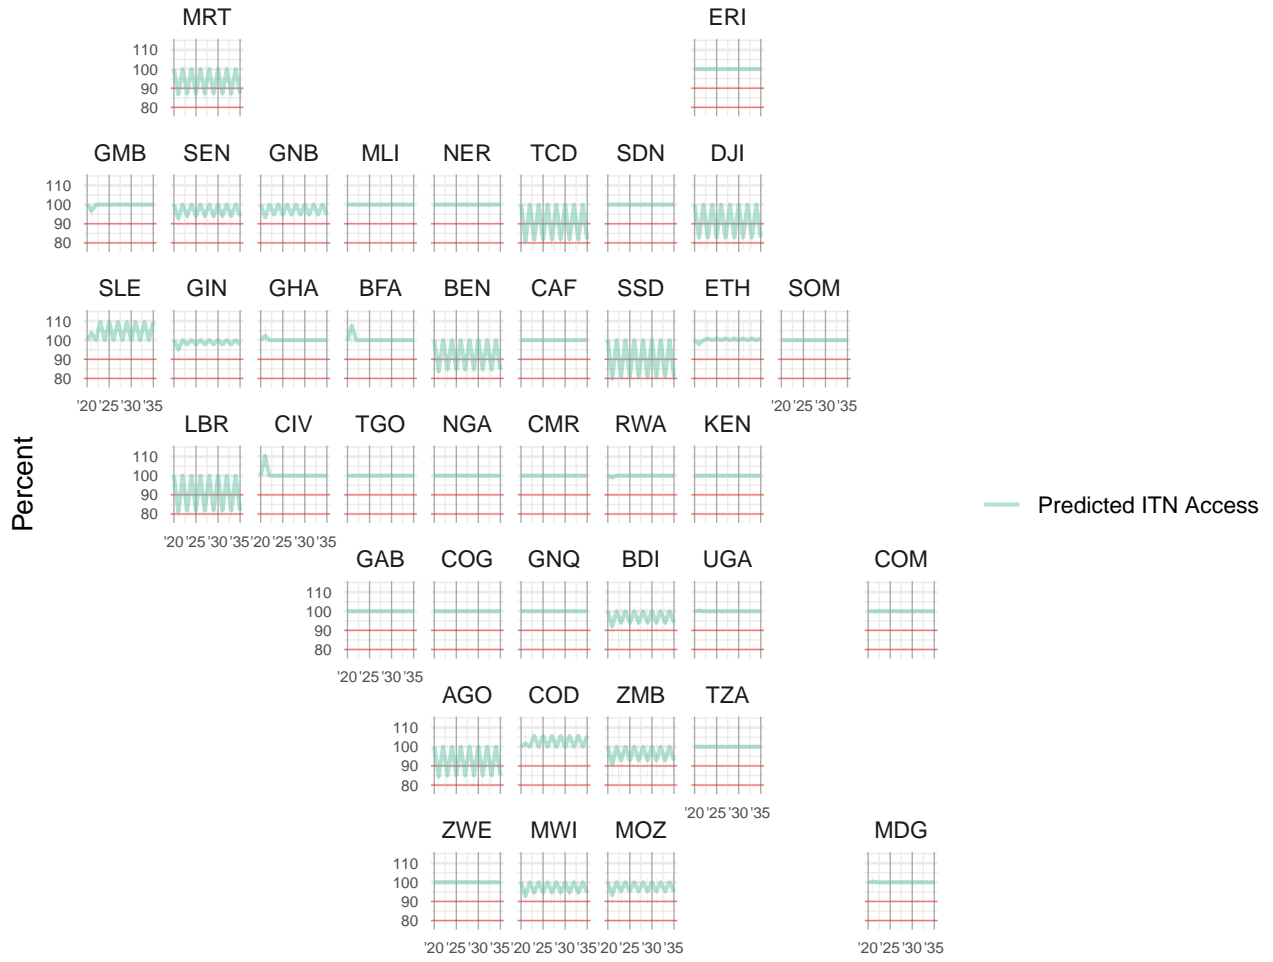

## 2-year mass campaigns with ANC/EPI, at population / 1

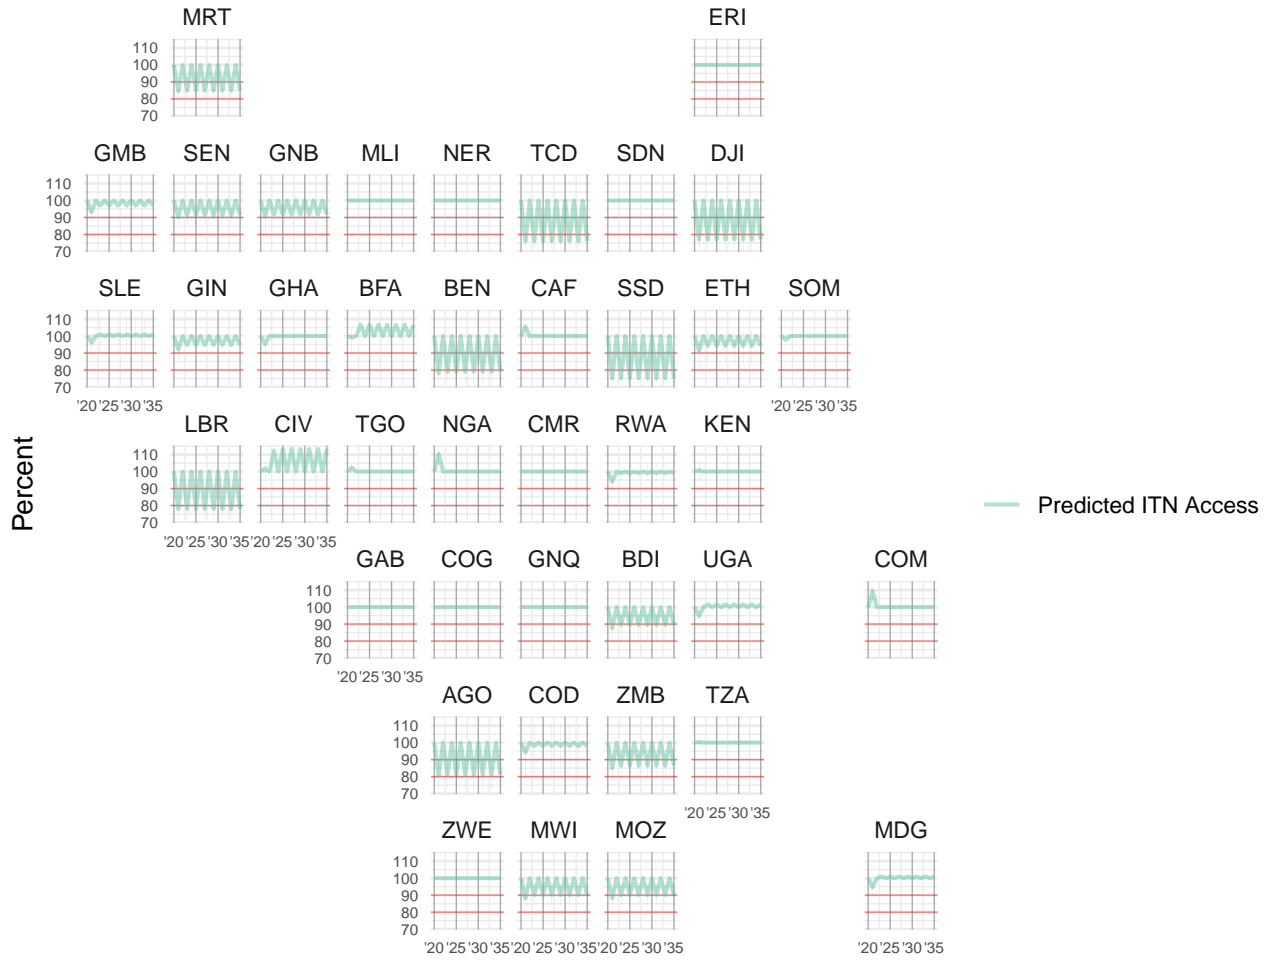

2-year mass campaigns with ANC/EPI,  
at population / 1.1

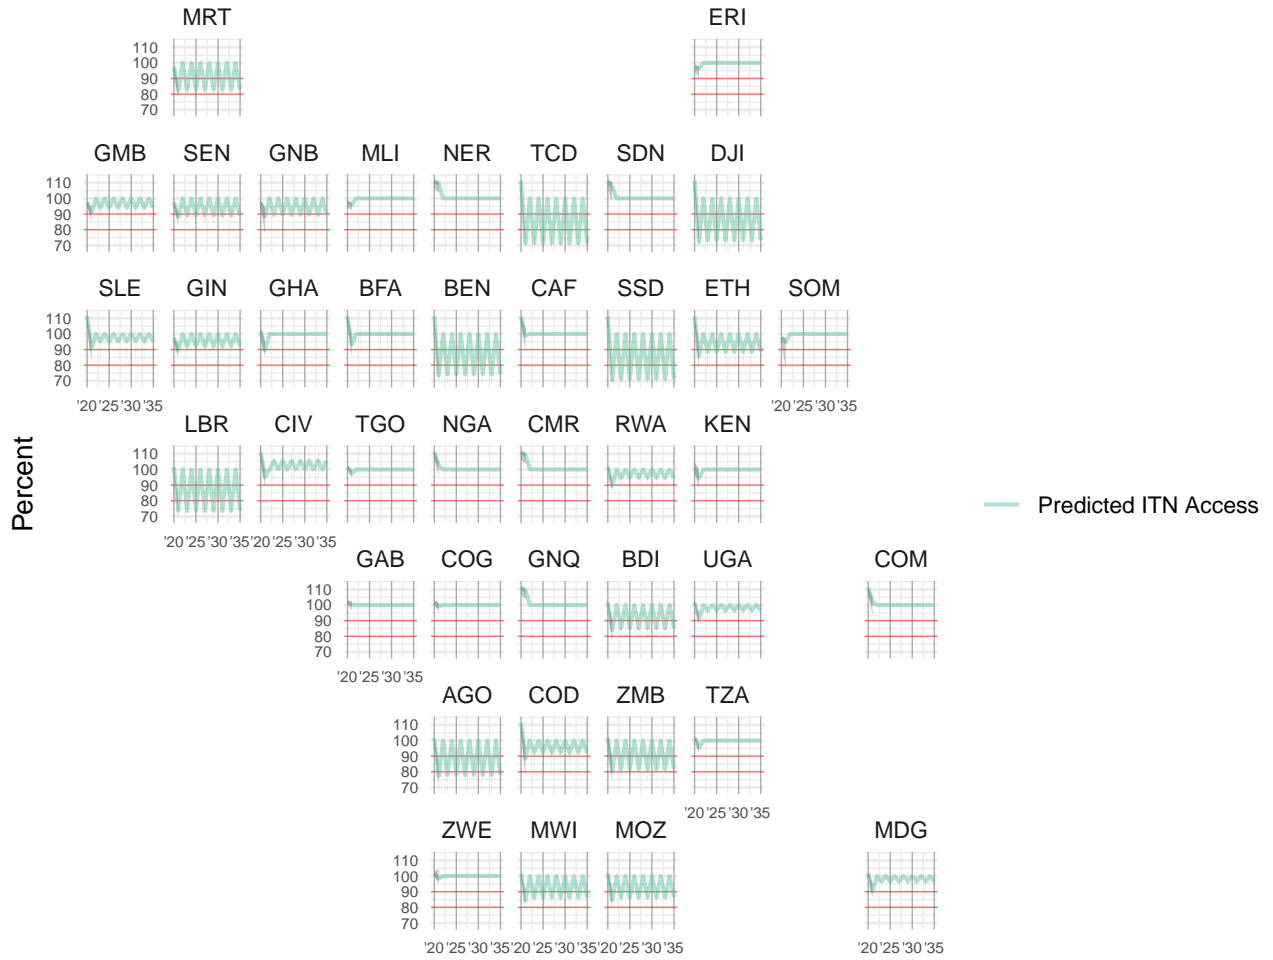

2-year mass campaigns with ANC/EPI,  
at population / 1.2

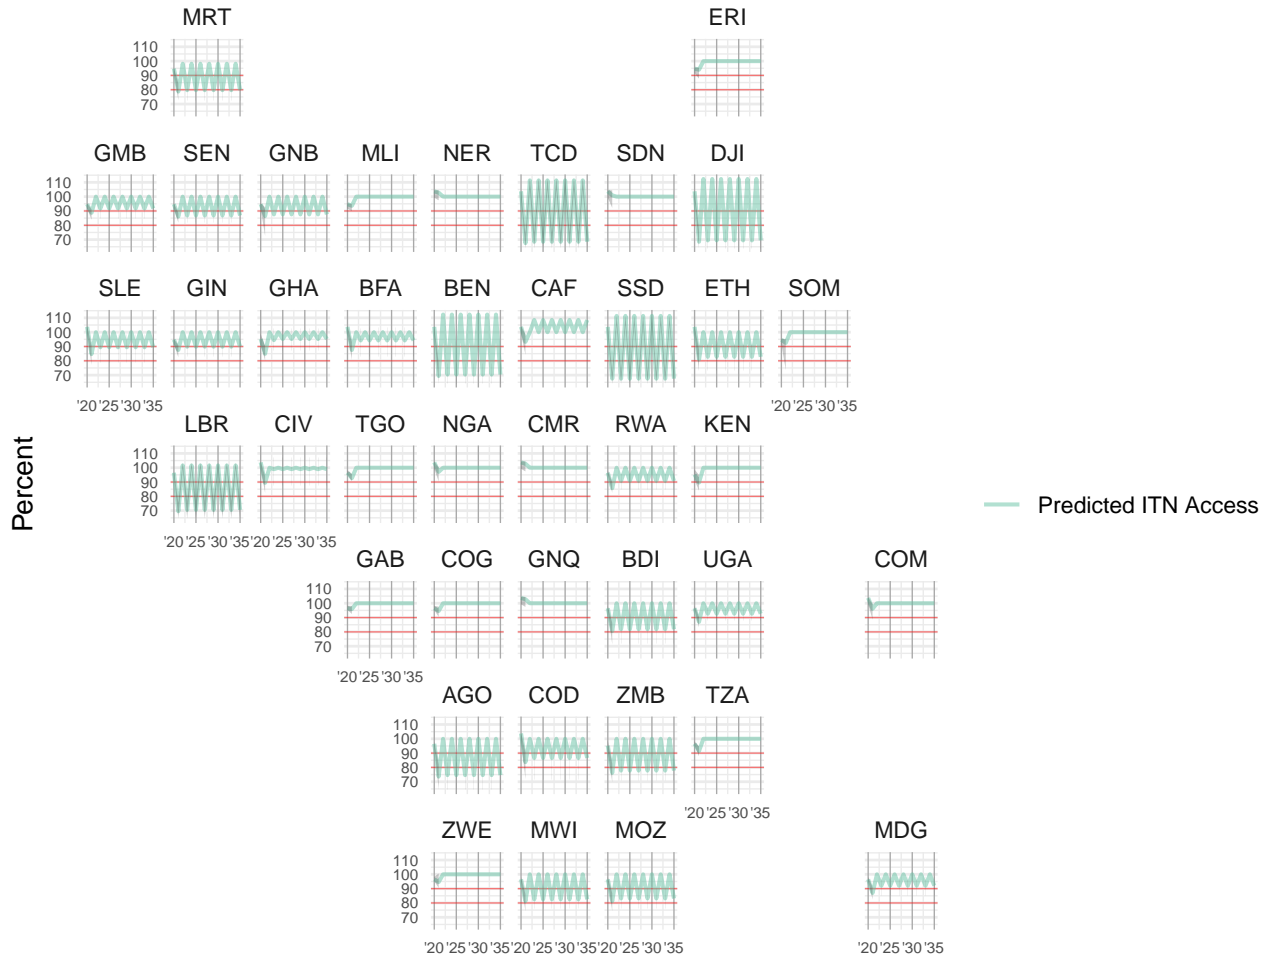

2-year mass campaigns with ANC/EPI,  
at population / 1.3

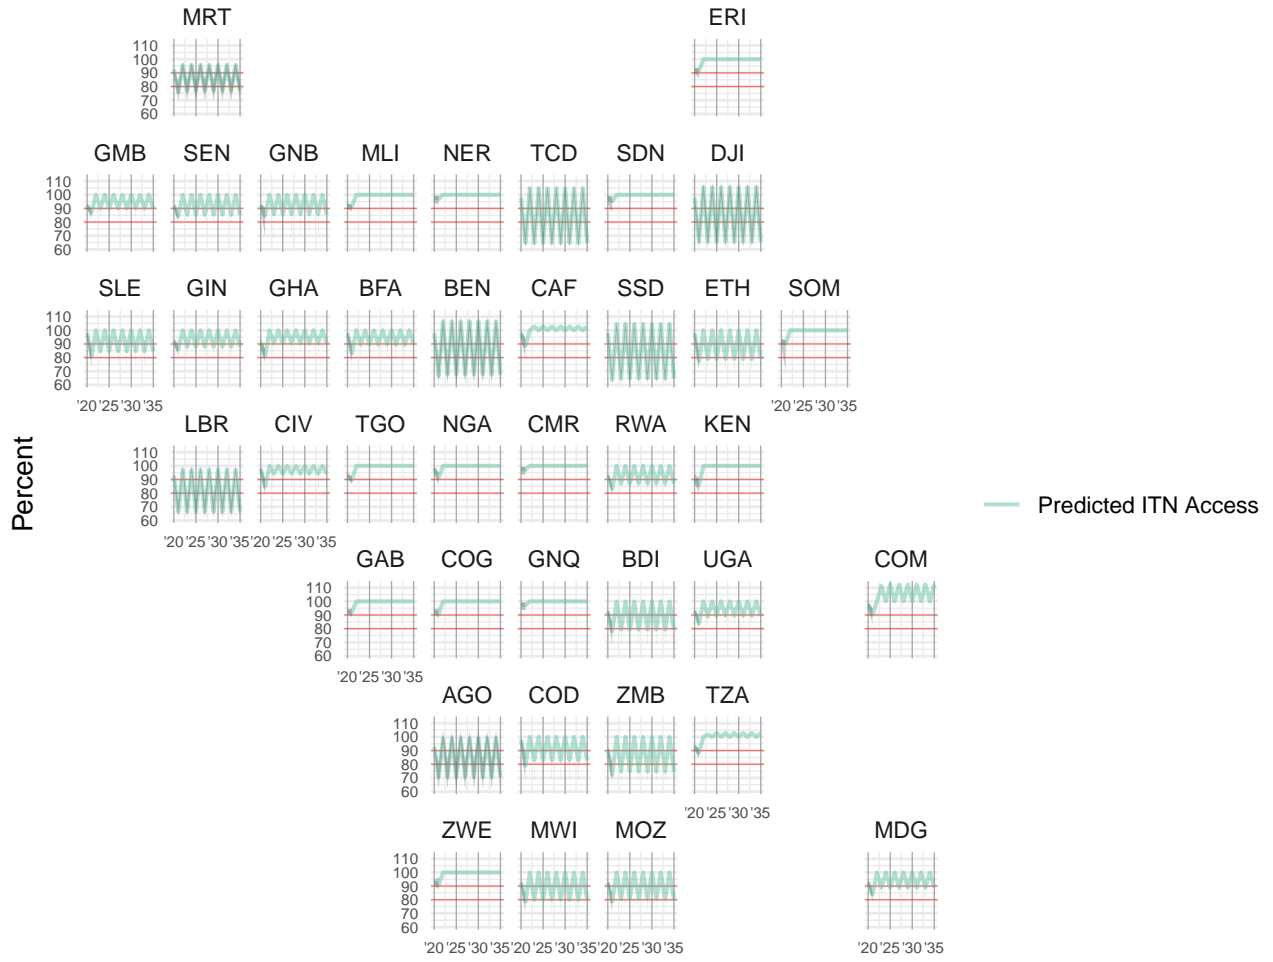

## 2-year mass campaigns with ANC/EPI, at population / 1.4

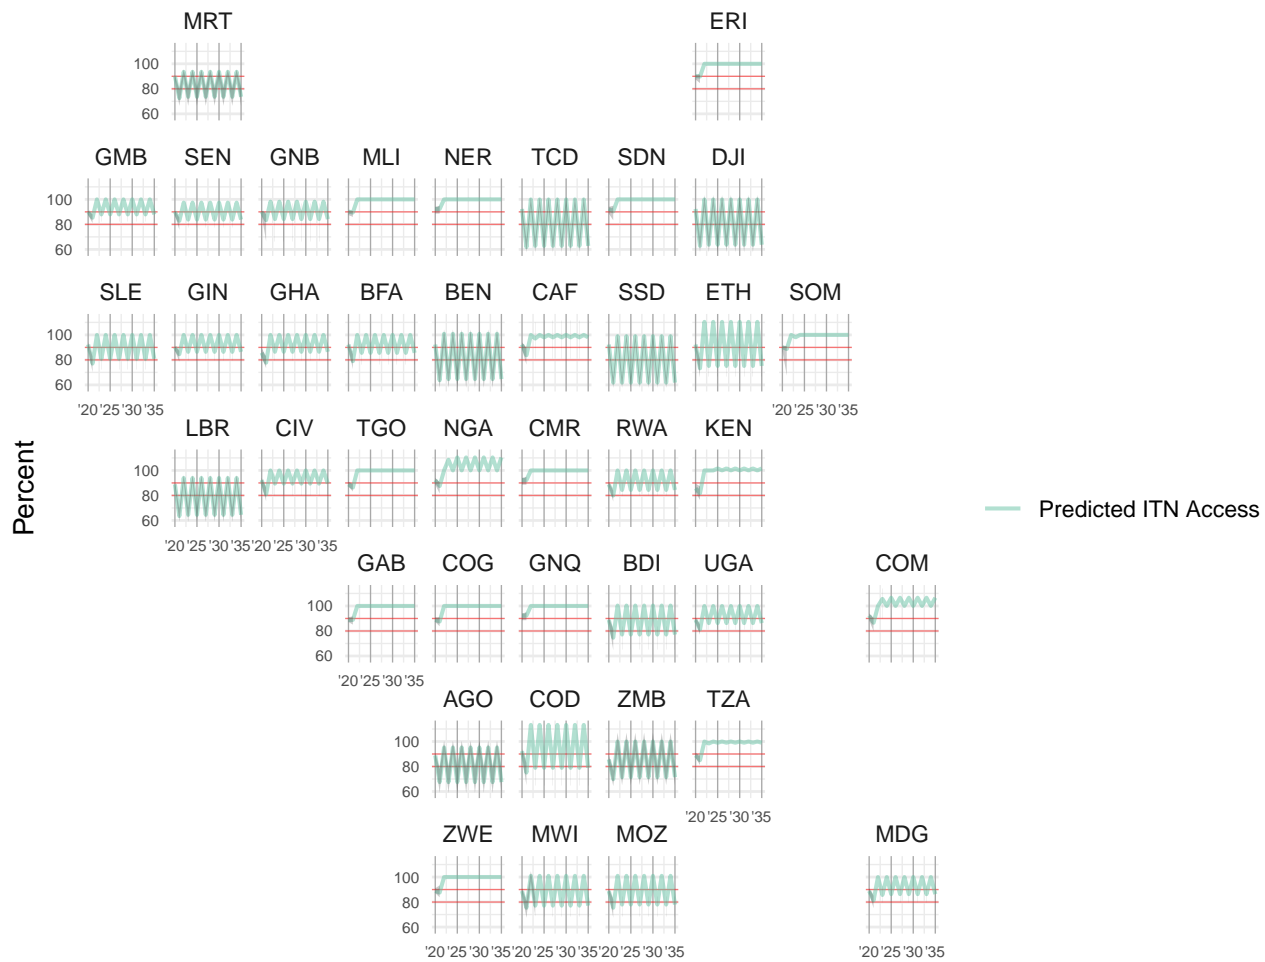

2-year mass campaigns with ANC/EPI,  
at population / 1.5

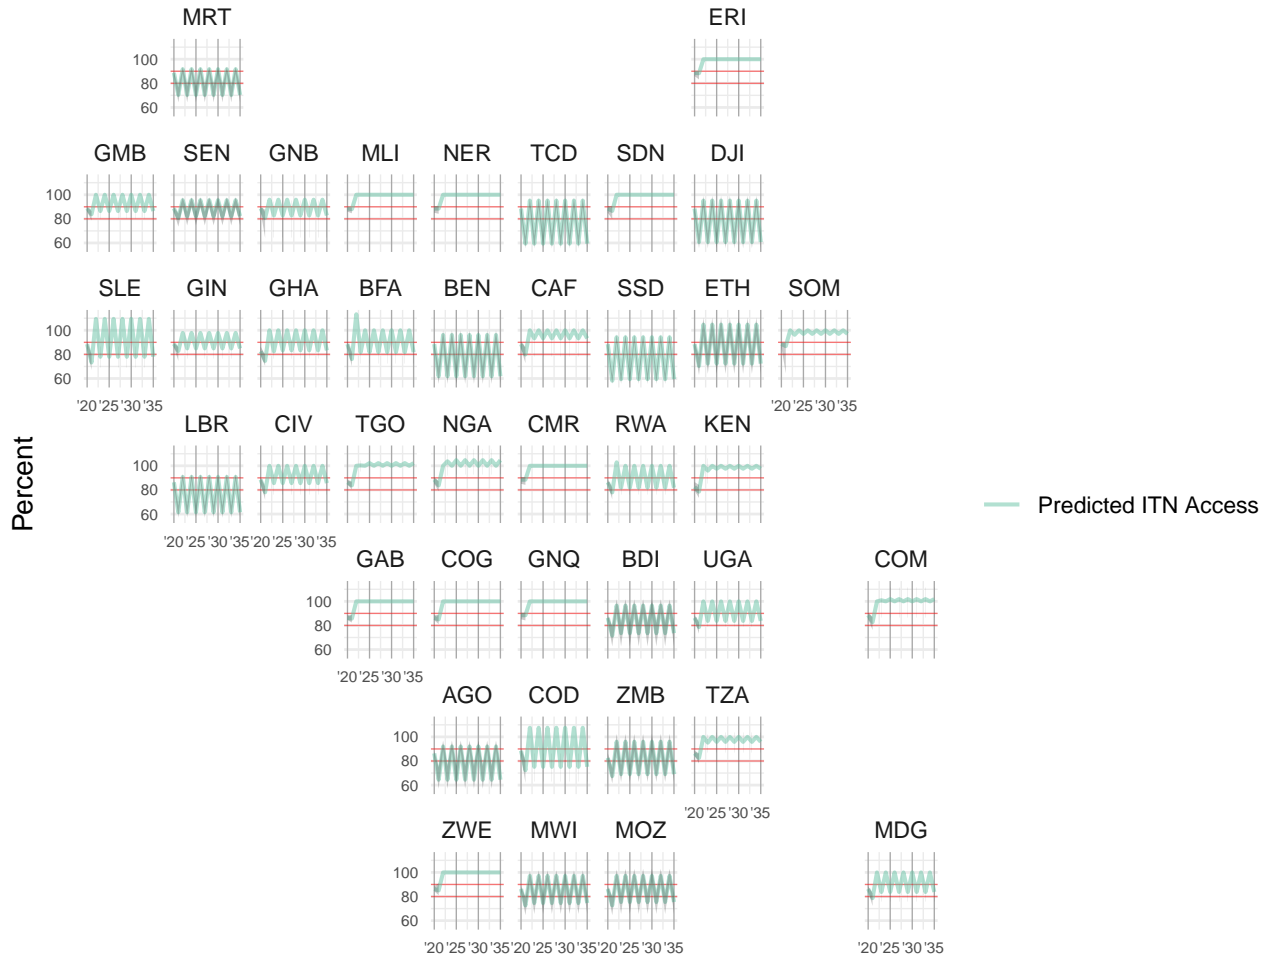

2-year mass campaigns with ANC/EPI,  
at population / 1.6

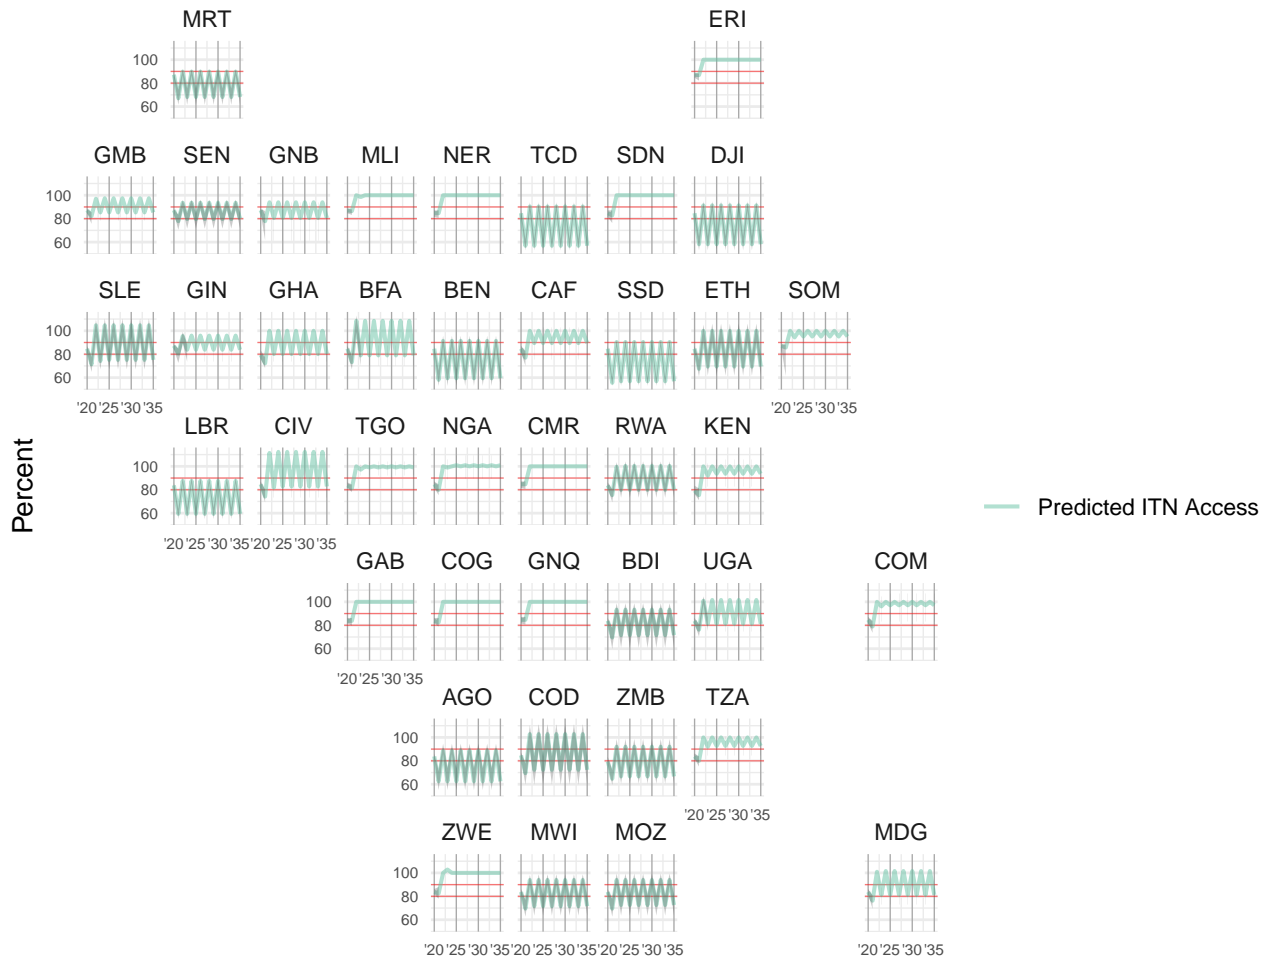



2-year mass campaigns with ANC/EPI,  
at population / 1.7

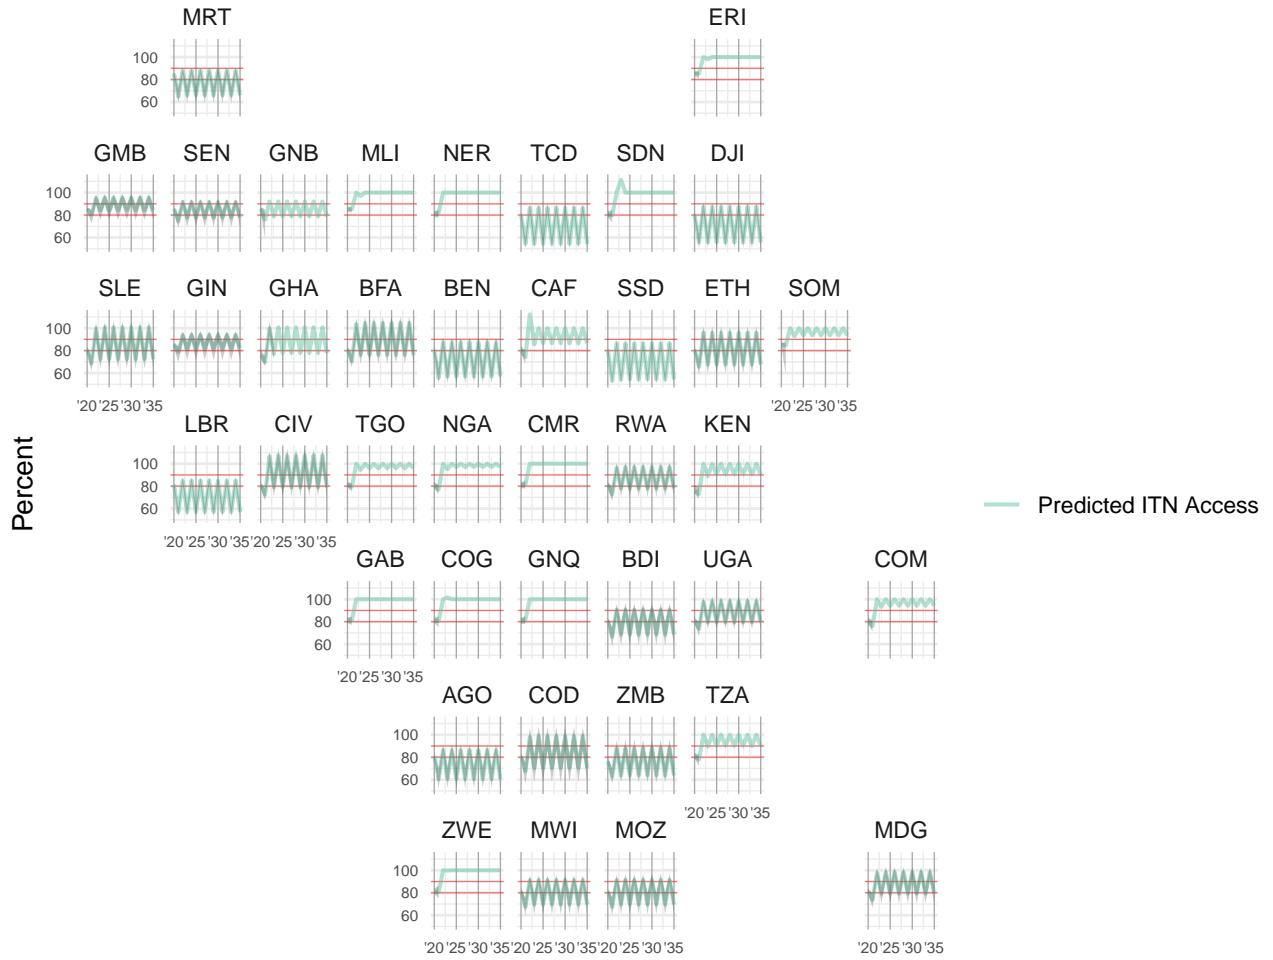

2-year mass campaigns with ANC/EPI,  
at population / 1.8

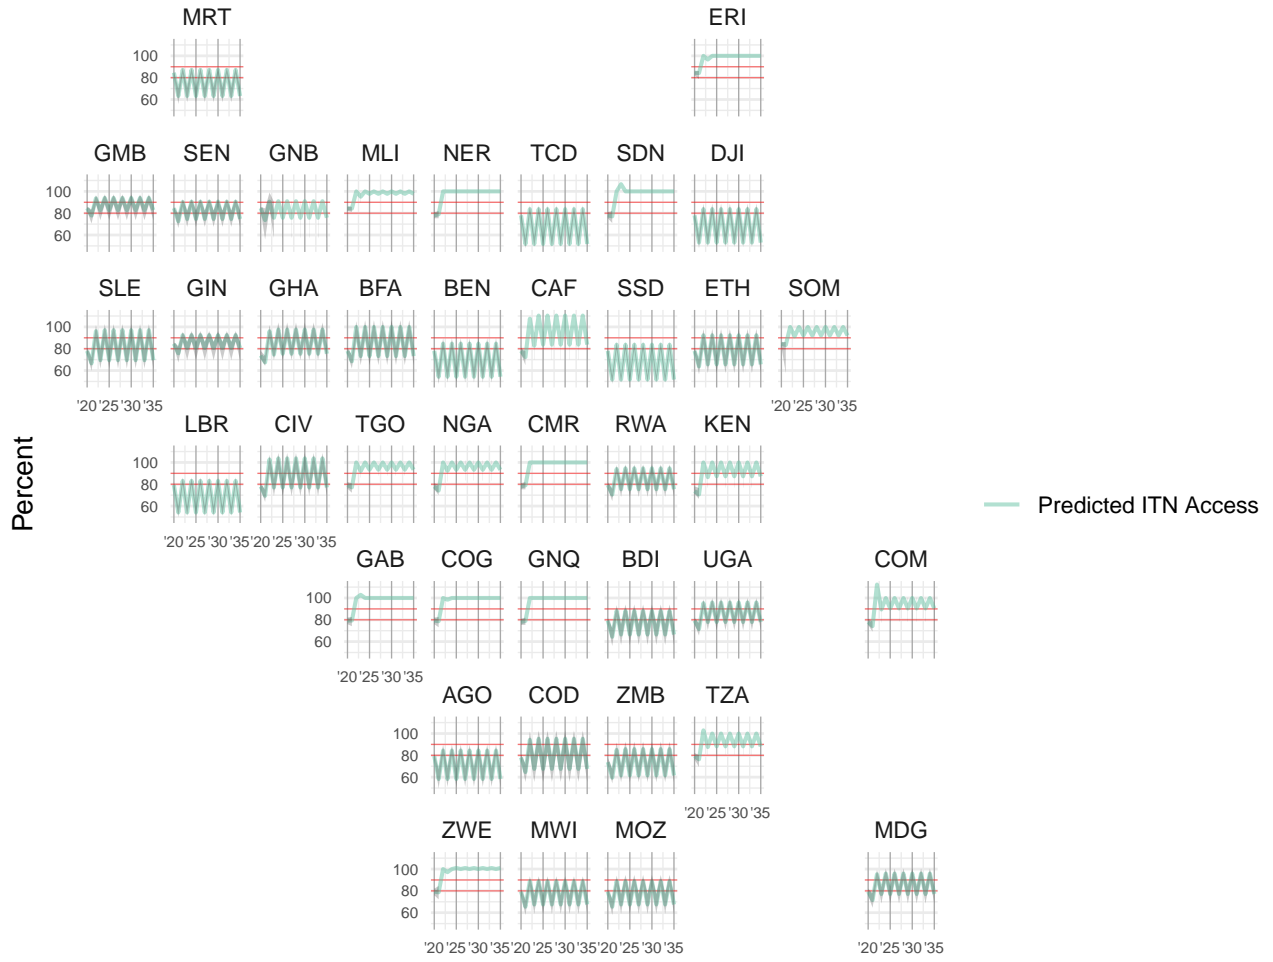

2-year mass campaigns with ANC/EPI,  
at population / 1.9

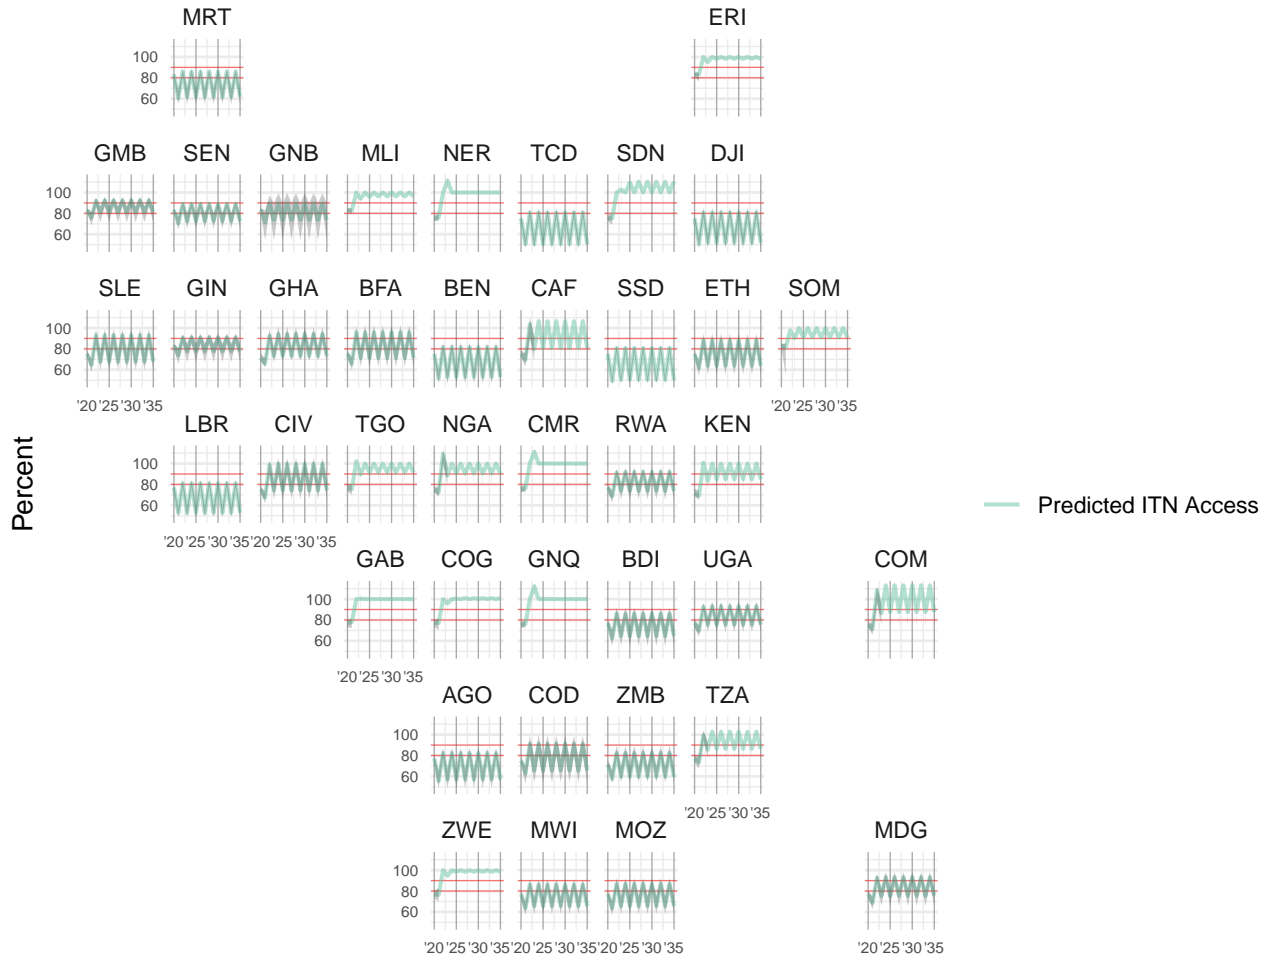

## 2-year mass campaigns with ANC/EPI, at population / 2

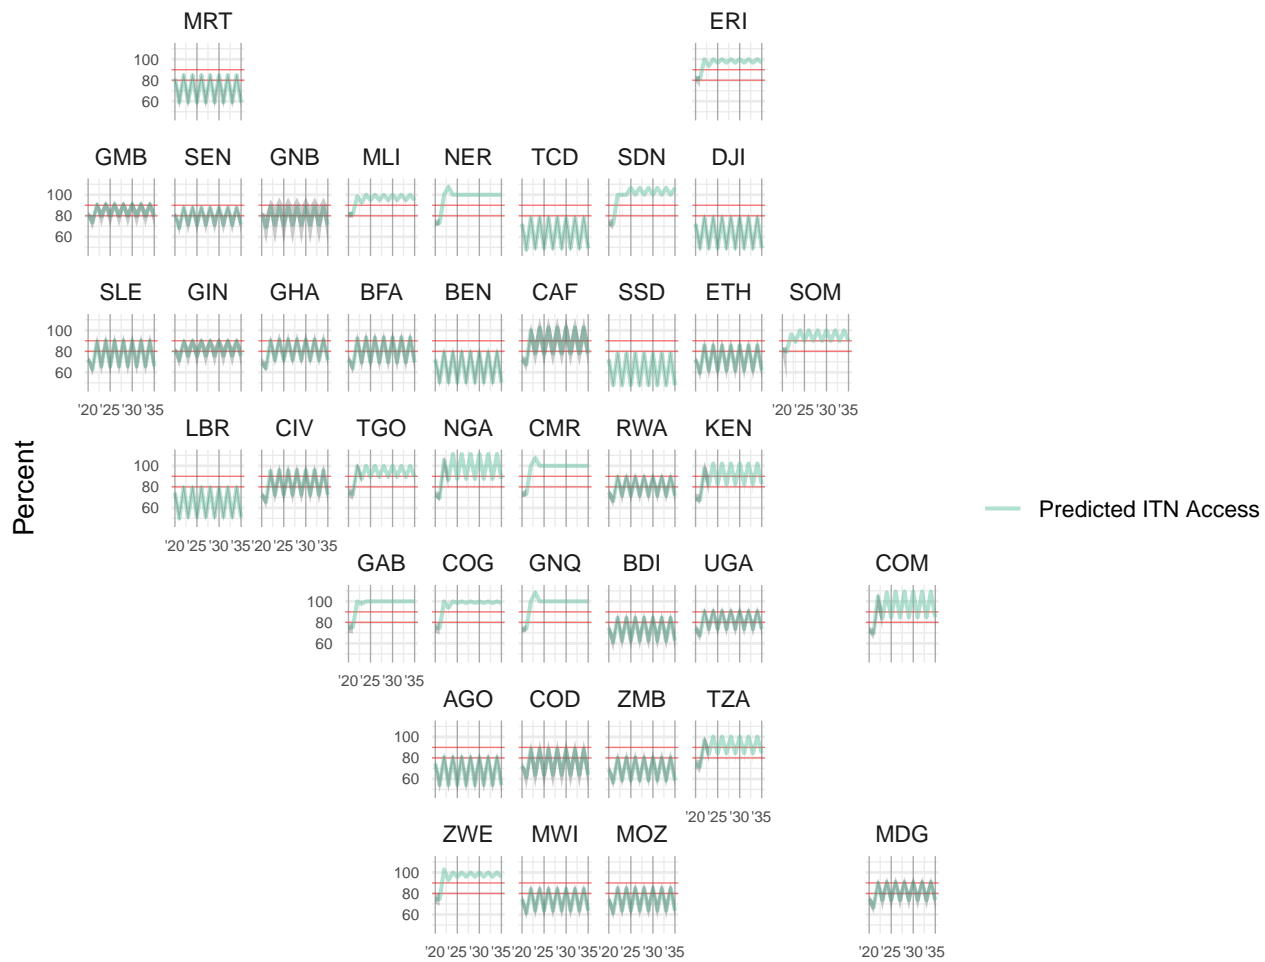

## 6 Scenario 6 - Two-year mass campaigns with varying ANC/EPI distribution

2-year mass campaigns with ANC/EPI at 5% of the population

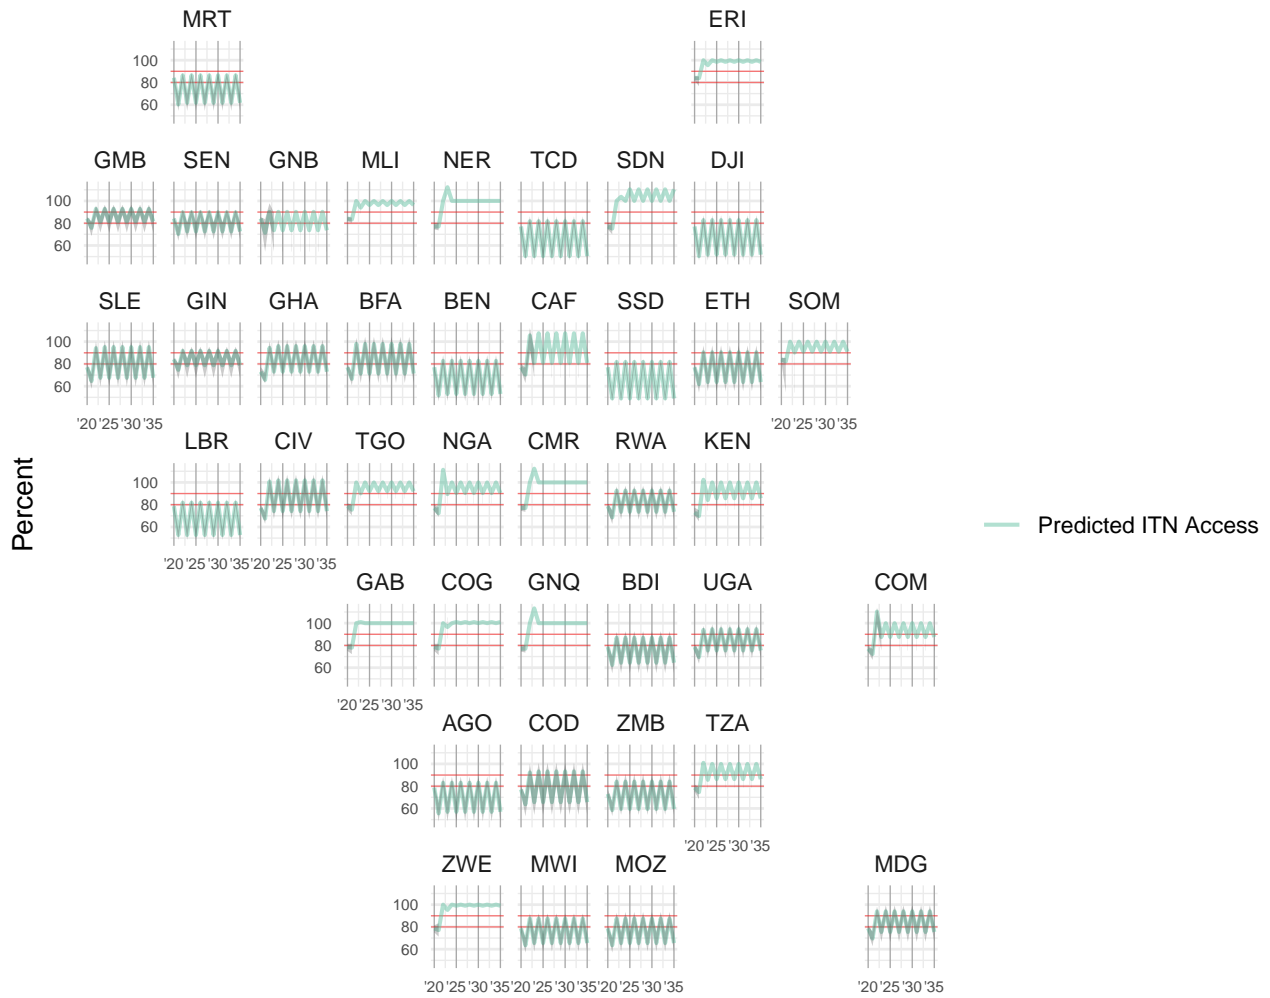

## 2-year mass campaigns with ANC/EPI at 6 % of the population

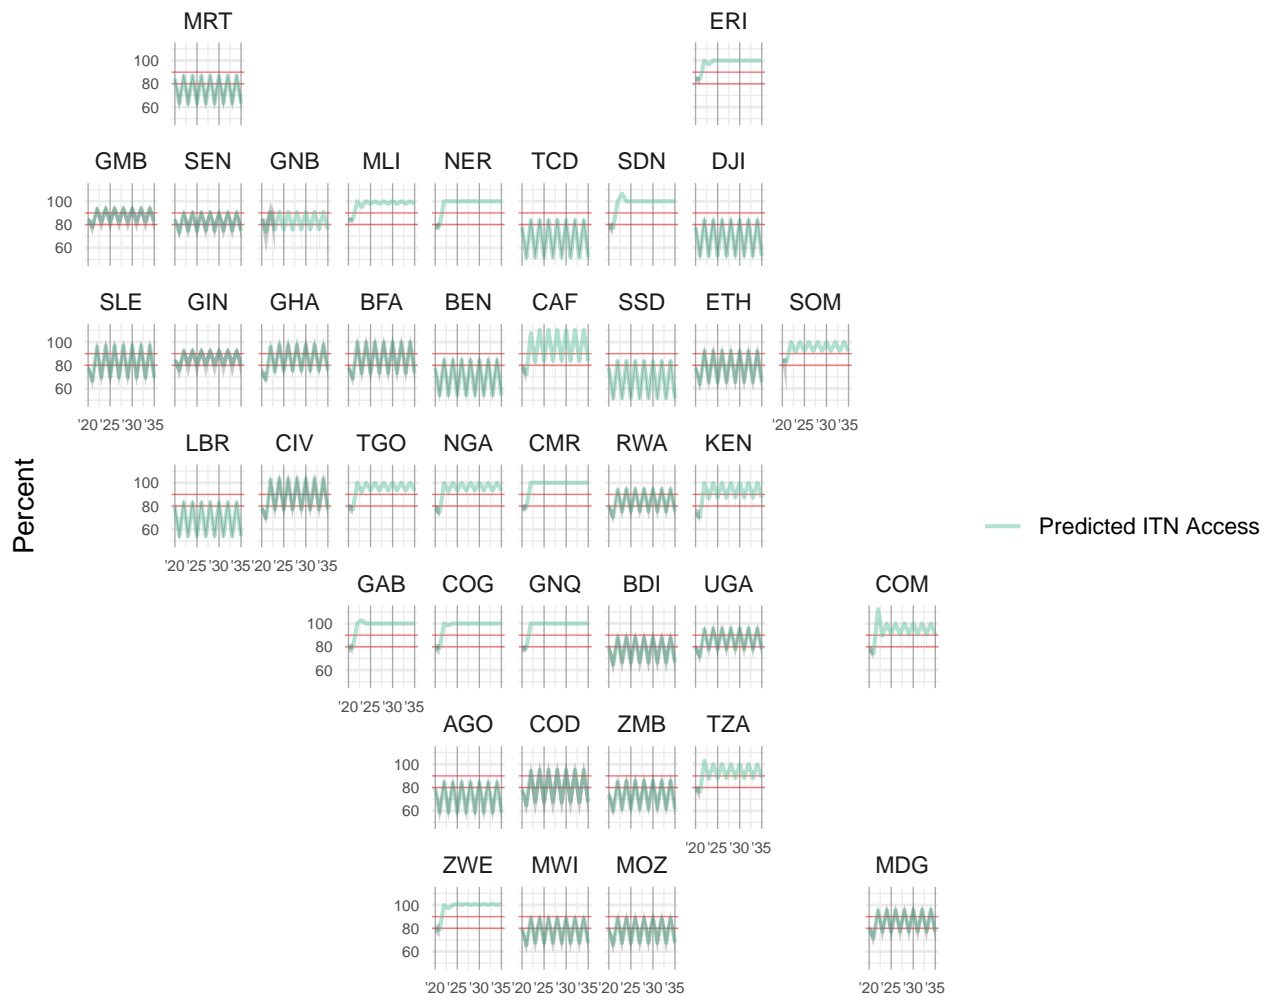

## 2-year mass campaigns with ANC/EPI at 7 % of the population

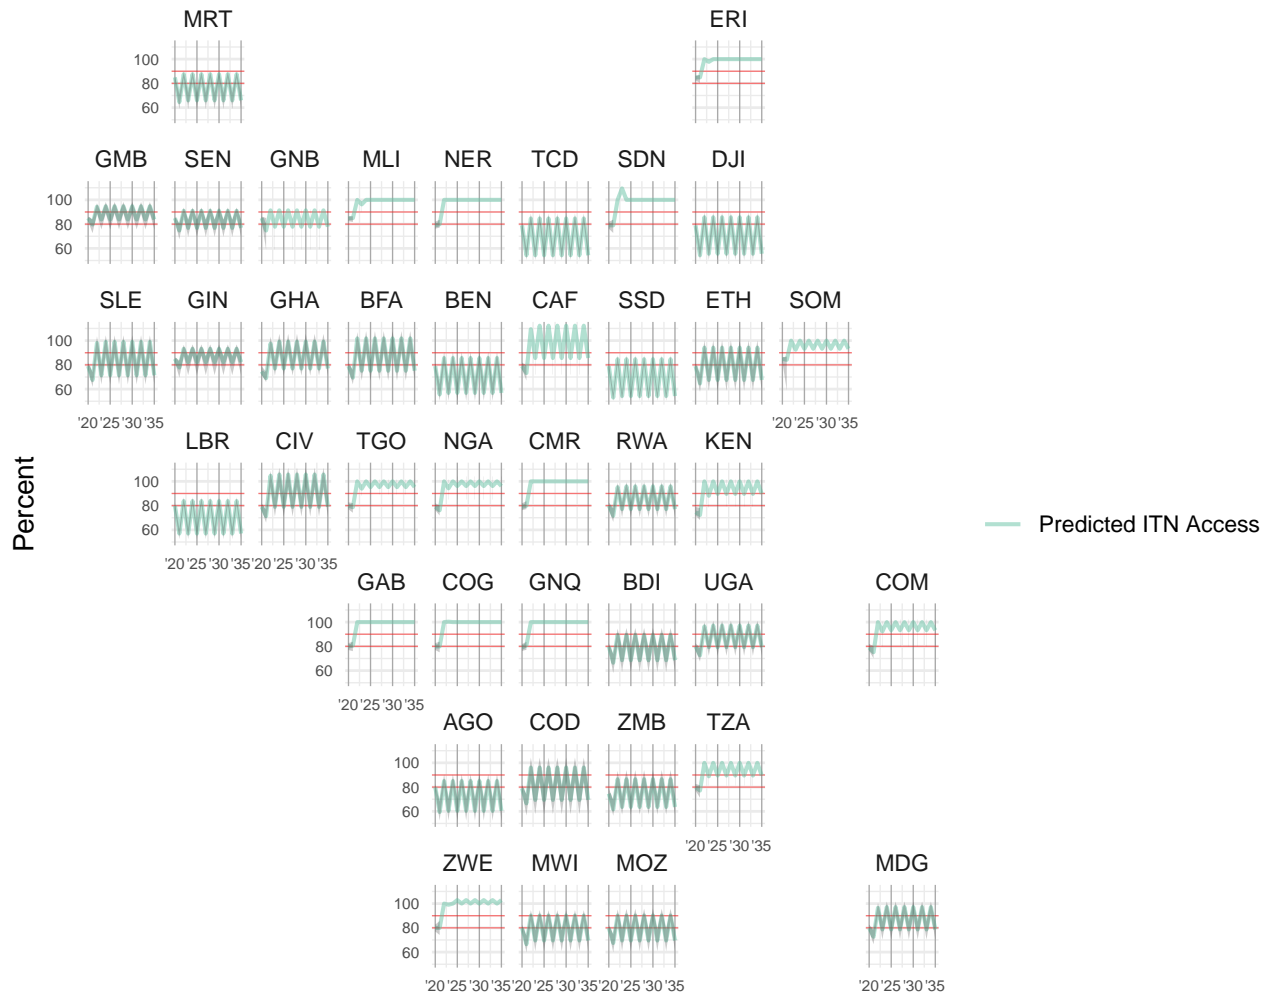

Supplement: MOESM1 [file 25561056]
