# Supplementary material for: How many mosquito nets are needed to maintain universal coverage: an update
Source: Springer Nature journal article supplement (doi:10.1186/s12936-023-04609-z), 2023-06-30
Supplement: MOESM3 [file 25561056]

# Additional File 3: Frontier plots for each country showing person-years of ITN access vs total nets required

Hannah Koenker

13 June, 2023

## **Contents**

**Frontier Plots (alpha order by ISO3 country code)**

**1**

**Frontier Plots (alpha order by ISO3 country code)**

Note: all countries use an illustrative population of 10,000,000 people.

AGO: 1.1 years median retention time

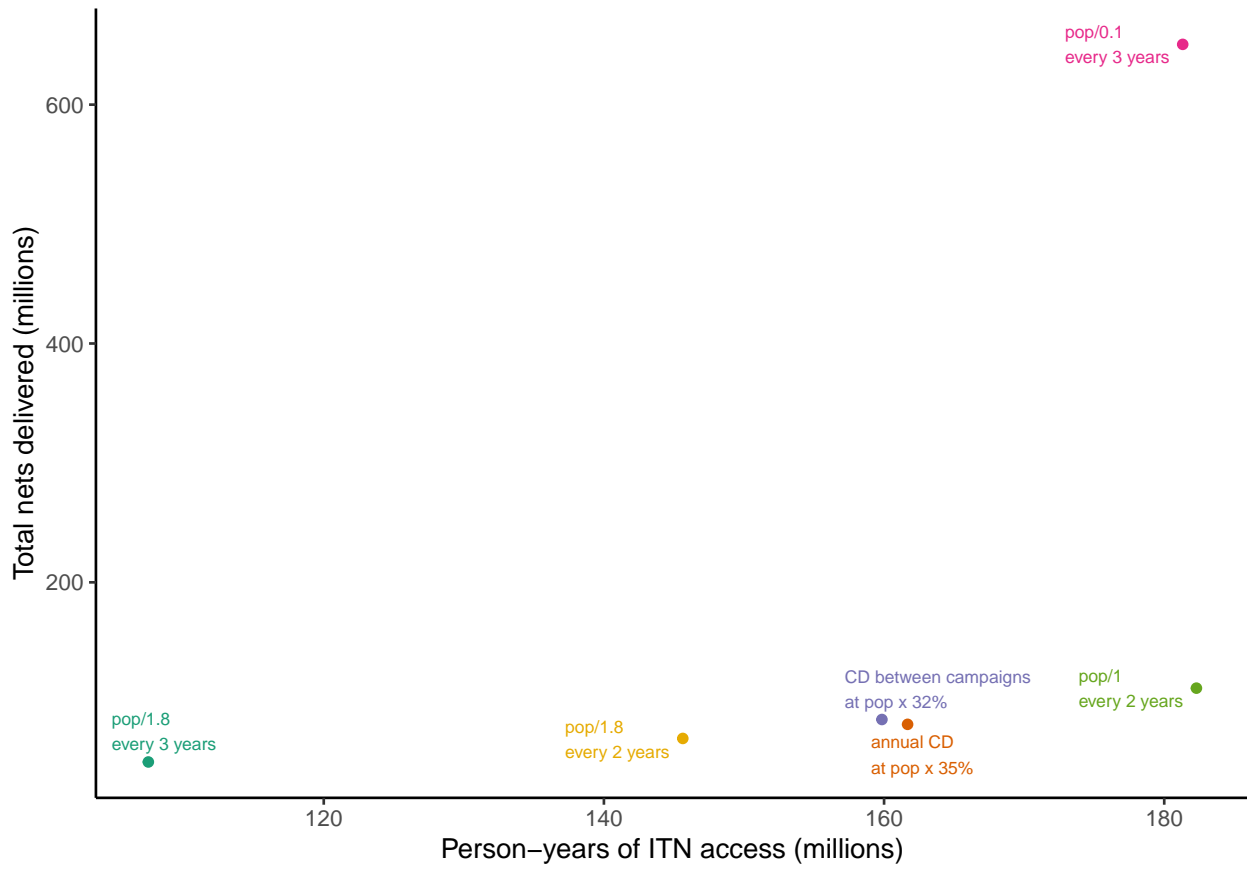

- Scenario
- Status Quo
  - Full scale CD
  - Campaigns + CD
  - 3-year campaigns
  - 2-year campaigns
  - 2-year campaigns (pop/1.8)

BDI: 1.31 years median retention time

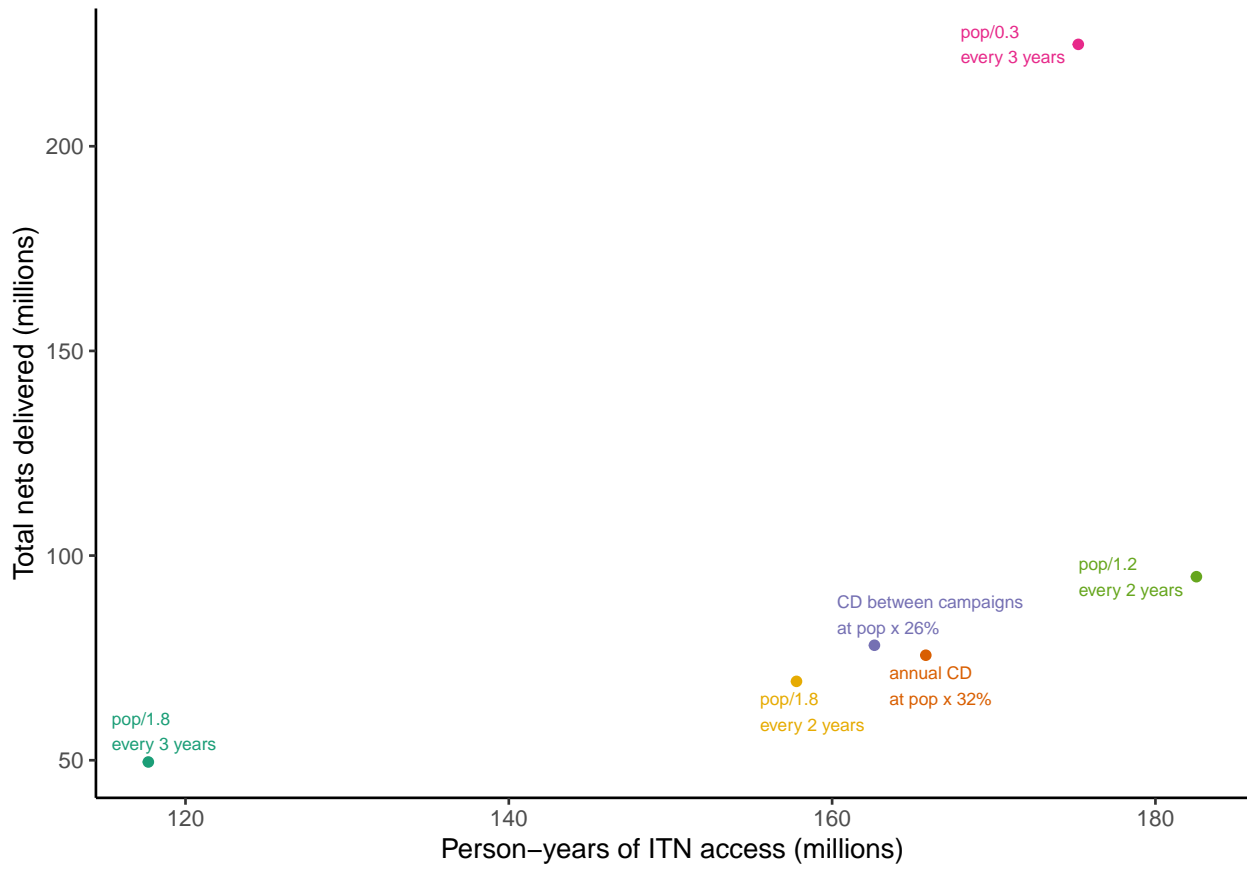

- Scenario
- Status Quo
  - Full scale CD
  - Campaigns + CD
  - 3-year campaigns
  - 2-year campaigns
  - 2-year campaigns (pop/1.8)

BEN: 1.07 years median retention time

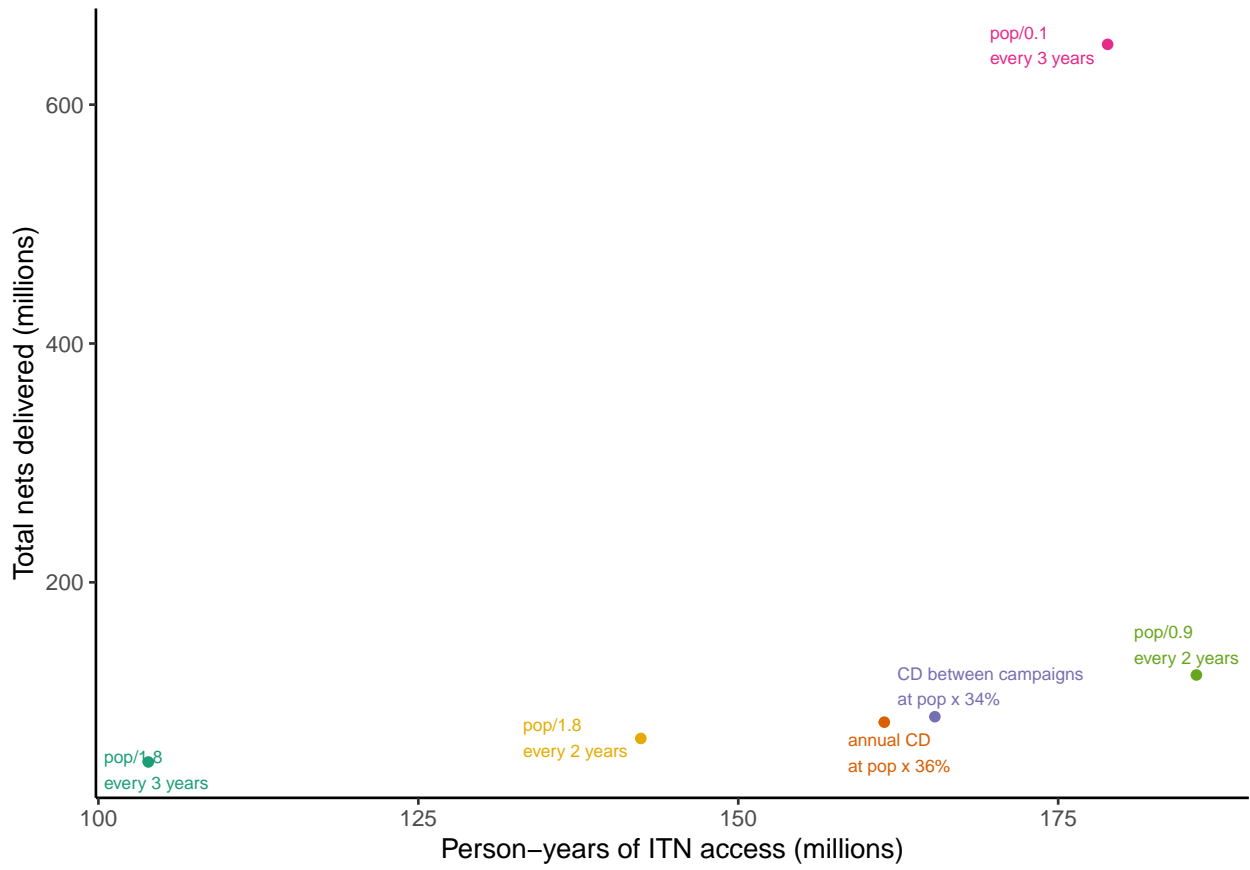

- Scenario
- Status Quo
  - Full scale CD
  - Campaigns + CD
  - 3-year campaigns
  - 2-year campaigns
  - 2-year campaigns (pop/1.8)

BFA: 1.58 years median retention time

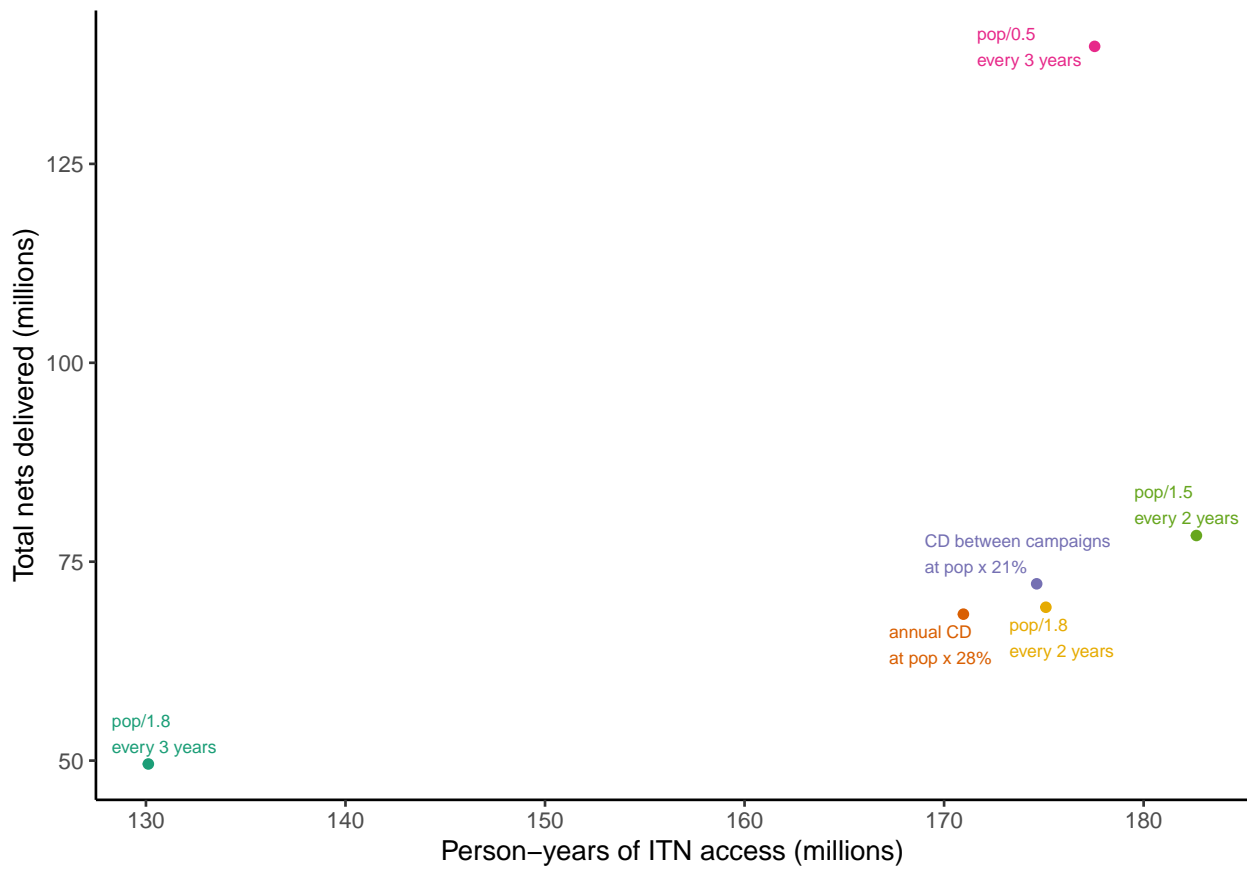

- Scenario
- Status Quo
  - Full scale CD
  - Campaigns + CD
  - 3-year campaigns
  - 2-year campaigns
  - 2-year campaigns (pop/1.8)

CAF: 1.9 years median retention time

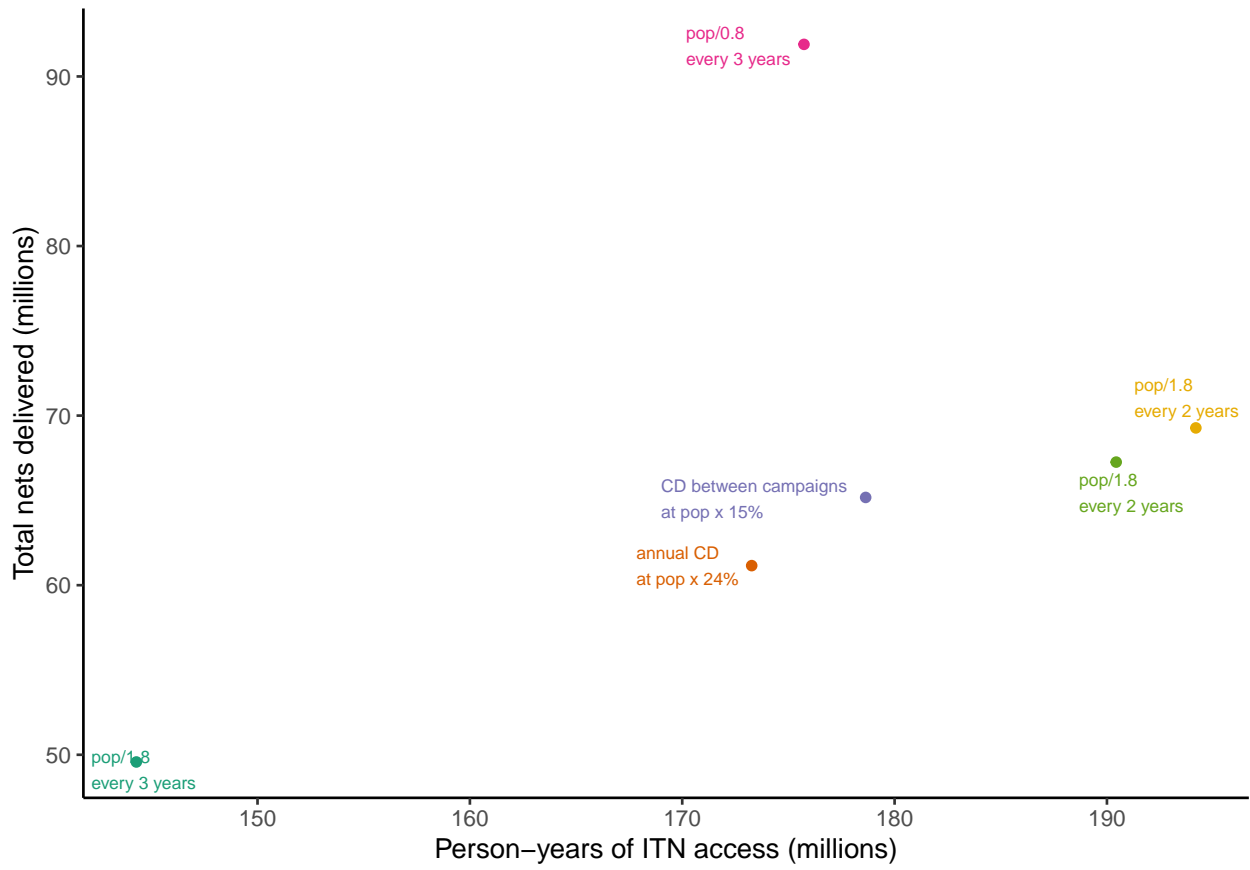

- Scenario
- Status Quo
  - Full scale CD
  - Campaigns + CD
  - 3-year campaigns
  - 2-year campaigns
  - 2-year campaigns (pop/1.8)

CIV: 1.69 years median retention time

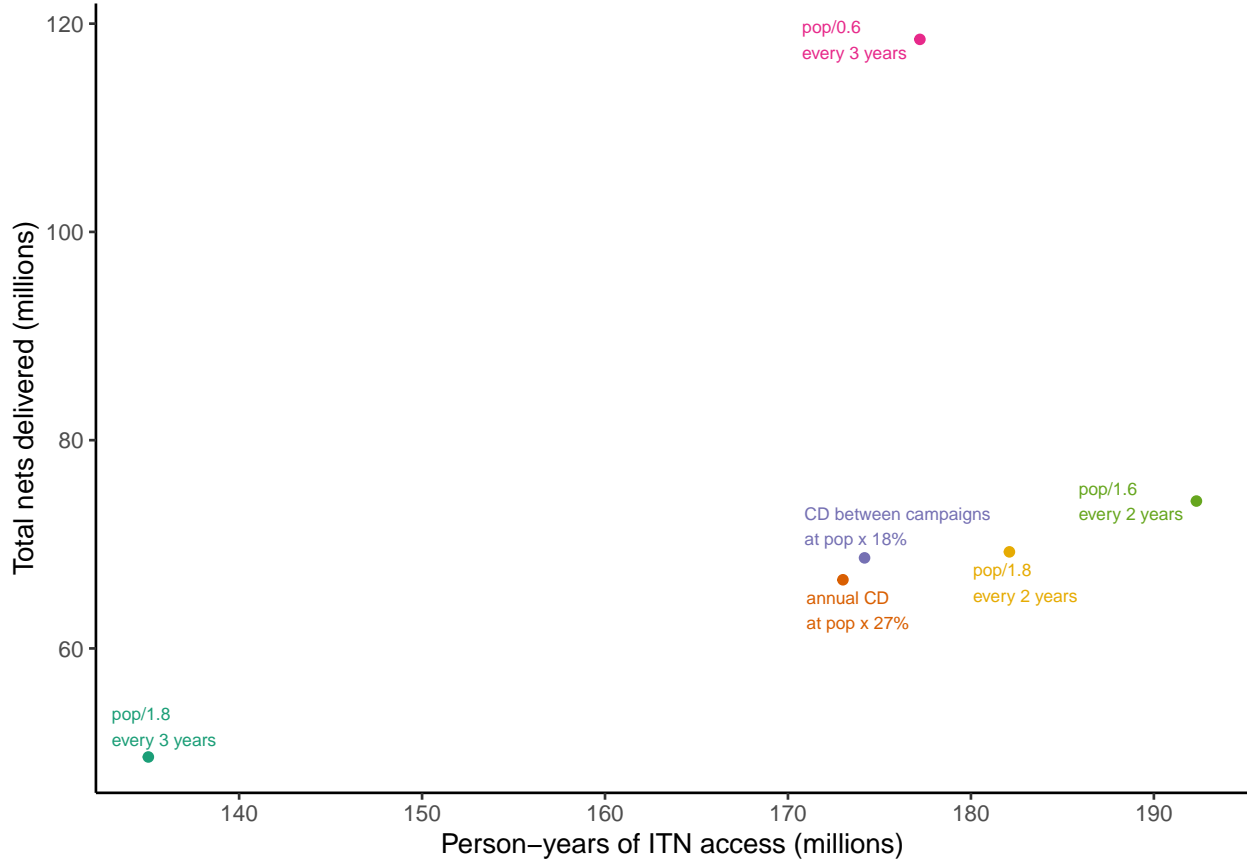

- Scenario
- Status Quo
  - Full scale CD
  - Campaigns + CD
  - 3-year campaigns
  - 2-year campaigns
  - 2-year campaigns (pop/1.8)

CMR: 3.49 years median retention time

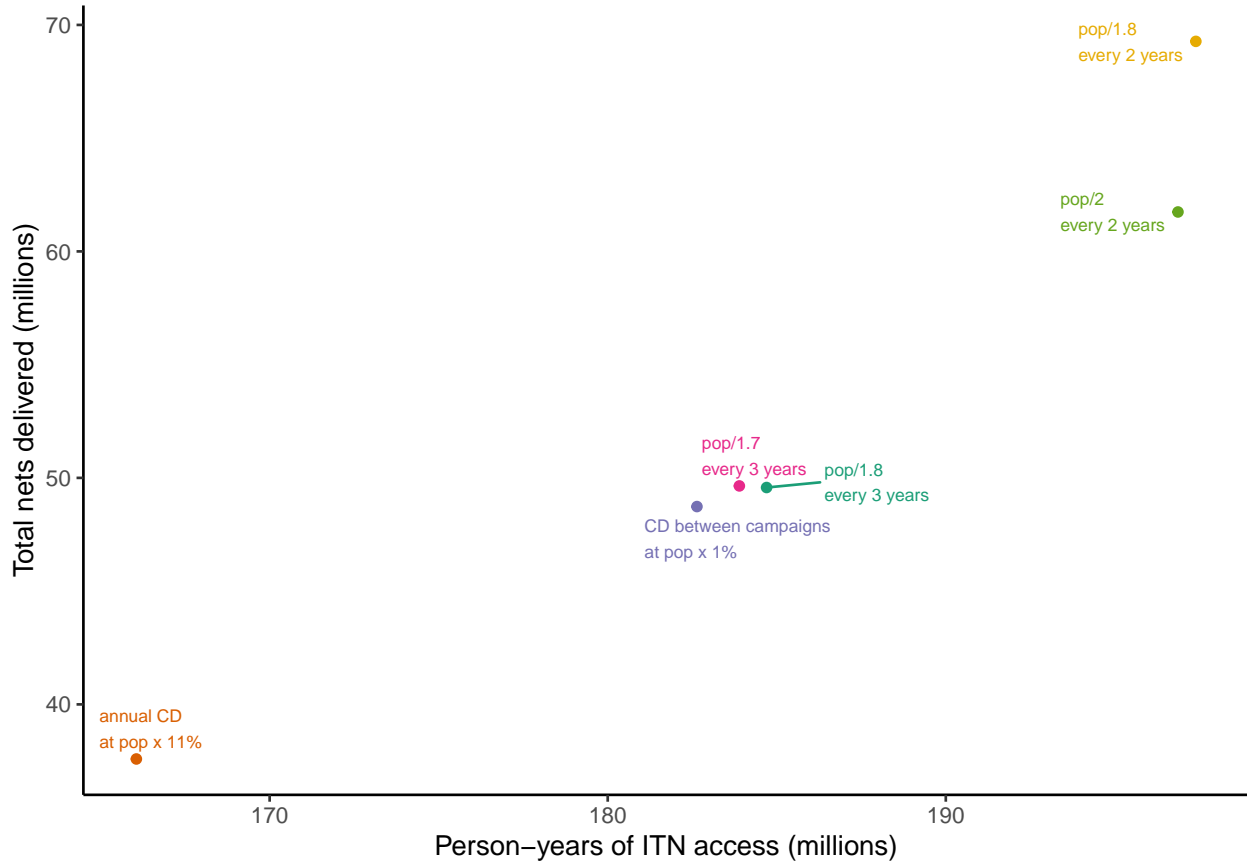

- Scenario
- Status Quo
  - Full scale CD
  - Campaigns + CD
  - 3-year campaigns
  - 2-year campaigns
  - 2-year campaigns (pop/1.8)



COD: 1.41 years median retention time

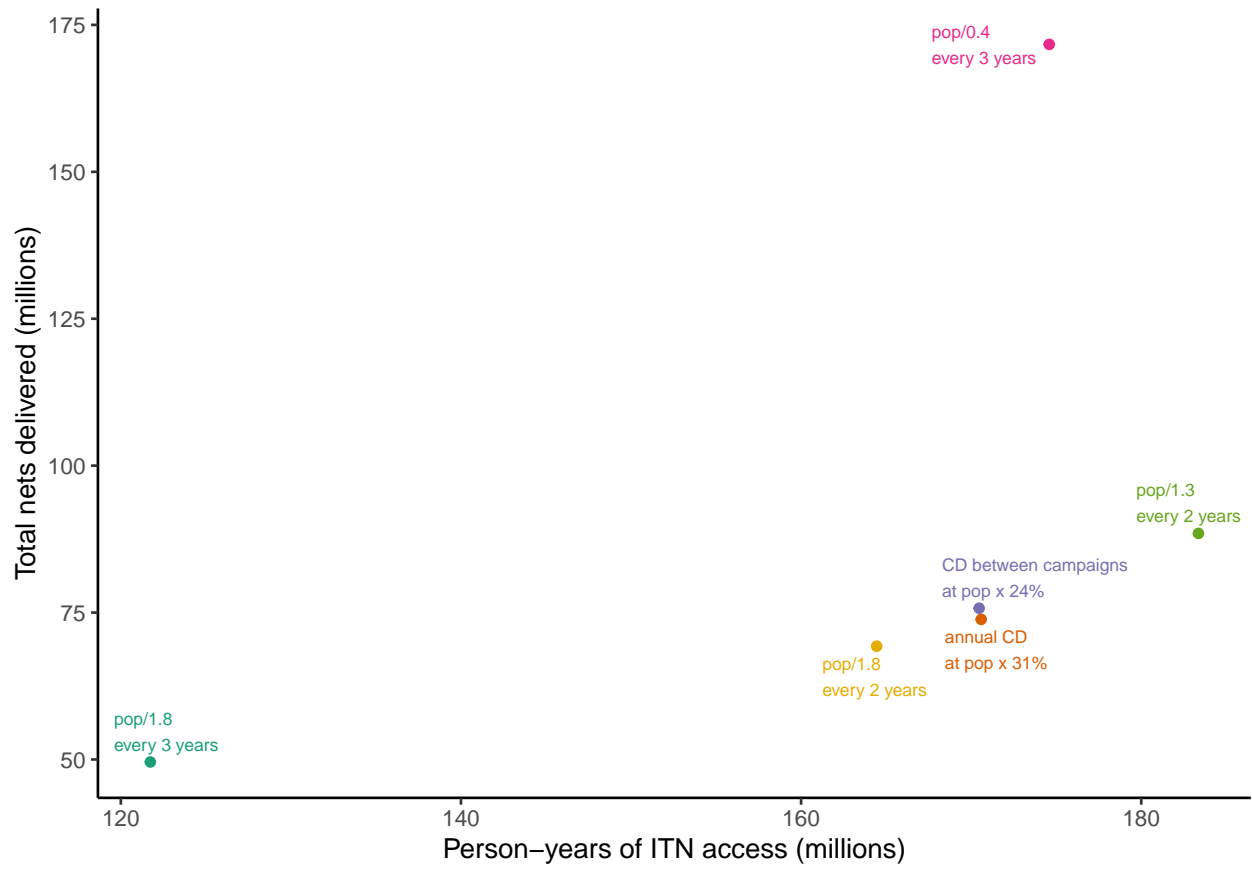

- Scenario
- Status Quo
  - Full scale CD
  - Campaigns + CD
  - 3-year campaigns
  - 2-year campaigns
  - 2-year campaigns (pop/1.8)

COG: 2.91 years median retention time

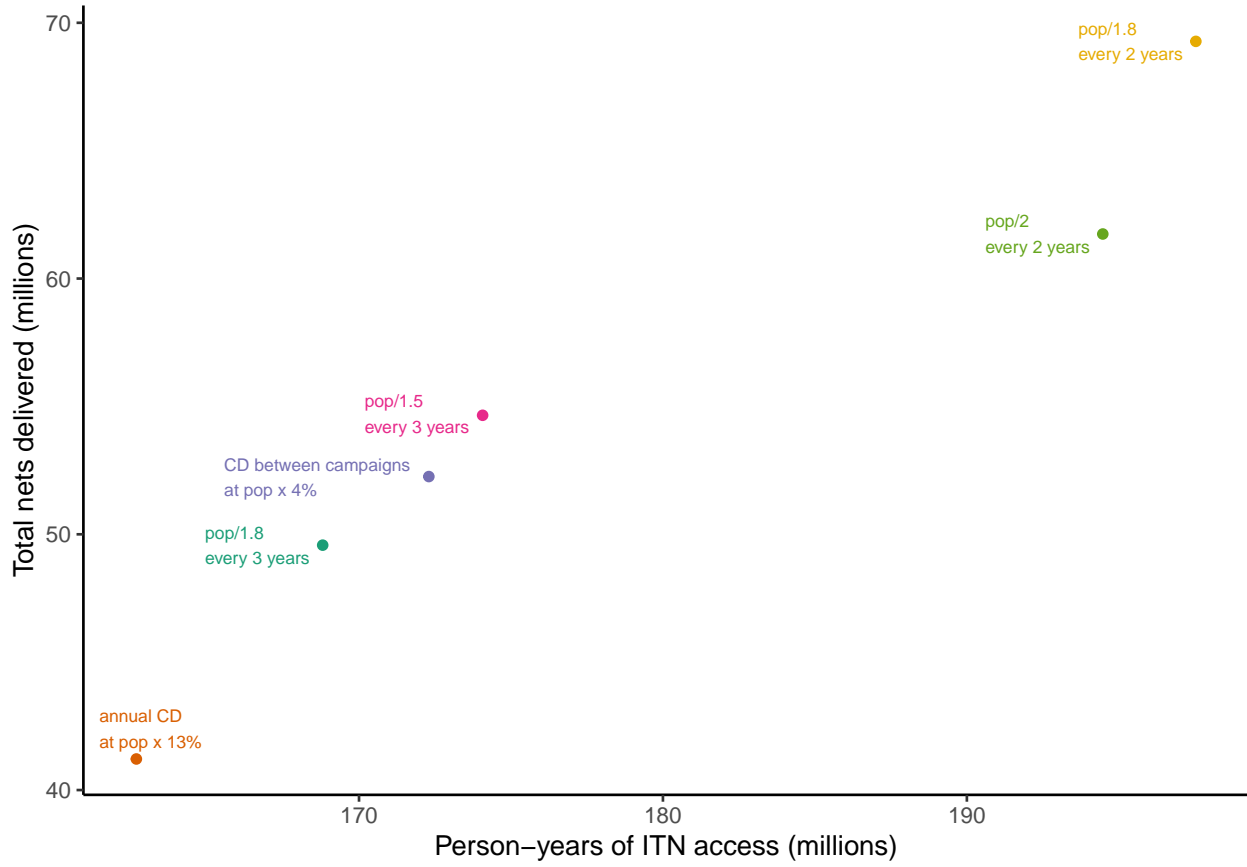

- Scenario
- Status Quo
  - Full scale CD
  - Campaigns + CD
  - 3-year campaigns
  - 2-year campaigns
  - 2-year campaigns (pop/1.8)

COM: 2.13 years median retention time

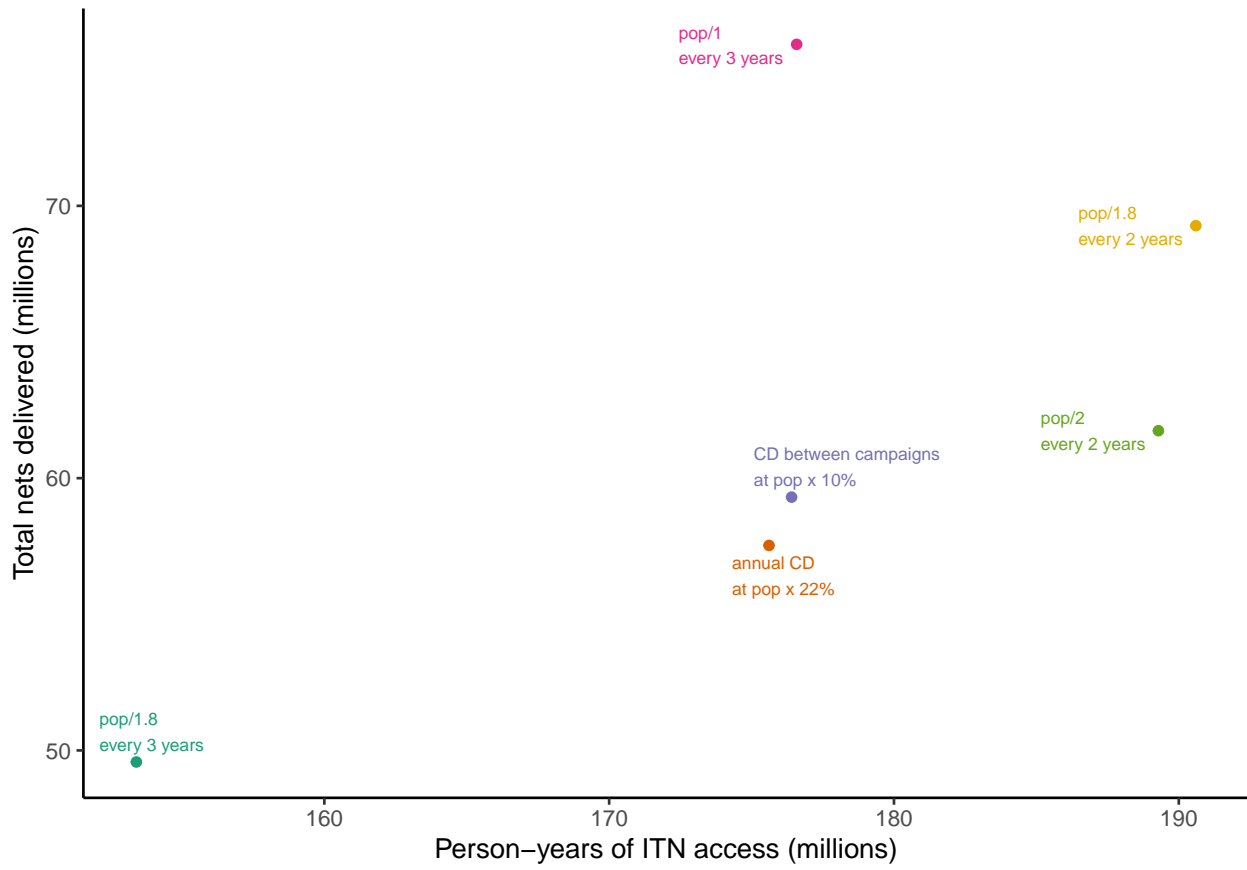

- Scenario
- Status Quo
  - Full scale CD
  - Campaigns + CD
  - 3-year campaigns
  - 2-year campaigns
  - 2-year campaigns (pop/1.8)

DJI: 1.05 years median retention time

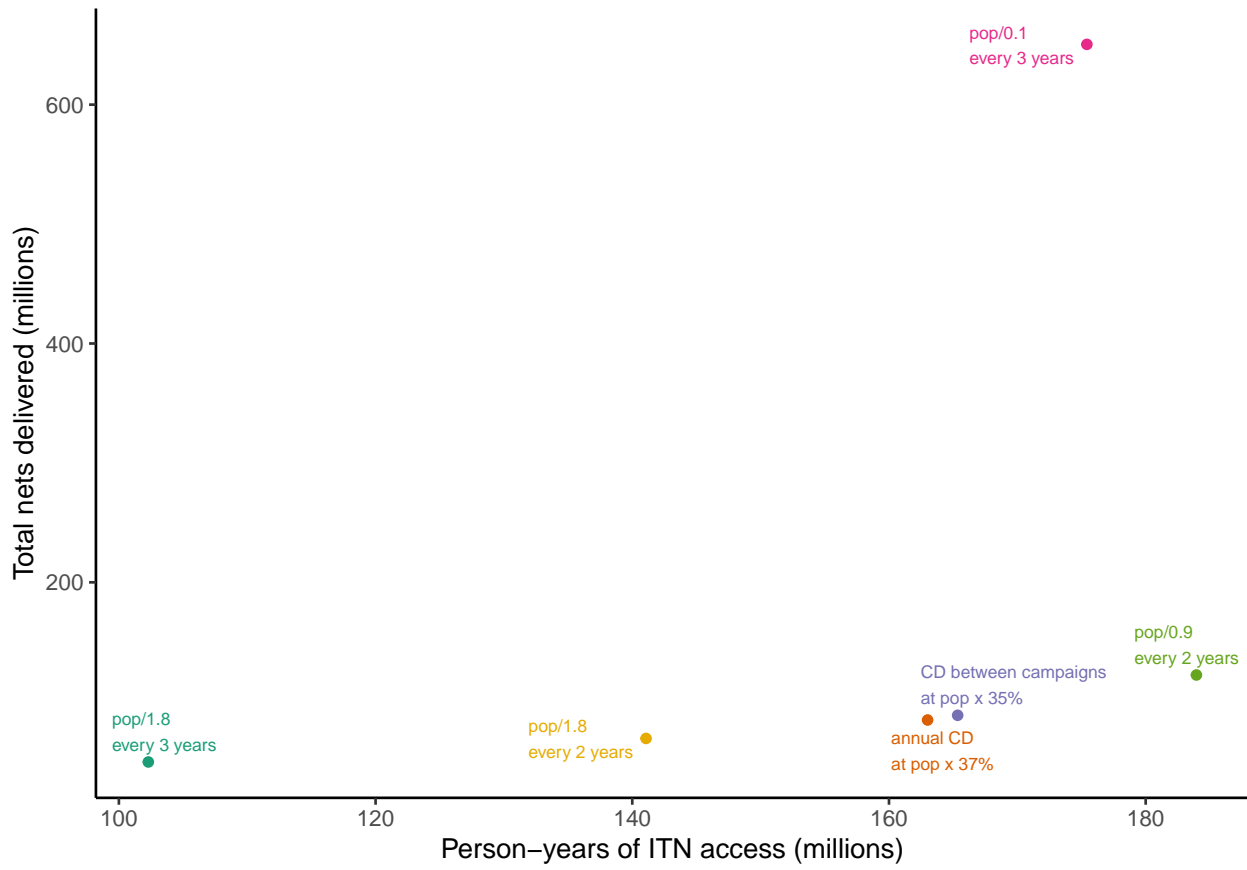

- Scenario
- Status Quo
  - Full scale CD
  - Campaigns + CD
  - 3-year campaigns
  - 2-year campaigns
  - 2-year campaigns (pop/1.8)

ERI: 3.01 years median retention time

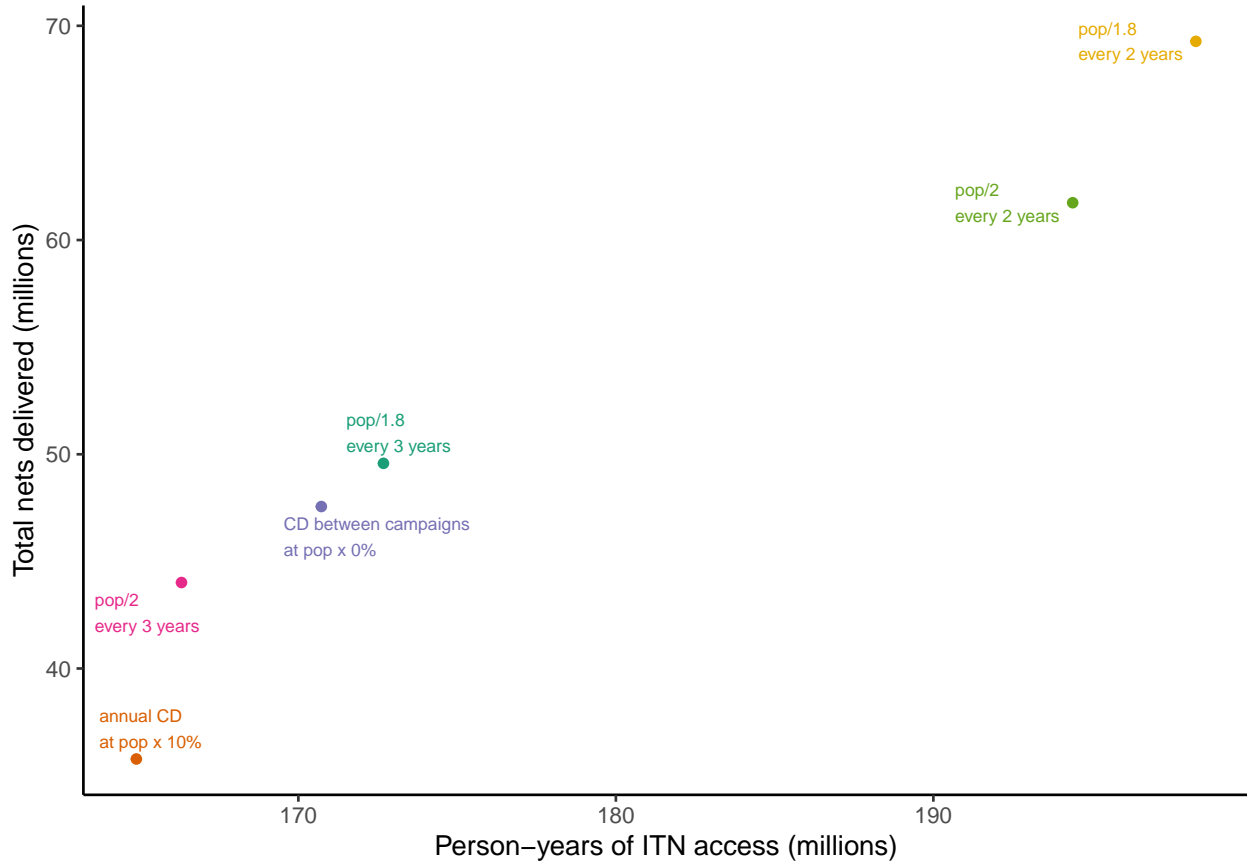

- Scenario
- Status Quo
  - Full scale CD
  - Campaigns + CD
  - 3-year campaigns
  - 2-year campaigns
  - 2-year campaigns (pop/1.8)

ETH: 1.33 years median retention time

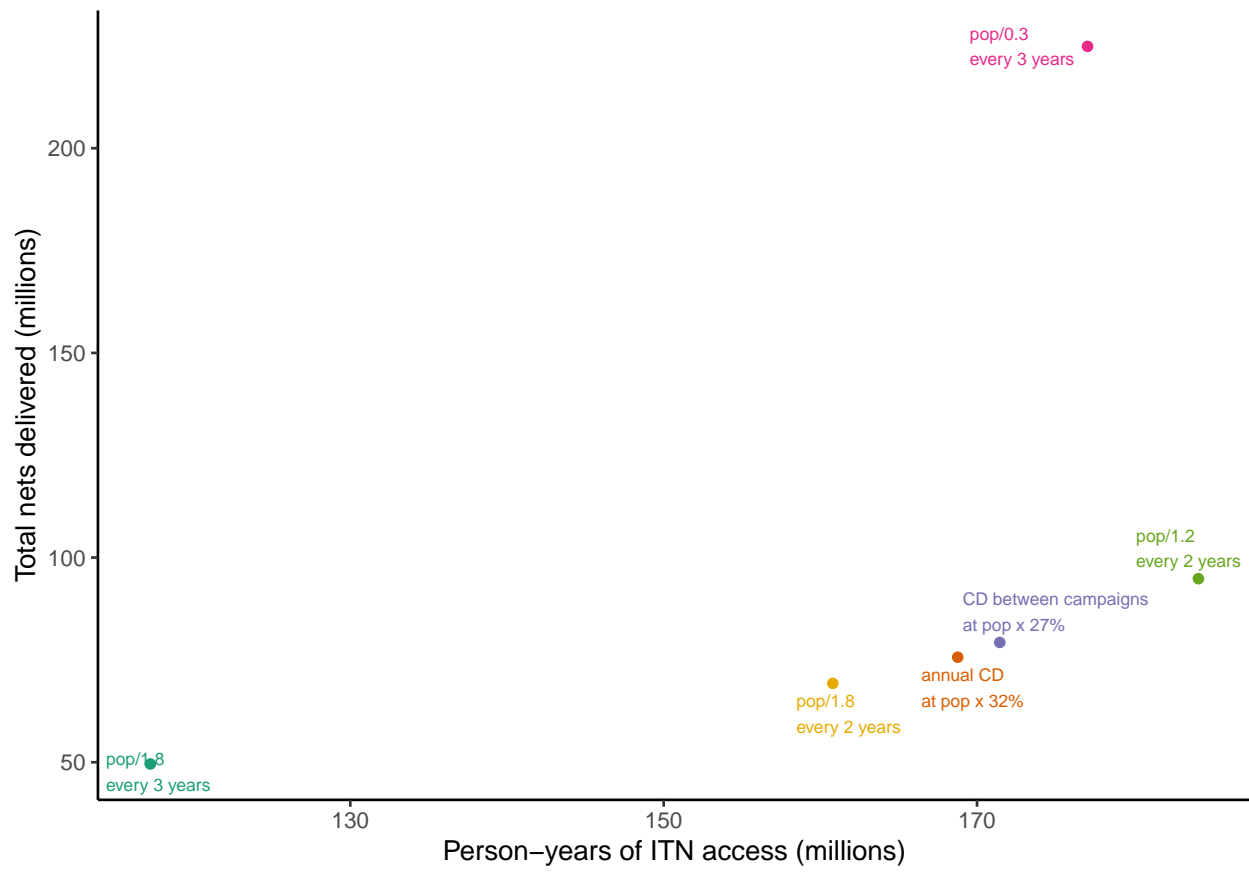

- Scenario
- Status Quo
  - Full scale CD
  - Campaigns + CD
  - 3-year campaigns
  - 2-year campaigns
  - 2-year campaigns (pop/1.8)

GAB: 3.34 years median retention time

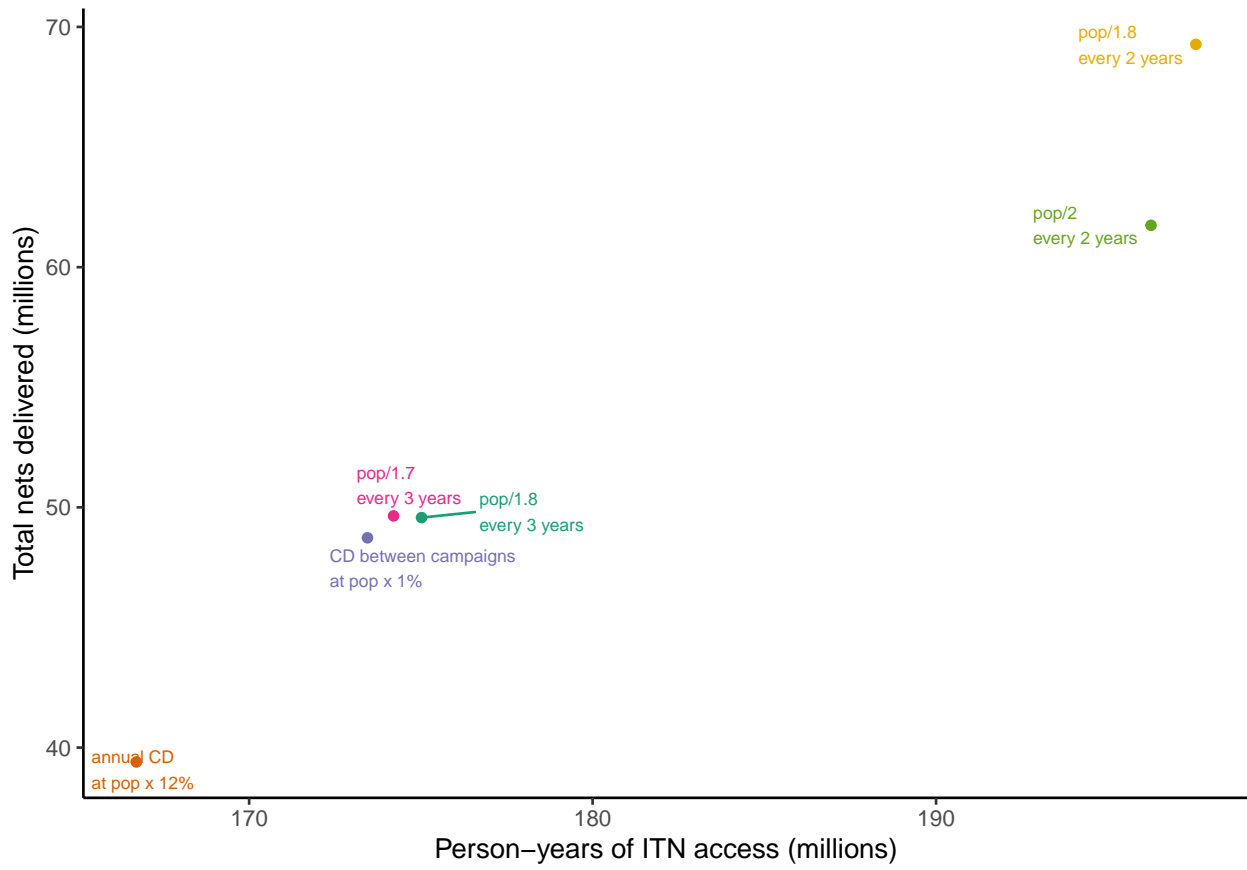

- Scenario
- Status Quo
  - Full scale CD
  - Campaigns + CD
  - 3-year campaigns
  - 2-year campaigns
  - 2-year campaigns (pop/1.8)

GHA: 1.78 years median retention time

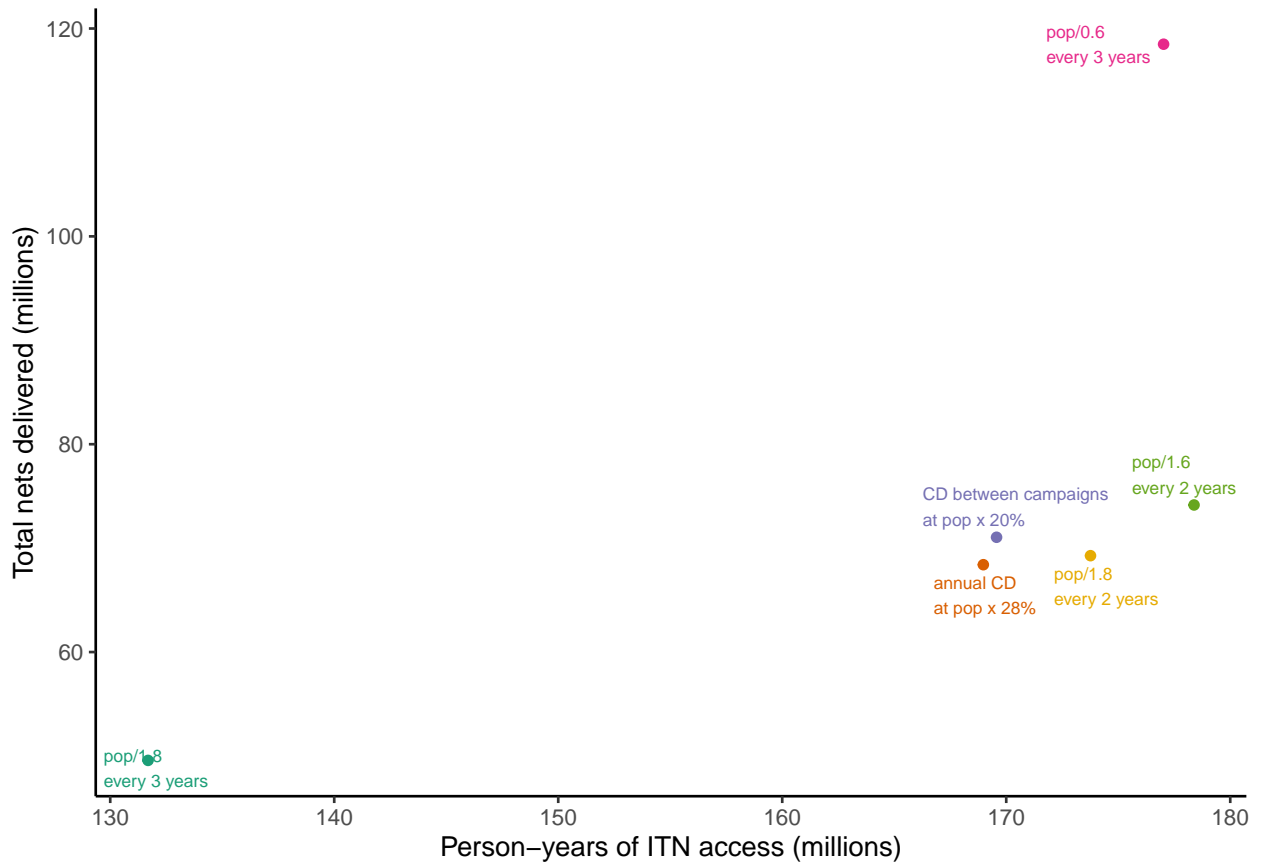

- Scenario
- Status Quo
  - Full scale CD
  - Campaigns + CD
  - 3-year campaigns
  - 2-year campaigns
  - 2-year campaigns (pop/1.8)



GIN: 1.51 years median retention time

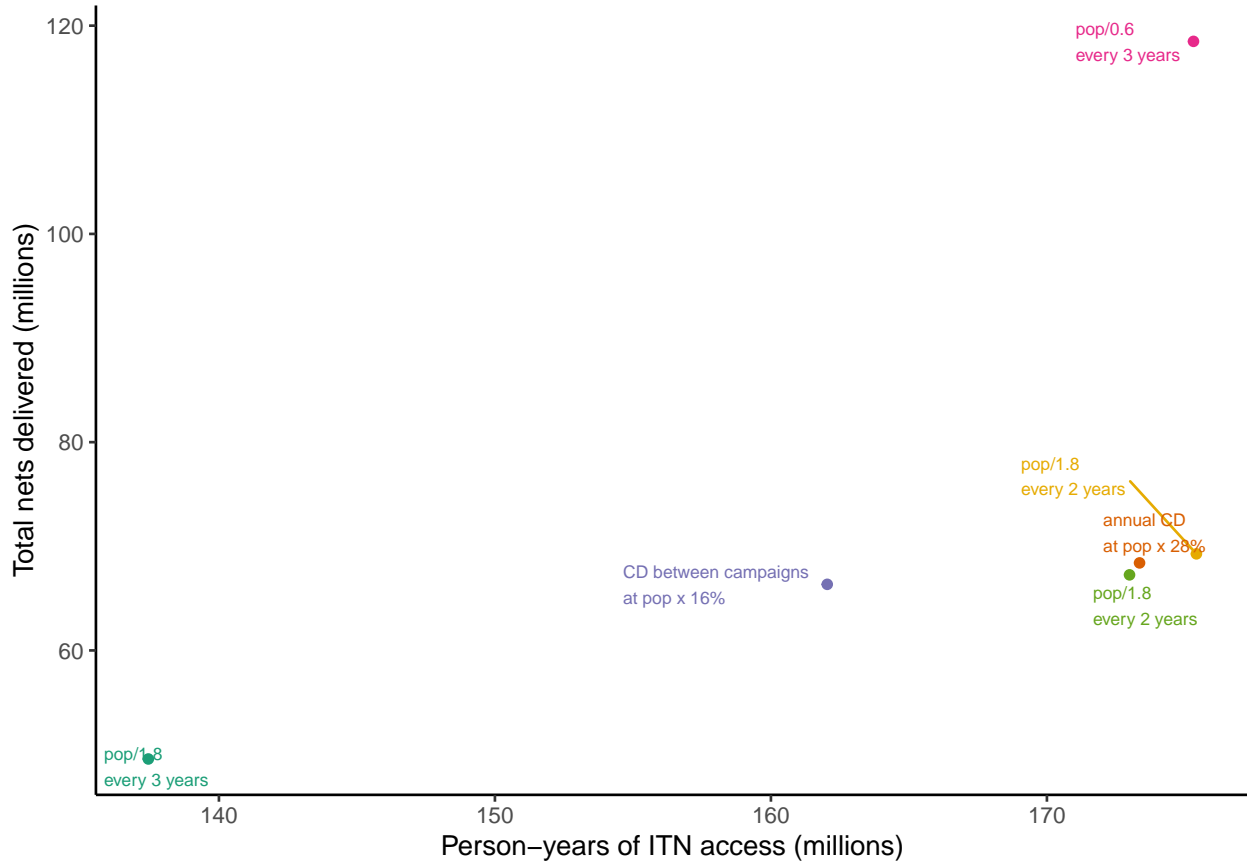

- Scenario
- Status Quo
  - Full scale CD
  - Campaigns + CD
  - 3-year campaigns
  - 2-year campaigns
  - 2-year campaigns (pop/1.8)

GMB: 1.62 years median retention time

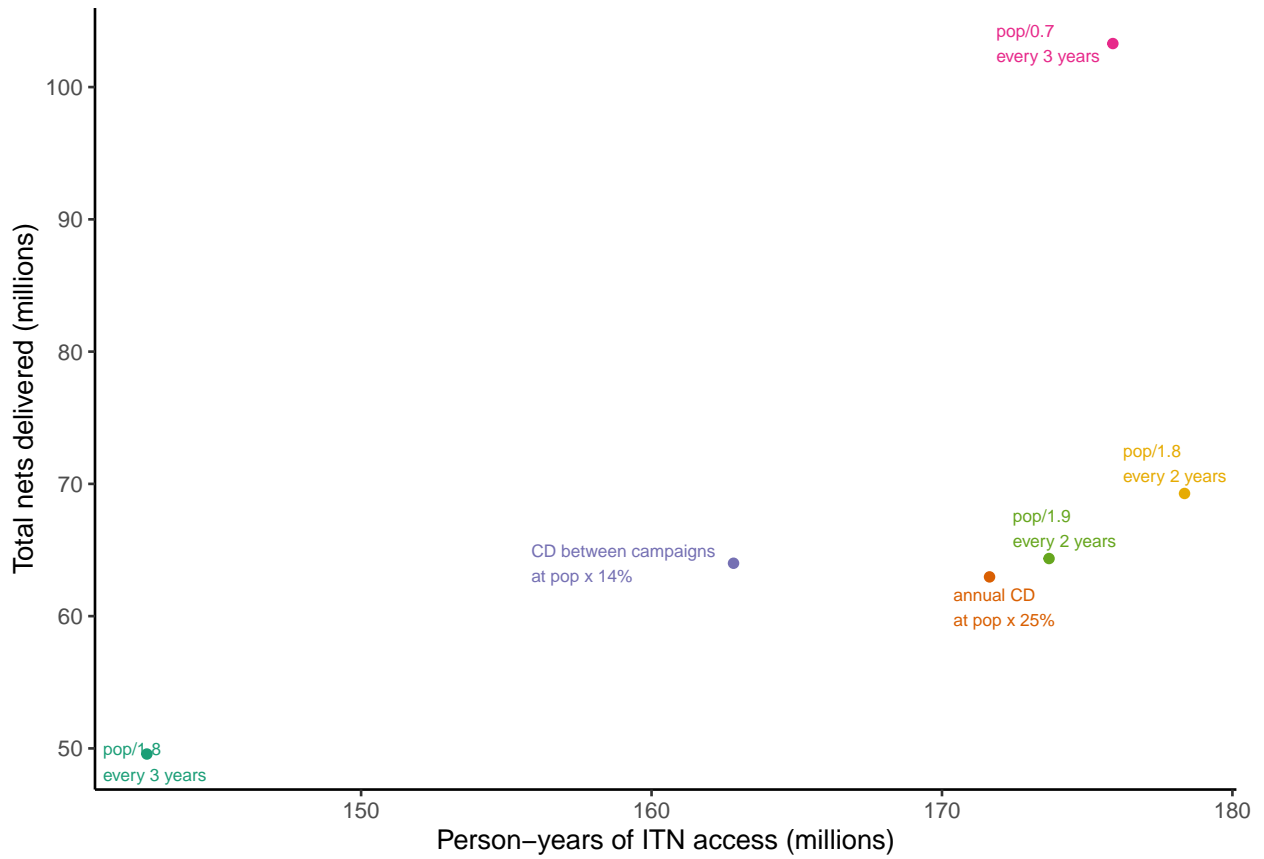

- Scenario
- Status Quo
  - Full scale CD
  - Campaigns + CD
  - 3-year campaigns
  - 2-year campaigns
  - 2-year campaigns (pop/1.8)

GNB: 1.38 years median retention time

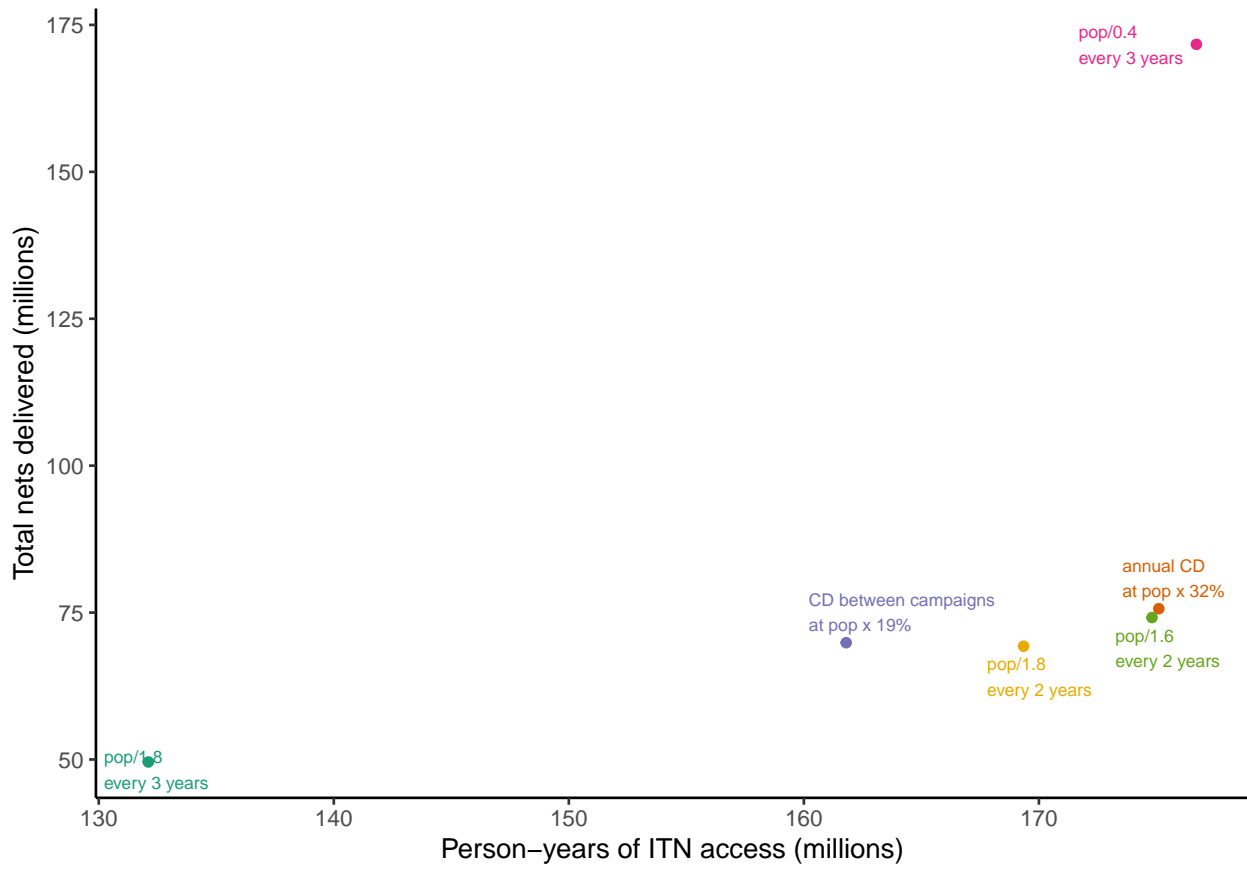

- Scenario
- Status Quo
  - Full scale CD
  - Campaigns + CD
  - 3-year campaigns
  - 2-year campaigns
  - 2-year campaigns (pop/1.8)

GNQ: 3.59 years median retention time

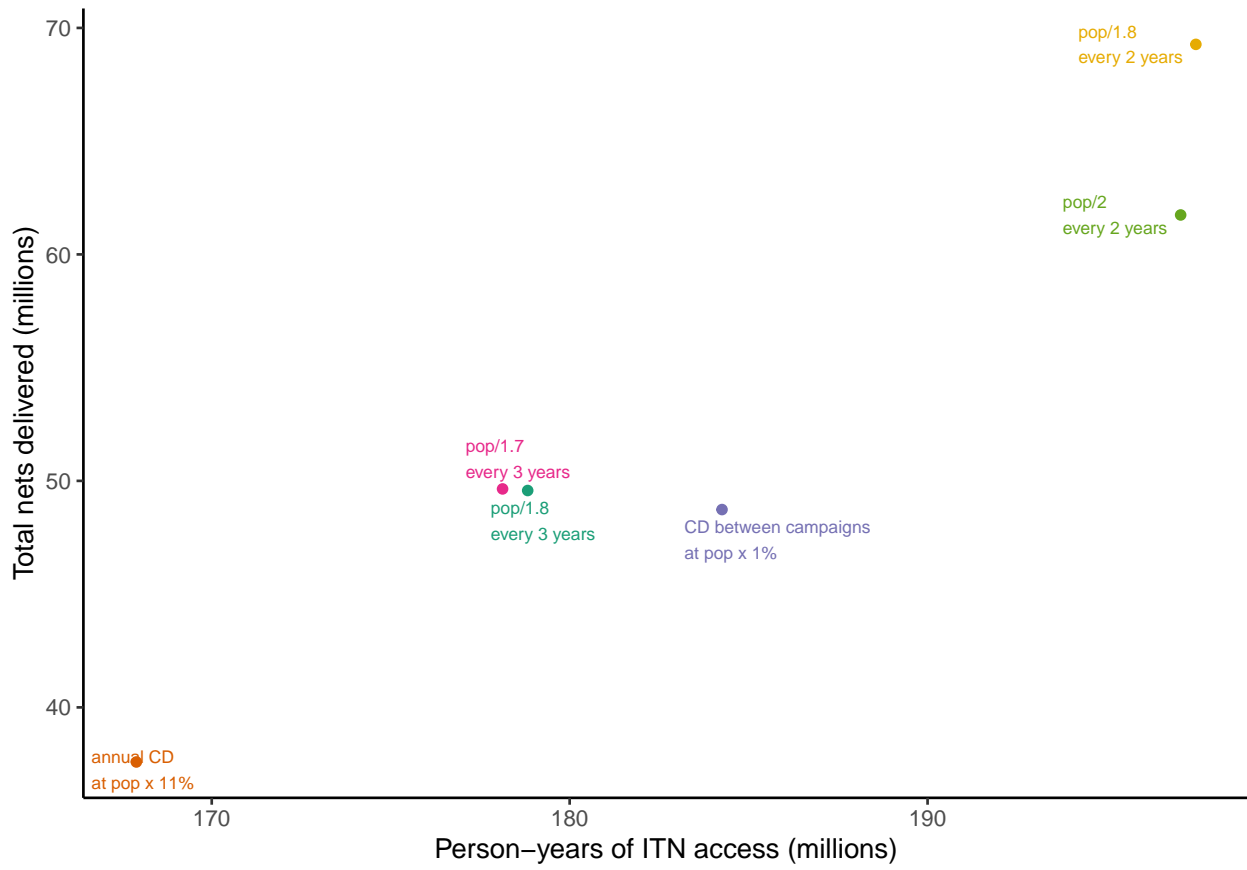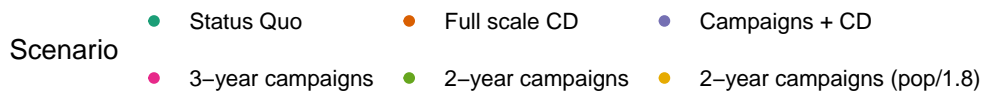

KEN: 2.26 years median retention time

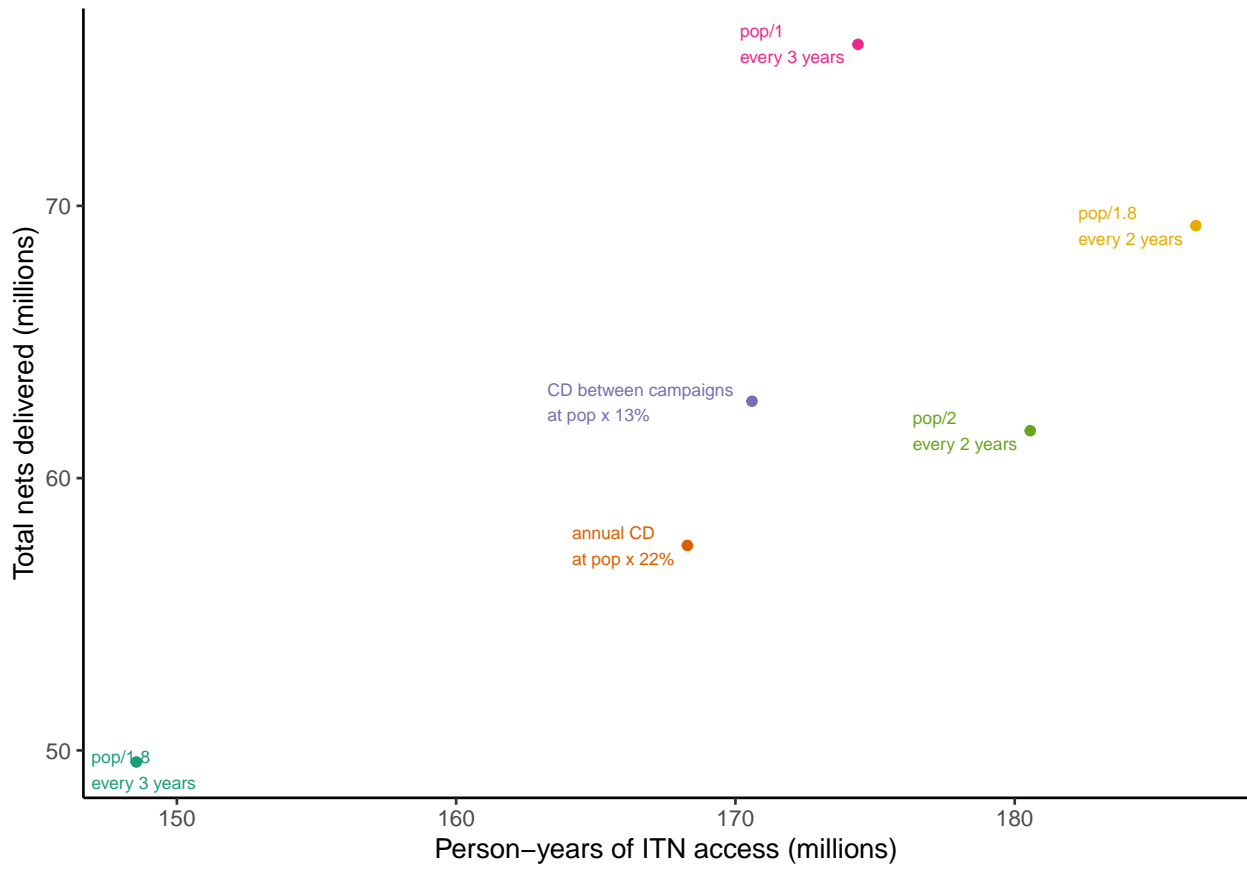

- Scenario
- Status Quo
  - Full scale CD
  - Campaigns + CD
  - 3-year campaigns
  - 2-year campaigns
  - 2-year campaigns (pop/1.8)

LBR: 1.03 years median retention time

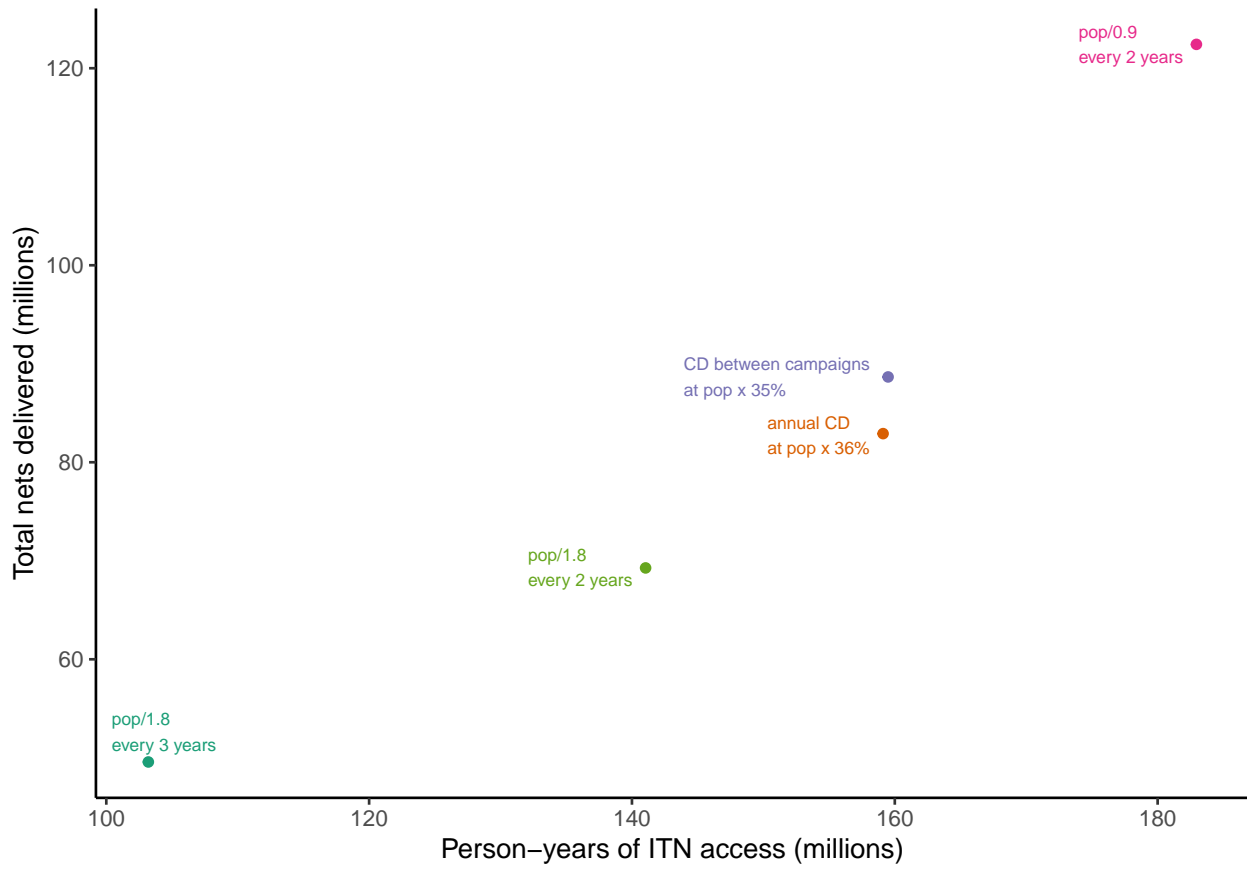

Scenario

- Status Quo
- Full scale CD
- Campaigns + CD
- 3-year campaigns
- 2-year campaigns

MDG: 1.65 years median retention time

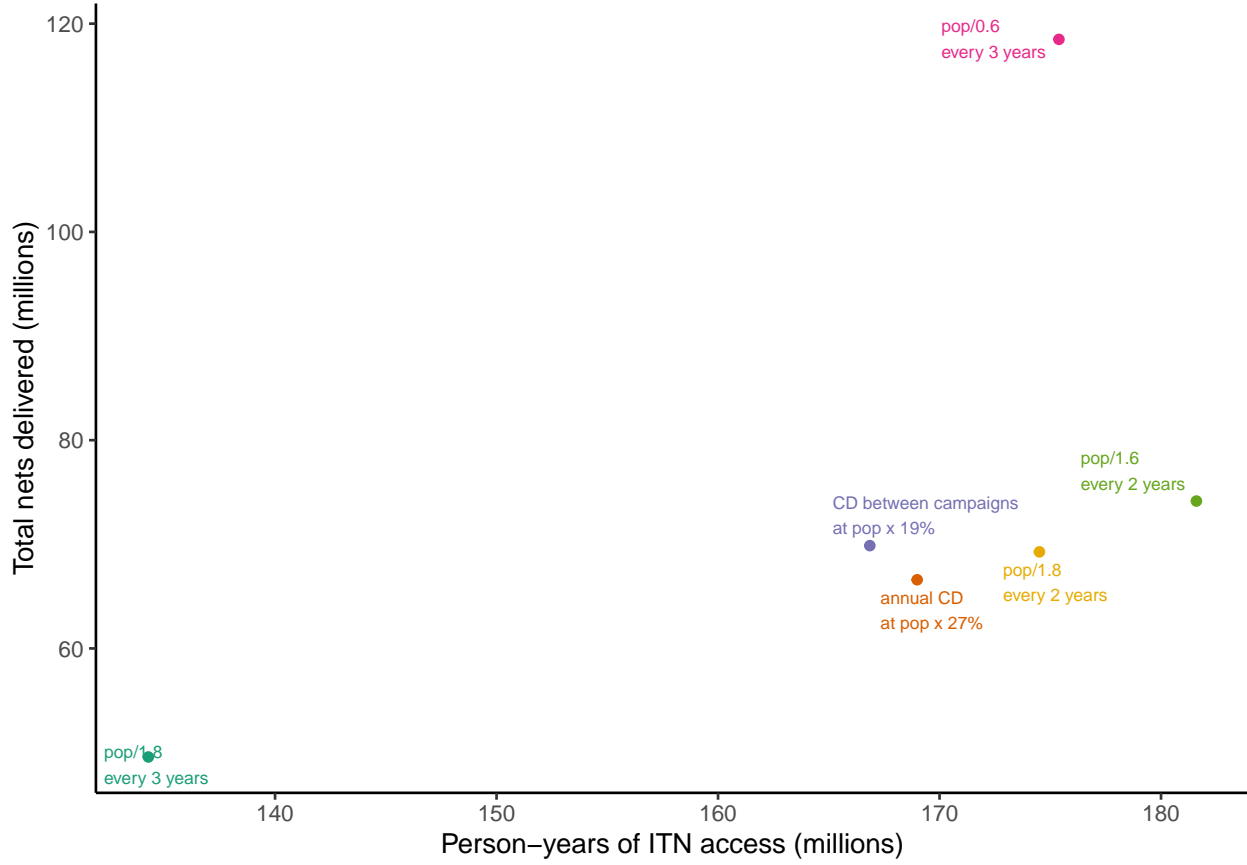

- Scenario
- Status Quo
  - Full scale CD
  - Campaigns + CD
  - 3-year campaigns
  - 2-year campaigns
  - 2-year campaigns (pop/1.8)

MLI: 2.81 years median retention time

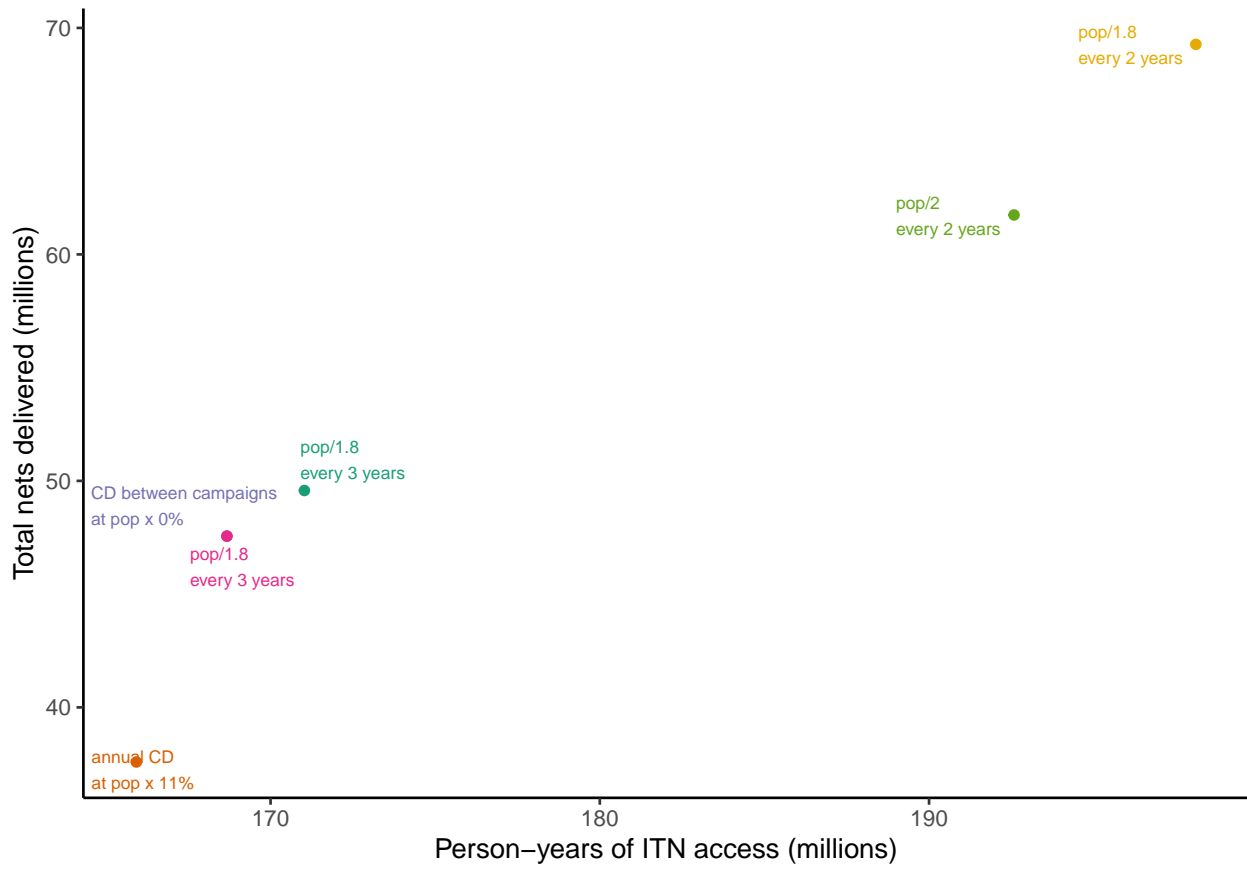

- Scenario
- Status Quo
  - Full scale CD
  - Campaigns + CD
  - 3-year campaigns
  - 2-year campaigns
  - 2-year campaigns (pop/1.8)



MOZ: 1.34 years median retention time

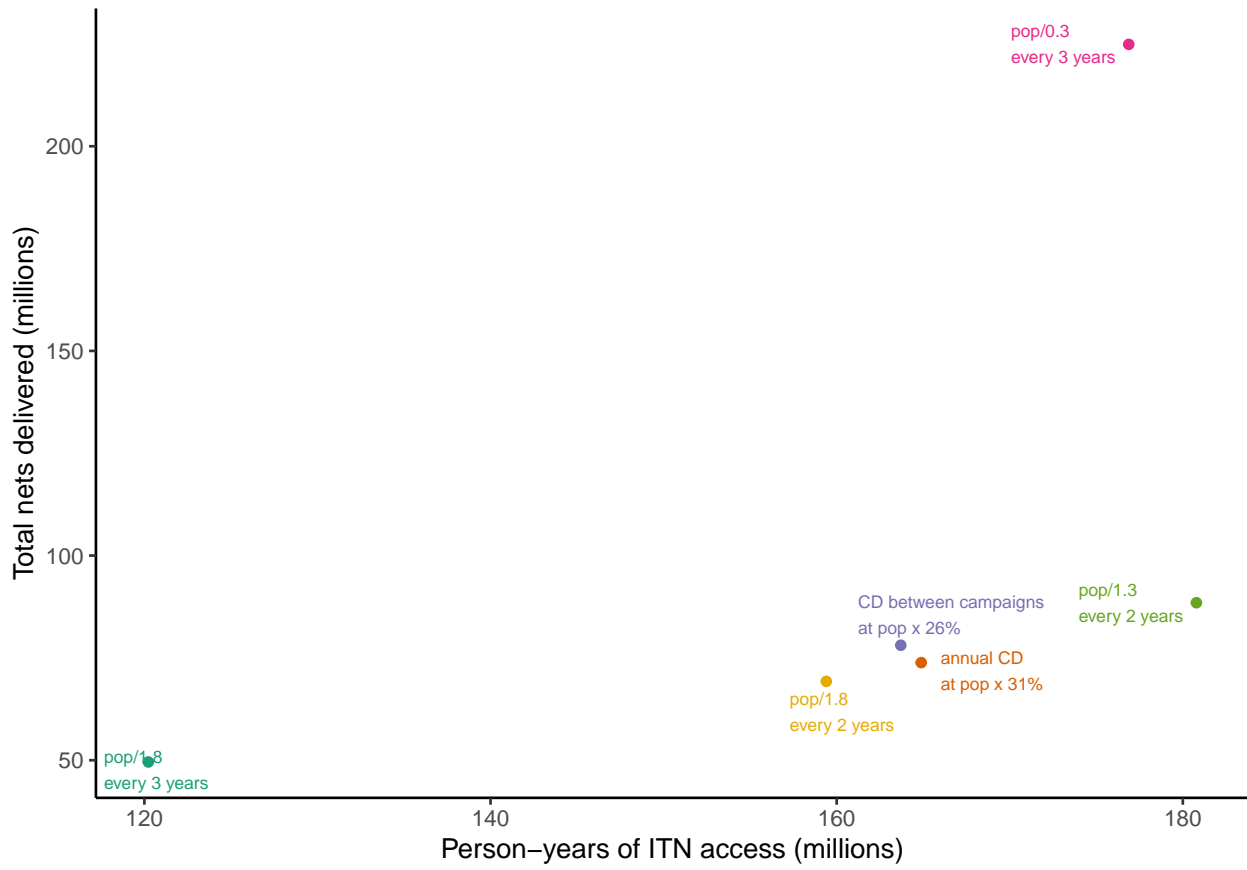

- Scenario
- Status Quo
  - Full scale CD
  - Campaigns + CD
  - 3-year campaigns
  - 2-year campaigns
  - 2-year campaigns (pop/1.8)

MRT: 1.07 years median retention time

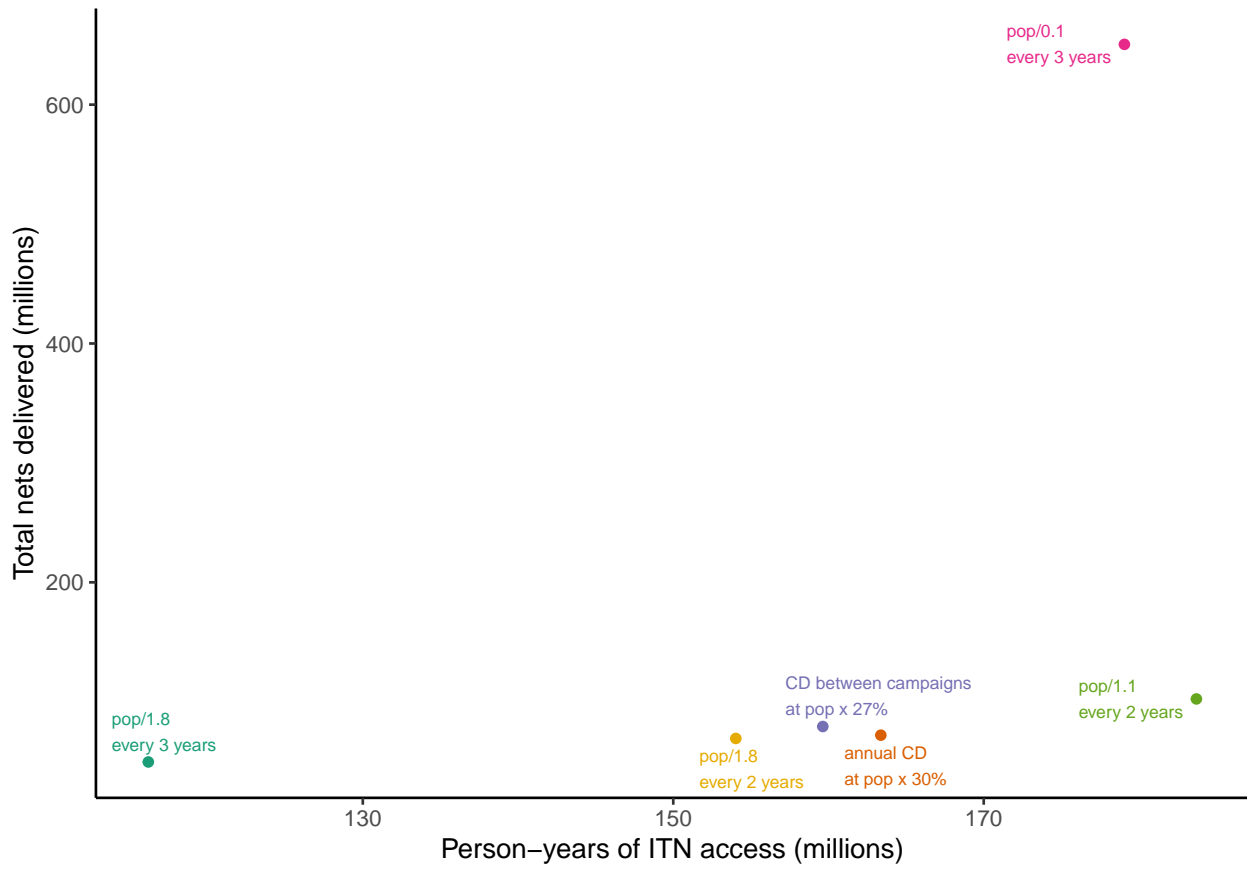

- Scenario
- Status Quo
  - Full scale CD
  - Campaigns + CD
  - 3-year campaigns
  - 2-year campaigns
  - 2-year campaigns (pop/1.8)

MWI: 1.33 years median retention time

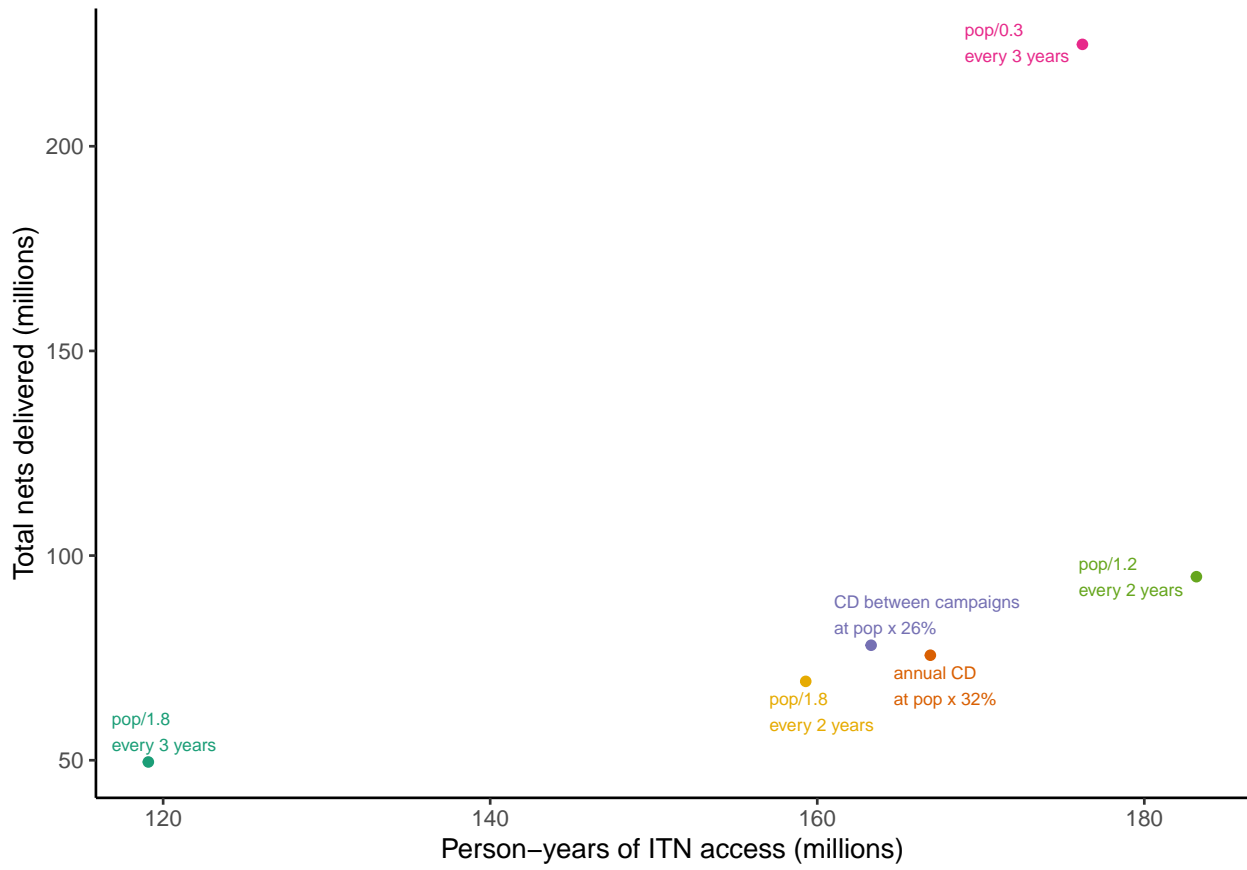

- Scenario
- Status Quo
  - Full scale CD
  - Campaigns + CD
  - 3-year campaigns
  - 2-year campaigns
  - 2-year campaigns (pop/1.8)

NER: 3.5 years median retention time

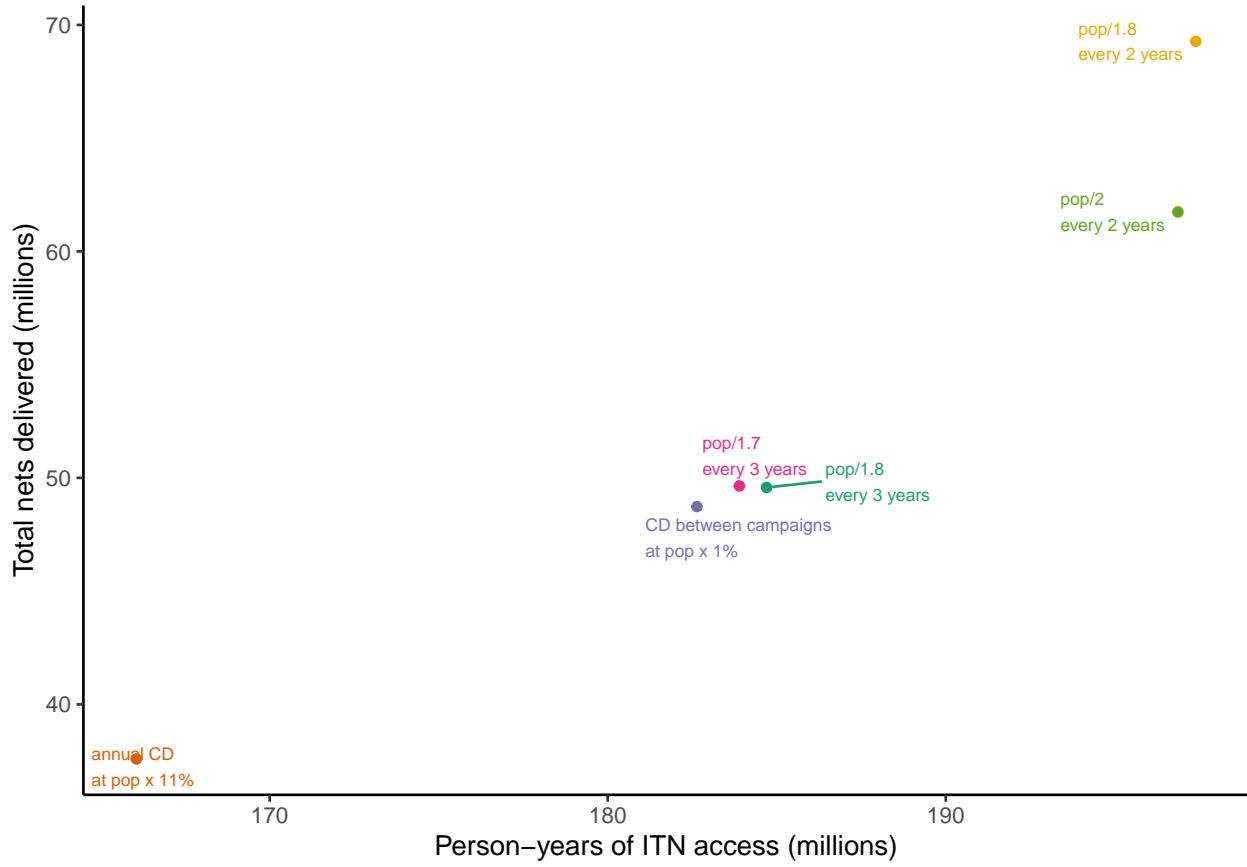

- Scenario
- Status Quo
  - Full scale CD
  - Campaigns + CD
  - 3-year campaigns
  - 2-year campaigns
  - 2-year campaigns (pop/1.8)

NGA: 2.22 years median retention time

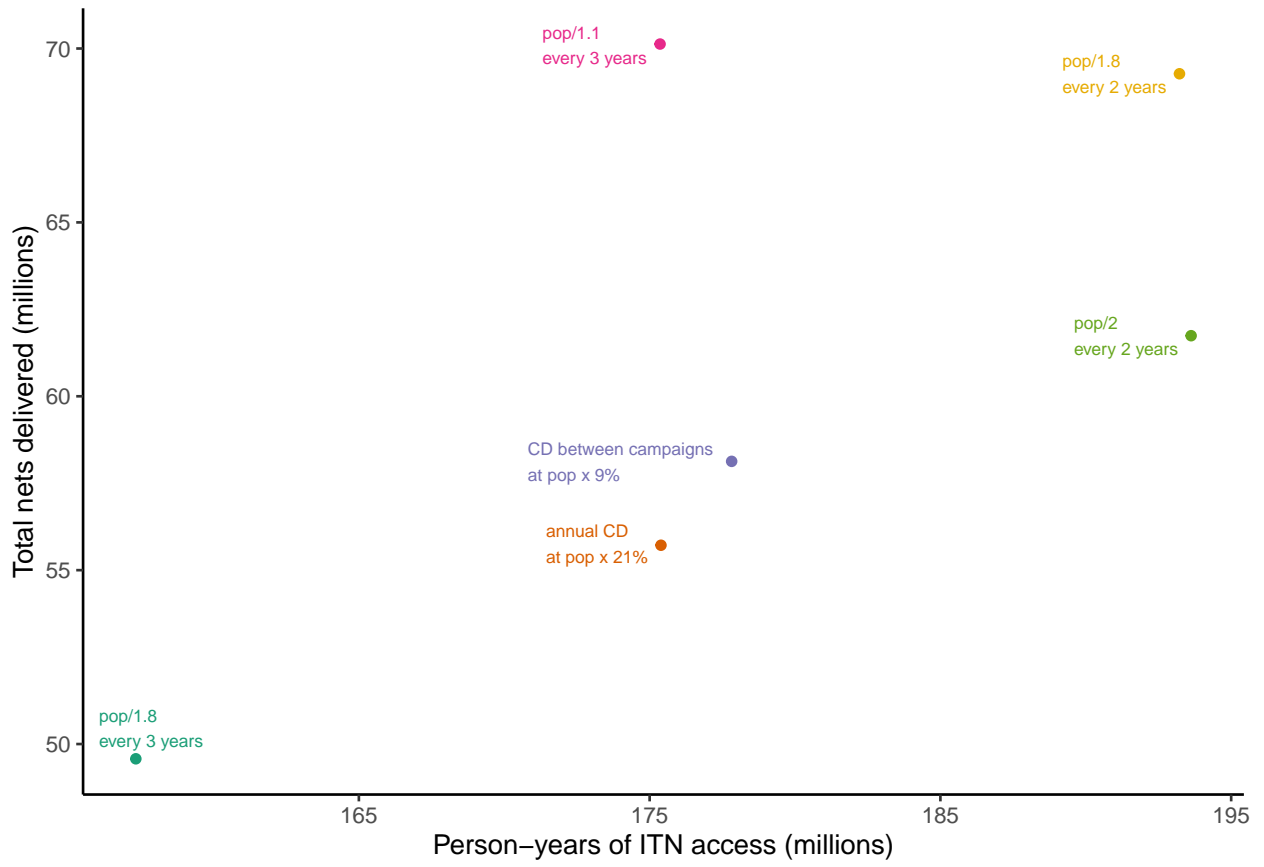

- Scenario
- Status Quo
  - Full scale CD
  - Campaigns + CD
  - 3-year campaigns
  - 2-year campaigns
  - 2-year campaigns (pop/1.8)

RWA: 1.59 years median retention time

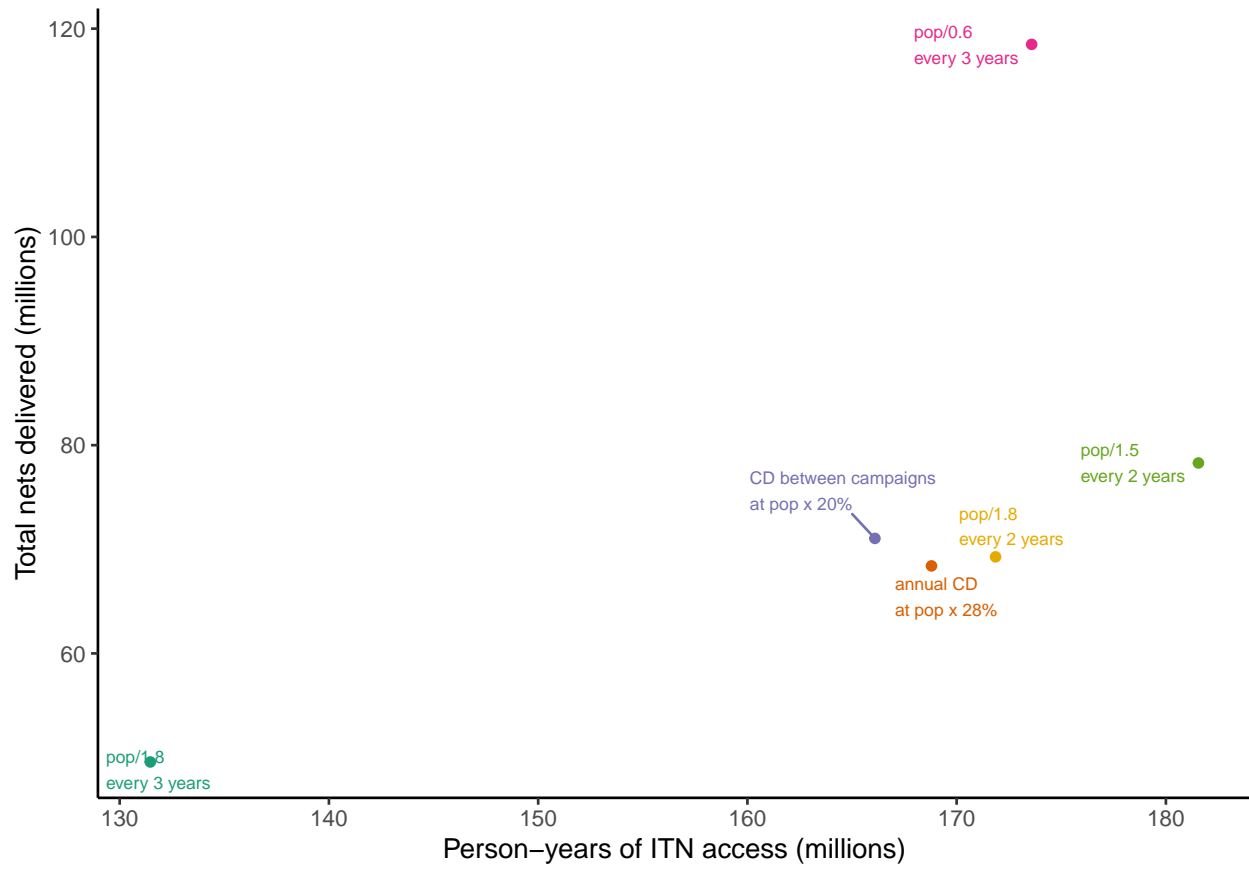

- Scenario
- Status Quo
  - Full scale CD
  - Campaigns + CD
  - 3-year campaigns
  - 2-year campaigns
  - 2-year campaigns (pop/1.8)

SDN: 2.91 years median retention time

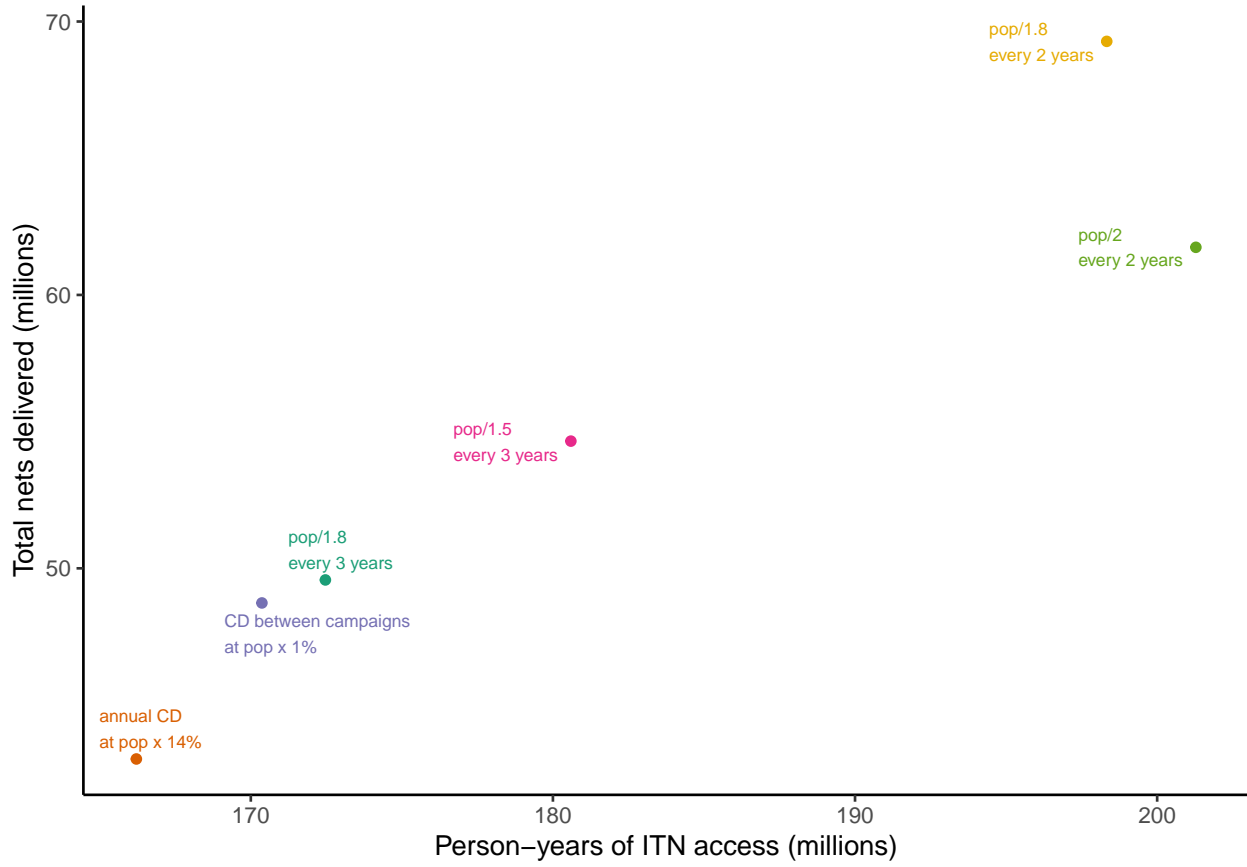

- Scenario
- Status Quo
  - Full scale CD
  - Campaigns + CD
  - 3-year campaigns
  - 2-year campaigns
  - 2-year campaigns (pop/1.8)

SEN: 1.35 years median retention time

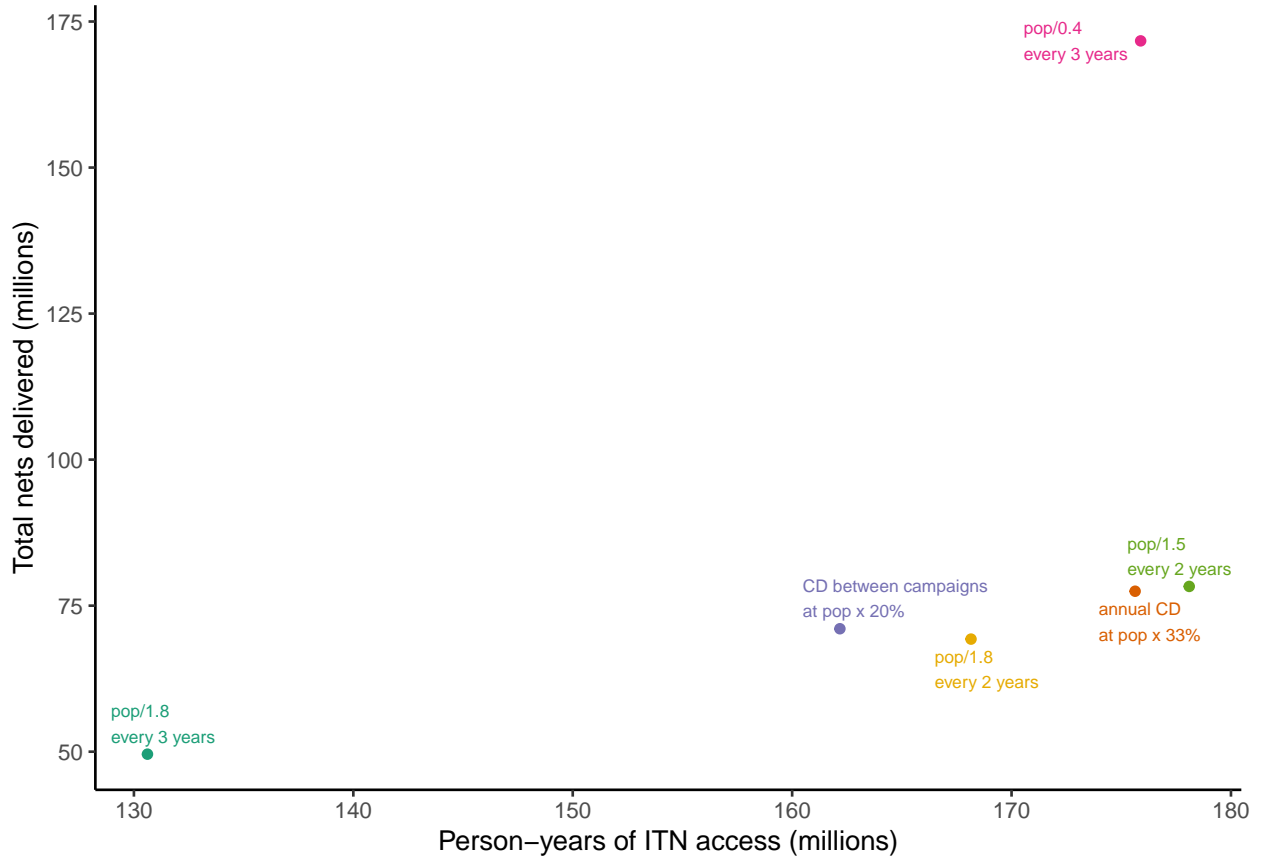

- Scenario
- Status Quo
  - Full scale CD
  - Campaigns + CD
  - 3-year campaigns
  - 2-year campaigns
  - 2-year campaigns (pop/1.8)



SLE: 1.47 years median retention time

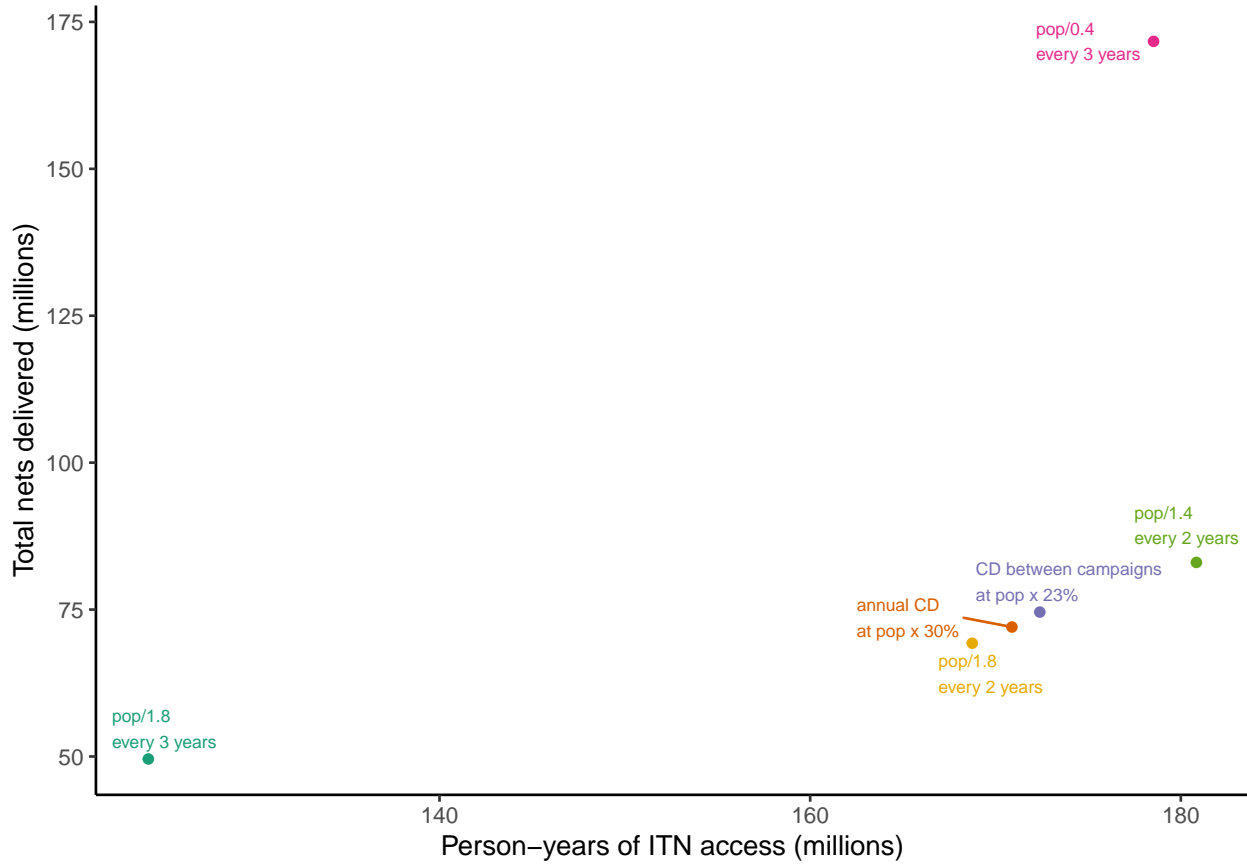

- Scenario
- Status Quo
  - Full scale CD
  - Campaigns + CD
  - 3-year campaigns
  - 2-year campaigns
  - 2-year campaigns (pop/1.8)

SOM: 2.35 years median retention time

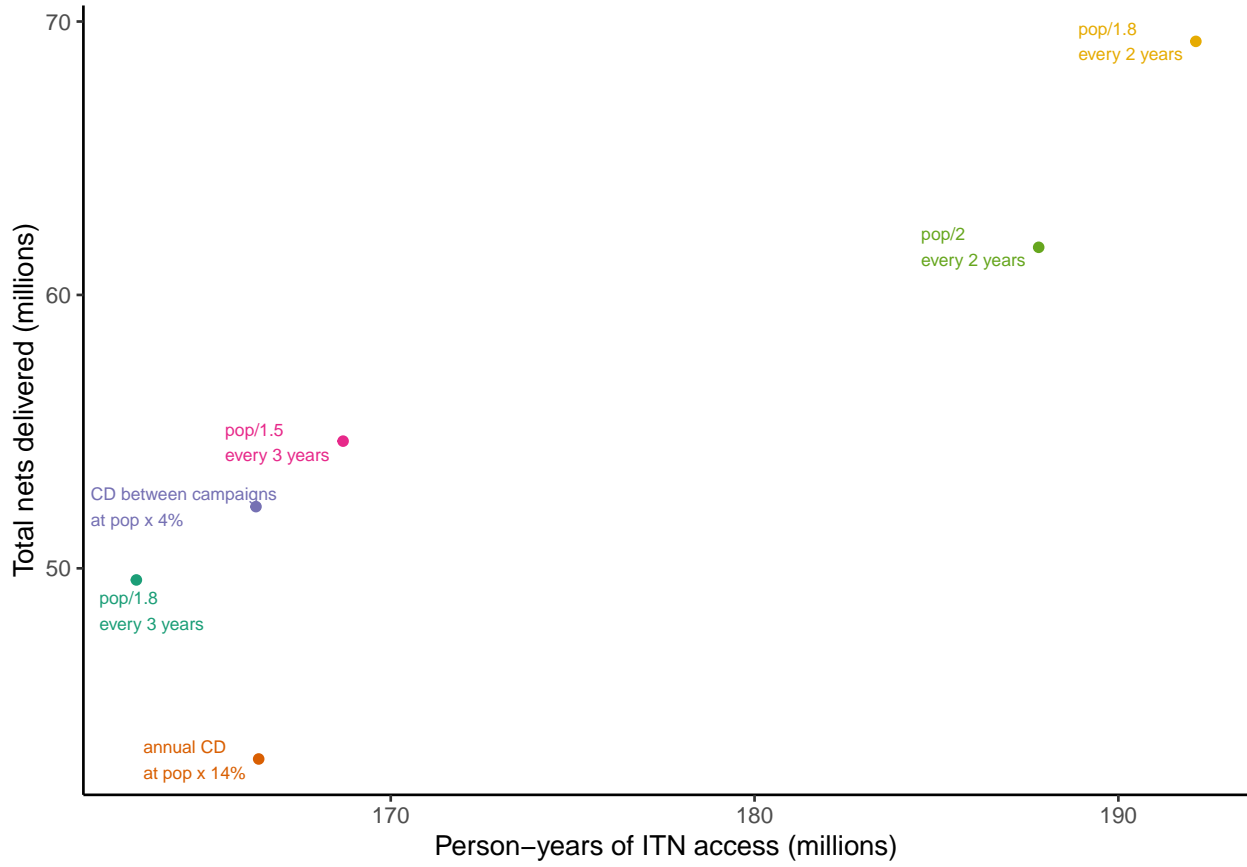

- Scenario
- Status Quo
  - Full scale CD
  - Campaigns + CD
  - 3-year campaigns
  - 2-year campaigns
  - 2-year campaigns (pop/1.8)

SSD: 1.02 years median retention time

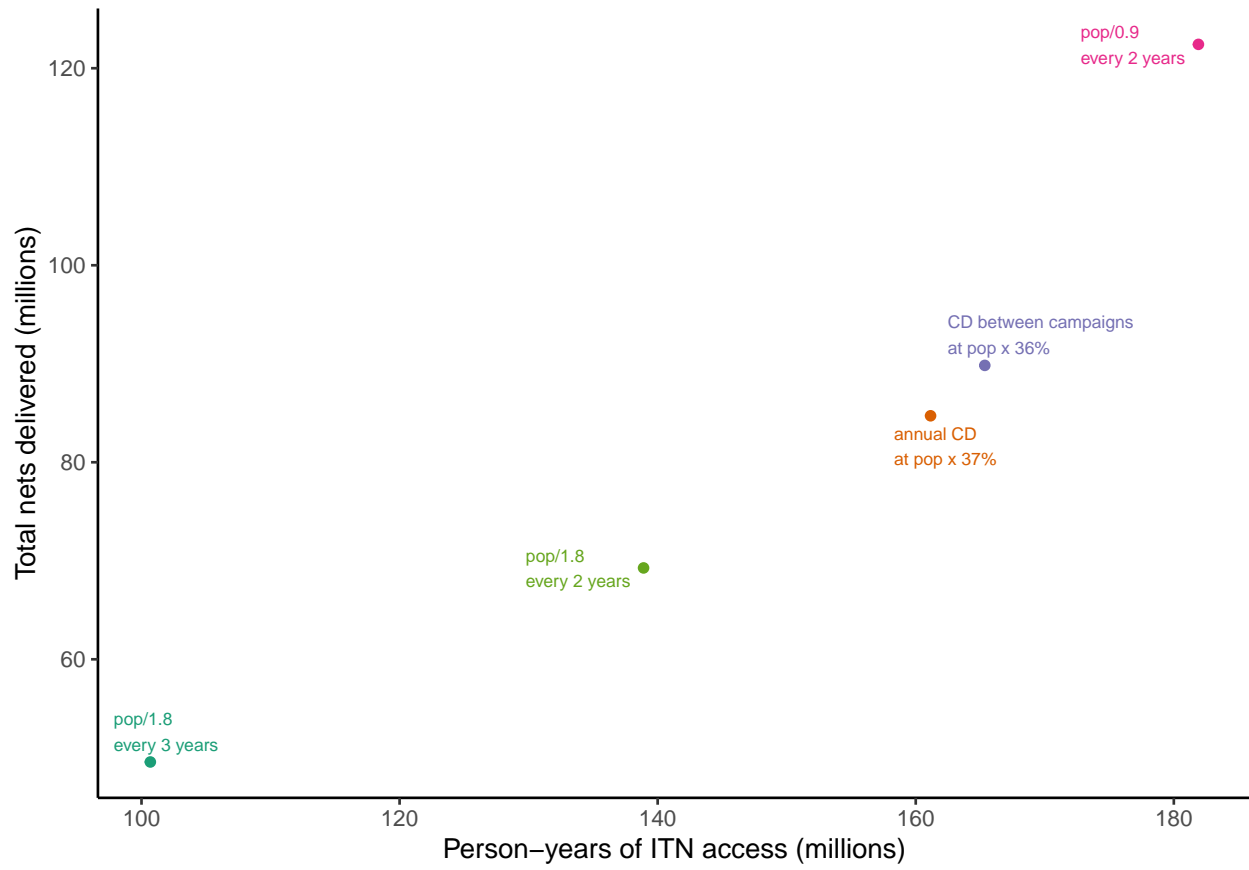

Scenario

- Status Quo
- Full scale CD
- Campaigns + CD
- 3-year campaigns
- 2-year campaigns

TCD: 1.03 years median retention time

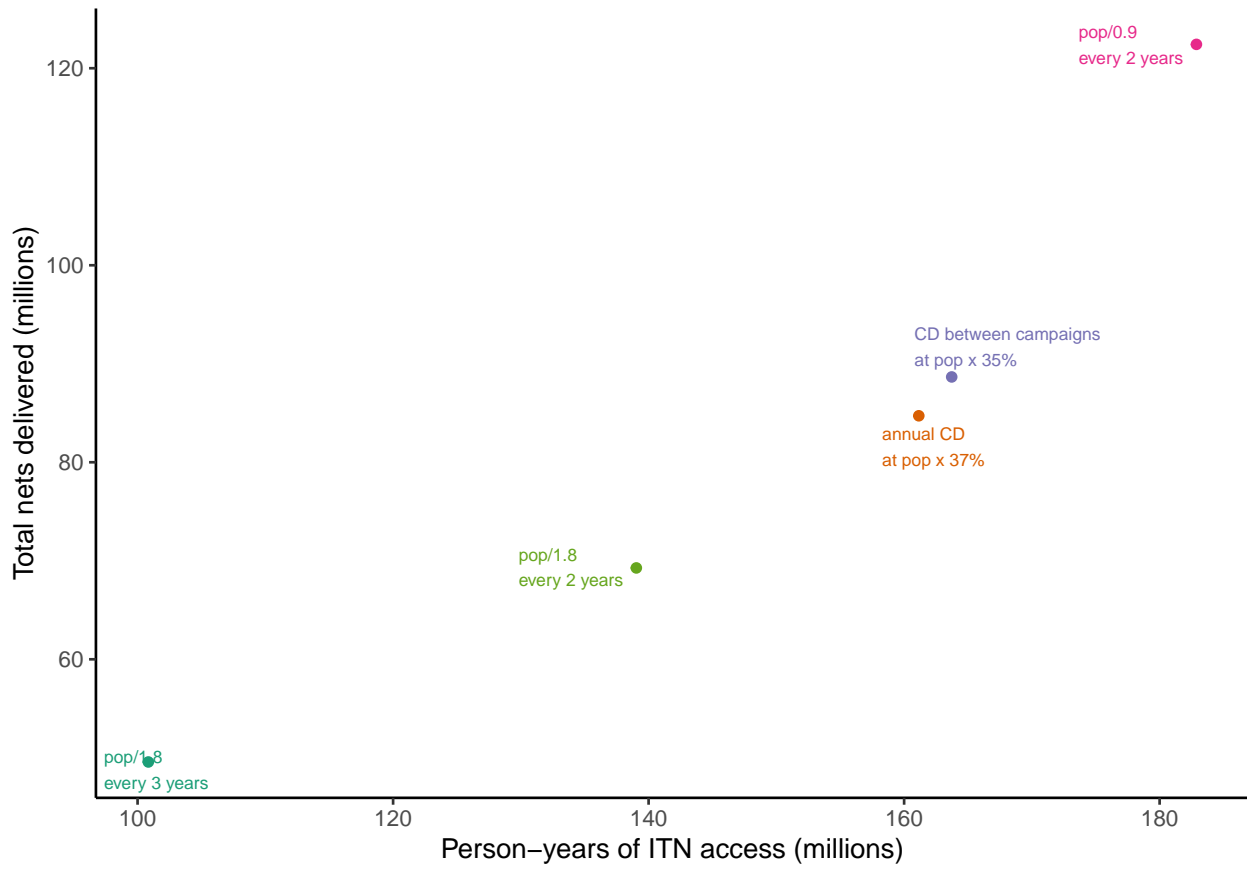

Scenario

- Status Quo
- Full scale CD
- Campaigns + CD
- 3-year campaigns
- 2-year campaigns

TGO: 2.42 years median retention time

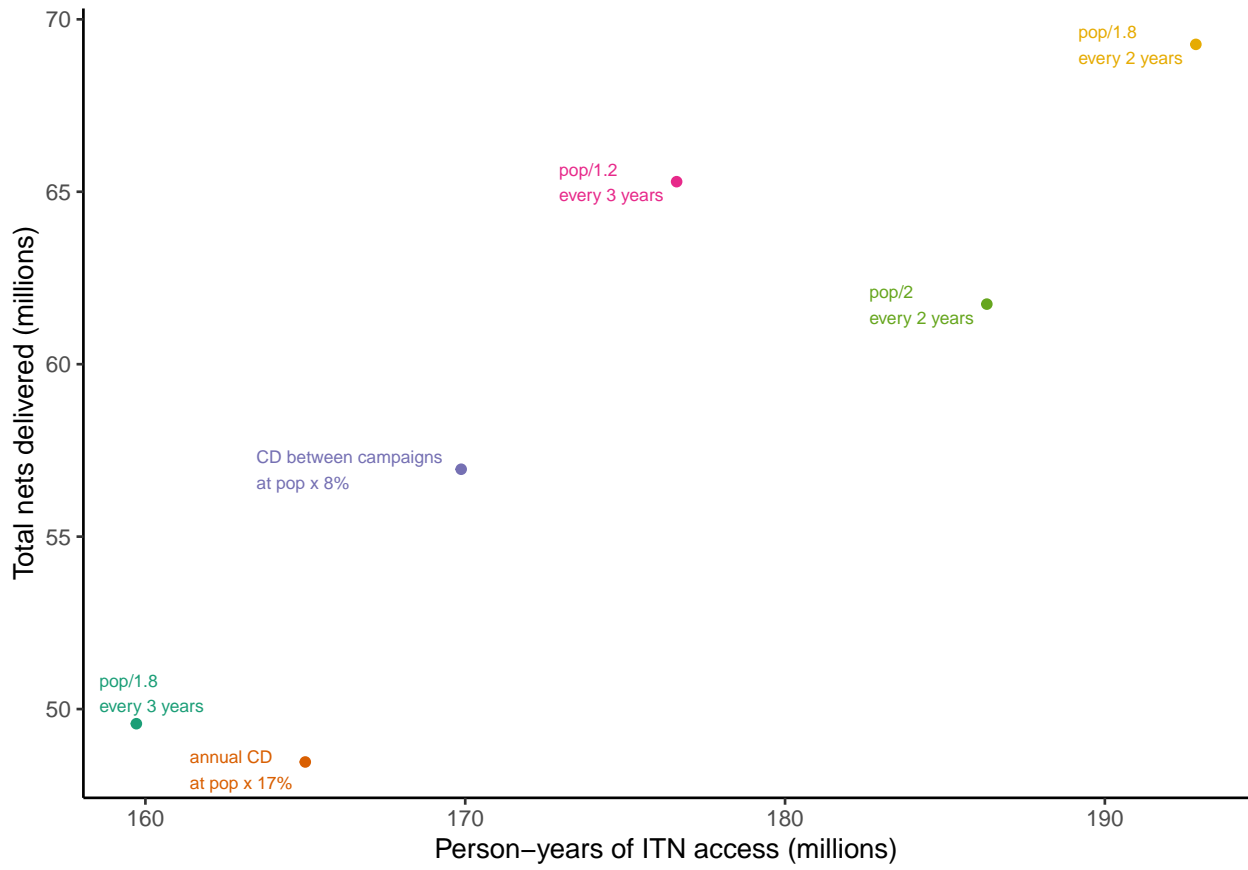

- Scenario
- Status Quo
  - Full scale CD
  - Campaigns + CD
  - 3-year campaigns
  - 2-year campaigns
  - 2-year campaigns (pop/1.8)

TZA: 2.15 years median retention time

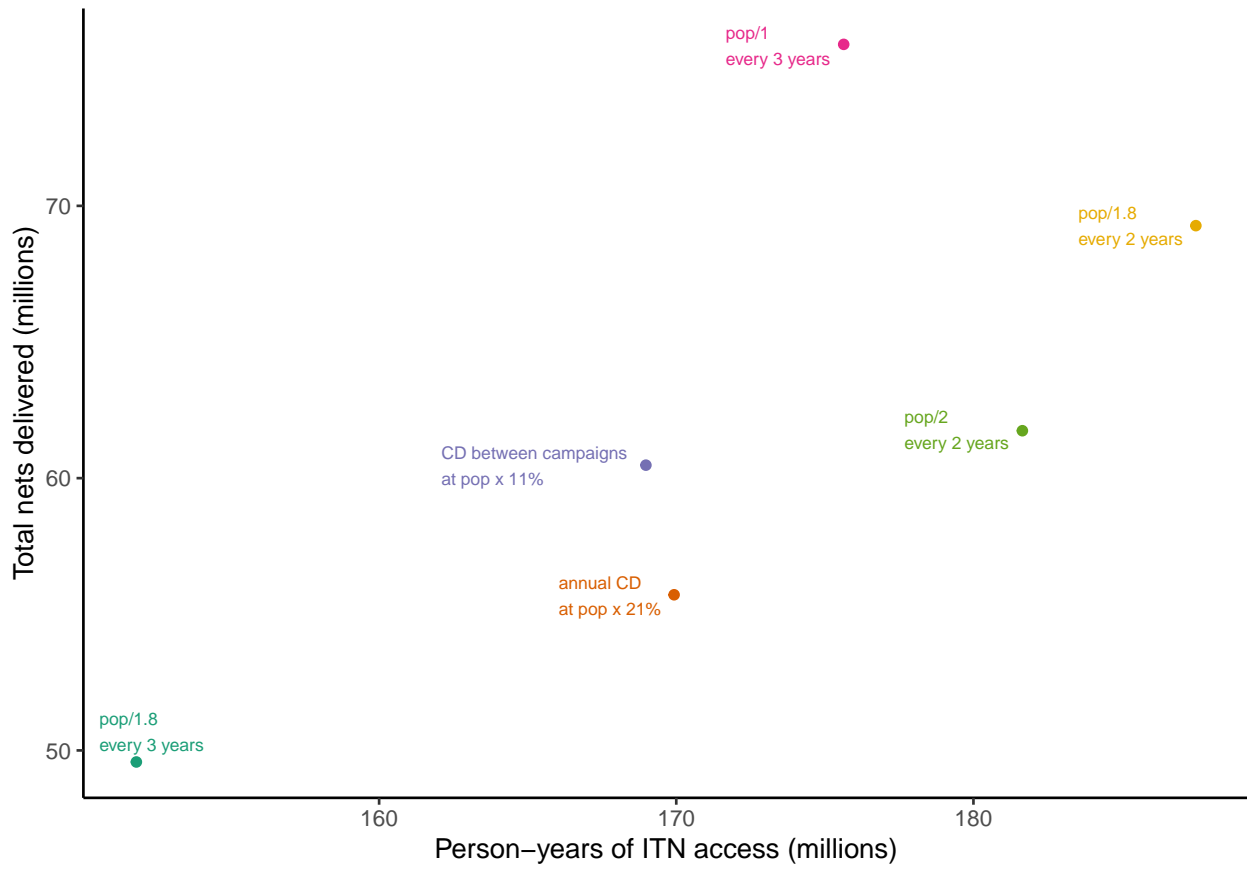

- Scenario
- Status Quo
  - Full scale CD
  - Campaigns + CD
  - 3-year campaigns
  - 2-year campaigns
  - 2-year campaigns (pop/1.8)

UGA: 1.66 years median retention time

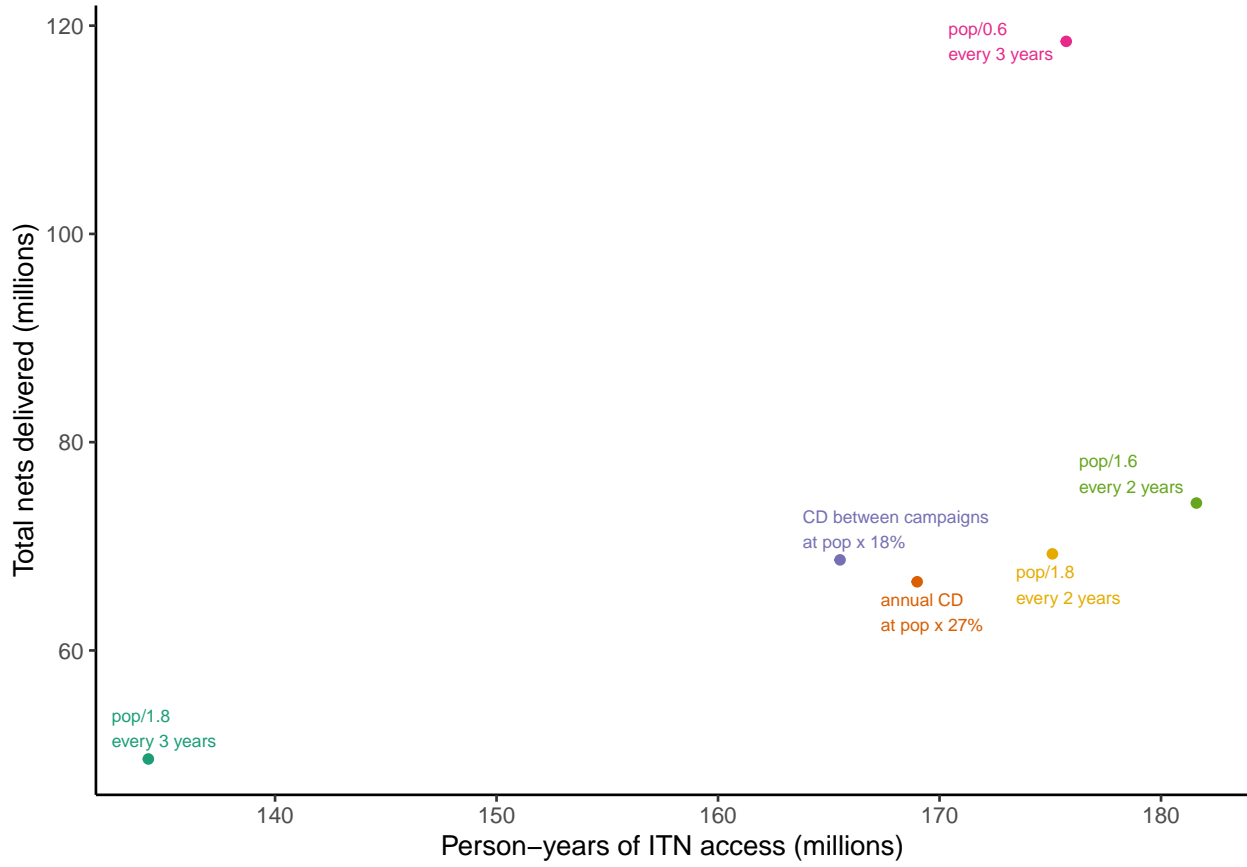

- Scenario
- Status Quo
  - Full scale CD
  - Campaigns + CD
  - 3-year campaigns
  - 2-year campaigns
  - 2-year campaigns (pop/1.8)

ZMB: 1.32 years median retention time

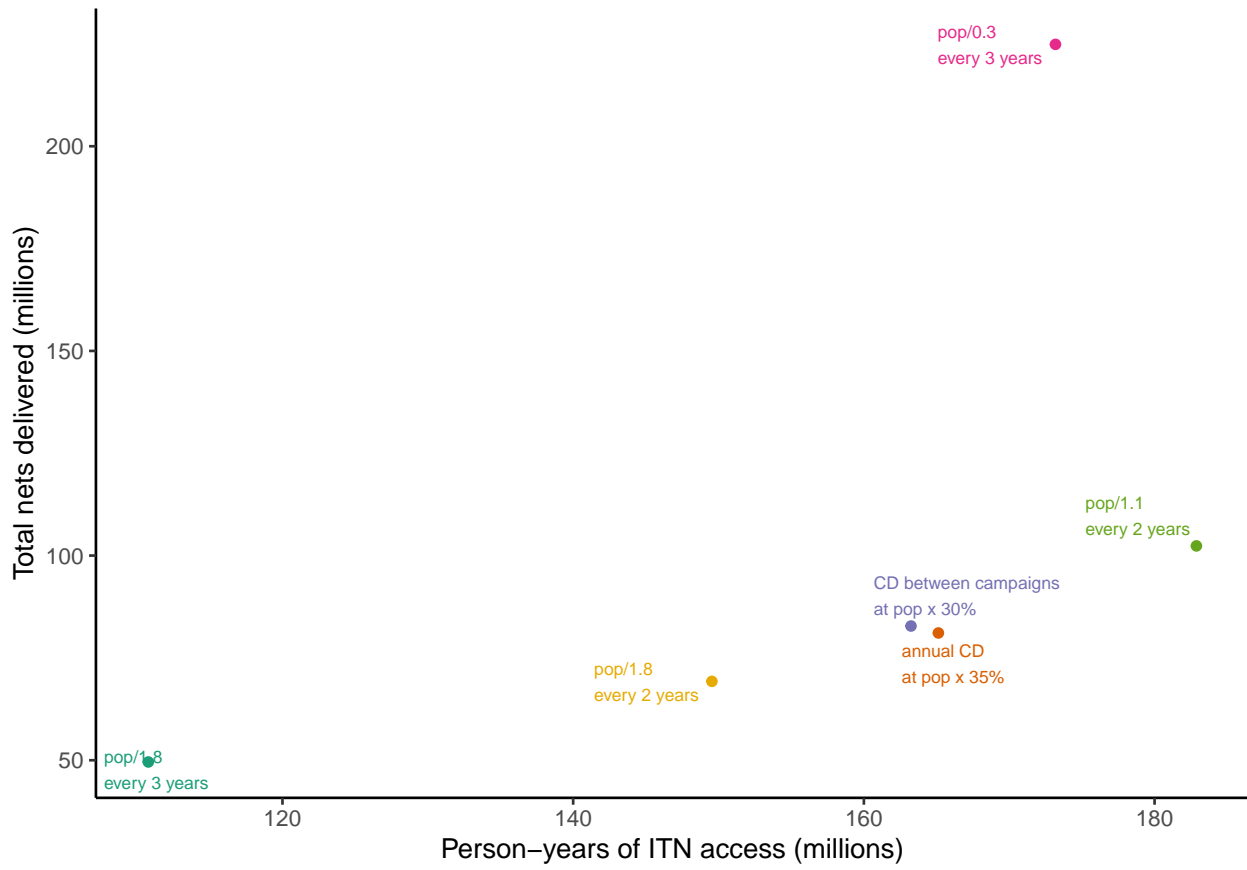

- Scenario
- Status Quo
  - Full scale CD
  - Campaigns + CD
  - 3-year campaigns
  - 2-year campaigns
  - 2-year campaigns (pop/1.8)



ZWE: 2.79 years median retention time

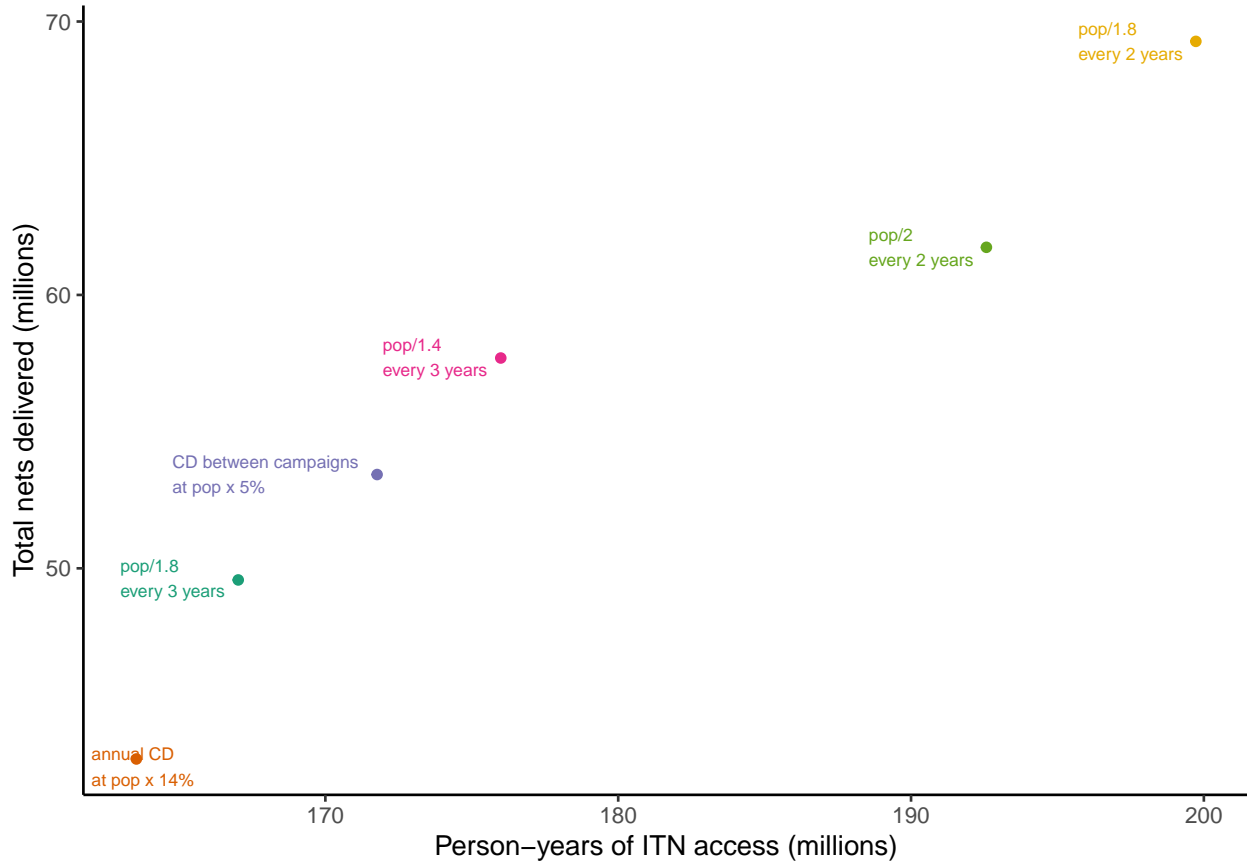

- Scenario
- Status Quo
  - Full scale CD
  - Campaigns + CD
  - 3-year campaigns
  - 2-year campaigns
  - 2-year campaigns (pop/1.8)
